# Supplementary material for: Characterization of fine particles using optomagnetic measurements
Source: Royal Society of Chemistry journal article supplement (doi:10.1039/c6cp08749c), 2017-01-01
Supplement: c6cp08749c2.zip [file fig2.xls]

## Sheet: 2b
$\beta_0$	<cos2>[2]
0.1	0.000222016
0.107727	0.000257607
0.11605	0.000298895
0.125017	0.000346791
0.134677	0.000402347
0.145083	0.000466786
0.156293	0.000541521
0.168369	0.000628188
0.181379	0.000728682
0.195393	0.000845192
0.21049	0.000980253
0.226754	0.00113679
0.244275	0.00131818
0.263149	0.00152832
0.283482	0.00177171
0.305386	0.00205351
0.328982	0.00237967
0.354401	0.00275702
0.381784	0.00319337
0.411284	0.00369769
0.443062	0.00428018
0.477296	0.00495245
0.514175	0.00572768
0.553904	0.00662075
0.596702	0.00764842
0.642807	0.00882942
0.692475	0.0101846
0.74598	0.0117369
0.80362	0.0135116
0.865713	0.0155358
0.932603	0.0178387
1.00466	0.020451
1.08229	0.0234042
1.16591	0.0267301
1.256	0.0304598
1.35305	0.0346221
1.45759	0.039242
1.57022	0.044339
1.69154	0.0499246
1.82224	0.0560007
1.96304	0.0625568
2.11472	0.0695685
2.27812	0.076996
2.45414	0.0847835
2.64376	0.0928591
2.84804	0.101137
3.06809	0.109517
3.30516	0.117894
3.56053	0.126155
3.83564	0.134188
4.13201	0.141886
4.45128	0.14915
4.79521	0.155893
5.16573	0.162042
5.56486	0.167538
5.99484	0.172342
6.45804	0.176425
6.95704	0.179776
7.49458	0.182393
8.07366	0.184287
8.69749	0.185477
9.36952	0.18599
10.0935	0.185859
10.8734	0.185122
11.7135	0.183826
12.6186	0.182019
13.5936	0.179757
14.6439	0.177104
15.7754	0.174039
16.9943	0.170712
18.3074	0.167069
19.7219	0.163166
21.2458	0.159053
22.8874	0.154771
24.6558	0.150361
26.5609	0.145853
28.6131	0.141279
30.824	0.136662
33.2057	0.132027
35.7714	0.127392
38.5353	0.122775
41.5128	0.118193
44.7203	0.113659
48.1757	0.109186
51.8981	0.104785
55.9081	0.100466
60.2279	0.0962372
64.8815	0.0921069
69.8947	0.0880812
75.2953	0.0841656
81.1131	0.0803644
87.3804	0.076681
94.132	0.0731181
101.405	0.0696772
109.241	0.0663591
117.681	0.0631638
126.774	0.0600907
136.569	0.0571384
147.122	0.0543049
158.489	0.0515879

## Sheet: 2a
$t$ [s]	<cos2> (100.00)		$t$ [s]	<cos2> (23.61)		$t$ [s]	<cos2> (17.18)		$t$ [s]	<cos2> (10.73)		$t$ [s]	<cos2> (6.44)		$t$ [s]	<cos2> (4.30)		$t$ [s]	<cos2> (3.22)		$t$ [s]	<cos2> (2.15)		$t$ [s]	<cos2> (1.07)
0	0.333333		0	0.333333		0	0.333333		0	0.333333		0	0.333333		0	0.333333		0	0.333333		0	0.333333		0	0.333333
0.00200401	0.35031		0.00200401	0.334313		0.00200401	0.333853		0.00200401	0.333536		0.00200401	0.333406		0.00200401	0.333366		0.00200401	0.333352		0.00200401	0.333341		0.00200401	0.333335
0.00400802	0.39461		0.00400802	0.337228		0.00400802	0.335404		0.00400802	0.334144		0.00400802	0.333625		0.00400802	0.333463		0.00400802	0.333406		0.00400802	0.333366		0.00400802	0.333341
0.00601202	0.452133		0.00601202	0.342006		0.00601202	0.337966		0.00601202	0.335153		0.00601202	0.333989		0.00601202	0.333626		0.00601202	0.333498		0.00601202	0.333406		0.00601202	0.333351
0.00801603	0.510771		0.00801603	0.348531		0.00801603	0.341505		0.00801603	0.336558		0.00801603	0.334498		0.00801603	0.333853		0.00801603	0.333625		0.00801603	0.333463		0.00801603	0.333366
0.01002	0.564097		0.01002	0.356652		0.01002	0.345976		0.01002	0.338352		0.01002	0.335151		0.01002	0.334145		0.01002	0.333789		0.01002	0.333536		0.01002	0.333384
0.012024	0.610091		0.012024	0.36619		0.012024	0.351323		0.012024	0.340525		0.012024	0.335946		0.012024	0.334501		0.012024	0.333989		0.012024	0.333626		0.012024	0.333406
0.0140281	0.648941		0.0140281	0.376949		0.0140281	0.357481		0.0140281	0.343067		0.0140281	0.336881		0.0140281	0.334921		0.0140281	0.334225		0.0140281	0.333731		0.0140281	0.333432
0.0160321	0.681614		0.0160321	0.388723		0.0160321	0.364378		0.0160321	0.345963		0.0160321	0.337956		0.0160321	0.335404		0.0160321	0.334498		0.0160321	0.333853		0.0160321	0.333462
0.0180361	0.709193		0.0180361	0.401311		0.0180361	0.37194		0.0180361	0.349201		0.0180361	0.339167		0.0180361	0.33595		0.0180361	0.334806		0.0180361	0.33399		0.0180361	0.333497
0.0200401	0.732639		0.0200401	0.414513		0.0200401	0.380086		0.0200401	0.352764		0.0200401	0.340513		0.0200401	0.336559		0.0200401	0.335149		0.0200401	0.334144		0.0200401	0.333535
0.0220441	0.752742		0.0220441	0.428149		0.0220441	0.388738		0.0220441	0.356636		0.0220441	0.34199		0.0220441	0.33723		0.0220441	0.335528		0.0220441	0.334314		0.0220441	0.333577
0.0240481	0.770127		0.0240481	0.442052		0.0240481	0.397818		0.0240481	0.360798		0.0240481	0.343596		0.0240481	0.337962		0.0240481	0.335942		0.0240481	0.334499		0.0240481	0.333623
0.0260521	0.785287		0.0260521	0.456074		0.0260521	0.407247		0.0260521	0.365232		0.0260521	0.345328		0.0260521	0.338754		0.0260521	0.336391		0.0260521	0.3347		0.0260521	0.333673
0.0280561	0.798607		0.0280561	0.470091		0.0280561	0.416954		0.0280561	0.36992		0.0280561	0.347183		0.0280561	0.339607		0.0280561	0.336874		0.0280561	0.334918		0.0280561	0.333728
0.0300601	0.810395		0.0300601	0.483996		0.0300601	0.42687		0.0300601	0.374841		0.0300601	0.349157		0.0300601	0.340518		0.0300601	0.337392		0.0300601	0.33515		0.0300601	0.333786
0.0320641	0.820895		0.0320641	0.497701		0.0320641	0.436932		0.0320641	0.379977		0.0320641	0.351247		0.0320641	0.341487		0.0320641	0.337944		0.0320641	0.335399		0.0320641	0.333848
0.0340681	0.830303		0.0340681	0.511139		0.0340681	0.44708		0.0340681	0.385307		0.0340681	0.353449		0.0340681	0.342514		0.0340681	0.33853		0.0340681	0.335663		0.0340681	0.333914
0.0360721	0.838777		0.0360721	0.524254		0.0360721	0.457262		0.0360721	0.390812		0.0360721	0.355758		0.0360721	0.343596		0.0360721	0.339149		0.0360721	0.335942		0.0360721	0.333984
0.0380762	0.846448		0.0380762	0.537007		0.0380762	0.467433		0.0380762	0.396473		0.0380762	0.358172		0.0380762	0.344734		0.0380762	0.3398		0.0380762	0.336237		0.0380762	0.334057
0.0400802	0.853424		0.0400802	0.54937		0.0400802	0.47755		0.0400802	0.402271		0.0400802	0.360686		0.0400802	0.345927		0.0400802	0.340485		0.0400802	0.336547		0.0400802	0.334135
0.0420842	0.859794		0.0420842	0.561324		0.0420842	0.487579		0.0420842	0.408189		0.0420842	0.363295		0.0420842	0.347172		0.0420842	0.341201		0.0420842	0.336872		0.0420842	0.334217
0.0440882	0.865632		0.0440882	0.57286		0.0440882	0.497488		0.0440882	0.414207		0.0440882	0.365996		0.0440882	0.348469		0.0440882	0.341949		0.0440882	0.337211		0.0440882	0.334302
0.0460922	0.871003		0.0460922	0.583974		0.0460922	0.507253		0.0460922	0.42031		0.0460922	0.368784		0.0460922	0.349817		0.0460922	0.342729		0.0460922	0.337566		0.0460922	0.334391
0.0480962	0.875958		0.0480962	0.594666		0.0480962	0.516852		0.0480962	0.426481		0.0480962	0.371656		0.0480962	0.351215		0.0480962	0.343539		0.0480962	0.337936		0.0480962	0.334484
0.0501002	0.880545		0.0501002	0.604944		0.0501002	0.526267		0.0501002	0.432706		0.0501002	0.374605		0.0501002	0.352662		0.0501002	0.34438		0.0501002	0.33832		0.0501002	0.334581
0.0521042	0.884802		0.0521042	0.614815		0.0521042	0.535486		0.0521042	0.438969		0.0521042	0.377629		0.0521042	0.354155		0.0521042	0.34525		0.0521042	0.338719		0.0521042	0.334682
0.0541082	0.888763		0.0541082	0.62429		0.0541082	0.544498		0.0541082	0.445257		0.0541082	0.380723		0.0541082	0.355695		0.0541082	0.34615		0.0541082	0.339132		0.0541082	0.334786
0.0561122	0.892459		0.0561122	0.633383		0.0561122	0.553294		0.0561122	0.451557		0.0561122	0.383882		0.0561122	0.357279		0.0561122	0.347079		0.0561122	0.339559		0.0561122	0.334894
0.0581162	0.895913		0.0581162	0.642107		0.0581162	0.561871		0.0581162	0.457858		0.0581162	0.387103		0.0581162	0.358907		0.0581162	0.348036		0.0581162	0.34		0.0581162	0.335006
0.0601202	0.89915		0.0601202	0.650476		0.0601202	0.570225		0.0601202	0.464149		0.0601202	0.39038		0.0601202	0.360577		0.0601202	0.349021		0.0601202	0.340455		0.0601202	0.335121
0.0621242	0.902189		0.0621242	0.658506		0.0621242	0.578353		0.0621242	0.470419		0.0621242	0.39371		0.0621242	0.362288		0.0621242	0.350034		0.0621242	0.340924		0.0621242	0.335241
0.0641283	0.905047		0.0641283	0.66621		0.0641283	0.586258		0.0641283	0.47666		0.0641283	0.397089		0.0641283	0.364038		0.0641283	0.351073		0.0641283	0.341406		0.0641283	0.335363
0.0661323	0.90774		0.0661323	0.673604		0.0661323	0.593939		0.0661323	0.482864		0.0661323	0.400512		0.0661323	0.365826		0.0661323	0.352138		0.0661323	0.341902		0.0661323	0.33549
0.0681363	0.910282		0.0681363	0.680702		0.0681363	0.601401		0.0681363	0.489022		0.0681363	0.403976		0.0681363	0.367651		0.0681363	0.353229		0.0681363	0.342411		0.0681363	0.33562
0.0701403	0.912684		0.0701403	0.687518		0.0701403	0.608644		0.0701403	0.495128		0.0701403	0.407476		0.0701403	0.369511		0.0701403	0.354345		0.0701403	0.342933		0.0701403	0.335753
0.0721443	0.914958		0.0721443	0.694066		0.0721443	0.615675		0.0721443	0.501176		0.0721443	0.41101		0.0721443	0.371405		0.0721443	0.355485		0.0721443	0.343468		0.0721443	0.335891
0.0741483	0.917114		0.0741483	0.700358		0.0741483	0.622497		0.0741483	0.50716		0.0741483	0.414572		0.0741483	0.373332		0.0741483	0.356649		0.0741483	0.344016		0.0741483	0.336031
0.0761523	0.919161		0.0761523	0.706407		0.0761523	0.629116		0.0761523	0.513077		0.0761523	0.418159		0.0761523	0.375289		0.0761523	0.357837		0.0761523	0.344576		0.0761523	0.336175
0.0781563	0.921106		0.0781563	0.712225		0.0781563	0.635536		0.0781563	0.518921		0.0781563	0.421769		0.0781563	0.377277		0.0781563	0.359047		0.0781563	0.345148		0.0781563	0.336323
0.0801603	0.922957		0.0801603	0.717824		0.0801603	0.641764		0.0801603	0.524689		0.0801603	0.425397		0.0801603	0.379293		0.0801603	0.360279		0.0801603	0.345733		0.0801603	0.336474
0.0821643	0.924721		0.0821643	0.723213		0.0821643	0.647804		0.0821643	0.530378		0.0821643	0.429041		0.0821643	0.381337		0.0821643	0.361533		0.0821643	0.34633		0.0821643	0.336628
0.0841683	0.926403		0.0841683	0.728404		0.0841683	0.653662		0.0841683	0.535986		0.0841683	0.432697		0.0841683	0.383406		0.0841683	0.362807		0.0841683	0.346938		0.0841683	0.336786
0.0861723	0.928009		0.0861723	0.733406		0.0861723	0.659345		0.0861723	0.54151		0.0861723	0.436361		0.0861723	0.385499		0.0861723	0.364102		0.0861723	0.347558		0.0861723	0.336947
0.0881764	0.929544		0.0881764	0.738227		0.0881764	0.664858		0.0881764	0.546949		0.0881764	0.440033		0.0881764	0.387616		0.0881764	0.365416		0.0881764	0.34819		0.0881764	0.337111
0.0901804	0.931012		0.0901804	0.742878		0.0901804	0.670206		0.0901804	0.552301		0.0901804	0.443707		0.0901804	0.389755		0.0901804	0.366749		0.0901804	0.348832		0.0901804	0.337279
0.0921844	0.932418		0.0921844	0.747365		0.0921844	0.675396		0.0921844	0.557566		0.0921844	0.447383		0.0921844	0.391914		0.0921844	0.368101		0.0921844	0.349486		0.0921844	0.337449
0.0941884	0.933765		0.0941884	0.751697		0.0941884	0.680432		0.0941884	0.562742		0.0941884	0.451056		0.0941884	0.394092		0.0941884	0.36947		0.0941884	0.35015		0.0941884	0.337623
0.0961924	0.935058		0.0961924	0.755881		0.0961924	0.68532		0.0961924	0.567829		0.0961924	0.454726		0.0961924	0.396288		0.0961924	0.370857		0.0961924	0.350825		0.0961924	0.337801
0.0981964	0.936298		0.0981964	0.759924		0.0981964	0.690066		0.0981964	0.572827		0.0981964	0.458389		0.0981964	0.398501		0.0981964	0.372259		0.0981964	0.351511		0.0981964	0.337981
0.1002	0.93749		0.1002	0.763832		0.1002	0.694674		0.1002	0.577737		0.1002	0.462043		0.1002	0.400729		0.1002	0.373678		0.1002	0.352206		0.1002	0.338164
0.102204	0.938636		0.102204	0.767611		0.102204	0.699148		0.102204	0.582558		0.102204	0.465687		0.102204	0.402972		0.102204	0.375112		0.102204	0.352911		0.102204	0.338351
0.104208	0.939738		0.104208	0.771268		0.104208	0.703495		0.104208	0.58729		0.104208	0.469318		0.104208	0.405228		0.104208	0.376561		0.104208	0.353626		0.104208	0.33854
0.106212	0.940799		0.106212	0.774807		0.106212	0.707719		0.106212	0.591935		0.106212	0.472935		0.106212	0.407496		0.106212	0.378024		0.106212	0.354351		0.106212	0.338732
0.108216	0.941822		0.108216	0.778235		0.108216	0.711823		0.108216	0.596493		0.108216	0.476535		0.108216	0.409774		0.108216	0.3795		0.108216	0.355085		0.108216	0.338928
0.11022	0.942807		0.11022	0.781555		0.11022	0.715812		0.11022	0.600965		0.11022	0.480118		0.11022	0.412062		0.11022	0.380989		0.11022	0.355828		0.11022	0.339126
0.112224	0.943758		0.112224	0.784773		0.112224	0.719691		0.112224	0.605352		0.112224	0.483681		0.112224	0.414359		0.112224	0.38249		0.112224	0.356579		0.112224	0.339327
0.114228	0.944675		0.114228	0.787892		0.114228	0.723464		0.114228	0.609655		0.114228	0.487223		0.114228	0.416664		0.114228	0.384002		0.114228	0.35734		0.114228	0.339531
0.116232	0.945561		0.116232	0.790918		0.116232	0.727133		0.116232	0.613875		0.116232	0.490743		0.116232	0.418974		0.116232	0.385526		0.116232	0.358109		0.116232	0.339738
0.118236	0.946417		0.118236	0.793853		0.118236	0.730703		0.118236	0.618014		0.118236	0.49424		0.118236	0.421291		0.118236	0.38706		0.118236	0.358886		0.118236	0.339947
0.12024	0.947244		0.12024	0.796702		0.12024	0.734177		0.12024	0.622071		0.12024	0.497712		0.12024	0.423611		0.12024	0.388604		0.12024	0.359671		0.12024	0.340159
0.122244	0.948045		0.122244	0.799468		0.122244	0.73756		0.122244	0.62605		0.122244	0.501159		0.122244	0.425936		0.122244	0.390158		0.122244	0.360463		0.122244	0.340374
0.124248	0.948819		0.124248	0.802155		0.124248	0.740852		0.124248	0.629951		0.124248	0.504579		0.124248	0.428262		0.124248	0.39172		0.124248	0.361264		0.124248	0.340591
0.126253	0.949569		0.126253	0.804766		0.126253	0.744059		0.126253	0.633776		0.126253	0.507972		0.126253	0.430591		0.126253	0.39329		0.126253	0.362071		0.126253	0.340811
0.128257	0.950295		0.128257	0.807303		0.128257	0.747183		0.128257	0.637526		0.128257	0.511336		0.128257	0.43292		0.128257	0.394868		0.128257	0.362886		0.128257	0.341034
0.130261	0.950999		0.130261	0.80977		0.130261	0.750227		0.130261	0.641202		0.130261	0.514672		0.130261	0.435249		0.130261	0.396453		0.130261	0.363707		0.130261	0.341259
0.132265	0.951682		0.132265	0.812169		0.132265	0.753193		0.132265	0.644806		0.132265	0.517977		0.132265	0.437577		0.132265	0.398044		0.132265	0.364535		0.132265	0.341486
0.134269	0.952343		0.134269	0.814503		0.134269	0.756085		0.134269	0.648339		0.134269	0.521253		0.134269	0.439904		0.134269	0.399642		0.134269	0.36537		0.134269	0.341716
0.136273	0.952986		0.136273	0.816774		0.136273	0.758904		0.136273	0.651802		0.136273	0.524497		0.136273	0.442228		0.136273	0.401245		0.136273	0.36621		0.136273	0.341948
0.138277	0.953609		0.138277	0.818985		0.138277	0.761653		0.138277	0.655198		0.138277	0.52771		0.138277	0.444548		0.138277	0.402853		0.138277	0.367057		0.138277	0.342182
0.140281	0.954214		0.140281	0.821137		0.140281	0.764335		0.140281	0.658527		0.140281	0.530892		0.140281	0.446865		0.140281	0.404465		0.140281	0.367909		0.140281	0.342419
0.142285	0.954802		0.142285	0.823234		0.142285	0.766952		0.142285	0.661791		0.142285	0.534041		0.142285	0.449177		0.142285	0.406081		0.142285	0.368767		0.142285	0.342658
0.144289	0.955374		0.144289	0.825277		0.144289	0.769505		0.144289	0.664991		0.144289	0.537158		0.144289	0.451484		0.144289	0.407701		0.144289	0.369631		0.144289	0.342899
0.146293	0.955929		0.146293	0.827267		0.146293	0.771997		0.146293	0.668129		0.146293	0.540242		0.146293	0.453784		0.146293	0.409324		0.146293	0.370499		0.146293	0.343142
0.148297	0.956469		0.148297	0.829208		0.148297	0.77443		0.148297	0.671205		0.148297	0.543293		0.148297	0.456078		0.148297	0.410949		0.148297	0.371372		0.148297	0.343388
0.150301	0.956994		0.150301	0.8311		0.150301	0.776806		0.150301	0.674222		0.150301	0.54631		0.150301	0.458365		0.150301	0.412576		0.150301	0.37225		0.150301	0.343635
0.152305	0.957506		0.152305	0.832945		0.152305	0.779126		0.152305	0.677181		0.152305	0.549295		0.152305	0.460644		0.152305	0.414205		0.152305	0.373133		0.152305	0.343885
0.154309	0.958003		0.154309	0.834745		0.154309	0.781392		0.154309	0.680082		0.154309	0.552246		0.154309	0.462914		0.154309	0.415835		0.154309	0.374019		0.154309	0.344136
0.156313	0.958488		0.156313	0.836501		0.156313	0.783607		0.156313	0.682927		0.156313	0.555163		0.156313	0.465176		0.156313	0.417466		0.156313	0.37491		0.156313	0.344389
0.158317	0.95896		0.158317	0.838215		0.158317	0.785771		0.158317	0.685718		0.158317	0.558047		0.158317	0.467428		0.158317	0.419097		0.158317	0.375804		0.158317	0.344644
0.160321	0.95942		0.160321	0.839889		0.160321	0.787886		0.160321	0.688455		0.160321	0.560897		0.160321	0.46967		0.160321	0.420728		0.160321	0.376702		0.160321	0.344901
0.162325	0.959868		0.162325	0.841522		0.162325	0.789953		0.162325	0.69114		0.162325	0.563713		0.162325	0.471902		0.162325	0.422359		0.162325	0.377604		0.162325	0.34516
0.164329	0.960304		0.164329	0.843118		0.164329	0.791975		0.164329	0.693774		0.164329	0.566496		0.164329	0.474123		0.164329	0.423988		0.164329	0.378508		0.164329	0.34542
0.166333	0.96073		0.166333	0.844676		0.166333	0.793952		0.166333	0.696358		0.166333	0.569246		0.166333	0.476332		0.166333	0.425617		0.166333	0.379416		0.166333	0.345682
0.168337	0.961145		0.168337	0.846199		0.168337	0.795885		0.168337	0.698893		0.168337	0.571962		0.168337	0.47853		0.168337	0.427243		0.168337	0.380326		0.168337	0.345946
0.170341	0.96155		0.170341	0.847687		0.170341	0.797777		0.170341	0.701381		0.170341	0.574645		0.170341	0.480716		0.170341	0.428868		0.170341	0.381239		0.170341	0.346211
0.172345	0.961946		0.172345	0.849141		0.172345	0.799627		0.172345	0.703822		0.172345	0.577295		0.172345	0.48289		0.172345	0.43049		0.172345	0.382155		0.172345	0.346478
0.174349	0.962332		0.174349	0.850563		0.174349	0.801438		0.174349	0.706217		0.174349	0.579912		0.174349	0.48505		0.174349	0.432109		0.174349	0.383072		0.174349	0.346746
0.176353	0.962708		0.176353	0.851953		0.176353	0.803211		0.176353	0.708567		0.176353	0.582496		0.176353	0.487198		0.176353	0.433725		0.176353	0.383992		0.176353	0.347016
0.178357	0.963076		0.178357	0.853313		0.178357	0.804945		0.178357	0.710874		0.178357	0.585048		0.178357	0.489332		0.178357	0.435338		0.178357	0.384913		0.178357	0.347287
0.180361	0.963435		0.180361	0.854643		0.180361	0.806644		0.180361	0.713139		0.180361	0.587567		0.180361	0.491453		0.180361	0.436947		0.180361	0.385836		0.180361	0.347559
0.182365	0.963786		0.182365	0.855943		0.182365	0.808307		0.182365	0.715362		0.182365	0.590054		0.182365	0.493559		0.182365	0.438552		0.182365	0.38676		0.182365	0.347833
0.184369	0.964129		0.184369	0.857216		0.184369	0.809936		0.184369	0.717544		0.184369	0.592509		0.184369	0.495651		0.184369	0.440152		0.184369	0.387685		0.184369	0.348108
0.186373	0.964464		0.186373	0.858462		0.186373	0.811531		0.186373	0.719686		0.186373	0.594932		0.186373	0.497729		0.186373	0.441748		0.186373	0.388612		0.186373	0.348384
0.188377	0.964791		0.188377	0.859681		0.188377	0.813094		0.188377	0.721789		0.188377	0.597324		0.188377	0.499792		0.188377	0.443339		0.188377	0.389539		0.188377	0.348661
0.190381	0.965111		0.190381	0.860875		0.190381	0.814625		0.190381	0.723854		0.190381	0.599685		0.190381	0.501841		0.190381	0.444924		0.190381	0.390467		0.190381	0.348939
0.192385	0.965424		0.192385	0.862043		0.192385	0.816125		0.192385	0.725882		0.192385	0.602014		0.192385	0.503874		0.192385	0.446504		0.192385	0.391396		0.192385	0.349218
0.194389	0.965731		0.194389	0.863188		0.194389	0.817595		0.194389	0.727873		0.194389	0.604314		0.194389	0.505891		0.194389	0.448078		0.194389	0.392325		0.194389	0.349499
0.196393	0.96603		0.196393	0.864309		0.196393	0.819036		0.196393	0.729828		0.196393	0.606582		0.196393	0.507894		0.196393	0.449647		0.196393	0.393254		0.196393	0.34978
0.198397	0.966323		0.198397	0.865406		0.198397	0.820448		0.198397	0.731749		0.198397	0.608821		0.198397	0.50988		0.198397	0.451208		0.198397	0.394182		0.198397	0.350062
0.200401	0.96661		0.200401	0.866482		0.200401	0.821833		0.200401	0.733635		0.200401	0.61103		0.200401	0.511851		0.200401	0.452764		0.200401	0.395111		0.200401	0.350345
0.202405	0.96689		0.202405	0.867536		0.202405	0.82319		0.202405	0.735488		0.202405	0.613209		0.202405	0.513806		0.202405	0.454312		0.202405	0.396039		0.202405	0.350629
0.204409	0.967165		0.204409	0.868568		0.204409	0.824521		0.204409	0.737309		0.204409	0.615359		0.204409	0.515745		0.204409	0.455853		0.204409	0.396967		0.204409	0.350913
0.206413	0.967434		0.206413	0.86958		0.206413	0.825827		0.206413	0.739097		0.206413	0.61748		0.206413	0.517667		0.206413	0.457388		0.206413	0.397894		0.206413	0.351198
0.208417	0.967697		0.208417	0.870572		0.208417	0.827107		0.208417	0.740854		0.208417	0.619573		0.208417	0.519574		0.208417	0.458914		0.208417	0.39882		0.208417	0.351484
0.210421	0.967955		0.210421	0.871544		0.210421	0.828363		0.210421	0.74258		0.210421	0.621637		0.210421	0.521464		0.210421	0.460434		0.210421	0.399745		0.210421	0.351771
0.212425	0.968207		0.212425	0.872498		0.212425	0.829595		0.212425	0.744276		0.212425	0.623673		0.212425	0.523337		0.212425	0.461945		0.212425	0.400669		0.212425	0.352058
0.214429	0.968454		0.214429	0.873432		0.214429	0.830803		0.214429	0.745943		0.214429	0.625682		0.214429	0.525194		0.214429	0.463448		0.214429	0.401592		0.214429	0.352345
0.216433	0.968697		0.216433	0.874349		0.216433	0.831989		0.216433	0.747581		0.216433	0.627663		0.216433	0.527035		0.216433	0.464943		0.216433	0.402513		0.216433	0.352633
0.218437	0.968934		0.218437	0.875248		0.218437	0.833153		0.218437	0.74919		0.218437	0.629617		0.218437	0.528858		0.218437	0.46643		0.218437	0.403432		0.218437	0.352921
0.220441	0.969167		0.220441	0.876129		0.220441	0.834295		0.220441	0.750772		0.220441	0.631545		0.220441	0.530665		0.220441	0.467908		0.220441	0.40435		0.220441	0.35321
0.222445	0.969395		0.222445	0.876994		0.222445	0.835416		0.222445	0.752327		0.222445	0.633446		0.222445	0.532456		0.222445	0.469378		0.222445	0.405265		0.222445	0.353499
0.224449	0.969618		0.224449	0.877843		0.224449	0.836516		0.224449	0.753856		0.224449	0.635321		0.224449	0.534229		0.224449	0.470838		0.224449	0.406179		0.224449	0.353789
0.226453	0.969837		0.226453	0.878675		0.226453	0.837596		0.226453	0.755358		0.226453	0.63717		0.226453	0.535986		0.226453	0.47229		0.226453	0.40709		0.226453	0.354078
0.228457	0.970052		0.228457	0.879492		0.228457	0.838656		0.228457	0.756835		0.228457	0.638993		0.228457	0.537726		0.228457	0.473732		0.228457	0.407999		0.228457	0.354368
0.230461	0.970262		0.230461	0.880294		0.230461	0.839697		0.230461	0.758286		0.230461	0.640791		0.230461	0.539449		0.230461	0.475166		0.230461	0.408905		0.230461	0.354658
0.232465	0.970469		0.232465	0.881081		0.232465	0.840719		0.232465	0.759714		0.232465	0.642565		0.232465	0.541156		0.232465	0.476589		0.232465	0.409809		0.232465	0.354947
0.234469	0.970671		0.234469	0.881853		0.234469	0.841723		0.234469	0.761117		0.234469	0.644314		0.234469	0.542845		0.234469	0.478004		0.234469	0.41071		0.234469	0.355237
0.236473	0.97087		0.236473	0.882611		0.236473	0.842709		0.236473	0.762497		0.236473	0.646038		0.236473	0.544518		0.236473	0.479408		0.236473	0.411608		0.236473	0.355527
0.238477	0.971065		0.238477	0.883355		0.238477	0.843677		0.238477	0.763853		0.238477	0.647739		0.238477	0.546174		0.238477	0.480803		0.238477	0.412503		0.238477	0.355817
0.240481	0.971256		0.240481	0.884085		0.240481	0.844627		0.240481	0.765187		0.240481	0.649416		0.240481	0.547813		0.240481	0.482188		0.240481	0.413394		0.240481	0.356107
0.242485	0.971443		0.242485	0.884803		0.242485	0.845561		0.242485	0.766499		0.242485	0.651069		0.242485	0.549436		0.242485	0.483563		0.242485	0.414283		0.242485	0.356396
0.244489	0.971627		0.244489	0.885507		0.244489	0.846478		0.244489	0.767789		0.244489	0.652699		0.244489	0.551041		0.244489	0.484928		0.244489	0.415168		0.244489	0.356686
0.246493	0.971808		0.246493	0.886198		0.246493	0.847379		0.246493	0.769057		0.246493	0.654307		0.246493	0.55263		0.246493	0.486282		0.246493	0.416049		0.246493	0.356975
0.248497	0.971985		0.248497	0.886877		0.248497	0.848265		0.248497	0.770305		0.248497	0.655891		0.248497	0.554203		0.248497	0.487627		0.248497	0.416927		0.248497	0.357264
0.250501	0.972159		0.250501	0.887544		0.250501	0.849134		0.250501	0.771532		0.250501	0.657454		0.250501	0.555758		0.250501	0.488961		0.250501	0.417801		0.250501	0.357552
0.252505	0.97233		0.252505	0.888199		0.252505	0.849989		0.252505	0.772738		0.252505	0.658995		0.252505	0.557297		0.252505	0.490284		0.252505	0.418672		0.252505	0.35784
0.254509	0.972497		0.254509	0.888842		0.254509	0.850828		0.254509	0.773925		0.254509	0.660513		0.254509	0.55882		0.254509	0.491597		0.254509	0.419538		0.254509	0.358128
0.256513	0.972661		0.256513	0.889474		0.256513	0.851653		0.256513	0.775093		0.256513	0.662011		0.256513	0.560326		0.256513	0.4929		0.256513	0.4204		0.256513	0.358415
0.258517	0.972823		0.258517	0.890095		0.258517	0.852464		0.258517	0.776241		0.258517	0.663487		0.258517	0.561816		0.258517	0.494191		0.258517	0.421258		0.258517	0.358702
0.260521	0.972981		0.260521	0.890705		0.260521	0.853261		0.260521	0.77737		0.260521	0.664942		0.260521	0.563289		0.260521	0.495473		0.260521	0.422112		0.260521	0.358988
0.262525	0.973137		0.262525	0.891304		0.262525	0.854044		0.262525	0.778481		0.262525	0.666376		0.262525	0.564746		0.262525	0.496743		0.262525	0.422961		0.262525	0.359273
0.264529	0.97329		0.264529	0.891892		0.264529	0.854813		0.264529	0.779574		0.264529	0.667791		0.264529	0.566186		0.264529	0.498002		0.264529	0.423806		0.264529	0.359558
0.266533	0.97344		0.266533	0.892471		0.266533	0.85557		0.266533	0.780648		0.266533	0.669185		0.266533	0.567611		0.266533	0.499251		0.266533	0.424646		0.266533	0.359843
0.268537	0.973587		0.268537	0.893039		0.268537	0.856313		0.268537	0.781706		0.268537	0.670559		0.268537	0.569019		0.268537	0.500488		0.268537	0.425482		0.268537	0.360126
0.270541	0.973732		0.270541	0.893597		0.270541	0.857043		0.270541	0.782746		0.270541	0.671913		0.270541	0.570412		0.270541	0.501715		0.270541	0.426312		0.270541	0.360409
0.272545	0.973874		0.272545	0.894146		0.272545	0.857762		0.272545	0.783769		0.272545	0.673248		0.272545	0.571788		0.272545	0.502931		0.272545	0.427138		0.272545	0.36069
0.274549	0.974013		0.274549	0.894685		0.274549	0.858468		0.274549	0.784776		0.274549	0.674564		0.274549	0.573148		0.274549	0.504135		0.274549	0.427959		0.274549	0.360971
0.276553	0.97415		0.276553	0.895214		0.276553	0.859161		0.276553	0.785766		0.276553	0.67586		0.276553	0.574493		0.276553	0.505329		0.276553	0.428775		0.276553	0.361252
0.278557	0.974285		0.278557	0.895735		0.278557	0.859844		0.278557	0.78674		0.278557	0.677138		0.278557	0.575822		0.278557	0.506511		0.278557	0.429586		0.278557	0.361531
0.280561	0.974417		0.280561	0.896247		0.280561	0.860514		0.280561	0.787698		0.280561	0.678398		0.280561	0.577135		0.280561	0.507682		0.280561	0.430391		0.280561	0.361809
0.282565	0.974547		0.282565	0.896749		0.282565	0.861173		0.282565	0.788641		0.282565	0.679639		0.282565	0.578432		0.282565	0.508842		0.282565	0.431191		0.282565	0.362086
0.284569	0.974674		0.284569	0.897244		0.284569	0.861821		0.284569	0.789569		0.284569	0.680863		0.284569	0.579714		0.284569	0.509991		0.284569	0.431986		0.284569	0.362362
0.286573	0.9748		0.286573	0.897729		0.286573	0.862458		0.286573	0.790481		0.286573	0.682068		0.286573	0.580981		0.286573	0.511128		0.286573	0.432775		0.286573	0.362637
0.288577	0.974923		0.288577	0.898207		0.288577	0.863085		0.288577	0.791379		0.288577	0.683256		0.288577	0.582232		0.288577	0.512255		0.288577	0.433559		0.288577	0.362911
0.290581	0.975044		0.290581	0.898676		0.290581	0.8637		0.290581	0.792262		0.290581	0.684426		0.290581	0.583468		0.290581	0.513369		0.290581	0.434337		0.290581	0.363183
0.292585	0.975163		0.292585	0.899137		0.292585	0.864306		0.292585	0.79313		0.292585	0.685579		0.292585	0.584688		0.292585	0.514473		0.292585	0.43511		0.292585	0.363455
0.294589	0.975279		0.294589	0.89959		0.294589	0.864901		0.294589	0.793985		0.294589	0.686716		0.294589	0.585894		0.294589	0.515565		0.294589	0.435876		0.294589	0.363725
0.296593	0.975394		0.296593	0.900035		0.296593	0.865486		0.296593	0.794826		0.296593	0.687835		0.296593	0.587084		0.296593	0.516646		0.296593	0.436637		0.296593	0.363994
0.298597	0.975507		0.298597	0.900473		0.298597	0.866061		0.298597	0.795652		0.298597	0.688938		0.298597	0.58826		0.298597	0.517716		0.298597	0.437392		0.298597	0.364261
0.300601	0.975617		0.300601	0.900903		0.300601	0.866626		0.300601	0.796466		0.300601	0.690025		0.300601	0.589421		0.300601	0.518774		0.300601	0.438141		0.300601	0.364527
0.302605	0.975726		0.302605	0.901326		0.302605	0.867182		0.302605	0.797266		0.302605	0.691095		0.302605	0.590566		0.302605	0.519821		0.302605	0.438885		0.302605	0.364792
0.304609	0.975833		0.304609	0.901742		0.304609	0.867729		0.304609	0.798053		0.304609	0.692149		0.304609	0.591698		0.304609	0.520857		0.304609	0.439621		0.304609	0.365055
0.306613	0.975938		0.306613	0.902151		0.306613	0.868266		0.306613	0.798828		0.306613	0.693187		0.306613	0.592814		0.306613	0.521881		0.306613	0.440352		0.306613	0.365317
0.308617	0.976041		0.308617	0.902552		0.308617	0.868794		0.308617	0.799589		0.308617	0.69421		0.308617	0.593916		0.308617	0.522894		0.308617	0.441077		0.308617	0.365577
0.310621	0.976142		0.310621	0.902947		0.310621	0.869313		0.310621	0.800338		0.310621	0.695217		0.310621	0.595004		0.310621	0.523896		0.310621	0.441795		0.310621	0.365835
0.312625	0.976242		0.312625	0.903335		0.312625	0.869823		0.312625	0.801075		0.312625	0.696209		0.312625	0.596077		0.312625	0.524886		0.312625	0.442507		0.312625	0.366092
0.314629	0.976339		0.314629	0.903716		0.314629	0.870325		0.314629	0.8018		0.314629	0.697186		0.314629	0.597136		0.314629	0.525865		0.314629	0.443213		0.314629	0.366348
0.316633	0.976435		0.316633	0.90409		0.316633	0.870818		0.316633	0.802512		0.316633	0.698148		0.316633	0.59818		0.316633	0.526832		0.316633	0.443912		0.316633	0.366602
0.318637	0.97653		0.318637	0.904458		0.318637	0.871303		0.318637	0.803213		0.318637	0.699095		0.318637	0.599211		0.318637	0.527788		0.318637	0.444605		0.318637	0.366853
0.320641	0.976623		0.320641	0.90482		0.320641	0.871779		0.320641	0.803902		0.320641	0.700028		0.320641	0.600228		0.320641	0.528733		0.320641	0.445291		0.320641	0.367104
0.322645	0.976714		0.322645	0.905176		0.322645	0.872247		0.322645	0.80458		0.322645	0.700946		0.322645	0.60123		0.322645	0.529667		0.322645	0.445971		0.322645	0.367352
0.324649	0.976803		0.324649	0.905525		0.324649	0.872708		0.324649	0.805246		0.324649	0.701849		0.324649	0.602219		0.324649	0.530589		0.324649	0.446644		0.324649	0.367599
0.326653	0.976891		0.326653	0.905868		0.326653	0.87316		0.326653	0.805901		0.326653	0.702739		0.326653	0.603194		0.326653	0.5315		0.326653	0.44731		0.326653	0.367844
0.328657	0.976977		0.328657	0.906206		0.328657	0.873604		0.328657	0.806546		0.328657	0.703614		0.328657	0.604155		0.328657	0.5324		0.328657	0.44797		0.328657	0.368087
0.330661	0.977062		0.330661	0.906537		0.330661	0.874041		0.330661	0.807179		0.330661	0.704476		0.330661	0.605103		0.330661	0.533288		0.330661	0.448622		0.330661	0.368328
0.332665	0.977145		0.332665	0.906863		0.332665	0.87447		0.332665	0.807802		0.332665	0.705324		0.332665	0.606037		0.332665	0.534165		0.332665	0.449269		0.332665	0.368567
0.334669	0.977227		0.334669	0.907182		0.334669	0.874892		0.334669	0.808414		0.334669	0.706158		0.334669	0.606958		0.334669	0.535031		0.334669	0.449908		0.334669	0.368804
0.336673	0.977307		0.336673	0.907497		0.336673	0.875306		0.336673	0.809015		0.336673	0.706979		0.336673	0.607865		0.336673	0.535886		0.336673	0.45054		0.336673	0.369039
0.338677	0.977386		0.338677	0.907805		0.338677	0.875713		0.338677	0.809606		0.338677	0.707787		0.338677	0.608759		0.338677	0.536729		0.338677	0.451165		0.338677	0.369272
0.340681	0.977464		0.340681	0.908108		0.340681	0.876113		0.340681	0.810187		0.340681	0.708582		0.340681	0.60964		0.340681	0.537561		0.340681	0.451784		0.340681	0.369503
0.342685	0.97754		0.342685	0.908406		0.342685	0.876506		0.342685	0.810758		0.342685	0.709363		0.342685	0.610508		0.342685	0.538382		0.342685	0.452395		0.342685	0.369732
0.344689	0.977614		0.344689	0.908698		0.344689	0.876892		0.344689	0.811319		0.344689	0.710132		0.344689	0.611363		0.344689	0.539192		0.344689	0.452999		0.344689	0.369959
0.346693	0.977687		0.346693	0.908985		0.346693	0.877271		0.346693	0.811871		0.346693	0.710887		0.346693	0.612204		0.346693	0.539991		0.346693	0.453597		0.346693	0.370183
0.348697	0.977759		0.348697	0.909267		0.348697	0.877643		0.348697	0.812412		0.348697	0.711631		0.348697	0.613033		0.348697	0.540779		0.348697	0.454187		0.348697	0.370406
0.350701	0.97783		0.350701	0.909544		0.350701	0.878008		0.350701	0.812944		0.350701	0.712361		0.350701	0.613849		0.350701	0.541555		0.350701	0.45477		0.350701	0.370626
0.352705	0.977899		0.352705	0.909816		0.352705	0.878367		0.352705	0.813467		0.352705	0.71308		0.352705	0.614653		0.352705	0.542321		0.352705	0.455346		0.352705	0.370844
0.354709	0.977967		0.354709	0.910082		0.354709	0.878719		0.354709	0.81398		0.354709	0.713786		0.354709	0.615443		0.354709	0.543075		0.354709	0.455914		0.354709	0.37106
0.356713	0.978034		0.356713	0.910344		0.356713	0.879065		0.356713	0.814484		0.356713	0.714479		0.356713	0.616221		0.356713	0.543818		0.356713	0.456475		0.356713	0.371273
0.358717	0.978099		0.358717	0.910601		0.358717	0.879404		0.358717	0.814978		0.358717	0.715161		0.358717	0.616987		0.358717	0.544551		0.358717	0.45703		0.358717	0.371484
0.360721	0.978164		0.360721	0.910853		0.360721	0.879737		0.360721	0.815464		0.360721	0.715831		0.360721	0.61774		0.360721	0.545272		0.360721	0.457576		0.360721	0.371693
0.362725	0.978227		0.362725	0.9111		0.362725	0.880064		0.362725	0.815941		0.362725	0.716489		0.362725	0.61848		0.362725	0.545983		0.362725	0.458116		0.362725	0.371899
0.364729	0.978288		0.364729	0.911343		0.364729	0.880384		0.364729	0.816409		0.364729	0.717135		0.364729	0.619209		0.364729	0.546682		0.364729	0.458648		0.364729	0.372103
0.366733	0.978349		0.366733	0.911581		0.366733	0.880699		0.366733	0.816868		0.366733	0.71777		0.366733	0.619925		0.366733	0.547371		0.366733	0.459173		0.366733	0.372305
0.368737	0.978408		0.368737	0.911814		0.368737	0.881007		0.368737	0.817318		0.368737	0.718393		0.368737	0.620628		0.368737	0.548048		0.368737	0.45969		0.368737	0.372504
0.370741	0.978467		0.370741	0.912043		0.370741	0.88131		0.370741	0.81776		0.370741	0.719005		0.370741	0.62132		0.370741	0.548715		0.370741	0.4602		0.370741	0.3727
0.372745	0.978524		0.372745	0.912267		0.372745	0.881607		0.372745	0.818194		0.372745	0.719605		0.372745	0.622		0.372745	0.549371		0.372745	0.460702		0.372745	0.372894
0.374749	0.97858		0.374749	0.912487		0.374749	0.881897		0.374749	0.818619		0.374749	0.720194		0.374749	0.622668		0.374749	0.550016		0.374749	0.461197		0.374749	0.373086
0.376754	0.978634		0.376754	0.912703		0.376754	0.882182		0.376754	0.819035		0.376754	0.720772		0.376754	0.623324		0.376754	0.55065		0.376754	0.461685		0.376754	0.373275
0.378758	0.978688		0.378758	0.912914		0.378758	0.882462		0.378758	0.819444		0.378758	0.721339		0.378758	0.623967		0.378758	0.551273		0.378758	0.462164		0.378758	0.373461
0.380762	0.978741		0.380762	0.913121		0.380762	0.882735		0.380762	0.819844		0.380762	0.721895		0.380762	0.6246		0.380762	0.551886		0.380762	0.462637		0.380762	0.373645
0.382766	0.978792		0.382766	0.913324		0.382766	0.883004		0.382766	0.820237		0.382766	0.722441		0.382766	0.62522		0.382766	0.552488		0.382766	0.463102		0.382766	0.373826
0.38477	0.978843		0.38477	0.913522		0.38477	0.883266		0.38477	0.820621		0.38477	0.722975		0.38477	0.625829		0.38477	0.553079		0.38477	0.463559		0.38477	0.374005
0.386774	0.978892		0.386774	0.913717		0.386774	0.883523		0.386774	0.820997		0.386774	0.723499		0.386774	0.626426		0.386774	0.55366		0.386774	0.464009		0.386774	0.37418
0.388778	0.97894		0.388778	0.913907		0.388778	0.883775		0.388778	0.821366		0.388778	0.724012		0.388778	0.627012		0.388778	0.55423		0.388778	0.464451		0.388778	0.374354
0.390782	0.978988		0.390782	0.914093		0.390782	0.884021		0.390782	0.821727		0.390782	0.724514		0.390782	0.627586		0.390782	0.554789		0.390782	0.464885		0.390782	0.374524
0.392786	0.979034		0.392786	0.914275		0.392786	0.884262		0.392786	0.82208		0.392786	0.725006		0.392786	0.628149		0.392786	0.555337		0.392786	0.465312		0.392786	0.374692
0.39479	0.979079		0.39479	0.914453		0.39479	0.884498		0.39479	0.822425		0.39479	0.725488		0.39479	0.6287		0.39479	0.555875		0.39479	0.465731		0.39479	0.374857
0.396794	0.979123		0.396794	0.914627		0.396794	0.884729		0.396794	0.822763		0.396794	0.72596		0.396794	0.62924		0.396794	0.556403		0.396794	0.466142		0.396794	0.375019
0.398798	0.979166		0.398798	0.914798		0.398798	0.884954		0.398798	0.823094		0.398798	0.726421		0.398798	0.629769		0.398798	0.55692		0.398798	0.466546		0.398798	0.375178
0.400802	0.979209		0.400802	0.914964		0.400802	0.885174		0.400802	0.823417		0.400802	0.726872		0.400802	0.630286		0.400802	0.557426		0.400802	0.466942		0.400802	0.375335
0.402806	0.97925		0.402806	0.915126		0.402806	0.885389		0.402806	0.823732		0.402806	0.727313		0.402806	0.630792		0.402806	0.557922		0.402806	0.46733		0.402806	0.375489
0.40481	0.97929		0.40481	0.915285		0.40481	0.8856		0.40481	0.82404		0.40481	0.727744		0.40481	0.631288		0.40481	0.558407		0.40481	0.46771		0.40481	0.37564
0.406814	0.979329		0.406814	0.91544		0.406814	0.885805		0.406814	0.824341		0.406814	0.728165		0.406814	0.631772		0.406814	0.558882		0.406814	0.468083		0.406814	0.375788
0.408818	0.979368		0.408818	0.915591		0.408818	0.886005		0.408818	0.824635		0.408818	0.728576		0.408818	0.632245		0.408818	0.559346		0.408818	0.468448		0.408818	0.375933
0.410822	0.979405		0.410822	0.915739		0.410822	0.8862		0.410822	0.824922		0.410822	0.728977		0.410822	0.632707		0.410822	0.5598		0.410822	0.468805		0.410822	0.376075
0.412826	0.979442		0.412826	0.915882		0.412826	0.886391		0.412826	0.825202		0.412826	0.729369		0.412826	0.633158		0.412826	0.560244		0.412826	0.469155		0.412826	0.376214
0.41483	0.979477		0.41483	0.916023		0.41483	0.886576		0.41483	0.825474		0.41483	0.72975		0.41483	0.633598		0.41483	0.560677		0.41483	0.469496		0.41483	0.376351
0.416834	0.979512		0.416834	0.916159		0.416834	0.886757		0.416834	0.82574		0.416834	0.730122		0.416834	0.634028		0.416834	0.5611		0.416834	0.46983		0.416834	0.376484
0.418838	0.979545		0.418838	0.916292		0.418838	0.886933		0.418838	0.825998		0.418838	0.730485		0.418838	0.634446		0.418838	0.561512		0.418838	0.470156		0.418838	0.376615
0.420842	0.979578		0.420842	0.916421		0.420842	0.887104		0.420842	0.82625		0.420842	0.730838		0.420842	0.634854		0.420842	0.561914		0.420842	0.470474		0.420842	0.376742
0.422846	0.97961		0.422846	0.916547		0.422846	0.887271		0.422846	0.826495		0.422846	0.731181		0.422846	0.635251		0.422846	0.562306		0.422846	0.470784		0.422846	0.376867
0.42485	0.979641		0.42485	0.916669		0.42485	0.887433		0.42485	0.826733		0.42485	0.731516		0.42485	0.635638		0.42485	0.562687		0.42485	0.471087		0.42485	0.376988
0.426854	0.979671		0.426854	0.916788		0.426854	0.88759		0.426854	0.826964		0.426854	0.73184		0.426854	0.636014		0.426854	0.563058		0.426854	0.471381		0.426854	0.377107
0.428858	0.9797		0.428858	0.916903		0.428858	0.887743		0.428858	0.827188		0.428858	0.732156		0.428858	0.636379		0.428858	0.563419		0.428858	0.471668		0.428858	0.377222
0.430862	0.979729		0.430862	0.917015		0.430862	0.887891		0.430862	0.827406		0.430862	0.732462		0.430862	0.636734		0.430862	0.56377		0.430862	0.471947		0.430862	0.377335
0.432866	0.979756		0.432866	0.917123		0.432866	0.888035		0.432866	0.827618		0.432866	0.732758		0.432866	0.637078		0.432866	0.564111		0.432866	0.472218		0.432866	0.377444
0.43487	0.979783		0.43487	0.917228		0.43487	0.888174		0.43487	0.827822		0.43487	0.733046		0.43487	0.637412		0.43487	0.564441		0.43487	0.472481		0.43487	0.37755
0.436874	0.979808		0.436874	0.91733		0.436874	0.888309		0.436874	0.82802		0.436874	0.733325		0.436874	0.637735		0.436874	0.564761		0.436874	0.472736		0.436874	0.377653
0.438878	0.979833		0.438878	0.917428		0.438878	0.888439		0.438878	0.828212		0.438878	0.733594		0.438878	0.638047		0.438878	0.565071		0.438878	0.472983		0.438878	0.377753
0.440882	0.979857		0.440882	0.917523		0.440882	0.888564		0.440882	0.828397		0.440882	0.733854		0.440882	0.63835		0.440882	0.565371		0.440882	0.473222		0.440882	0.37785
0.442886	0.97988		0.442886	0.917614		0.442886	0.888686		0.442886	0.828575		0.442886	0.734105		0.442886	0.638642		0.442886	0.56566		0.442886	0.473454		0.442886	0.377944
0.44489	0.979903		0.44489	0.917703		0.44489	0.888803		0.44489	0.828747		0.44489	0.734348		0.44489	0.638923		0.44489	0.56594		0.44489	0.473677		0.44489	0.378035
0.446894	0.979924		0.446894	0.917787		0.446894	0.888915		0.446894	0.828913		0.446894	0.734581		0.446894	0.639195		0.446894	0.566209		0.446894	0.473893		0.446894	0.378122
0.448898	0.979945		0.448898	0.917869		0.448898	0.889024		0.448898	0.829072		0.448898	0.734805		0.448898	0.639456		0.448898	0.566469		0.448898	0.4741		0.448898	0.378207
0.450902	0.979965		0.450902	0.917947		0.450902	0.889127		0.450902	0.829225		0.450902	0.735021		0.450902	0.639707		0.450902	0.566718		0.450902	0.4743		0.450902	0.378288
0.452906	0.979984		0.452906	0.918022		0.452906	0.889227		0.452906	0.829372		0.452906	0.735227		0.452906	0.639947		0.452906	0.566957		0.452906	0.474492		0.452906	0.378366
0.45491	0.980002		0.45491	0.918094		0.45491	0.889322		0.45491	0.829512		0.45491	0.735425		0.45491	0.640178		0.45491	0.567186		0.45491	0.474675		0.45491	0.378441
0.456914	0.980019		0.456914	0.918163		0.456914	0.889413		0.456914	0.829646		0.456914	0.735614		0.456914	0.640398		0.456914	0.567405		0.456914	0.474851		0.456914	0.378512
0.458918	0.980036		0.458918	0.918228		0.458918	0.8895		0.458918	0.829774		0.458918	0.735794		0.458918	0.640608		0.458918	0.567614		0.458918	0.475019		0.458918	0.378581
0.460922	0.980051		0.460922	0.918291		0.460922	0.889583		0.460922	0.829895		0.460922	0.735966		0.460922	0.640808		0.460922	0.567813		0.460922	0.475179		0.460922	0.378646
0.462926	0.980066		0.462926	0.91835		0.462926	0.889661		0.462926	0.830011		0.462926	0.736128		0.462926	0.640998		0.462926	0.568002		0.462926	0.475331		0.462926	0.378708
0.46493	0.98008		0.46493	0.918406		0.46493	0.889735		0.46493	0.83012		0.46493	0.736282		0.46493	0.641177		0.46493	0.568181		0.46493	0.475475		0.46493	0.378767
0.466934	0.980094		0.466934	0.918458		0.466934	0.889805		0.466934	0.830223		0.466934	0.736428		0.466934	0.641347		0.466934	0.56835		0.466934	0.47561		0.466934	0.378823
0.468938	0.980106		0.468938	0.918508		0.468938	0.889871		0.468938	0.83032		0.468938	0.736564		0.468938	0.641506		0.468938	0.568509		0.468938	0.475738		0.468938	0.378875
0.470942	0.980118		0.470942	0.918554		0.470942	0.889932		0.470942	0.83041		0.470942	0.736693		0.470942	0.641656		0.470942	0.568658		0.470942	0.475858		0.470942	0.378924
0.472946	0.980129		0.472946	0.918598		0.472946	0.88999		0.472946	0.830495		0.472946	0.736812		0.472946	0.641795		0.472946	0.568797		0.472946	0.47597		0.472946	0.37897
0.47495	0.980139		0.47495	0.918638		0.47495	0.890043		0.47495	0.830574		0.47495	0.736923		0.47495	0.641925		0.47495	0.568926		0.47495	0.476074		0.47495	0.379012
0.476954	0.980149		0.476954	0.918675		0.476954	0.890092		0.476954	0.830646		0.476954	0.737025		0.476954	0.642044		0.476954	0.569045		0.476954	0.47617		0.476954	0.379052
0.478958	0.980157		0.478958	0.918709		0.478958	0.890137		0.478958	0.830712		0.478958	0.737119		0.478958	0.642154		0.478958	0.569154		0.478958	0.476258		0.478958	0.379088
0.480962	0.980165		0.480962	0.91874		0.480962	0.890178		0.480962	0.830772		0.480962	0.737204		0.480962	0.642253		0.480962	0.569254		0.480962	0.476338		0.480962	0.379121
0.482966	0.980172		0.482966	0.918767		0.482966	0.890215		0.482966	0.830827		0.482966	0.73728		0.482966	0.642342		0.482966	0.569343		0.482966	0.47641		0.482966	0.37915
0.48497	0.980178		0.48497	0.918792		0.48497	0.890248		0.48497	0.830875		0.48497	0.737348		0.48497	0.642422		0.48497	0.569422		0.48497	0.476474		0.48497	0.379176
0.486974	0.980184		0.486974	0.918813		0.486974	0.890276		0.486974	0.830917		0.486974	0.737408		0.486974	0.642492		0.486974	0.569492		0.486974	0.47653		0.486974	0.379199
0.488978	0.980188		0.488978	0.918832		0.488978	0.890301		0.488978	0.830953		0.488978	0.737459		0.488978	0.642551		0.488978	0.569551		0.488978	0.476578		0.488978	0.379219
0.490982	0.980192		0.490982	0.918847		0.490982	0.890321		0.490982	0.830983		0.490982	0.737501		0.490982	0.642601		0.490982	0.569601		0.490982	0.476618		0.490982	0.379236
0.492986	0.980195		0.492986	0.91886		0.492986	0.890337		0.492986	0.831007		0.492986	0.737535		0.492986	0.642641		0.492986	0.56964		0.492986	0.47665		0.492986	0.379249
0.49499	0.980198		0.49499	0.918869		0.49499	0.89035		0.49499	0.831025		0.49499	0.737561		0.49499	0.64267		0.49499	0.56967		0.49499	0.476674		0.49499	0.379259
0.496994	0.980199		0.496994	0.918875		0.496994	0.890358		0.496994	0.831037		0.496994	0.737578		0.496994	0.64269		0.496994	0.56969		0.496994	0.47669		0.496994	0.379265
0.498998	0.9802		0.498998	0.918878		0.498998	0.890362		0.498998	0.831043		0.498998	0.737586		0.498998	0.6427		0.498998	0.5697		0.498998	0.476698		0.498998	0.379268
0.501002	0.9802		0.501002	0.918878		0.501002	0.890362		0.501002	0.831043		0.501002	0.737586		0.501002	0.6427		0.501002	0.5697		0.501002	0.476698		0.501002	0.379268
0.503006	0.980199		0.503006	0.918875		0.503006	0.890358		0.503006	0.831037		0.503006	0.737578		0.503006	0.64269		0.503006	0.56969		0.503006	0.47669		0.503006	0.379265
0.50501	0.980198		0.50501	0.918869		0.50501	0.89035		0.50501	0.831025		0.50501	0.737561		0.50501	0.64267		0.50501	0.56967		0.50501	0.476674		0.50501	0.379259
0.507014	0.980195		0.507014	0.91886		0.507014	0.890337		0.507014	0.831007		0.507014	0.737535		0.507014	0.642641		0.507014	0.56964		0.507014	0.47665		0.507014	0.379249
0.509018	0.980192		0.509018	0.918847		0.509018	0.890321		0.509018	0.830983		0.509018	0.737501		0.509018	0.642601		0.509018	0.569601		0.509018	0.476618		0.509018	0.379236
0.511022	0.980188		0.511022	0.918832		0.511022	0.890301		0.511022	0.830953		0.511022	0.737459		0.511022	0.642551		0.511022	0.569551		0.511022	0.476578		0.511022	0.379219
0.513026	0.980184		0.513026	0.918813		0.513026	0.890276		0.513026	0.830917		0.513026	0.737408		0.513026	0.642492		0.513026	0.569492		0.513026	0.47653		0.513026	0.379199
0.51503	0.980178		0.51503	0.918792		0.51503	0.890248		0.51503	0.830875		0.51503	0.737348		0.51503	0.642422		0.51503	0.569422		0.51503	0.476474		0.51503	0.379176
0.517034	0.980172		0.517034	0.918767		0.517034	0.890215		0.517034	0.830827		0.517034	0.73728		0.517034	0.642342		0.517034	0.569343		0.517034	0.47641		0.517034	0.37915
0.519038	0.980165		0.519038	0.91874		0.519038	0.890178		0.519038	0.830772		0.519038	0.737204		0.519038	0.642253		0.519038	0.569254		0.519038	0.476338		0.519038	0.379121
0.521042	0.980157		0.521042	0.918709		0.521042	0.890137		0.521042	0.830712		0.521042	0.737119		0.521042	0.642154		0.521042	0.569154		0.521042	0.476258		0.521042	0.379088
0.523046	0.980149		0.523046	0.918675		0.523046	0.890092		0.523046	0.830646		0.523046	0.737025		0.523046	0.642044		0.523046	0.569045		0.523046	0.47617		0.523046	0.379052
0.52505	0.980139		0.52505	0.918638		0.52505	0.890043		0.52505	0.830574		0.52505	0.736923		0.52505	0.641925		0.52505	0.568926		0.52505	0.476074		0.52505	0.379012
0.527054	0.980129		0.527054	0.918598		0.527054	0.88999		0.527054	0.830495		0.527054	0.736812		0.527054	0.641795		0.527054	0.568797		0.527054	0.47597		0.527054	0.37897
0.529058	0.980118		0.529058	0.918554		0.529058	0.889932		0.529058	0.83041		0.529058	0.736693		0.529058	0.641656		0.529058	0.568658		0.529058	0.475858		0.529058	0.378924
0.531062	0.980106		0.531062	0.918508		0.531062	0.889871		0.531062	0.83032		0.531062	0.736564		0.531062	0.641506		0.531062	0.568509		0.531062	0.475738		0.531062	0.378875
0.533066	0.980094		0.533066	0.918458		0.533066	0.889805		0.533066	0.830223		0.533066	0.736428		0.533066	0.641347		0.533066	0.56835		0.533066	0.47561		0.533066	0.378823
0.53507	0.98008		0.53507	0.918406		0.53507	0.889735		0.53507	0.83012		0.53507	0.736282		0.53507	0.641177		0.53507	0.568181		0.53507	0.475475		0.53507	0.378767
0.537074	0.980066		0.537074	0.91835		0.537074	0.889661		0.537074	0.830011		0.537074	0.736128		0.537074	0.640998		0.537074	0.568002		0.537074	0.475331		0.537074	0.378708
0.539078	0.980051		0.539078	0.918291		0.539078	0.889583		0.539078	0.829895		0.539078	0.735966		0.539078	0.640808		0.539078	0.567813		0.539078	0.475179		0.539078	0.378646
0.541082	0.980036		0.541082	0.918228		0.541082	0.8895		0.541082	0.829774		0.541082	0.735794		0.541082	0.640608		0.541082	0.567614		0.541082	0.475019		0.541082	0.378581
0.543086	0.980019		0.543086	0.918163		0.543086	0.889413		0.543086	0.829646		0.543086	0.735614		0.543086	0.640398		0.543086	0.567405		0.543086	0.474851		0.543086	0.378512
0.54509	0.980002		0.54509	0.918094		0.54509	0.889322		0.54509	0.829512		0.54509	0.735425		0.54509	0.640178		0.54509	0.567186		0.54509	0.474675		0.54509	0.378441
0.547094	0.979984		0.547094	0.918022		0.547094	0.889227		0.547094	0.829372		0.547094	0.735227		0.547094	0.639947		0.547094	0.566957		0.547094	0.474492		0.547094	0.378366
0.549098	0.979965		0.549098	0.917947		0.549098	0.889127		0.549098	0.829225		0.549098	0.735021		0.549098	0.639707		0.549098	0.566718		0.549098	0.4743		0.549098	0.378288
0.551102	0.979945		0.551102	0.917869		0.551102	0.889024		0.551102	0.829072		0.551102	0.734805		0.551102	0.639456		0.551102	0.566469		0.551102	0.4741		0.551102	0.378207
0.553106	0.979924		0.553106	0.917787		0.553106	0.888915		0.553106	0.828913		0.553106	0.734581		0.553106	0.639195		0.553106	0.566209		0.553106	0.473893		0.553106	0.378122
0.55511	0.979903		0.55511	0.917703		0.55511	0.888803		0.55511	0.828747		0.55511	0.734348		0.55511	0.638923		0.55511	0.56594		0.55511	0.473677		0.55511	0.378035
0.557114	0.97988		0.557114	0.917614		0.557114	0.888686		0.557114	0.828575		0.557114	0.734105		0.557114	0.638642		0.557114	0.56566		0.557114	0.473454		0.557114	0.377944
0.559118	0.979857		0.559118	0.917523		0.559118	0.888564		0.559118	0.828397		0.559118	0.733854		0.559118	0.63835		0.559118	0.565371		0.559118	0.473222		0.559118	0.37785
0.561122	0.979833		0.561122	0.917428		0.561122	0.888439		0.561122	0.828212		0.561122	0.733594		0.561122	0.638047		0.561122	0.565071		0.561122	0.472983		0.561122	0.377753
0.563126	0.979808		0.563126	0.91733		0.563126	0.888309		0.563126	0.82802		0.563126	0.733325		0.563126	0.637735		0.563126	0.564761		0.563126	0.472736		0.563126	0.377653
0.56513	0.979783		0.56513	0.917228		0.56513	0.888174		0.56513	0.827822		0.56513	0.733046		0.56513	0.637412		0.56513	0.564441		0.56513	0.472481		0.56513	0.37755
0.567134	0.979756		0.567134	0.917123		0.567134	0.888035		0.567134	0.827618		0.567134	0.732758		0.567134	0.637078		0.567134	0.564111		0.567134	0.472218		0.567134	0.377444
0.569138	0.979729		0.569138	0.917015		0.569138	0.887891		0.569138	0.827406		0.569138	0.732462		0.569138	0.636734		0.569138	0.56377		0.569138	0.471947		0.569138	0.377335
0.571142	0.9797		0.571142	0.916903		0.571142	0.887743		0.571142	0.827188		0.571142	0.732156		0.571142	0.636379		0.571142	0.563419		0.571142	0.471668		0.571142	0.377222
0.573146	0.979671		0.573146	0.916788		0.573146	0.88759		0.573146	0.826964		0.573146	0.73184		0.573146	0.636014		0.573146	0.563058		0.573146	0.471381		0.573146	0.377107
0.57515	0.979641		0.57515	0.916669		0.57515	0.887433		0.57515	0.826733		0.57515	0.731516		0.57515	0.635638		0.57515	0.562687		0.57515	0.471087		0.57515	0.376988
0.577154	0.97961		0.577154	0.916547		0.577154	0.887271		0.577154	0.826495		0.577154	0.731181		0.577154	0.635251		0.577154	0.562306		0.577154	0.470784		0.577154	0.376867
0.579158	0.979578		0.579158	0.916421		0.579158	0.887104		0.579158	0.82625		0.579158	0.730838		0.579158	0.634854		0.579158	0.561914		0.579158	0.470474		0.579158	0.376742
0.581162	0.979545		0.581162	0.916292		0.581162	0.886933		0.581162	0.825998		0.581162	0.730485		0.581162	0.634446		0.581162	0.561512		0.581162	0.470156		0.581162	0.376615
0.583166	0.979512		0.583166	0.916159		0.583166	0.886757		0.583166	0.82574		0.583166	0.730122		0.583166	0.634028		0.583166	0.5611		0.583166	0.46983		0.583166	0.376484
0.58517	0.979477		0.58517	0.916023		0.58517	0.886576		0.58517	0.825474		0.58517	0.72975		0.58517	0.633598		0.58517	0.560677		0.58517	0.469496		0.58517	0.376351
0.587174	0.979442		0.587174	0.915882		0.587174	0.886391		0.587174	0.825202		0.587174	0.729369		0.587174	0.633158		0.587174	0.560244		0.587174	0.469155		0.587174	0.376214
0.589178	0.979405		0.589178	0.915739		0.589178	0.8862		0.589178	0.824922		0.589178	0.728977		0.589178	0.632707		0.589178	0.5598		0.589178	0.468805		0.589178	0.376075
0.591182	0.979368		0.591182	0.915591		0.591182	0.886005		0.591182	0.824635		0.591182	0.728576		0.591182	0.632245		0.591182	0.559346		0.591182	0.468448		0.591182	0.375933
0.593186	0.979329		0.593186	0.91544		0.593186	0.885805		0.593186	0.824341		0.593186	0.728165		0.593186	0.631772		0.593186	0.558882		0.593186	0.468083		0.593186	0.375788
0.59519	0.97929		0.59519	0.915285		0.59519	0.8856		0.59519	0.82404		0.59519	0.727744		0.59519	0.631288		0.59519	0.558407		0.59519	0.46771		0.59519	0.37564
0.597194	0.97925		0.597194	0.915126		0.597194	0.885389		0.597194	0.823732		0.597194	0.727313		0.597194	0.630792		0.597194	0.557922		0.597194	0.46733		0.597194	0.375489
0.599198	0.979209		0.599198	0.914964		0.599198	0.885174		0.599198	0.823417		0.599198	0.726872		0.599198	0.630286		0.599198	0.557426		0.599198	0.466942		0.599198	0.375335
0.601202	0.979166		0.601202	0.914798		0.601202	0.884954		0.601202	0.823094		0.601202	0.726421		0.601202	0.629769		0.601202	0.55692		0.601202	0.466546		0.601202	0.375178
0.603206	0.979123		0.603206	0.914627		0.603206	0.884729		0.603206	0.822763		0.603206	0.72596		0.603206	0.62924		0.603206	0.556403		0.603206	0.466142		0.603206	0.375019
0.60521	0.979079		0.60521	0.914453		0.60521	0.884498		0.60521	0.822425		0.60521	0.725488		0.60521	0.6287		0.60521	0.555875		0.60521	0.465731		0.60521	0.374857
0.607214	0.979034		0.607214	0.914275		0.607214	0.884262		0.607214	0.82208		0.607214	0.725006		0.607214	0.628149		0.607214	0.555337		0.607214	0.465312		0.607214	0.374692
0.609218	0.978988		0.609218	0.914093		0.609218	0.884021		0.609218	0.821727		0.609218	0.724514		0.609218	0.627586		0.609218	0.554789		0.609218	0.464885		0.609218	0.374524
0.611222	0.97894		0.611222	0.913907		0.611222	0.883775		0.611222	0.821366		0.611222	0.724012		0.611222	0.627012		0.611222	0.55423		0.611222	0.464451		0.611222	0.374354
0.613226	0.978892		0.613226	0.913717		0.613226	0.883523		0.613226	0.820997		0.613226	0.723499		0.613226	0.626426		0.613226	0.55366		0.613226	0.464009		0.613226	0.37418
0.61523	0.978843		0.61523	0.913522		0.61523	0.883266		0.61523	0.820621		0.61523	0.722975		0.61523	0.625829		0.61523	0.553079		0.61523	0.463559		0.61523	0.374005
0.617234	0.978792		0.617234	0.913324		0.617234	0.883004		0.617234	0.820237		0.617234	0.722441		0.617234	0.62522		0.617234	0.552488		0.617234	0.463102		0.617234	0.373826
0.619238	0.978741		0.619238	0.913121		0.619238	0.882735		0.619238	0.819844		0.619238	0.721895		0.619238	0.6246		0.619238	0.551886		0.619238	0.462637		0.619238	0.373645
0.621242	0.978688		0.621242	0.912914		0.621242	0.882462		0.621242	0.819444		0.621242	0.721339		0.621242	0.623967		0.621242	0.551273		0.621242	0.462164		0.621242	0.373461
0.623246	0.978634		0.623246	0.912703		0.623246	0.882182		0.623246	0.819035		0.623246	0.720772		0.623246	0.623324		0.623246	0.55065		0.623246	0.461685		0.623246	0.373275
0.625251	0.97858		0.625251	0.912487		0.625251	0.881897		0.625251	0.818619		0.625251	0.720194		0.625251	0.622668		0.625251	0.550016		0.625251	0.461197		0.625251	0.373086
0.627255	0.978524		0.627255	0.912267		0.627255	0.881607		0.627255	0.818194		0.627255	0.719605		0.627255	0.622		0.627255	0.549371		0.627255	0.460702		0.627255	0.372894
0.629259	0.978467		0.629259	0.912043		0.629259	0.88131		0.629259	0.81776		0.629259	0.719005		0.629259	0.62132		0.629259	0.548715		0.629259	0.4602		0.629259	0.3727
0.631263	0.978408		0.631263	0.911814		0.631263	0.881007		0.631263	0.817318		0.631263	0.718393		0.631263	0.620628		0.631263	0.548048		0.631263	0.45969		0.631263	0.372504
0.633267	0.978349		0.633267	0.911581		0.633267	0.880699		0.633267	0.816868		0.633267	0.71777		0.633267	0.619925		0.633267	0.547371		0.633267	0.459173		0.633267	0.372305
0.635271	0.978288		0.635271	0.911343		0.635271	0.880384		0.635271	0.816409		0.635271	0.717135		0.635271	0.619209		0.635271	0.546682		0.635271	0.458648		0.635271	0.372103
0.637275	0.978227		0.637275	0.9111		0.637275	0.880064		0.637275	0.815941		0.637275	0.716489		0.637275	0.61848		0.637275	0.545983		0.637275	0.458116		0.637275	0.371899
0.639279	0.978164		0.639279	0.910853		0.639279	0.879737		0.639279	0.815464		0.639279	0.715831		0.639279	0.61774		0.639279	0.545272		0.639279	0.457576		0.639279	0.371693
0.641283	0.978099		0.641283	0.910601		0.641283	0.879404		0.641283	0.814978		0.641283	0.715161		0.641283	0.616987		0.641283	0.544551		0.641283	0.45703		0.641283	0.371484
0.643287	0.978034		0.643287	0.910344		0.643287	0.879065		0.643287	0.814484		0.643287	0.714479		0.643287	0.616221		0.643287	0.543818		0.643287	0.456475		0.643287	0.371273
0.645291	0.977967		0.645291	0.910082		0.645291	0.878719		0.645291	0.81398		0.645291	0.713786		0.645291	0.615443		0.645291	0.543075		0.645291	0.455914		0.645291	0.37106
0.647295	0.977899		0.647295	0.909816		0.647295	0.878367		0.647295	0.813467		0.647295	0.71308		0.647295	0.614653		0.647295	0.542321		0.647295	0.455346		0.647295	0.370844
0.649299	0.97783		0.649299	0.909544		0.649299	0.878008		0.649299	0.812944		0.649299	0.712361		0.649299	0.613849		0.649299	0.541555		0.649299	0.45477		0.649299	0.370626
0.651303	0.977759		0.651303	0.909267		0.651303	0.877643		0.651303	0.812412		0.651303	0.711631		0.651303	0.613033		0.651303	0.540779		0.651303	0.454187		0.651303	0.370406
0.653307	0.977687		0.653307	0.908985		0.653307	0.877271		0.653307	0.811871		0.653307	0.710887		0.653307	0.612204		0.653307	0.539991		0.653307	0.453597		0.653307	0.370183
0.655311	0.977614		0.655311	0.908698		0.655311	0.876892		0.655311	0.811319		0.655311	0.710132		0.655311	0.611363		0.655311	0.539192		0.655311	0.452999		0.655311	0.369959
0.657315	0.97754		0.657315	0.908406		0.657315	0.876506		0.657315	0.810758		0.657315	0.709363		0.657315	0.610508		0.657315	0.538382		0.657315	0.452395		0.657315	0.369732
0.659319	0.977464		0.659319	0.908108		0.659319	0.876113		0.659319	0.810187		0.659319	0.708582		0.659319	0.60964		0.659319	0.537561		0.659319	0.451784		0.659319	0.369503
0.661323	0.977386		0.661323	0.907805		0.661323	0.875713		0.661323	0.809606		0.661323	0.707787		0.661323	0.608759		0.661323	0.536729		0.661323	0.451165		0.661323	0.369272
0.663327	0.977307		0.663327	0.907497		0.663327	0.875306		0.663327	0.809015		0.663327	0.706979		0.663327	0.607865		0.663327	0.535886		0.663327	0.45054		0.663327	0.369039
0.665331	0.977227		0.665331	0.907182		0.665331	0.874892		0.665331	0.808414		0.665331	0.706158		0.665331	0.606958		0.665331	0.535031		0.665331	0.449908		0.665331	0.368804
0.667335	0.977145		0.667335	0.906863		0.667335	0.87447		0.667335	0.807802		0.667335	0.705324		0.667335	0.606037		0.667335	0.534165		0.667335	0.449269		0.667335	0.368567
0.669339	0.977062		0.669339	0.906537		0.669339	0.874041		0.669339	0.807179		0.669339	0.704476		0.669339	0.605103		0.669339	0.533288		0.669339	0.448622		0.669339	0.368328
0.671343	0.976977		0.671343	0.906206		0.671343	0.873604		0.671343	0.806546		0.671343	0.703614		0.671343	0.604155		0.671343	0.5324		0.671343	0.44797		0.671343	0.368087
0.673347	0.976891		0.673347	0.905868		0.673347	0.87316		0.673347	0.805901		0.673347	0.702739		0.673347	0.603194		0.673347	0.5315		0.673347	0.44731		0.673347	0.367844
0.675351	0.976803		0.675351	0.905525		0.675351	0.872708		0.675351	0.805246		0.675351	0.701849		0.675351	0.602219		0.675351	0.530589		0.675351	0.446644		0.675351	0.367599
0.677355	0.976714		0.677355	0.905176		0.677355	0.872247		0.677355	0.80458		0.677355	0.700946		0.677355	0.60123		0.677355	0.529667		0.677355	0.445971		0.677355	0.367352
0.679359	0.976623		0.679359	0.90482		0.679359	0.871779		0.679359	0.803902		0.679359	0.700028		0.679359	0.600228		0.679359	0.528733		0.679359	0.445291		0.679359	0.367104
0.681363	0.97653		0.681363	0.904458		0.681363	0.871303		0.681363	0.803213		0.681363	0.699095		0.681363	0.599211		0.681363	0.527788		0.681363	0.444605		0.681363	0.366853
0.683367	0.976435		0.683367	0.90409		0.683367	0.870818		0.683367	0.802512		0.683367	0.698148		0.683367	0.59818		0.683367	0.526832		0.683367	0.443912		0.683367	0.366602
0.685371	0.976339		0.685371	0.903716		0.685371	0.870325		0.685371	0.8018		0.685371	0.697186		0.685371	0.597136		0.685371	0.525865		0.685371	0.443213		0.685371	0.366348
0.687375	0.976242		0.687375	0.903335		0.687375	0.869823		0.687375	0.801075		0.687375	0.696209		0.687375	0.596077		0.687375	0.524886		0.687375	0.442507		0.687375	0.366092
0.689379	0.976142		0.689379	0.902947		0.689379	0.869313		0.689379	0.800338		0.689379	0.695217		0.689379	0.595004		0.689379	0.523896		0.689379	0.441795		0.689379	0.365835
0.691383	0.976041		0.691383	0.902552		0.691383	0.868794		0.691383	0.799589		0.691383	0.69421		0.691383	0.593916		0.691383	0.522894		0.691383	0.441077		0.691383	0.365577
0.693387	0.975938		0.693387	0.902151		0.693387	0.868266		0.693387	0.798828		0.693387	0.693187		0.693387	0.592814		0.693387	0.521881		0.693387	0.440352		0.693387	0.365317
0.695391	0.975833		0.695391	0.901742		0.695391	0.867729		0.695391	0.798053		0.695391	0.692149		0.695391	0.591698		0.695391	0.520857		0.695391	0.439621		0.695391	0.365055
0.697395	0.975726		0.697395	0.901326		0.697395	0.867182		0.697395	0.797266		0.697395	0.691095		0.697395	0.590566		0.697395	0.519821		0.697395	0.438885		0.697395	0.364792
0.699399	0.975617		0.699399	0.900903		0.699399	0.866626		0.699399	0.796466		0.699399	0.690025		0.699399	0.589421		0.699399	0.518774		0.699399	0.438141		0.699399	0.364527
0.701403	0.975507		0.701403	0.900473		0.701403	0.866061		0.701403	0.795652		0.701403	0.688938		0.701403	0.58826		0.701403	0.517716		0.701403	0.437392		0.701403	0.364261
0.703407	0.975394		0.703407	0.900035		0.703407	0.865486		0.703407	0.794826		0.703407	0.687835		0.703407	0.587084		0.703407	0.516646		0.703407	0.436637		0.703407	0.363994
0.705411	0.975279		0.705411	0.89959		0.705411	0.864901		0.705411	0.793985		0.705411	0.686716		0.705411	0.585894		0.705411	0.515565		0.705411	0.435876		0.705411	0.363725
0.707415	0.975163		0.707415	0.899137		0.707415	0.864306		0.707415	0.79313		0.707415	0.685579		0.707415	0.584688		0.707415	0.514473		0.707415	0.43511		0.707415	0.363455
0.709419	0.975044		0.709419	0.898676		0.709419	0.8637		0.709419	0.792262		0.709419	0.684426		0.709419	0.583468		0.709419	0.513369		0.709419	0.434337		0.709419	0.363183
0.711423	0.974923		0.711423	0.898207		0.711423	0.863085		0.711423	0.791379		0.711423	0.683256		0.711423	0.582232		0.711423	0.512255		0.711423	0.433559		0.711423	0.362911
0.713427	0.9748		0.713427	0.897729		0.713427	0.862458		0.713427	0.790481		0.713427	0.682068		0.713427	0.580981		0.713427	0.511128		0.713427	0.432775		0.713427	0.362637
0.715431	0.974674		0.715431	0.897244		0.715431	0.861821		0.715431	0.789569		0.715431	0.680863		0.715431	0.579714		0.715431	0.509991		0.715431	0.431986		0.715431	0.362362
0.717435	0.974547		0.717435	0.896749		0.717435	0.861173		0.717435	0.788641		0.717435	0.679639		0.717435	0.578432		0.717435	0.508842		0.717435	0.431191		0.717435	0.362086
0.719439	0.974417		0.719439	0.896247		0.719439	0.860514		0.719439	0.787698		0.719439	0.678398		0.719439	0.577135		0.719439	0.507682		0.719439	0.430391		0.719439	0.361809
0.721443	0.974285		0.721443	0.895735		0.721443	0.859844		0.721443	0.78674		0.721443	0.677138		0.721443	0.575822		0.721443	0.506511		0.721443	0.429586		0.721443	0.361531
0.723447	0.97415		0.723447	0.895214		0.723447	0.859161		0.723447	0.785766		0.723447	0.67586		0.723447	0.574493		0.723447	0.505329		0.723447	0.428775		0.723447	0.361252
0.725451	0.974013		0.725451	0.894685		0.725451	0.858468		0.725451	0.784776		0.725451	0.674564		0.725451	0.573148		0.725451	0.504135		0.725451	0.427959		0.725451	0.360971
0.727455	0.973874		0.727455	0.894146		0.727455	0.857762		0.727455	0.783769		0.727455	0.673248		0.727455	0.571788		0.727455	0.502931		0.727455	0.427138		0.727455	0.36069
0.729459	0.973732		0.729459	0.893597		0.729459	0.857043		0.729459	0.782746		0.729459	0.671913		0.729459	0.570412		0.729459	0.501715		0.729459	0.426312		0.729459	0.360409
0.731463	0.973587		0.731463	0.893039		0.731463	0.856313		0.731463	0.781706		0.731463	0.670559		0.731463	0.569019		0.731463	0.500488		0.731463	0.425482		0.731463	0.360126
0.733467	0.97344		0.733467	0.892471		0.733467	0.85557		0.733467	0.780648		0.733467	0.669185		0.733467	0.567611		0.733467	0.499251		0.733467	0.424646		0.733467	0.359843
0.735471	0.97329		0.735471	0.891892		0.735471	0.854813		0.735471	0.779574		0.735471	0.667791		0.735471	0.566186		0.735471	0.498002		0.735471	0.423806		0.735471	0.359558
0.737475	0.973137		0.737475	0.891304		0.737475	0.854044		0.737475	0.778481		0.737475	0.666376		0.737475	0.564746		0.737475	0.496743		0.737475	0.422961		0.737475	0.359273
0.739479	0.972981		0.739479	0.890705		0.739479	0.853261		0.739479	0.77737		0.739479	0.664942		0.739479	0.563289		0.739479	0.495473		0.739479	0.422112		0.739479	0.358988
0.741483	0.972823		0.741483	0.890095		0.741483	0.852464		0.741483	0.776241		0.741483	0.663487		0.741483	0.561816		0.741483	0.494191		0.741483	0.421258		0.741483	0.358702
0.743487	0.972661		0.743487	0.889474		0.743487	0.851653		0.743487	0.775093		0.743487	0.662011		0.743487	0.560326		0.743487	0.4929		0.743487	0.4204		0.743487	0.358415
0.745491	0.972497		0.745491	0.888842		0.745491	0.850828		0.745491	0.773925		0.745491	0.660513		0.745491	0.55882		0.745491	0.491597		0.745491	0.419538		0.745491	0.358128
0.747495	0.97233		0.747495	0.888199		0.747495	0.849989		0.747495	0.772738		0.747495	0.658995		0.747495	0.557297		0.747495	0.490284		0.747495	0.418672		0.747495	0.35784
0.749499	0.972159		0.749499	0.887544		0.749499	0.849134		0.749499	0.771532		0.749499	0.657454		0.749499	0.555758		0.749499	0.488961		0.749499	0.417801		0.749499	0.357552
0.751503	0.971985		0.751503	0.886877		0.751503	0.848265		0.751503	0.770305		0.751503	0.655891		0.751503	0.554203		0.751503	0.487627		0.751503	0.416927		0.751503	0.357264
0.753507	0.971808		0.753507	0.886198		0.753507	0.847379		0.753507	0.769057		0.753507	0.654307		0.753507	0.55263		0.753507	0.486282		0.753507	0.416049		0.753507	0.356975
0.755511	0.971627		0.755511	0.885507		0.755511	0.846478		0.755511	0.767789		0.755511	0.652699		0.755511	0.551041		0.755511	0.484928		0.755511	0.415168		0.755511	0.356686
0.757515	0.971443		0.757515	0.884803		0.757515	0.845561		0.757515	0.766499		0.757515	0.651069		0.757515	0.549436		0.757515	0.483563		0.757515	0.414283		0.757515	0.356396
0.759519	0.971256		0.759519	0.884085		0.759519	0.844627		0.759519	0.765187		0.759519	0.649416		0.759519	0.547813		0.759519	0.482188		0.759519	0.413394		0.759519	0.356107
0.761523	0.971065		0.761523	0.883355		0.761523	0.843677		0.761523	0.763853		0.761523	0.647739		0.761523	0.546174		0.761523	0.480803		0.761523	0.412503		0.761523	0.355817
0.763527	0.97087		0.763527	0.882611		0.763527	0.842709		0.763527	0.762497		0.763527	0.646038		0.763527	0.544518		0.763527	0.479408		0.763527	0.411608		0.763527	0.355527
0.765531	0.970671		0.765531	0.881853		0.765531	0.841723		0.765531	0.761117		0.765531	0.644314		0.765531	0.542845		0.765531	0.478004		0.765531	0.41071		0.765531	0.355237
0.767535	0.970469		0.767535	0.881081		0.767535	0.840719		0.767535	0.759714		0.767535	0.642565		0.767535	0.541156		0.767535	0.476589		0.767535	0.409809		0.767535	0.354947
0.769539	0.970262		0.769539	0.880294		0.769539	0.839697		0.769539	0.758286		0.769539	0.640791		0.769539	0.539449		0.769539	0.475166		0.769539	0.408905		0.769539	0.354658
0.771543	0.970052		0.771543	0.879492		0.771543	0.838656		0.771543	0.756835		0.771543	0.638993		0.771543	0.537726		0.771543	0.473732		0.771543	0.407999		0.771543	0.354368
0.773547	0.969837		0.773547	0.878675		0.773547	0.837596		0.773547	0.755358		0.773547	0.63717		0.773547	0.535986		0.773547	0.47229		0.773547	0.40709		0.773547	0.354078
0.775551	0.969618		0.775551	0.877843		0.775551	0.836516		0.775551	0.753856		0.775551	0.635321		0.775551	0.534229		0.775551	0.470838		0.775551	0.406179		0.775551	0.353789
0.777555	0.969395		0.777555	0.876994		0.777555	0.835416		0.777555	0.752327		0.777555	0.633446		0.777555	0.532456		0.777555	0.469378		0.777555	0.405265		0.777555	0.353499
0.779559	0.969167		0.779559	0.876129		0.779559	0.834295		0.779559	0.750772		0.779559	0.631545		0.779559	0.530665		0.779559	0.467908		0.779559	0.40435		0.779559	0.35321
0.781563	0.968934		0.781563	0.875248		0.781563	0.833153		0.781563	0.74919		0.781563	0.629617		0.781563	0.528858		0.781563	0.46643		0.781563	0.403432		0.781563	0.352921
0.783567	0.968697		0.783567	0.874349		0.783567	0.831989		0.783567	0.747581		0.783567	0.627663		0.783567	0.527035		0.783567	0.464943		0.783567	0.402513		0.783567	0.352633
0.785571	0.968454		0.785571	0.873432		0.785571	0.830803		0.785571	0.745943		0.785571	0.625682		0.785571	0.525194		0.785571	0.463448		0.785571	0.401592		0.785571	0.352345
0.787575	0.968207		0.787575	0.872498		0.787575	0.829595		0.787575	0.744276		0.787575	0.623673		0.787575	0.523337		0.787575	0.461945		0.787575	0.400669		0.787575	0.352058
0.789579	0.967955		0.789579	0.871544		0.789579	0.828363		0.789579	0.74258		0.789579	0.621637		0.789579	0.521464		0.789579	0.460434		0.789579	0.399745		0.789579	0.351771
0.791583	0.967697		0.791583	0.870572		0.791583	0.827107		0.791583	0.740854		0.791583	0.619573		0.791583	0.519574		0.791583	0.458914		0.791583	0.39882		0.791583	0.351484
0.793587	0.967434		0.793587	0.86958		0.793587	0.825827		0.793587	0.739097		0.793587	0.61748		0.793587	0.517667		0.793587	0.457388		0.793587	0.397894		0.793587	0.351198
0.795591	0.967165		0.795591	0.868568		0.795591	0.824521		0.795591	0.737309		0.795591	0.615359		0.795591	0.515745		0.795591	0.455853		0.795591	0.396967		0.795591	0.350913
0.797595	0.96689		0.797595	0.867536		0.797595	0.82319		0.797595	0.735488		0.797595	0.613209		0.797595	0.513806		0.797595	0.454312		0.797595	0.396039		0.797595	0.350629
0.799599	0.96661		0.799599	0.866482		0.799599	0.821833		0.799599	0.733635		0.799599	0.61103		0.799599	0.511851		0.799599	0.452764		0.799599	0.395111		0.799599	0.350345
0.801603	0.966323		0.801603	0.865406		0.801603	0.820448		0.801603	0.731749		0.801603	0.608821		0.801603	0.50988		0.801603	0.451208		0.801603	0.394182		0.801603	0.350062
0.803607	0.96603		0.803607	0.864309		0.803607	0.819036		0.803607	0.729828		0.803607	0.606582		0.803607	0.507894		0.803607	0.449647		0.803607	0.393254		0.803607	0.34978
0.805611	0.965731		0.805611	0.863188		0.805611	0.817595		0.805611	0.727873		0.805611	0.604314		0.805611	0.505891		0.805611	0.448078		0.805611	0.392325		0.805611	0.349499
0.807615	0.965424		0.807615	0.862043		0.807615	0.816125		0.807615	0.725882		0.807615	0.602014		0.807615	0.503874		0.807615	0.446504		0.807615	0.391396		0.807615	0.349218
0.809619	0.965111		0.809619	0.860875		0.809619	0.814625		0.809619	0.723854		0.809619	0.599685		0.809619	0.501841		0.809619	0.444924		0.809619	0.390467		0.809619	0.348939
0.811623	0.964791		0.811623	0.859681		0.811623	0.813094		0.811623	0.721789		0.811623	0.597324		0.811623	0.499792		0.811623	0.443339		0.811623	0.389539		0.811623	0.348661
0.813627	0.964464		0.813627	0.858462		0.813627	0.811531		0.813627	0.719686		0.813627	0.594932		0.813627	0.497729		0.813627	0.441748		0.813627	0.388612		0.813627	0.348384
0.815631	0.964129		0.815631	0.857216		0.815631	0.809936		0.815631	0.717544		0.815631	0.592509		0.815631	0.495651		0.815631	0.440152		0.815631	0.387685		0.815631	0.348108
0.817635	0.963786		0.817635	0.855943		0.817635	0.808307		0.817635	0.715362		0.817635	0.590054		0.817635	0.493559		0.817635	0.438552		0.817635	0.38676		0.817635	0.347833
0.819639	0.963435		0.819639	0.854643		0.819639	0.806644		0.819639	0.713139		0.819639	0.587567		0.819639	0.491453		0.819639	0.436947		0.819639	0.385836		0.819639	0.347559
0.821643	0.963076		0.821643	0.853313		0.821643	0.804945		0.821643	0.710874		0.821643	0.585048		0.821643	0.489332		0.821643	0.435338		0.821643	0.384913		0.821643	0.347287
0.823647	0.962708		0.823647	0.851953		0.823647	0.803211		0.823647	0.708567		0.823647	0.582496		0.823647	0.487198		0.823647	0.433725		0.823647	0.383992		0.823647	0.347016
0.825651	0.962332		0.825651	0.850563		0.825651	0.801438		0.825651	0.706217		0.825651	0.579912		0.825651	0.48505		0.825651	0.432109		0.825651	0.383072		0.825651	0.346746
0.827655	0.961946		0.827655	0.849141		0.827655	0.799627		0.827655	0.703822		0.827655	0.577295		0.827655	0.48289		0.827655	0.43049		0.827655	0.382155		0.827655	0.346478
0.829659	0.96155		0.829659	0.847687		0.829659	0.797777		0.829659	0.701381		0.829659	0.574645		0.829659	0.480716		0.829659	0.428868		0.829659	0.381239		0.829659	0.346211
0.831663	0.961145		0.831663	0.846199		0.831663	0.795885		0.831663	0.698893		0.831663	0.571962		0.831663	0.47853		0.831663	0.427243		0.831663	0.380326		0.831663	0.345946
0.833667	0.96073		0.833667	0.844676		0.833667	0.793952		0.833667	0.696358		0.833667	0.569246		0.833667	0.476332		0.833667	0.425617		0.833667	0.379416		0.833667	0.345682
0.835671	0.960304		0.835671	0.843118		0.835671	0.791975		0.835671	0.693774		0.835671	0.566496		0.835671	0.474123		0.835671	0.423988		0.835671	0.378508		0.835671	0.34542
0.837675	0.959868		0.837675	0.841522		0.837675	0.789953		0.837675	0.69114		0.837675	0.563713		0.837675	0.471902		0.837675	0.422359		0.837675	0.377604		0.837675	0.34516
0.839679	0.95942		0.839679	0.839889		0.839679	0.787886		0.839679	0.688455		0.839679	0.560897		0.839679	0.46967		0.839679	0.420728		0.839679	0.376702		0.839679	0.344901
0.841683	0.95896		0.841683	0.838215		0.841683	0.785771		0.841683	0.685718		0.841683	0.558047		0.841683	0.467428		0.841683	0.419097		0.841683	0.375804		0.841683	0.344644
0.843687	0.958488		0.843687	0.836501		0.843687	0.783607		0.843687	0.682927		0.843687	0.555163		0.843687	0.465176		0.843687	0.417466		0.843687	0.37491		0.843687	0.344389
0.845691	0.958003		0.845691	0.834745		0.845691	0.781392		0.845691	0.680082		0.845691	0.552246		0.845691	0.462914		0.845691	0.415835		0.845691	0.374019		0.845691	0.344136
0.847695	0.957506		0.847695	0.832945		0.847695	0.779126		0.847695	0.677181		0.847695	0.549295		0.847695	0.460644		0.847695	0.414205		0.847695	0.373133		0.847695	0.343885
0.849699	0.956994		0.849699	0.8311		0.849699	0.776806		0.849699	0.674222		0.849699	0.54631		0.849699	0.458365		0.849699	0.412576		0.849699	0.37225		0.849699	0.343635
0.851703	0.956469		0.851703	0.829208		0.851703	0.77443		0.851703	0.671205		0.851703	0.543293		0.851703	0.456078		0.851703	0.410949		0.851703	0.371372		0.851703	0.343388
0.853707	0.955929		0.853707	0.827267		0.853707	0.771997		0.853707	0.668129		0.853707	0.540242		0.853707	0.453784		0.853707	0.409324		0.853707	0.370499		0.853707	0.343142
0.855711	0.955374		0.855711	0.825277		0.855711	0.769505		0.855711	0.664991		0.855711	0.537158		0.855711	0.451484		0.855711	0.407701		0.855711	0.369631		0.855711	0.342899
0.857715	0.954802		0.857715	0.823234		0.857715	0.766952		0.857715	0.661791		0.857715	0.534041		0.857715	0.449177		0.857715	0.406081		0.857715	0.368767		0.857715	0.342658
0.859719	0.954214		0.859719	0.821137		0.859719	0.764335		0.859719	0.658527		0.859719	0.530892		0.859719	0.446865		0.859719	0.404465		0.859719	0.367909		0.859719	0.342419
0.861723	0.953609		0.861723	0.818985		0.861723	0.761653		0.861723	0.655198		0.861723	0.52771		0.861723	0.444548		0.861723	0.402853		0.861723	0.367057		0.861723	0.342182
0.863727	0.952986		0.863727	0.816774		0.863727	0.758904		0.863727	0.651802		0.863727	0.524497		0.863727	0.442228		0.863727	0.401245		0.863727	0.36621		0.863727	0.341948
0.865731	0.952343		0.865731	0.814503		0.865731	0.756085		0.865731	0.648339		0.865731	0.521253		0.865731	0.439904		0.865731	0.399642		0.865731	0.36537		0.865731	0.341716
0.867735	0.951682		0.867735	0.812169		0.867735	0.753193		0.867735	0.644806		0.867735	0.517977		0.867735	0.437577		0.867735	0.398044		0.867735	0.364535		0.867735	0.341486
0.869739	0.950999		0.869739	0.80977		0.869739	0.750227		0.869739	0.641202		0.869739	0.514672		0.869739	0.435249		0.869739	0.396453		0.869739	0.363707		0.869739	0.341259
0.871743	0.950295		0.871743	0.807303		0.871743	0.747183		0.871743	0.637526		0.871743	0.511336		0.871743	0.43292		0.871743	0.394868		0.871743	0.362886		0.871743	0.341034
0.873747	0.949569		0.873747	0.804766		0.873747	0.744059		0.873747	0.633776		0.873747	0.507972		0.873747	0.430591		0.873747	0.39329		0.873747	0.362071		0.873747	0.340811
0.875752	0.948819		0.875752	0.802155		0.875752	0.740852		0.875752	0.629951		0.875752	0.504579		0.875752	0.428262		0.875752	0.39172		0.875752	0.361264		0.875752	0.340591
0.877756	0.948045		0.877756	0.799468		0.877756	0.73756		0.877756	0.62605		0.877756	0.501159		0.877756	0.425936		0.877756	0.390158		0.877756	0.360463		0.877756	0.340374
0.87976	0.947244		0.87976	0.796702		0.87976	0.734177		0.87976	0.622071		0.87976	0.497712		0.87976	0.423611		0.87976	0.388604		0.87976	0.359671		0.87976	0.340159
0.881764	0.946417		0.881764	0.793853		0.881764	0.730703		0.881764	0.618014		0.881764	0.49424		0.881764	0.421291		0.881764	0.38706		0.881764	0.358886		0.881764	0.339947
0.883768	0.945561		0.883768	0.790918		0.883768	0.727133		0.883768	0.613875		0.883768	0.490743		0.883768	0.418974		0.883768	0.385526		0.883768	0.358109		0.883768	0.339738
0.885772	0.944675		0.885772	0.787892		0.885772	0.723464		0.885772	0.609655		0.885772	0.487223		0.885772	0.416664		0.885772	0.384002		0.885772	0.35734		0.885772	0.339531
0.887776	0.943758		0.887776	0.784773		0.887776	0.719691		0.887776	0.605352		0.887776	0.483681		0.887776	0.414359		0.887776	0.38249		0.887776	0.356579		0.887776	0.339327
0.88978	0.942807		0.88978	0.781555		0.88978	0.715812		0.88978	0.600965		0.88978	0.480118		0.88978	0.412062		0.88978	0.380989		0.88978	0.355828		0.88978	0.339126
0.891784	0.941822		0.891784	0.778235		0.891784	0.711823		0.891784	0.596493		0.891784	0.476535		0.891784	0.409774		0.891784	0.3795		0.891784	0.355085		0.891784	0.338928
0.893788	0.940799		0.893788	0.774807		0.893788	0.707719		0.893788	0.591935		0.893788	0.472935		0.893788	0.407496		0.893788	0.378024		0.893788	0.354351		0.893788	0.338732
0.895792	0.939738		0.895792	0.771268		0.895792	0.703495		0.895792	0.58729		0.895792	0.469318		0.895792	0.405228		0.895792	0.376561		0.895792	0.353626		0.895792	0.33854
0.897796	0.938636		0.897796	0.767611		0.897796	0.699148		0.897796	0.582558		0.897796	0.465687		0.897796	0.402972		0.897796	0.375112		0.897796	0.352911		0.897796	0.338351
0.8998	0.93749		0.8998	0.763832		0.8998	0.694674		0.8998	0.577737		0.8998	0.462043		0.8998	0.400729		0.8998	0.373678		0.8998	0.352206		0.8998	0.338164
0.901804	0.936298		0.901804	0.759924		0.901804	0.690066		0.901804	0.572827		0.901804	0.458389		0.901804	0.398501		0.901804	0.372259		0.901804	0.351511		0.901804	0.337981
0.903808	0.935058		0.903808	0.755881		0.903808	0.68532		0.903808	0.567829		0.903808	0.454726		0.903808	0.396288		0.903808	0.370857		0.903808	0.350825		0.903808	0.337801
0.905812	0.933765		0.905812	0.751697		0.905812	0.680432		0.905812	0.562742		0.905812	0.451056		0.905812	0.394092		0.905812	0.36947		0.905812	0.35015		0.905812	0.337623
0.907816	0.932418		0.907816	0.747365		0.907816	0.675396		0.907816	0.557566		0.907816	0.447383		0.907816	0.391914		0.907816	0.368101		0.907816	0.349486		0.907816	0.337449
0.90982	0.931012		0.90982	0.742878		0.90982	0.670206		0.90982	0.552301		0.90982	0.443707		0.90982	0.389755		0.90982	0.366749		0.90982	0.348832		0.90982	0.337279
0.911824	0.929544		0.911824	0.738227		0.911824	0.664858		0.911824	0.546949		0.911824	0.440033		0.911824	0.387616		0.911824	0.365416		0.911824	0.34819		0.911824	0.337111
0.913828	0.928009		0.913828	0.733406		0.913828	0.659345		0.913828	0.54151		0.913828	0.436361		0.913828	0.385499		0.913828	0.364102		0.913828	0.347558		0.913828	0.336947
0.915832	0.926403		0.915832	0.728404		0.915832	0.653662		0.915832	0.535986		0.915832	0.432697		0.915832	0.383406		0.915832	0.362807		0.915832	0.346938		0.915832	0.336786
0.917836	0.924721		0.917836	0.723213		0.917836	0.647804		0.917836	0.530378		0.917836	0.429041		0.917836	0.381337		0.917836	0.361533		0.917836	0.34633		0.917836	0.336628
0.91984	0.922957		0.91984	0.717824		0.91984	0.641764		0.91984	0.524689		0.91984	0.425397		0.91984	0.379293		0.91984	0.360279		0.91984	0.345733		0.91984	0.336474
0.921844	0.921106		0.921844	0.712225		0.921844	0.635536		0.921844	0.518921		0.921844	0.421769		0.921844	0.377277		0.921844	0.359047		0.921844	0.345148		0.921844	0.336323
0.923848	0.919161		0.923848	0.706407		0.923848	0.629116		0.923848	0.513077		0.923848	0.418159		0.923848	0.375289		0.923848	0.357837		0.923848	0.344576		0.923848	0.336175
0.925852	0.917114		0.925852	0.700358		0.925852	0.622497		0.925852	0.50716		0.925852	0.414572		0.925852	0.373332		0.925852	0.356649		0.925852	0.344016		0.925852	0.336031
0.927856	0.914958		0.927856	0.694066		0.927856	0.615675		0.927856	0.501176		0.927856	0.41101		0.927856	0.371405		0.927856	0.355485		0.927856	0.343468		0.927856	0.335891
0.92986	0.912684		0.92986	0.687518		0.92986	0.608644		0.92986	0.495128		0.92986	0.407476		0.92986	0.369511		0.92986	0.354345		0.92986	0.342933		0.92986	0.335753
0.931864	0.910282		0.931864	0.680702		0.931864	0.601401		0.931864	0.489022		0.931864	0.403976		0.931864	0.367651		0.931864	0.353229		0.931864	0.342411		0.931864	0.33562
0.933868	0.90774		0.933868	0.673604		0.933868	0.593939		0.933868	0.482864		0.933868	0.400512		0.933868	0.365826		0.933868	0.352138		0.933868	0.341902		0.933868	0.33549
0.935872	0.905047		0.935872	0.66621		0.935872	0.586258		0.935872	0.47666		0.935872	0.397089		0.935872	0.364038		0.935872	0.351073		0.935872	0.341406		0.935872	0.335363
0.937876	0.902189		0.937876	0.658506		0.937876	0.578353		0.937876	0.470419		0.937876	0.39371		0.937876	0.362288		0.937876	0.350034		0.937876	0.340924		0.937876	0.335241
0.93988	0.89915		0.93988	0.650476		0.93988	0.570225		0.93988	0.464149		0.93988	0.39038		0.93988	0.360577		0.93988	0.349021		0.93988	0.340455		0.93988	0.335121
0.941884	0.895913		0.941884	0.642107		0.941884	0.561871		0.941884	0.457858		0.941884	0.387103		0.941884	0.358907		0.941884	0.348036		0.941884	0.34		0.941884	0.335006
0.943888	0.892459		0.943888	0.633383		0.943888	0.553294		0.943888	0.451557		0.943888	0.383882		0.943888	0.357279		0.943888	0.347079		0.943888	0.339559		0.943888	0.334894
0.945892	0.888763		0.945892	0.62429		0.945892	0.544498		0.945892	0.445257		0.945892	0.380723		0.945892	0.355695		0.945892	0.34615		0.945892	0.339132		0.945892	0.334786
0.947896	0.884802		0.947896	0.614815		0.947896	0.535486		0.947896	0.438969		0.947896	0.377629		0.947896	0.354155		0.947896	0.34525		0.947896	0.338719		0.947896	0.334682
0.9499	0.880545		0.9499	0.604944		0.9499	0.526267		0.9499	0.432706		0.9499	0.374605		0.9499	0.352662		0.9499	0.34438		0.9499	0.33832		0.9499	0.334581
0.951904	0.875958		0.951904	0.594666		0.951904	0.516852		0.951904	0.426481		0.951904	0.371656		0.951904	0.351215		0.951904	0.343539		0.951904	0.337936		0.951904	0.334484
0.953908	0.871003		0.953908	0.583974		0.953908	0.507253		0.953908	0.42031		0.953908	0.368784		0.953908	0.349817		0.953908	0.342729		0.953908	0.337566		0.953908	0.334391
0.955912	0.865632		0.955912	0.57286		0.955912	0.497488		0.955912	0.414207		0.955912	0.365996		0.955912	0.348469		0.955912	0.341949		0.955912	0.337211		0.955912	0.334302
0.957916	0.859794		0.957916	0.561324		0.957916	0.487579		0.957916	0.408189		0.957916	0.363295		0.957916	0.347172		0.957916	0.341201		0.957916	0.336872		0.957916	0.334217
0.95992	0.853424		0.95992	0.54937		0.95992	0.47755		0.95992	0.402271		0.95992	0.360686		0.95992	0.345927		0.95992	0.340485		0.95992	0.336547		0.95992	0.334135
0.961924	0.846448		0.961924	0.537007		0.961924	0.467433		0.961924	0.396473		0.961924	0.358172		0.961924	0.344734		0.961924	0.3398		0.961924	0.336237		0.961924	0.334057
0.963928	0.838777		0.963928	0.524254		0.963928	0.457262		0.963928	0.390812		0.963928	0.355758		0.963928	0.343596		0.963928	0.339149		0.963928	0.335942		0.963928	0.333984
0.965932	0.830303		0.965932	0.511139		0.965932	0.44708		0.965932	0.385307		0.965932	0.353449		0.965932	0.342514		0.965932	0.33853		0.965932	0.335663		0.965932	0.333914
0.967936	0.820895		0.967936	0.497701		0.967936	0.436932		0.967936	0.379977		0.967936	0.351247		0.967936	0.341487		0.967936	0.337944		0.967936	0.335399		0.967936	0.333848
0.96994	0.810395		0.96994	0.483996		0.96994	0.42687		0.96994	0.374841		0.96994	0.349157		0.96994	0.340518		0.96994	0.337392		0.96994	0.33515		0.96994	0.333786
0.971944	0.798607		0.971944	0.470091		0.971944	0.416954		0.971944	0.36992		0.971944	0.347183		0.971944	0.339607		0.971944	0.336874		0.971944	0.334918		0.971944	0.333728
0.973948	0.785287		0.973948	0.456074		0.973948	0.407247		0.973948	0.365232		0.973948	0.345328		0.973948	0.338754		0.973948	0.336391		0.973948	0.3347		0.973948	0.333673
0.975952	0.770127		0.975952	0.442052		0.975952	0.397818		0.975952	0.360798		0.975952	0.343596		0.975952	0.337962		0.975952	0.335942		0.975952	0.334499		0.975952	0.333623
0.977956	0.752742		0.977956	0.428149		0.977956	0.388738		0.977956	0.356636		0.977956	0.34199		0.977956	0.33723		0.977956	0.335528		0.977956	0.334314		0.977956	0.333577
0.97996	0.732639		0.97996	0.414513		0.97996	0.380086		0.97996	0.352764		0.97996	0.340513		0.97996	0.336559		0.97996	0.335149		0.97996	0.334144		0.97996	0.333535
0.981964	0.709193		0.981964	0.401311		0.981964	0.37194		0.981964	0.349201		0.981964	0.339167		0.981964	0.33595		0.981964	0.334806		0.981964	0.33399		0.981964	0.333497
0.983968	0.681614		0.983968	0.388723		0.983968	0.364378		0.983968	0.345963		0.983968	0.337956		0.983968	0.335404		0.983968	0.334498		0.983968	0.333853		0.983968	0.333462
0.985972	0.648941		0.985972	0.376949		0.985972	0.357481		0.985972	0.343067		0.985972	0.336881		0.985972	0.334921		0.985972	0.334225		0.985972	0.333731		0.985972	0.333432
0.987976	0.610091		0.987976	0.36619		0.987976	0.351323		0.987976	0.340525		0.987976	0.335946		0.987976	0.334501		0.987976	0.333989		0.987976	0.333626		0.987976	0.333406
0.98998	0.564097		0.98998	0.356652		0.98998	0.345976		0.98998	0.338352		0.98998	0.335151		0.98998	0.334145		0.98998	0.333789		0.98998	0.333536		0.98998	0.333384
0.991984	0.510771		0.991984	0.348531		0.991984	0.341505		0.991984	0.336558		0.991984	0.334498		0.991984	0.333853		0.991984	0.333625		0.991984	0.333463		0.991984	0.333366
0.993988	0.452133		0.993988	0.342006		0.993988	0.337966		0.993988	0.335153		0.993988	0.333989		0.993988	0.333626		0.993988	0.333498		0.993988	0.333406		0.993988	0.333351
0.995992	0.39461		0.995992	0.337228		0.995992	0.335404		0.995992	0.334144		0.995992	0.333625		0.995992	0.333463		0.995992	0.333406		0.995992	0.333366		0.995992	0.333341
0.997996	0.35031		0.997996	0.334313		0.997996	0.333853		0.997996	0.333536		0.997996	0.333406		0.997996	0.333366		0.997996	0.333352		0.997996	0.333341		0.997996	0.333335
1	0.333333		1	0.333333		1	0.333333		1	0.333333		1	0.333333		1	0.333333		1	0.333333		1	0.333333		1	0.333333
1.002	0.35031		1.002	0.334313		1.002	0.333853		1.002	0.333536		1.002	0.333406		1.002	0.333366		1.002	0.333352		1.002	0.333341		1.002	0.333335
1.00401	0.39461		1.00401	0.337228		1.00401	0.335404		1.00401	0.334144		1.00401	0.333625		1.00401	0.333463		1.00401	0.333406		1.00401	0.333366		1.00401	0.333341
1.00601	0.452133		1.00601	0.342006		1.00601	0.337966		1.00601	0.335153		1.00601	0.333989		1.00601	0.333626		1.00601	0.333498		1.00601	0.333406		1.00601	0.333351
1.00802	0.510771		1.00802	0.348531		1.00802	0.341505		1.00802	0.336558		1.00802	0.334498		1.00802	0.333853		1.00802	0.333625		1.00802	0.333463		1.00802	0.333366
1.01002	0.564097		1.01002	0.356652		1.01002	0.345976		1.01002	0.338352		1.01002	0.335151		1.01002	0.334145		1.01002	0.333789		1.01002	0.333536		1.01002	0.333384
1.01202	0.610091		1.01202	0.36619		1.01202	0.351323		1.01202	0.340525		1.01202	0.335946		1.01202	0.334501		1.01202	0.333989		1.01202	0.333626		1.01202	0.333406
1.01403	0.648941		1.01403	0.376949		1.01403	0.357481		1.01403	0.343067		1.01403	0.336881		1.01403	0.334921		1.01403	0.334225		1.01403	0.333731		1.01403	0.333432
1.01603	0.681614		1.01603	0.388723		1.01603	0.364378		1.01603	0.345963		1.01603	0.337956		1.01603	0.335404		1.01603	0.334498		1.01603	0.333853		1.01603	0.333462
1.01804	0.709193		1.01804	0.401311		1.01804	0.37194		1.01804	0.349201		1.01804	0.339167		1.01804	0.33595		1.01804	0.334806		1.01804	0.33399		1.01804	0.333497
1.02004	0.732639		1.02004	0.414513		1.02004	0.380086		1.02004	0.352764		1.02004	0.340513		1.02004	0.336559		1.02004	0.335149		1.02004	0.334144		1.02004	0.333535
1.02204	0.752742		1.02204	0.428149		1.02204	0.388738		1.02204	0.356636		1.02204	0.34199		1.02204	0.33723		1.02204	0.335528		1.02204	0.334314		1.02204	0.333577
1.02405	0.770127		1.02405	0.442052		1.02405	0.397818		1.02405	0.360798		1.02405	0.343596		1.02405	0.337962		1.02405	0.335942		1.02405	0.334499		1.02405	0.333623
1.02605	0.785287		1.02605	0.456074		1.02605	0.407247		1.02605	0.365232		1.02605	0.345328		1.02605	0.338754		1.02605	0.336391		1.02605	0.3347		1.02605	0.333673
1.02806	0.798607		1.02806	0.470091		1.02806	0.416954		1.02806	0.36992		1.02806	0.347183		1.02806	0.339607		1.02806	0.336874		1.02806	0.334918		1.02806	0.333728
1.03006	0.810395		1.03006	0.483996		1.03006	0.42687		1.03006	0.374841		1.03006	0.349157		1.03006	0.340518		1.03006	0.337392		1.03006	0.33515		1.03006	0.333786
1.03206	0.820895		1.03206	0.497701		1.03206	0.436932		1.03206	0.379977		1.03206	0.351247		1.03206	0.341487		1.03206	0.337944		1.03206	0.335399		1.03206	0.333848
1.03407	0.830303		1.03407	0.511139		1.03407	0.44708		1.03407	0.385307		1.03407	0.353449		1.03407	0.342514		1.03407	0.33853		1.03407	0.335663		1.03407	0.333914
1.03607	0.838777		1.03607	0.524254		1.03607	0.457262		1.03607	0.390812		1.03607	0.355758		1.03607	0.343596		1.03607	0.339149		1.03607	0.335942		1.03607	0.333984
1.03808	0.846448		1.03808	0.537007		1.03808	0.467433		1.03808	0.396473		1.03808	0.358172		1.03808	0.344734		1.03808	0.3398		1.03808	0.336237		1.03808	0.334057
1.04008	0.853424		1.04008	0.54937		1.04008	0.47755		1.04008	0.402271		1.04008	0.360686		1.04008	0.345927		1.04008	0.340485		1.04008	0.336547		1.04008	0.334135
1.04208	0.859794		1.04208	0.561324		1.04208	0.487579		1.04208	0.408189		1.04208	0.363295		1.04208	0.347172		1.04208	0.341201		1.04208	0.336872		1.04208	0.334217
1.04409	0.865632		1.04409	0.57286		1.04409	0.497488		1.04409	0.414207		1.04409	0.365996		1.04409	0.348469		1.04409	0.341949		1.04409	0.337211		1.04409	0.334302
1.04609	0.871003		1.04609	0.583974		1.04609	0.507253		1.04609	0.42031		1.04609	0.368784		1.04609	0.349817		1.04609	0.342729		1.04609	0.337566		1.04609	0.334391
1.0481	0.875958		1.0481	0.594666		1.0481	0.516852		1.0481	0.426481		1.0481	0.371656		1.0481	0.351215		1.0481	0.343539		1.0481	0.337936		1.0481	0.334484
1.0501	0.880545		1.0501	0.604944		1.0501	0.526267		1.0501	0.432706		1.0501	0.374605		1.0501	0.352662		1.0501	0.34438		1.0501	0.33832		1.0501	0.334581
1.0521	0.884802		1.0521	0.614815		1.0521	0.535486		1.0521	0.438969		1.0521	0.377629		1.0521	0.354155		1.0521	0.34525		1.0521	0.338719		1.0521	0.334682
1.05411	0.888763		1.05411	0.62429		1.05411	0.544498		1.05411	0.445257		1.05411	0.380723		1.05411	0.355695		1.05411	0.34615		1.05411	0.339132		1.05411	0.334786
1.05611	0.892459		1.05611	0.633383		1.05611	0.553294		1.05611	0.451557		1.05611	0.383882		1.05611	0.357279		1.05611	0.347079		1.05611	0.339559		1.05611	0.334894
1.05812	0.895913		1.05812	0.642107		1.05812	0.561871		1.05812	0.457858		1.05812	0.387103		1.05812	0.358907		1.05812	0.348036		1.05812	0.34		1.05812	0.335006
1.06012	0.89915		1.06012	0.650476		1.06012	0.570225		1.06012	0.464149		1.06012	0.39038		1.06012	0.360577		1.06012	0.349021		1.06012	0.340455		1.06012	0.335121
1.06212	0.902189		1.06212	0.658506		1.06212	0.578353		1.06212	0.470419		1.06212	0.39371		1.06212	0.362288		1.06212	0.350034		1.06212	0.340924		1.06212	0.335241
1.06413	0.905047		1.06413	0.66621		1.06413	0.586258		1.06413	0.47666		1.06413	0.397089		1.06413	0.364038		1.06413	0.351073		1.06413	0.341406		1.06413	0.335363
1.06613	0.90774		1.06613	0.673604		1.06613	0.593939		1.06613	0.482864		1.06613	0.400512		1.06613	0.365826		1.06613	0.352138		1.06613	0.341902		1.06613	0.33549
1.06814	0.910282		1.06814	0.680702		1.06814	0.601401		1.06814	0.489022		1.06814	0.403976		1.06814	0.367651		1.06814	0.353229		1.06814	0.342411		1.06814	0.33562
1.07014	0.912684		1.07014	0.687518		1.07014	0.608644		1.07014	0.495128		1.07014	0.407476		1.07014	0.369511		1.07014	0.354345		1.07014	0.342933		1.07014	0.335753
1.07214	0.914958		1.07214	0.694066		1.07214	0.615675		1.07214	0.501176		1.07214	0.41101		1.07214	0.371405		1.07214	0.355485		1.07214	0.343468		1.07214	0.335891
1.07415	0.917114		1.07415	0.700358		1.07415	0.622497		1.07415	0.50716		1.07415	0.414572		1.07415	0.373332		1.07415	0.356649		1.07415	0.344016		1.07415	0.336031
1.07615	0.919161		1.07615	0.706407		1.07615	0.629116		1.07615	0.513077		1.07615	0.418159		1.07615	0.375289		1.07615	0.357837		1.07615	0.344576		1.07615	0.336175
1.07816	0.921106		1.07816	0.712225		1.07816	0.635536		1.07816	0.518921		1.07816	0.421769		1.07816	0.377277		1.07816	0.359047		1.07816	0.345148		1.07816	0.336323
1.08016	0.922957		1.08016	0.717824		1.08016	0.641764		1.08016	0.524689		1.08016	0.425397		1.08016	0.379293		1.08016	0.360279		1.08016	0.345733		1.08016	0.336474
1.08216	0.924721		1.08216	0.723213		1.08216	0.647804		1.08216	0.530378		1.08216	0.429041		1.08216	0.381337		1.08216	0.361533		1.08216	0.34633		1.08216	0.336628
1.08417	0.926403		1.08417	0.728404		1.08417	0.653662		1.08417	0.535986		1.08417	0.432697		1.08417	0.383406		1.08417	0.362807		1.08417	0.346938		1.08417	0.336786
1.08617	0.928009		1.08617	0.733406		1.08617	0.659345		1.08617	0.54151		1.08617	0.436361		1.08617	0.385499		1.08617	0.364102		1.08617	0.347558		1.08617	0.336947
1.08818	0.929544		1.08818	0.738227		1.08818	0.664858		1.08818	0.546949		1.08818	0.440033		1.08818	0.387616		1.08818	0.365416		1.08818	0.34819		1.08818	0.337111
1.09018	0.931012		1.09018	0.742878		1.09018	0.670206		1.09018	0.552301		1.09018	0.443707		1.09018	0.389755		1.09018	0.366749		1.09018	0.348832		1.09018	0.337279
1.09218	0.932418		1.09218	0.747365		1.09218	0.675396		1.09218	0.557566		1.09218	0.447383		1.09218	0.391914		1.09218	0.368101		1.09218	0.349486		1.09218	0.337449
1.09419	0.933765		1.09419	0.751697		1.09419	0.680432		1.09419	0.562742		1.09419	0.451056		1.09419	0.394092		1.09419	0.36947		1.09419	0.35015		1.09419	0.337623
1.09619	0.935058		1.09619	0.755881		1.09619	0.68532		1.09619	0.567829		1.09619	0.454726		1.09619	0.396288		1.09619	0.370857		1.09619	0.350825		1.09619	0.337801
1.0982	0.936298		1.0982	0.759924		1.0982	0.690066		1.0982	0.572827		1.0982	0.458389		1.0982	0.398501		1.0982	0.372259		1.0982	0.351511		1.0982	0.337981
1.1002	0.93749		1.1002	0.763832		1.1002	0.694674		1.1002	0.577737		1.1002	0.462043		1.1002	0.400729		1.1002	0.373678		1.1002	0.352206		1.1002	0.338164
1.1022	0.938636		1.1022	0.767611		1.1022	0.699148		1.1022	0.582558		1.1022	0.465687		1.1022	0.402972		1.1022	0.375112		1.1022	0.352911		1.1022	0.338351
1.10421	0.939738		1.10421	0.771268		1.10421	0.703495		1.10421	0.58729		1.10421	0.469318		1.10421	0.405228		1.10421	0.376561		1.10421	0.353626		1.10421	0.33854
1.10621	0.940799		1.10621	0.774807		1.10621	0.707719		1.10621	0.591935		1.10621	0.472935		1.10621	0.407496		1.10621	0.378024		1.10621	0.354351		1.10621	0.338732
1.10822	0.941822		1.10822	0.778235		1.10822	0.711823		1.10822	0.596493		1.10822	0.476535		1.10822	0.409774		1.10822	0.3795		1.10822	0.355085		1.10822	0.338928
1.11022	0.942807		1.11022	0.781555		1.11022	0.715812		1.11022	0.600965		1.11022	0.480118		1.11022	0.412062		1.11022	0.380989		1.11022	0.355828		1.11022	0.339126
1.11222	0.943758		1.11222	0.784773		1.11222	0.719691		1.11222	0.605352		1.11222	0.483681		1.11222	0.414359		1.11222	0.38249		1.11222	0.356579		1.11222	0.339327
1.11423	0.944675		1.11423	0.787892		1.11423	0.723464		1.11423	0.609655		1.11423	0.487223		1.11423	0.416664		1.11423	0.384002		1.11423	0.35734		1.11423	0.339531
1.11623	0.945561		1.11623	0.790918		1.11623	0.727133		1.11623	0.613875		1.11623	0.490743		1.11623	0.418974		1.11623	0.385526		1.11623	0.358109		1.11623	0.339738
1.11824	0.946417		1.11824	0.793853		1.11824	0.730703		1.11824	0.618014		1.11824	0.49424		1.11824	0.421291		1.11824	0.38706		1.11824	0.358886		1.11824	0.339947
1.12024	0.947244		1.12024	0.796702		1.12024	0.734177		1.12024	0.622071		1.12024	0.497712		1.12024	0.423611		1.12024	0.388604		1.12024	0.359671		1.12024	0.340159
1.12224	0.948045		1.12224	0.799468		1.12224	0.73756		1.12224	0.62605		1.12224	0.501159		1.12224	0.425936		1.12224	0.390158		1.12224	0.360463		1.12224	0.340374
1.12425	0.948819		1.12425	0.802155		1.12425	0.740852		1.12425	0.629951		1.12425	0.504579		1.12425	0.428262		1.12425	0.39172		1.12425	0.361264		1.12425	0.340591
1.12625	0.949569		1.12625	0.804766		1.12625	0.744059		1.12625	0.633776		1.12625	0.507972		1.12625	0.430591		1.12625	0.39329		1.12625	0.362071		1.12625	0.340811
1.12826	0.950295		1.12826	0.807303		1.12826	0.747183		1.12826	0.637526		1.12826	0.511336		1.12826	0.43292		1.12826	0.394868		1.12826	0.362886		1.12826	0.341034
1.13026	0.950999		1.13026	0.80977		1.13026	0.750227		1.13026	0.641202		1.13026	0.514672		1.13026	0.435249		1.13026	0.396453		1.13026	0.363707		1.13026	0.341259
1.13226	0.951682		1.13226	0.812169		1.13226	0.753193		1.13226	0.644806		1.13226	0.517977		1.13226	0.437577		1.13226	0.398044		1.13226	0.364535		1.13226	0.341486
1.13427	0.952343		1.13427	0.814503		1.13427	0.756085		1.13427	0.648339		1.13427	0.521253		1.13427	0.439904		1.13427	0.399642		1.13427	0.36537		1.13427	0.341716
1.13627	0.952986		1.13627	0.816774		1.13627	0.758904		1.13627	0.651802		1.13627	0.524497		1.13627	0.442228		1.13627	0.401245		1.13627	0.36621		1.13627	0.341948
1.13828	0.953609		1.13828	0.818985		1.13828	0.761653		1.13828	0.655198		1.13828	0.52771		1.13828	0.444548		1.13828	0.402853		1.13828	0.367057		1.13828	0.342182
1.14028	0.954214		1.14028	0.821137		1.14028	0.764335		1.14028	0.658527		1.14028	0.530892		1.14028	0.446865		1.14028	0.404465		1.14028	0.367909		1.14028	0.342419
1.14228	0.954802		1.14228	0.823234		1.14228	0.766952		1.14228	0.661791		1.14228	0.534041		1.14228	0.449177		1.14228	0.406081		1.14228	0.368767		1.14228	0.342658
1.14429	0.955374		1.14429	0.825277		1.14429	0.769505		1.14429	0.664991		1.14429	0.537158		1.14429	0.451484		1.14429	0.407701		1.14429	0.369631		1.14429	0.342899
1.14629	0.955929		1.14629	0.827267		1.14629	0.771997		1.14629	0.668129		1.14629	0.540242		1.14629	0.453784		1.14629	0.409324		1.14629	0.370499		1.14629	0.343142
1.1483	0.956469		1.1483	0.829208		1.1483	0.77443		1.1483	0.671205		1.1483	0.543293		1.1483	0.456078		1.1483	0.410949		1.1483	0.371372		1.1483	0.343388
1.1503	0.956994		1.1503	0.8311		1.1503	0.776806		1.1503	0.674222		1.1503	0.54631		1.1503	0.458365		1.1503	0.412576		1.1503	0.37225		1.1503	0.343635
1.1523	0.957506		1.1523	0.832945		1.1523	0.779126		1.1523	0.677181		1.1523	0.549295		1.1523	0.460644		1.1523	0.414205		1.1523	0.373133		1.1523	0.343885
1.15431	0.958003		1.15431	0.834745		1.15431	0.781392		1.15431	0.680082		1.15431	0.552246		1.15431	0.462914		1.15431	0.415835		1.15431	0.374019		1.15431	0.344136
1.15631	0.958488		1.15631	0.836501		1.15631	0.783607		1.15631	0.682927		1.15631	0.555163		1.15631	0.465176		1.15631	0.417466		1.15631	0.37491		1.15631	0.344389
1.15832	0.95896		1.15832	0.838215		1.15832	0.785771		1.15832	0.685718		1.15832	0.558047		1.15832	0.467428		1.15832	0.419097		1.15832	0.375804		1.15832	0.344644
1.16032	0.95942		1.16032	0.839889		1.16032	0.787886		1.16032	0.688455		1.16032	0.560897		1.16032	0.46967		1.16032	0.420728		1.16032	0.376702		1.16032	0.344901
1.16232	0.959868		1.16232	0.841522		1.16232	0.789953		1.16232	0.69114		1.16232	0.563713		1.16232	0.471902		1.16232	0.422359		1.16232	0.377604		1.16232	0.34516
1.16433	0.960304		1.16433	0.843118		1.16433	0.791975		1.16433	0.693774		1.16433	0.566496		1.16433	0.474123		1.16433	0.423988		1.16433	0.378508		1.16433	0.34542
1.16633	0.96073		1.16633	0.844676		1.16633	0.793952		1.16633	0.696358		1.16633	0.569246		1.16633	0.476332		1.16633	0.425617		1.16633	0.379416		1.16633	0.345682
1.16834	0.961145		1.16834	0.846199		1.16834	0.795885		1.16834	0.698893		1.16834	0.571962		1.16834	0.47853		1.16834	0.427243		1.16834	0.380326		1.16834	0.345946
1.17034	0.96155		1.17034	0.847687		1.17034	0.797777		1.17034	0.701381		1.17034	0.574645		1.17034	0.480716		1.17034	0.428868		1.17034	0.381239		1.17034	0.346211
1.17234	0.961946		1.17234	0.849141		1.17234	0.799627		1.17234	0.703822		1.17234	0.577295		1.17234	0.48289		1.17234	0.43049		1.17234	0.382155		1.17234	0.346478
1.17435	0.962332		1.17435	0.850563		1.17435	0.801438		1.17435	0.706217		1.17435	0.579912		1.17435	0.48505		1.17435	0.432109		1.17435	0.383072		1.17435	0.346746
1.17635	0.962708		1.17635	0.851953		1.17635	0.803211		1.17635	0.708567		1.17635	0.582496		1.17635	0.487198		1.17635	0.433725		1.17635	0.383992		1.17635	0.347016
1.17836	0.963076		1.17836	0.853313		1.17836	0.804945		1.17836	0.710874		1.17836	0.585048		1.17836	0.489332		1.17836	0.435338		1.17836	0.384913		1.17836	0.347287
1.18036	0.963435		1.18036	0.854643		1.18036	0.806644		1.18036	0.713139		1.18036	0.587567		1.18036	0.491453		1.18036	0.436947		1.18036	0.385836		1.18036	0.347559
1.18236	0.963786		1.18236	0.855943		1.18236	0.808307		1.18236	0.715362		1.18236	0.590054		1.18236	0.493559		1.18236	0.438552		1.18236	0.38676		1.18236	0.347833
1.18437	0.964129		1.18437	0.857216		1.18437	0.809936		1.18437	0.717544		1.18437	0.592509		1.18437	0.495651		1.18437	0.440152		1.18437	0.387685		1.18437	0.348108
1.18637	0.964464		1.18637	0.858462		1.18637	0.811531		1.18637	0.719686		1.18637	0.594932		1.18637	0.497729		1.18637	0.441748		1.18637	0.388612		1.18637	0.348384
1.18838	0.964791		1.18838	0.859681		1.18838	0.813094		1.18838	0.721789		1.18838	0.597324		1.18838	0.499792		1.18838	0.443339		1.18838	0.389539		1.18838	0.348661
1.19038	0.965111		1.19038	0.860875		1.19038	0.814625		1.19038	0.723854		1.19038	0.599685		1.19038	0.501841		1.19038	0.444924		1.19038	0.390467		1.19038	0.348939
1.19238	0.965424		1.19238	0.862043		1.19238	0.816125		1.19238	0.725882		1.19238	0.602014		1.19238	0.503874		1.19238	0.446504		1.19238	0.391396		1.19238	0.349218
1.19439	0.965731		1.19439	0.863188		1.19439	0.817595		1.19439	0.727873		1.19439	0.604314		1.19439	0.505891		1.19439	0.448078		1.19439	0.392325		1.19439	0.349499
1.19639	0.96603		1.19639	0.864309		1.19639	0.819036		1.19639	0.729828		1.19639	0.606582		1.19639	0.507894		1.19639	0.449647		1.19639	0.393254		1.19639	0.34978
1.1984	0.966323		1.1984	0.865406		1.1984	0.820448		1.1984	0.731749		1.1984	0.608821		1.1984	0.50988		1.1984	0.451208		1.1984	0.394182		1.1984	0.350062
1.2004	0.96661		1.2004	0.866482		1.2004	0.821833		1.2004	0.733635		1.2004	0.61103		1.2004	0.511851		1.2004	0.452764		1.2004	0.395111		1.2004	0.350345
1.2024	0.96689		1.2024	0.867536		1.2024	0.82319		1.2024	0.735488		1.2024	0.613209		1.2024	0.513806		1.2024	0.454312		1.2024	0.396039		1.2024	0.350629
1.20441	0.967165		1.20441	0.868568		1.20441	0.824521		1.20441	0.737309		1.20441	0.615359		1.20441	0.515745		1.20441	0.455853		1.20441	0.396967		1.20441	0.350913
1.20641	0.967434		1.20641	0.86958		1.20641	0.825827		1.20641	0.739097		1.20641	0.61748		1.20641	0.517667		1.20641	0.457388		1.20641	0.397894		1.20641	0.351198
1.20842	0.967697		1.20842	0.870572		1.20842	0.827107		1.20842	0.740854		1.20842	0.619573		1.20842	0.519574		1.20842	0.458914		1.20842	0.39882		1.20842	0.351484
1.21042	0.967955		1.21042	0.871544		1.21042	0.828363		1.21042	0.74258		1.21042	0.621637		1.21042	0.521464		1.21042	0.460434		1.21042	0.399745		1.21042	0.351771
1.21242	0.968207		1.21242	0.872498		1.21242	0.829595		1.21242	0.744276		1.21242	0.623673		1.21242	0.523337		1.21242	0.461945		1.21242	0.400669		1.21242	0.352058
1.21443	0.968454		1.21443	0.873432		1.21443	0.830803		1.21443	0.745943		1.21443	0.625682		1.21443	0.525194		1.21443	0.463448		1.21443	0.401592		1.21443	0.352345
1.21643	0.968697		1.21643	0.874349		1.21643	0.831989		1.21643	0.747581		1.21643	0.627663		1.21643	0.527035		1.21643	0.464943		1.21643	0.402513		1.21643	0.352633
1.21844	0.968934		1.21844	0.875248		1.21844	0.833153		1.21844	0.74919		1.21844	0.629617		1.21844	0.528858		1.21844	0.46643		1.21844	0.403432		1.21844	0.352921
1.22044	0.969167		1.22044	0.876129		1.22044	0.834295		1.22044	0.750772		1.22044	0.631545		1.22044	0.530665		1.22044	0.467908		1.22044	0.40435		1.22044	0.35321
1.22244	0.969395		1.22244	0.876994		1.22244	0.835416		1.22244	0.752327		1.22244	0.633446		1.22244	0.532456		1.22244	0.469378		1.22244	0.405265		1.22244	0.353499
1.22445	0.969618		1.22445	0.877843		1.22445	0.836516		1.22445	0.753856		1.22445	0.635321		1.22445	0.534229		1.22445	0.470838		1.22445	0.406179		1.22445	0.353789
1.22645	0.969837		1.22645	0.878675		1.22645	0.837596		1.22645	0.755358		1.22645	0.63717		1.22645	0.535986		1.22645	0.47229		1.22645	0.40709		1.22645	0.354078
1.22846	0.970052		1.22846	0.879492		1.22846	0.838656		1.22846	0.756835		1.22846	0.638993		1.22846	0.537726		1.22846	0.473732		1.22846	0.407999		1.22846	0.354368
1.23046	0.970262		1.23046	0.880294		1.23046	0.839697		1.23046	0.758286		1.23046	0.640791		1.23046	0.539449		1.23046	0.475166		1.23046	0.408905		1.23046	0.354658
1.23246	0.970469		1.23246	0.881081		1.23246	0.840719		1.23246	0.759714		1.23246	0.642565		1.23246	0.541156		1.23246	0.476589		1.23246	0.409809		1.23246	0.354947
1.23447	0.970671		1.23447	0.881853		1.23447	0.841723		1.23447	0.761117		1.23447	0.644314		1.23447	0.542845		1.23447	0.478004		1.23447	0.41071		1.23447	0.355237
1.23647	0.97087		1.23647	0.882611		1.23647	0.842709		1.23647	0.762497		1.23647	0.646038		1.23647	0.544518		1.23647	0.479408		1.23647	0.411608		1.23647	0.355527
1.23848	0.971065		1.23848	0.883355		1.23848	0.843677		1.23848	0.763853		1.23848	0.647739		1.23848	0.546174		1.23848	0.480803		1.23848	0.412503		1.23848	0.355817
1.24048	0.971256		1.24048	0.884085		1.24048	0.844627		1.24048	0.765187		1.24048	0.649416		1.24048	0.547813		1.24048	0.482188		1.24048	0.413394		1.24048	0.356107
1.24248	0.971443		1.24248	0.884803		1.24248	0.845561		1.24248	0.766499		1.24248	0.651069		1.24248	0.549436		1.24248	0.483563		1.24248	0.414283		1.24248	0.356396
1.24449	0.971627		1.24449	0.885507		1.24449	0.846478		1.24449	0.767789		1.24449	0.652699		1.24449	0.551041		1.24449	0.484928		1.24449	0.415168		1.24449	0.356686
1.24649	0.971808		1.24649	0.886198		1.24649	0.847379		1.24649	0.769057		1.24649	0.654307		1.24649	0.55263		1.24649	0.486282		1.24649	0.416049		1.24649	0.356975
1.2485	0.971985		1.2485	0.886877		1.2485	0.848265		1.2485	0.770305		1.2485	0.655891		1.2485	0.554203		1.2485	0.487627		1.2485	0.416927		1.2485	0.357264
1.2505	0.972159		1.2505	0.887544		1.2505	0.849134		1.2505	0.771532		1.2505	0.657454		1.2505	0.555758		1.2505	0.488961		1.2505	0.417801		1.2505	0.357552
1.25251	0.97233		1.25251	0.888199		1.25251	0.849989		1.25251	0.772738		1.25251	0.658995		1.25251	0.557297		1.25251	0.490284		1.25251	0.418672		1.25251	0.35784
1.25451	0.972497		1.25451	0.888842		1.25451	0.850828		1.25451	0.773925		1.25451	0.660513		1.25451	0.55882		1.25451	0.491597		1.25451	0.419538		1.25451	0.358128
1.25651	0.972661		1.25651	0.889474		1.25651	0.851653		1.25651	0.775093		1.25651	0.662011		1.25651	0.560326		1.25651	0.4929		1.25651	0.4204		1.25651	0.358415
1.25852	0.972823		1.25852	0.890095		1.25852	0.852464		1.25852	0.776241		1.25852	0.663487		1.25852	0.561816		1.25852	0.494191		1.25852	0.421258		1.25852	0.358702
1.26052	0.972981		1.26052	0.890705		1.26052	0.853261		1.26052	0.77737		1.26052	0.664942		1.26052	0.563289		1.26052	0.495473		1.26052	0.422112		1.26052	0.358988
1.26253	0.973137		1.26253	0.891304		1.26253	0.854044		1.26253	0.778481		1.26253	0.666376		1.26253	0.564746		1.26253	0.496743		1.26253	0.422961		1.26253	0.359273
1.26453	0.97329		1.26453	0.891892		1.26453	0.854813		1.26453	0.779574		1.26453	0.667791		1.26453	0.566186		1.26453	0.498002		1.26453	0.423806		1.26453	0.359558
1.26653	0.97344		1.26653	0.892471		1.26653	0.85557		1.26653	0.780648		1.26653	0.669185		1.26653	0.567611		1.26653	0.499251		1.26653	0.424646		1.26653	0.359843
1.26854	0.973587		1.26854	0.893039		1.26854	0.856313		1.26854	0.781706		1.26854	0.670559		1.26854	0.569019		1.26854	0.500488		1.26854	0.425482		1.26854	0.360126
1.27054	0.973732		1.27054	0.893597		1.27054	0.857043		1.27054	0.782746		1.27054	0.671913		1.27054	0.570412		1.27054	0.501715		1.27054	0.426312		1.27054	0.360409
1.27255	0.973874		1.27255	0.894146		1.27255	0.857762		1.27255	0.783769		1.27255	0.673248		1.27255	0.571788		1.27255	0.502931		1.27255	0.427138		1.27255	0.36069
1.27455	0.974013		1.27455	0.894685		1.27455	0.858468		1.27455	0.784776		1.27455	0.674564		1.27455	0.573148		1.27455	0.504135		1.27455	0.427959		1.27455	0.360971
1.27655	0.97415		1.27655	0.895214		1.27655	0.859161		1.27655	0.785766		1.27655	0.67586		1.27655	0.574493		1.27655	0.505329		1.27655	0.428775		1.27655	0.361252
1.27856	0.974285		1.27856	0.895735		1.27856	0.859844		1.27856	0.78674		1.27856	0.677138		1.27856	0.575822		1.27856	0.506511		1.27856	0.429586		1.27856	0.361531
1.28056	0.974417		1.28056	0.896247		1.28056	0.860514		1.28056	0.787698		1.28056	0.678398		1.28056	0.577135		1.28056	0.507682		1.28056	0.430391		1.28056	0.361809
1.28257	0.974547		1.28257	0.896749		1.28257	0.861173		1.28257	0.788641		1.28257	0.679639		1.28257	0.578432		1.28257	0.508842		1.28257	0.431191		1.28257	0.362086
1.28457	0.974674		1.28457	0.897244		1.28457	0.861821		1.28457	0.789569		1.28457	0.680863		1.28457	0.579714		1.28457	0.509991		1.28457	0.431986		1.28457	0.362362
1.28657	0.9748		1.28657	0.897729		1.28657	0.862458		1.28657	0.790481		1.28657	0.682068		1.28657	0.580981		1.28657	0.511128		1.28657	0.432775		1.28657	0.362637
1.28858	0.974923		1.28858	0.898207		1.28858	0.863085		1.28858	0.791379		1.28858	0.683256		1.28858	0.582232		1.28858	0.512255		1.28858	0.433559		1.28858	0.362911
1.29058	0.975044		1.29058	0.898676		1.29058	0.8637		1.29058	0.792262		1.29058	0.684426		1.29058	0.583468		1.29058	0.513369		1.29058	0.434337		1.29058	0.363183
1.29259	0.975163		1.29259	0.899137		1.29259	0.864306		1.29259	0.79313		1.29259	0.685579		1.29259	0.584688		1.29259	0.514473		1.29259	0.43511		1.29259	0.363455
1.29459	0.975279		1.29459	0.89959		1.29459	0.864901		1.29459	0.793985		1.29459	0.686716		1.29459	0.585894		1.29459	0.515565		1.29459	0.435876		1.29459	0.363725
1.29659	0.975394		1.29659	0.900035		1.29659	0.865486		1.29659	0.794826		1.29659	0.687835		1.29659	0.587084		1.29659	0.516646		1.29659	0.436637		1.29659	0.363994
1.2986	0.975507		1.2986	0.900473		1.2986	0.866061		1.2986	0.795652		1.2986	0.688938		1.2986	0.58826		1.2986	0.517716		1.2986	0.437392		1.2986	0.364261
1.3006	0.975617		1.3006	0.900903		1.3006	0.866626		1.3006	0.796466		1.3006	0.690025		1.3006	0.589421		1.3006	0.518774		1.3006	0.438141		1.3006	0.364527
1.30261	0.975726		1.30261	0.901326		1.30261	0.867182		1.30261	0.797266		1.30261	0.691095		1.30261	0.590566		1.30261	0.519821		1.30261	0.438885		1.30261	0.364792
1.30461	0.975833		1.30461	0.901742		1.30461	0.867729		1.30461	0.798053		1.30461	0.692149		1.30461	0.591698		1.30461	0.520857		1.30461	0.439621		1.30461	0.365055
1.30661	0.975938		1.30661	0.902151		1.30661	0.868266		1.30661	0.798828		1.30661	0.693187		1.30661	0.592814		1.30661	0.521881		1.30661	0.440352		1.30661	0.365317
1.30862	0.976041		1.30862	0.902552		1.30862	0.868794		1.30862	0.799589		1.30862	0.69421		1.30862	0.593916		1.30862	0.522894		1.30862	0.441077		1.30862	0.365577
1.31062	0.976142		1.31062	0.902947		1.31062	0.869313		1.31062	0.800338		1.31062	0.695217		1.31062	0.595004		1.31062	0.523896		1.31062	0.441795		1.31062	0.365835
1.31263	0.976242		1.31263	0.903335		1.31263	0.869823		1.31263	0.801075		1.31263	0.696209		1.31263	0.596077		1.31263	0.524886		1.31263	0.442507		1.31263	0.366092
1.31463	0.976339		1.31463	0.903716		1.31463	0.870325		1.31463	0.8018		1.31463	0.697186		1.31463	0.597136		1.31463	0.525865		1.31463	0.443213		1.31463	0.366348
1.31663	0.976435		1.31663	0.90409		1.31663	0.870818		1.31663	0.802512		1.31663	0.698148		1.31663	0.59818		1.31663	0.526832		1.31663	0.443912		1.31663	0.366602
1.31864	0.97653		1.31864	0.904458		1.31864	0.871303		1.31864	0.803213		1.31864	0.699095		1.31864	0.599211		1.31864	0.527788		1.31864	0.444605		1.31864	0.366853
1.32064	0.976623		1.32064	0.90482		1.32064	0.871779		1.32064	0.803902		1.32064	0.700028		1.32064	0.600228		1.32064	0.528733		1.32064	0.445291		1.32064	0.367104
1.32265	0.976714		1.32265	0.905176		1.32265	0.872247		1.32265	0.80458		1.32265	0.700946		1.32265	0.60123		1.32265	0.529667		1.32265	0.445971		1.32265	0.367352
1.32465	0.976803		1.32465	0.905525		1.32465	0.872708		1.32465	0.805246		1.32465	0.701849		1.32465	0.602219		1.32465	0.530589		1.32465	0.446644		1.32465	0.367599
1.32665	0.976891		1.32665	0.905868		1.32665	0.87316		1.32665	0.805901		1.32665	0.702739		1.32665	0.603194		1.32665	0.5315		1.32665	0.44731		1.32665	0.367844
1.32866	0.976977		1.32866	0.906206		1.32866	0.873604		1.32866	0.806546		1.32866	0.703614		1.32866	0.604155		1.32866	0.5324		1.32866	0.44797		1.32866	0.368087
1.33066	0.977062		1.33066	0.906537		1.33066	0.874041		1.33066	0.807179		1.33066	0.704476		1.33066	0.605103		1.33066	0.533288		1.33066	0.448622		1.33066	0.368328
1.33267	0.977145		1.33267	0.906863		1.33267	0.87447		1.33267	0.807802		1.33267	0.705324		1.33267	0.606037		1.33267	0.534165		1.33267	0.449269		1.33267	0.368567
1.33467	0.977227		1.33467	0.907182		1.33467	0.874892		1.33467	0.808414		1.33467	0.706158		1.33467	0.606958		1.33467	0.535031		1.33467	0.449908		1.33467	0.368804
1.33667	0.977307		1.33667	0.907497		1.33667	0.875306		1.33667	0.809015		1.33667	0.706979		1.33667	0.607865		1.33667	0.535886		1.33667	0.45054		1.33667	0.369039
1.33868	0.977386		1.33868	0.907805		1.33868	0.875713		1.33868	0.809606		1.33868	0.707787		1.33868	0.608759		1.33868	0.536729		1.33868	0.451165		1.33868	0.369272
1.34068	0.977464		1.34068	0.908108		1.34068	0.876113		1.34068	0.810187		1.34068	0.708582		1.34068	0.60964		1.34068	0.537561		1.34068	0.451784		1.34068	0.369503
1.34269	0.97754		1.34269	0.908406		1.34269	0.876506		1.34269	0.810758		1.34269	0.709363		1.34269	0.610508		1.34269	0.538382		1.34269	0.452395		1.34269	0.369732
1.34469	0.977614		1.34469	0.908698		1.34469	0.876892		1.34469	0.811319		1.34469	0.710132		1.34469	0.611363		1.34469	0.539192		1.34469	0.452999		1.34469	0.369959
1.34669	0.977687		1.34669	0.908985		1.34669	0.877271		1.34669	0.811871		1.34669	0.710887		1.34669	0.612204		1.34669	0.539991		1.34669	0.453597		1.34669	0.370183
1.3487	0.977759		1.3487	0.909267		1.3487	0.877643		1.3487	0.812412		1.3487	0.711631		1.3487	0.613033		1.3487	0.540779		1.3487	0.454187		1.3487	0.370406
1.3507	0.97783		1.3507	0.909544		1.3507	0.878008		1.3507	0.812944		1.3507	0.712361		1.3507	0.613849		1.3507	0.541555		1.3507	0.45477		1.3507	0.370626
1.35271	0.977899		1.35271	0.909816		1.35271	0.878367		1.35271	0.813467		1.35271	0.71308		1.35271	0.614653		1.35271	0.542321		1.35271	0.455346		1.35271	0.370844
1.35471	0.977967		1.35471	0.910082		1.35471	0.878719		1.35471	0.81398		1.35471	0.713786		1.35471	0.615443		1.35471	0.543075		1.35471	0.455914		1.35471	0.37106
1.35671	0.978034		1.35671	0.910344		1.35671	0.879065		1.35671	0.814484		1.35671	0.714479		1.35671	0.616221		1.35671	0.543818		1.35671	0.456475		1.35671	0.371273
1.35872	0.978099		1.35872	0.910601		1.35872	0.879404		1.35872	0.814978		1.35872	0.715161		1.35872	0.616987		1.35872	0.544551		1.35872	0.45703		1.35872	0.371484
1.36072	0.978164		1.36072	0.910853		1.36072	0.879737		1.36072	0.815464		1.36072	0.715831		1.36072	0.61774		1.36072	0.545272		1.36072	0.457576		1.36072	0.371693
1.36273	0.978227		1.36273	0.9111		1.36273	0.880064		1.36273	0.815941		1.36273	0.716489		1.36273	0.61848		1.36273	0.545983		1.36273	0.458116		1.36273	0.371899
1.36473	0.978288		1.36473	0.911343		1.36473	0.880384		1.36473	0.816409		1.36473	0.717135		1.36473	0.619209		1.36473	0.546682		1.36473	0.458648		1.36473	0.372103
1.36673	0.978349		1.36673	0.911581		1.36673	0.880699		1.36673	0.816868		1.36673	0.71777		1.36673	0.619925		1.36673	0.547371		1.36673	0.459173		1.36673	0.372305
1.36874	0.978408		1.36874	0.911814		1.36874	0.881007		1.36874	0.817318		1.36874	0.718393		1.36874	0.620628		1.36874	0.548048		1.36874	0.45969		1.36874	0.372504
1.37074	0.978467		1.37074	0.912043		1.37074	0.88131		1.37074	0.81776		1.37074	0.719005		1.37074	0.62132		1.37074	0.548715		1.37074	0.4602		1.37074	0.3727
1.37275	0.978524		1.37275	0.912267		1.37275	0.881607		1.37275	0.818194		1.37275	0.719605		1.37275	0.622		1.37275	0.549371		1.37275	0.460702		1.37275	0.372894
1.37475	0.97858		1.37475	0.912487		1.37475	0.881897		1.37475	0.818619		1.37475	0.720194		1.37475	0.622668		1.37475	0.550016		1.37475	0.461197		1.37475	0.373086
1.37675	0.978634		1.37675	0.912703		1.37675	0.882182		1.37675	0.819035		1.37675	0.720772		1.37675	0.623324		1.37675	0.55065		1.37675	0.461685		1.37675	0.373275
1.37876	0.978688		1.37876	0.912914		1.37876	0.882462		1.37876	0.819444		1.37876	0.721339		1.37876	0.623967		1.37876	0.551273		1.37876	0.462164		1.37876	0.373461
1.38076	0.978741		1.38076	0.913121		1.38076	0.882735		1.38076	0.819844		1.38076	0.721895		1.38076	0.6246		1.38076	0.551886		1.38076	0.462637		1.38076	0.373645
1.38277	0.978792		1.38277	0.913324		1.38277	0.883004		1.38277	0.820237		1.38277	0.722441		1.38277	0.62522		1.38277	0.552488		1.38277	0.463102		1.38277	0.373826
1.38477	0.978843		1.38477	0.913522		1.38477	0.883266		1.38477	0.820621		1.38477	0.722975		1.38477	0.625829		1.38477	0.553079		1.38477	0.463559		1.38477	0.374005
1.38677	0.978892		1.38677	0.913717		1.38677	0.883523		1.38677	0.820997		1.38677	0.723499		1.38677	0.626426		1.38677	0.55366		1.38677	0.464009		1.38677	0.37418
1.38878	0.97894		1.38878	0.913907		1.38878	0.883775		1.38878	0.821366		1.38878	0.724012		1.38878	0.627012		1.38878	0.55423		1.38878	0.464451		1.38878	0.374354
1.39078	0.978988		1.39078	0.914093		1.39078	0.884021		1.39078	0.821727		1.39078	0.724514		1.39078	0.627586		1.39078	0.554789		1.39078	0.464885		1.39078	0.374524
1.39279	0.979034		1.39279	0.914275		1.39279	0.884262		1.39279	0.82208		1.39279	0.725006		1.39279	0.628149		1.39279	0.555337		1.39279	0.465312		1.39279	0.374692
1.39479	0.979079		1.39479	0.914453		1.39479	0.884498		1.39479	0.822425		1.39479	0.725488		1.39479	0.6287		1.39479	0.555875		1.39479	0.465731		1.39479	0.374857
1.39679	0.979123		1.39679	0.914627		1.39679	0.884729		1.39679	0.822763		1.39679	0.72596		1.39679	0.62924		1.39679	0.556403		1.39679	0.466142		1.39679	0.375019
1.3988	0.979166		1.3988	0.914798		1.3988	0.884954		1.3988	0.823094		1.3988	0.726421		1.3988	0.629769		1.3988	0.55692		1.3988	0.466546		1.3988	0.375178
1.4008	0.979209		1.4008	0.914964		1.4008	0.885174		1.4008	0.823417		1.4008	0.726872		1.4008	0.630286		1.4008	0.557426		1.4008	0.466942		1.4008	0.375335
1.40281	0.97925		1.40281	0.915126		1.40281	0.885389		1.40281	0.823732		1.40281	0.727313		1.40281	0.630792		1.40281	0.557922		1.40281	0.46733		1.40281	0.375489
1.40481	0.97929		1.40481	0.915285		1.40481	0.8856		1.40481	0.82404		1.40481	0.727744		1.40481	0.631288		1.40481	0.558407		1.40481	0.46771		1.40481	0.37564
1.40681	0.979329		1.40681	0.91544		1.40681	0.885805		1.40681	0.824341		1.40681	0.728165		1.40681	0.631772		1.40681	0.558882		1.40681	0.468083		1.40681	0.375788
1.40882	0.979368		1.40882	0.915591		1.40882	0.886005		1.40882	0.824635		1.40882	0.728576		1.40882	0.632245		1.40882	0.559346		1.40882	0.468448		1.40882	0.375933
1.41082	0.979405		1.41082	0.915739		1.41082	0.8862		1.41082	0.824922		1.41082	0.728977		1.41082	0.632707		1.41082	0.5598		1.41082	0.468805		1.41082	0.376075
1.41283	0.979442		1.41283	0.915882		1.41283	0.886391		1.41283	0.825202		1.41283	0.729369		1.41283	0.633158		1.41283	0.560244		1.41283	0.469155		1.41283	0.376214
1.41483	0.979477		1.41483	0.916023		1.41483	0.886576		1.41483	0.825474		1.41483	0.72975		1.41483	0.633598		1.41483	0.560677		1.41483	0.469496		1.41483	0.376351
1.41683	0.979512		1.41683	0.916159		1.41683	0.886757		1.41683	0.82574		1.41683	0.730122		1.41683	0.634028		1.41683	0.5611		1.41683	0.46983		1.41683	0.376484
1.41884	0.979545		1.41884	0.916292		1.41884	0.886933		1.41884	0.825998		1.41884	0.730485		1.41884	0.634446		1.41884	0.561512		1.41884	0.470156		1.41884	0.376615
1.42084	0.979578		1.42084	0.916421		1.42084	0.887104		1.42084	0.82625		1.42084	0.730838		1.42084	0.634854		1.42084	0.561914		1.42084	0.470474		1.42084	0.376742
1.42285	0.97961		1.42285	0.916547		1.42285	0.887271		1.42285	0.826495		1.42285	0.731181		1.42285	0.635251		1.42285	0.562306		1.42285	0.470784		1.42285	0.376867
1.42485	0.979641		1.42485	0.916669		1.42485	0.887433		1.42485	0.826733		1.42485	0.731516		1.42485	0.635638		1.42485	0.562687		1.42485	0.471087		1.42485	0.376988
1.42685	0.979671		1.42685	0.916788		1.42685	0.88759		1.42685	0.826964		1.42685	0.73184		1.42685	0.636014		1.42685	0.563058		1.42685	0.471381		1.42685	0.377107
1.42886	0.9797		1.42886	0.916903		1.42886	0.887743		1.42886	0.827188		1.42886	0.732156		1.42886	0.636379		1.42886	0.563419		1.42886	0.471668		1.42886	0.377222
1.43086	0.979729		1.43086	0.917015		1.43086	0.887891		1.43086	0.827406		1.43086	0.732462		1.43086	0.636734		1.43086	0.56377		1.43086	0.471947		1.43086	0.377335
1.43287	0.979756		1.43287	0.917123		1.43287	0.888035		1.43287	0.827618		1.43287	0.732758		1.43287	0.637078		1.43287	0.564111		1.43287	0.472218		1.43287	0.377444
1.43487	0.979783		1.43487	0.917228		1.43487	0.888174		1.43487	0.827822		1.43487	0.733046		1.43487	0.637412		1.43487	0.564441		1.43487	0.472481		1.43487	0.37755
1.43687	0.979808		1.43687	0.91733		1.43687	0.888309		1.43687	0.82802		1.43687	0.733325		1.43687	0.637735		1.43687	0.564761		1.43687	0.472736		1.43687	0.377653
1.43888	0.979833		1.43888	0.917428		1.43888	0.888439		1.43888	0.828212		1.43888	0.733594		1.43888	0.638047		1.43888	0.565071		1.43888	0.472983		1.43888	0.377753
1.44088	0.979857		1.44088	0.917523		1.44088	0.888564		1.44088	0.828397		1.44088	0.733854		1.44088	0.63835		1.44088	0.565371		1.44088	0.473222		1.44088	0.37785
1.44289	0.97988		1.44289	0.917614		1.44289	0.888686		1.44289	0.828575		1.44289	0.734105		1.44289	0.638642		1.44289	0.56566		1.44289	0.473454		1.44289	0.377944
1.44489	0.979903		1.44489	0.917703		1.44489	0.888803		1.44489	0.828747		1.44489	0.734348		1.44489	0.638923		1.44489	0.56594		1.44489	0.473677		1.44489	0.378035
1.44689	0.979924		1.44689	0.917787		1.44689	0.888915		1.44689	0.828913		1.44689	0.734581		1.44689	0.639195		1.44689	0.566209		1.44689	0.473893		1.44689	0.378122
1.4489	0.979945		1.4489	0.917869		1.4489	0.889024		1.4489	0.829072		1.4489	0.734805		1.4489	0.639456		1.4489	0.566469		1.4489	0.4741		1.4489	0.378207
1.4509	0.979965		1.4509	0.917947		1.4509	0.889127		1.4509	0.829225		1.4509	0.735021		1.4509	0.639707		1.4509	0.566718		1.4509	0.4743		1.4509	0.378288
1.45291	0.979984		1.45291	0.918022		1.45291	0.889227		1.45291	0.829372		1.45291	0.735227		1.45291	0.639947		1.45291	0.566957		1.45291	0.474492		1.45291	0.378366
1.45491	0.980002		1.45491	0.918094		1.45491	0.889322		1.45491	0.829512		1.45491	0.735425		1.45491	0.640178		1.45491	0.567186		1.45491	0.474675		1.45491	0.378441
1.45691	0.980019		1.45691	0.918163		1.45691	0.889413		1.45691	0.829646		1.45691	0.735614		1.45691	0.640398		1.45691	0.567405		1.45691	0.474851		1.45691	0.378512
1.45892	0.980036		1.45892	0.918228		1.45892	0.8895		1.45892	0.829774		1.45892	0.735794		1.45892	0.640608		1.45892	0.567614		1.45892	0.475019		1.45892	0.378581
1.46092	0.980051		1.46092	0.918291		1.46092	0.889583		1.46092	0.829895		1.46092	0.735966		1.46092	0.640808		1.46092	0.567813		1.46092	0.475179		1.46092	0.378646
1.46293	0.980066		1.46293	0.91835		1.46293	0.889661		1.46293	0.830011		1.46293	0.736128		1.46293	0.640998		1.46293	0.568002		1.46293	0.475331		1.46293	0.378708
1.46493	0.98008		1.46493	0.918406		1.46493	0.889735		1.46493	0.83012		1.46493	0.736282		1.46493	0.641177		1.46493	0.568181		1.46493	0.475475		1.46493	0.378767
1.46693	0.980094		1.46693	0.918458		1.46693	0.889805		1.46693	0.830223		1.46693	0.736428		1.46693	0.641347		1.46693	0.56835		1.46693	0.47561		1.46693	0.378823
1.46894	0.980106		1.46894	0.918508		1.46894	0.889871		1.46894	0.83032		1.46894	0.736564		1.46894	0.641506		1.46894	0.568509		1.46894	0.475738		1.46894	0.378875
1.47094	0.980118		1.47094	0.918554		1.47094	0.889932		1.47094	0.83041		1.47094	0.736693		1.47094	0.641656		1.47094	0.568658		1.47094	0.475858		1.47094	0.378924
1.47295	0.980129		1.47295	0.918598		1.47295	0.88999		1.47295	0.830495		1.47295	0.736812		1.47295	0.641795		1.47295	0.568797		1.47295	0.47597		1.47295	0.37897
1.47495	0.980139		1.47495	0.918638		1.47495	0.890043		1.47495	0.830574		1.47495	0.736923		1.47495	0.641925		1.47495	0.568926		1.47495	0.476074		1.47495	0.379012
1.47695	0.980149		1.47695	0.918675		1.47695	0.890092		1.47695	0.830646		1.47695	0.737025		1.47695	0.642044		1.47695	0.569045		1.47695	0.47617		1.47695	0.379052
1.47896	0.980157		1.47896	0.918709		1.47896	0.890137		1.47896	0.830712		1.47896	0.737119		1.47896	0.642154		1.47896	0.569154		1.47896	0.476258		1.47896	0.379088
1.48096	0.980165		1.48096	0.91874		1.48096	0.890178		1.48096	0.830772		1.48096	0.737204		1.48096	0.642253		1.48096	0.569254		1.48096	0.476338		1.48096	0.379121
1.48297	0.980172		1.48297	0.918767		1.48297	0.890215		1.48297	0.830827		1.48297	0.73728		1.48297	0.642342		1.48297	0.569343		1.48297	0.47641		1.48297	0.37915
1.48497	0.980178		1.48497	0.918792		1.48497	0.890248		1.48497	0.830875		1.48497	0.737348		1.48497	0.642422		1.48497	0.569422		1.48497	0.476474		1.48497	0.379176
1.48697	0.980184		1.48697	0.918813		1.48697	0.890276		1.48697	0.830917		1.48697	0.737408		1.48697	0.642492		1.48697	0.569492		1.48697	0.47653		1.48697	0.379199
1.48898	0.980188		1.48898	0.918832		1.48898	0.890301		1.48898	0.830953		1.48898	0.737459		1.48898	0.642551		1.48898	0.569551		1.48898	0.476578		1.48898	0.379219
1.49098	0.980192		1.49098	0.918847		1.49098	0.890321		1.49098	0.830983		1.49098	0.737501		1.49098	0.642601		1.49098	0.569601		1.49098	0.476618		1.49098	0.379236
1.49299	0.980195		1.49299	0.91886		1.49299	0.890337		1.49299	0.831007		1.49299	0.737535		1.49299	0.642641		1.49299	0.56964		1.49299	0.47665		1.49299	0.379249
1.49499	0.980198		1.49499	0.918869		1.49499	0.89035		1.49499	0.831025		1.49499	0.737561		1.49499	0.64267		1.49499	0.56967		1.49499	0.476674		1.49499	0.379259
1.49699	0.980199		1.49699	0.918875		1.49699	0.890358		1.49699	0.831037		1.49699	0.737578		1.49699	0.64269		1.49699	0.56969		1.49699	0.47669		1.49699	0.379265
1.499	0.9802		1.499	0.918878		1.499	0.890362		1.499	0.831043		1.499	0.737586		1.499	0.6427		1.499	0.5697		1.499	0.476698		1.499	0.379268
1.501	0.9802		1.501	0.918878		1.501	0.890362		1.501	0.831043		1.501	0.737586		1.501	0.6427		1.501	0.5697		1.501	0.476698		1.501	0.379268
1.50301	0.980199		1.50301	0.918875		1.50301	0.890358		1.50301	0.831037		1.50301	0.737578		1.50301	0.64269		1.50301	0.56969		1.50301	0.47669		1.50301	0.379265
1.50501	0.980198		1.50501	0.918869		1.50501	0.89035		1.50501	0.831025		1.50501	0.737561		1.50501	0.64267		1.50501	0.56967		1.50501	0.476674		1.50501	0.379259
1.50701	0.980195		1.50701	0.91886		1.50701	0.890337		1.50701	0.831007		1.50701	0.737535		1.50701	0.642641		1.50701	0.56964		1.50701	0.47665		1.50701	0.379249
1.50902	0.980192		1.50902	0.918847		1.50902	0.890321		1.50902	0.830983		1.50902	0.737501		1.50902	0.642601		1.50902	0.569601		1.50902	0.476618		1.50902	0.379236
1.51102	0.980188		1.51102	0.918832		1.51102	0.890301		1.51102	0.830953		1.51102	0.737459		1.51102	0.642551		1.51102	0.569551		1.51102	0.476578		1.51102	0.379219
1.51303	0.980184		1.51303	0.918813		1.51303	0.890276		1.51303	0.830917		1.51303	0.737408		1.51303	0.642492		1.51303	0.569492		1.51303	0.47653		1.51303	0.379199
1.51503	0.980178		1.51503	0.918792		1.51503	0.890248		1.51503	0.830875		1.51503	0.737348		1.51503	0.642422		1.51503	0.569422		1.51503	0.476474		1.51503	0.379176
1.51703	0.980172		1.51703	0.918767		1.51703	0.890215		1.51703	0.830827		1.51703	0.73728		1.51703	0.642342		1.51703	0.569343		1.51703	0.47641		1.51703	0.37915
1.51904	0.980165		1.51904	0.91874		1.51904	0.890178		1.51904	0.830772		1.51904	0.737204		1.51904	0.642253		1.51904	0.569254		1.51904	0.476338		1.51904	0.379121
1.52104	0.980157		1.52104	0.918709		1.52104	0.890137		1.52104	0.830712		1.52104	0.737119		1.52104	0.642154		1.52104	0.569154		1.52104	0.476258		1.52104	0.379088
1.52305	0.980149		1.52305	0.918675		1.52305	0.890092		1.52305	0.830646		1.52305	0.737025		1.52305	0.642044		1.52305	0.569045		1.52305	0.47617		1.52305	0.379052
1.52505	0.980139		1.52505	0.918638		1.52505	0.890043		1.52505	0.830574		1.52505	0.736923		1.52505	0.641925		1.52505	0.568926		1.52505	0.476074		1.52505	0.379012
1.52705	0.980129		1.52705	0.918598		1.52705	0.88999		1.52705	0.830495		1.52705	0.736812		1.52705	0.641795		1.52705	0.568797		1.52705	0.47597		1.52705	0.37897
1.52906	0.980118		1.52906	0.918554		1.52906	0.889932		1.52906	0.83041		1.52906	0.736693		1.52906	0.641656		1.52906	0.568658		1.52906	0.475858		1.52906	0.378924
1.53106	0.980106		1.53106	0.918508		1.53106	0.889871		1.53106	0.83032		1.53106	0.736564		1.53106	0.641506		1.53106	0.568509		1.53106	0.475738		1.53106	0.378875
1.53307	0.980094		1.53307	0.918458		1.53307	0.889805		1.53307	0.830223		1.53307	0.736428		1.53307	0.641347		1.53307	0.56835		1.53307	0.47561		1.53307	0.378823
1.53507	0.98008		1.53507	0.918406		1.53507	0.889735		1.53507	0.83012		1.53507	0.736282		1.53507	0.641177		1.53507	0.568181		1.53507	0.475475		1.53507	0.378767
1.53707	0.980066		1.53707	0.91835		1.53707	0.889661		1.53707	0.830011		1.53707	0.736128		1.53707	0.640998		1.53707	0.568002		1.53707	0.475331		1.53707	0.378708
1.53908	0.980051		1.53908	0.918291		1.53908	0.889583		1.53908	0.829895		1.53908	0.735966		1.53908	0.640808		1.53908	0.567813		1.53908	0.475179		1.53908	0.378646
1.54108	0.980036		1.54108	0.918228		1.54108	0.8895		1.54108	0.829774		1.54108	0.735794		1.54108	0.640608		1.54108	0.567614		1.54108	0.475019		1.54108	0.378581
1.54309	0.980019		1.54309	0.918163		1.54309	0.889413		1.54309	0.829646		1.54309	0.735614		1.54309	0.640398		1.54309	0.567405		1.54309	0.474851		1.54309	0.378512
1.54509	0.980002		1.54509	0.918094		1.54509	0.889322		1.54509	0.829512		1.54509	0.735425		1.54509	0.640178		1.54509	0.567186		1.54509	0.474675		1.54509	0.378441
1.54709	0.979984		1.54709	0.918022		1.54709	0.889227		1.54709	0.829372		1.54709	0.735227		1.54709	0.639947		1.54709	0.566957		1.54709	0.474492		1.54709	0.378366
1.5491	0.979965		1.5491	0.917947		1.5491	0.889127		1.5491	0.829225		1.5491	0.735021		1.5491	0.639707		1.5491	0.566718		1.5491	0.4743		1.5491	0.378288
1.5511	0.979945		1.5511	0.917869		1.5511	0.889024		1.5511	0.829072		1.5511	0.734805		1.5511	0.639456		1.5511	0.566469		1.5511	0.4741		1.5511	0.378207
1.55311	0.979924		1.55311	0.917787		1.55311	0.888915		1.55311	0.828913		1.55311	0.734581		1.55311	0.639195		1.55311	0.566209		1.55311	0.473893		1.55311	0.378122
1.55511	0.979903		1.55511	0.917703		1.55511	0.888803		1.55511	0.828747		1.55511	0.734348		1.55511	0.638923		1.55511	0.56594		1.55511	0.473677		1.55511	0.378035
1.55711	0.97988		1.55711	0.917614		1.55711	0.888686		1.55711	0.828575		1.55711	0.734105		1.55711	0.638642		1.55711	0.56566		1.55711	0.473454		1.55711	0.377944
1.55912	0.979857		1.55912	0.917523		1.55912	0.888564		1.55912	0.828397		1.55912	0.733854		1.55912	0.63835		1.55912	0.565371		1.55912	0.473222		1.55912	0.37785
1.56112	0.979833		1.56112	0.917428		1.56112	0.888439		1.56112	0.828212		1.56112	0.733594		1.56112	0.638047		1.56112	0.565071		1.56112	0.472983		1.56112	0.377753
1.56313	0.979808		1.56313	0.91733		1.56313	0.888309		1.56313	0.82802		1.56313	0.733325		1.56313	0.637735		1.56313	0.564761		1.56313	0.472736		1.56313	0.377653
1.56513	0.979783		1.56513	0.917228		1.56513	0.888174		1.56513	0.827822		1.56513	0.733046		1.56513	0.637412		1.56513	0.564441		1.56513	0.472481		1.56513	0.37755
1.56713	0.979756		1.56713	0.917123		1.56713	0.888035		1.56713	0.827618		1.56713	0.732758		1.56713	0.637078		1.56713	0.564111		1.56713	0.472218		1.56713	0.377444
1.56914	0.979729		1.56914	0.917015		1.56914	0.887891		1.56914	0.827406		1.56914	0.732462		1.56914	0.636734		1.56914	0.56377		1.56914	0.471947		1.56914	0.377335
1.57114	0.9797		1.57114	0.916903		1.57114	0.887743		1.57114	0.827188		1.57114	0.732156		1.57114	0.636379		1.57114	0.563419		1.57114	0.471668		1.57114	0.377222
1.57315	0.979671		1.57315	0.916788		1.57315	0.88759		1.57315	0.826964		1.57315	0.73184		1.57315	0.636014		1.57315	0.563058		1.57315	0.471381		1.57315	0.377107
1.57515	0.979641		1.57515	0.916669		1.57515	0.887433		1.57515	0.826733		1.57515	0.731516		1.57515	0.635638		1.57515	0.562687		1.57515	0.471087		1.57515	0.376988
1.57715	0.97961		1.57715	0.916547		1.57715	0.887271		1.57715	0.826495		1.57715	0.731181		1.57715	0.635251		1.57715	0.562306		1.57715	0.470784		1.57715	0.376867
1.57916	0.979578		1.57916	0.916421		1.57916	0.887104		1.57916	0.82625		1.57916	0.730838		1.57916	0.634854		1.57916	0.561914		1.57916	0.470474		1.57916	0.376742
1.58116	0.979545		1.58116	0.916292		1.58116	0.886933		1.58116	0.825998		1.58116	0.730485		1.58116	0.634446		1.58116	0.561512		1.58116	0.470156		1.58116	0.376615
1.58317	0.979512		1.58317	0.916159		1.58317	0.886757		1.58317	0.82574		1.58317	0.730122		1.58317	0.634028		1.58317	0.5611		1.58317	0.46983		1.58317	0.376484
1.58517	0.979477		1.58517	0.916023		1.58517	0.886576		1.58517	0.825474		1.58517	0.72975		1.58517	0.633598		1.58517	0.560677		1.58517	0.469496		1.58517	0.376351
1.58717	0.979442		1.58717	0.915882		1.58717	0.886391		1.58717	0.825202		1.58717	0.729369		1.58717	0.633158		1.58717	0.560244		1.58717	0.469155		1.58717	0.376214
1.58918	0.979405		1.58918	0.915739		1.58918	0.8862		1.58918	0.824922		1.58918	0.728977		1.58918	0.632707		1.58918	0.5598		1.58918	0.468805		1.58918	0.376075
1.59118	0.979368		1.59118	0.915591		1.59118	0.886005		1.59118	0.824635		1.59118	0.728576		1.59118	0.632245		1.59118	0.559346		1.59118	0.468448		1.59118	0.375933
1.59319	0.979329		1.59319	0.91544		1.59319	0.885805		1.59319	0.824341		1.59319	0.728165		1.59319	0.631772		1.59319	0.558882		1.59319	0.468083		1.59319	0.375788
1.59519	0.97929		1.59519	0.915285		1.59519	0.8856		1.59519	0.82404		1.59519	0.727744		1.59519	0.631288		1.59519	0.558407		1.59519	0.46771		1.59519	0.37564
1.59719	0.97925		1.59719	0.915126		1.59719	0.885389		1.59719	0.823732		1.59719	0.727313		1.59719	0.630792		1.59719	0.557922		1.59719	0.46733		1.59719	0.375489
1.5992	0.979209		1.5992	0.914964		1.5992	0.885174		1.5992	0.823417		1.5992	0.726872		1.5992	0.630286		1.5992	0.557426		1.5992	0.466942		1.5992	0.375335
1.6012	0.979166		1.6012	0.914798		1.6012	0.884954		1.6012	0.823094		1.6012	0.726421		1.6012	0.629769		1.6012	0.55692		1.6012	0.466546		1.6012	0.375178
1.60321	0.979123		1.60321	0.914627		1.60321	0.884729		1.60321	0.822763		1.60321	0.72596		1.60321	0.62924		1.60321	0.556403		1.60321	0.466142		1.60321	0.375019
1.60521	0.979079		1.60521	0.914453		1.60521	0.884498		1.60521	0.822425		1.60521	0.725488		1.60521	0.6287		1.60521	0.555875		1.60521	0.465731		1.60521	0.374857
1.60721	0.979034		1.60721	0.914275		1.60721	0.884262		1.60721	0.82208		1.60721	0.725006		1.60721	0.628149		1.60721	0.555337		1.60721	0.465312		1.60721	0.374692
1.60922	0.978988		1.60922	0.914093		1.60922	0.884021		1.60922	0.821727		1.60922	0.724514		1.60922	0.627586		1.60922	0.554789		1.60922	0.464885		1.60922	0.374524
1.61122	0.97894		1.61122	0.913907		1.61122	0.883775		1.61122	0.821366		1.61122	0.724012		1.61122	0.627012		1.61122	0.55423		1.61122	0.464451		1.61122	0.374354
1.61323	0.978892		1.61323	0.913717		1.61323	0.883523		1.61323	0.820997		1.61323	0.723499		1.61323	0.626426		1.61323	0.55366		1.61323	0.464009		1.61323	0.37418
1.61523	0.978843		1.61523	0.913522		1.61523	0.883266		1.61523	0.820621		1.61523	0.722975		1.61523	0.625829		1.61523	0.553079		1.61523	0.463559		1.61523	0.374005
1.61723	0.978792		1.61723	0.913324		1.61723	0.883004		1.61723	0.820237		1.61723	0.722441		1.61723	0.62522		1.61723	0.552488		1.61723	0.463102		1.61723	0.373826
1.61924	0.978741		1.61924	0.913121		1.61924	0.882735		1.61924	0.819844		1.61924	0.721895		1.61924	0.6246		1.61924	0.551886		1.61924	0.462637		1.61924	0.373645
1.62124	0.978688		1.62124	0.912914		1.62124	0.882462		1.62124	0.819444		1.62124	0.721339		1.62124	0.623967		1.62124	0.551273		1.62124	0.462164		1.62124	0.373461
1.62325	0.978634		1.62325	0.912703		1.62325	0.882182		1.62325	0.819035		1.62325	0.720772		1.62325	0.623324		1.62325	0.55065		1.62325	0.461685		1.62325	0.373275
1.62525	0.97858		1.62525	0.912487		1.62525	0.881897		1.62525	0.818619		1.62525	0.720194		1.62525	0.622668		1.62525	0.550016		1.62525	0.461197		1.62525	0.373086
1.62725	0.978524		1.62725	0.912267		1.62725	0.881607		1.62725	0.818194		1.62725	0.719605		1.62725	0.622		1.62725	0.549371		1.62725	0.460702		1.62725	0.372894
1.62926	0.978467		1.62926	0.912043		1.62926	0.88131		1.62926	0.81776		1.62926	0.719005		1.62926	0.62132		1.62926	0.548715		1.62926	0.4602		1.62926	0.3727
1.63126	0.978408		1.63126	0.911814		1.63126	0.881007		1.63126	0.817318		1.63126	0.718393		1.63126	0.620628		1.63126	0.548048		1.63126	0.45969		1.63126	0.372504
1.63327	0.978349		1.63327	0.911581		1.63327	0.880699		1.63327	0.816868		1.63327	0.71777		1.63327	0.619925		1.63327	0.547371		1.63327	0.459173		1.63327	0.372305
1.63527	0.978288		1.63527	0.911343		1.63527	0.880384		1.63527	0.816409		1.63527	0.717135		1.63527	0.619209		1.63527	0.546682		1.63527	0.458648		1.63527	0.372103
1.63727	0.978227		1.63727	0.9111		1.63727	0.880064		1.63727	0.815941		1.63727	0.716489		1.63727	0.61848		1.63727	0.545983		1.63727	0.458116		1.63727	0.371899
1.63928	0.978164		1.63928	0.910853		1.63928	0.879737		1.63928	0.815464		1.63928	0.715831		1.63928	0.61774		1.63928	0.545272		1.63928	0.457576		1.63928	0.371693
1.64128	0.978099		1.64128	0.910601		1.64128	0.879404		1.64128	0.814978		1.64128	0.715161		1.64128	0.616987		1.64128	0.544551		1.64128	0.45703		1.64128	0.371484
1.64329	0.978034		1.64329	0.910344		1.64329	0.879065		1.64329	0.814484		1.64329	0.714479		1.64329	0.616221		1.64329	0.543818		1.64329	0.456475		1.64329	0.371273
1.64529	0.977967		1.64529	0.910082		1.64529	0.878719		1.64529	0.81398		1.64529	0.713786		1.64529	0.615443		1.64529	0.543075		1.64529	0.455914		1.64529	0.37106
1.64729	0.977899		1.64729	0.909816		1.64729	0.878367		1.64729	0.813467		1.64729	0.71308		1.64729	0.614653		1.64729	0.542321		1.64729	0.455346		1.64729	0.370844
1.6493	0.97783		1.6493	0.909544		1.6493	0.878008		1.6493	0.812944		1.6493	0.712361		1.6493	0.613849		1.6493	0.541555		1.6493	0.45477		1.6493	0.370626
1.6513	0.977759		1.6513	0.909267		1.6513	0.877643		1.6513	0.812412		1.6513	0.711631		1.6513	0.613033		1.6513	0.540779		1.6513	0.454187		1.6513	0.370406
1.65331	0.977687		1.65331	0.908985		1.65331	0.877271		1.65331	0.811871		1.65331	0.710887		1.65331	0.612204		1.65331	0.539991		1.65331	0.453597		1.65331	0.370183
1.65531	0.977614		1.65531	0.908698		1.65531	0.876892		1.65531	0.811319		1.65531	0.710132		1.65531	0.611363		1.65531	0.539192		1.65531	0.452999		1.65531	0.369959
1.65731	0.97754		1.65731	0.908406		1.65731	0.876506		1.65731	0.810758		1.65731	0.709363		1.65731	0.610508		1.65731	0.538382		1.65731	0.452395		1.65731	0.369732
1.65932	0.977464		1.65932	0.908108		1.65932	0.876113		1.65932	0.810187		1.65932	0.708582		1.65932	0.60964		1.65932	0.537561		1.65932	0.451784		1.65932	0.369503
1.66132	0.977386		1.66132	0.907805		1.66132	0.875713		1.66132	0.809606		1.66132	0.707787		1.66132	0.608759		1.66132	0.536729		1.66132	0.451165		1.66132	0.369272
1.66333	0.977307		1.66333	0.907497		1.66333	0.875306		1.66333	0.809015		1.66333	0.706979		1.66333	0.607865		1.66333	0.535886		1.66333	0.45054		1.66333	0.369039
1.66533	0.977227		1.66533	0.907182		1.66533	0.874892		1.66533	0.808414		1.66533	0.706158		1.66533	0.606958		1.66533	0.535031		1.66533	0.449908		1.66533	0.368804
1.66733	0.977145		1.66733	0.906863		1.66733	0.87447		1.66733	0.807802		1.66733	0.705324		1.66733	0.606037		1.66733	0.534165		1.66733	0.449269		1.66733	0.368567
1.66934	0.977062		1.66934	0.906537		1.66934	0.874041		1.66934	0.807179		1.66934	0.704476		1.66934	0.605103		1.66934	0.533288		1.66934	0.448622		1.66934	0.368328
1.67134	0.976977		1.67134	0.906206		1.67134	0.873604		1.67134	0.806546		1.67134	0.703614		1.67134	0.604155		1.67134	0.5324		1.67134	0.44797		1.67134	0.368087
1.67335	0.976891		1.67335	0.905868		1.67335	0.87316		1.67335	0.805901		1.67335	0.702739		1.67335	0.603194		1.67335	0.5315		1.67335	0.44731		1.67335	0.367844
1.67535	0.976803		1.67535	0.905525		1.67535	0.872708		1.67535	0.805246		1.67535	0.701849		1.67535	0.602219		1.67535	0.530589		1.67535	0.446644		1.67535	0.367599
1.67735	0.976714		1.67735	0.905176		1.67735	0.872247		1.67735	0.80458		1.67735	0.700946		1.67735	0.60123		1.67735	0.529667		1.67735	0.445971		1.67735	0.367352
1.67936	0.976623		1.67936	0.90482		1.67936	0.871779		1.67936	0.803902		1.67936	0.700028		1.67936	0.600228		1.67936	0.528733		1.67936	0.445291		1.67936	0.367104
1.68136	0.97653		1.68136	0.904458		1.68136	0.871303		1.68136	0.803213		1.68136	0.699095		1.68136	0.599211		1.68136	0.527788		1.68136	0.444605		1.68136	0.366853
1.68337	0.976435		1.68337	0.90409		1.68337	0.870818		1.68337	0.802512		1.68337	0.698148		1.68337	0.59818		1.68337	0.526832		1.68337	0.443912		1.68337	0.366602
1.68537	0.976339		1.68537	0.903716		1.68537	0.870325		1.68537	0.8018		1.68537	0.697186		1.68537	0.597136		1.68537	0.525865		1.68537	0.443213		1.68537	0.366348
1.68737	0.976242		1.68737	0.903335		1.68737	0.869823		1.68737	0.801075		1.68737	0.696209		1.68737	0.596077		1.68737	0.524886		1.68737	0.442507		1.68737	0.366092
1.68938	0.976142		1.68938	0.902947		1.68938	0.869313		1.68938	0.800338		1.68938	0.695217		1.68938	0.595004		1.68938	0.523896		1.68938	0.441795		1.68938	0.365835
1.69138	0.976041		1.69138	0.902552		1.69138	0.868794		1.69138	0.799589		1.69138	0.69421		1.69138	0.593916		1.69138	0.522894		1.69138	0.441077		1.69138	0.365577
1.69339	0.975938		1.69339	0.902151		1.69339	0.868266		1.69339	0.798828		1.69339	0.693187		1.69339	0.592814		1.69339	0.521881		1.69339	0.440352		1.69339	0.365317
1.69539	0.975833		1.69539	0.901742		1.69539	0.867729		1.69539	0.798053		1.69539	0.692149		1.69539	0.591698		1.69539	0.520857		1.69539	0.439621		1.69539	0.365055
1.69739	0.975726		1.69739	0.901326		1.69739	0.867182		1.69739	0.797266		1.69739	0.691095		1.69739	0.590566		1.69739	0.519821		1.69739	0.438885		1.69739	0.364792
1.6994	0.975617		1.6994	0.900903		1.6994	0.866626		1.6994	0.796466		1.6994	0.690025		1.6994	0.589421		1.6994	0.518774		1.6994	0.438141		1.6994	0.364527
1.7014	0.975507		1.7014	0.900473		1.7014	0.866061		1.7014	0.795652		1.7014	0.688938		1.7014	0.58826		1.7014	0.517716		1.7014	0.437392		1.7014	0.364261
1.70341	0.975394		1.70341	0.900035		1.70341	0.865486		1.70341	0.794826		1.70341	0.687835		1.70341	0.587084		1.70341	0.516646		1.70341	0.436637		1.70341	0.363994
1.70541	0.975279		1.70541	0.89959		1.70541	0.864901		1.70541	0.793985		1.70541	0.686716		1.70541	0.585894		1.70541	0.515565		1.70541	0.435876		1.70541	0.363725
1.70741	0.975163		1.70741	0.899137		1.70741	0.864306		1.70741	0.79313		1.70741	0.685579		1.70741	0.584688		1.70741	0.514473		1.70741	0.43511		1.70741	0.363455
1.70942	0.975044		1.70942	0.898676		1.70942	0.8637		1.70942	0.792262		1.70942	0.684426		1.70942	0.583468		1.70942	0.513369		1.70942	0.434337		1.70942	0.363183
1.71142	0.974923		1.71142	0.898207		1.71142	0.863085		1.71142	0.791379		1.71142	0.683256		1.71142	0.582232		1.71142	0.512255		1.71142	0.433559		1.71142	0.362911
1.71343	0.9748		1.71343	0.897729		1.71343	0.862458		1.71343	0.790481		1.71343	0.682068		1.71343	0.580981		1.71343	0.511128		1.71343	0.432775		1.71343	0.362637
1.71543	0.974674		1.71543	0.897244		1.71543	0.861821		1.71543	0.789569		1.71543	0.680863		1.71543	0.579714		1.71543	0.509991		1.71543	0.431986		1.71543	0.362362
1.71743	0.974547		1.71743	0.896749		1.71743	0.861173		1.71743	0.788641		1.71743	0.679639		1.71743	0.578432		1.71743	0.508842		1.71743	0.431191		1.71743	0.362086
1.71944	0.974417		1.71944	0.896247		1.71944	0.860514		1.71944	0.787698		1.71944	0.678398		1.71944	0.577135		1.71944	0.507682		1.71944	0.430391		1.71944	0.361809
1.72144	0.974285		1.72144	0.895735		1.72144	0.859844		1.72144	0.78674		1.72144	0.677138		1.72144	0.575822		1.72144	0.506511		1.72144	0.429586		1.72144	0.361531
1.72345	0.97415		1.72345	0.895214		1.72345	0.859161		1.72345	0.785766		1.72345	0.67586		1.72345	0.574493		1.72345	0.505329		1.72345	0.428775		1.72345	0.361252
1.72545	0.974013		1.72545	0.894685		1.72545	0.858468		1.72545	0.784776		1.72545	0.674564		1.72545	0.573148		1.72545	0.504135		1.72545	0.427959		1.72545	0.360971
1.72745	0.973874		1.72745	0.894146		1.72745	0.857762		1.72745	0.783769		1.72745	0.673248		1.72745	0.571788		1.72745	0.502931		1.72745	0.427138		1.72745	0.36069
1.72946	0.973732		1.72946	0.893597		1.72946	0.857043		1.72946	0.782746		1.72946	0.671913		1.72946	0.570412		1.72946	0.501715		1.72946	0.426312		1.72946	0.360409
1.73146	0.973587		1.73146	0.893039		1.73146	0.856313		1.73146	0.781706		1.73146	0.670559		1.73146	0.569019		1.73146	0.500488		1.73146	0.425482		1.73146	0.360126
1.73347	0.97344		1.73347	0.892471		1.73347	0.85557		1.73347	0.780648		1.73347	0.669185		1.73347	0.567611		1.73347	0.499251		1.73347	0.424646		1.73347	0.359843
1.73547	0.97329		1.73547	0.891892		1.73547	0.854813		1.73547	0.779574		1.73547	0.667791		1.73547	0.566186		1.73547	0.498002		1.73547	0.423806		1.73547	0.359558
1.73747	0.973137		1.73747	0.891304		1.73747	0.854044		1.73747	0.778481		1.73747	0.666376		1.73747	0.564746		1.73747	0.496743		1.73747	0.422961		1.73747	0.359273
1.73948	0.972981		1.73948	0.890705		1.73948	0.853261		1.73948	0.77737		1.73948	0.664942		1.73948	0.563289		1.73948	0.495473		1.73948	0.422112		1.73948	0.358988
1.74148	0.972823		1.74148	0.890095		1.74148	0.852464		1.74148	0.776241		1.74148	0.663487		1.74148	0.561816		1.74148	0.494191		1.74148	0.421258		1.74148	0.358702
1.74349	0.972661		1.74349	0.889474		1.74349	0.851653		1.74349	0.775093		1.74349	0.662011		1.74349	0.560326		1.74349	0.4929		1.74349	0.4204		1.74349	0.358415
1.74549	0.972497		1.74549	0.888842		1.74549	0.850828		1.74549	0.773925		1.74549	0.660513		1.74549	0.55882		1.74549	0.491597		1.74549	0.419538		1.74549	0.358128
1.74749	0.97233		1.74749	0.888199		1.74749	0.849989		1.74749	0.772738		1.74749	0.658995		1.74749	0.557297		1.74749	0.490284		1.74749	0.418672		1.74749	0.35784
1.7495	0.972159		1.7495	0.887544		1.7495	0.849134		1.7495	0.771532		1.7495	0.657454		1.7495	0.555758		1.7495	0.488961		1.7495	0.417801		1.7495	0.357552
1.7515	0.971985		1.7515	0.886877		1.7515	0.848265		1.7515	0.770305		1.7515	0.655891		1.7515	0.554203		1.7515	0.487627		1.7515	0.416927		1.7515	0.357264
1.75351	0.971808		1.75351	0.886198		1.75351	0.847379		1.75351	0.769057		1.75351	0.654307		1.75351	0.55263		1.75351	0.486282		1.75351	0.416049		1.75351	0.356975
1.75551	0.971627		1.75551	0.885507		1.75551	0.846478		1.75551	0.767789		1.75551	0.652699		1.75551	0.551041		1.75551	0.484928		1.75551	0.415168		1.75551	0.356686
1.75752	0.971443		1.75752	0.884803		1.75752	0.845561		1.75752	0.766499		1.75752	0.651069		1.75752	0.549436		1.75752	0.483563		1.75752	0.414283		1.75752	0.356396
1.75952	0.971256		1.75952	0.884085		1.75952	0.844627		1.75952	0.765187		1.75952	0.649416		1.75952	0.547813		1.75952	0.482188		1.75952	0.413394		1.75952	0.356107
1.76152	0.971065		1.76152	0.883355		1.76152	0.843677		1.76152	0.763853		1.76152	0.647739		1.76152	0.546174		1.76152	0.480803		1.76152	0.412503		1.76152	0.355817
1.76353	0.97087		1.76353	0.882611		1.76353	0.842709		1.76353	0.762497		1.76353	0.646038		1.76353	0.544518		1.76353	0.479408		1.76353	0.411608		1.76353	0.355527
1.76553	0.970671		1.76553	0.881853		1.76553	0.841723		1.76553	0.761117		1.76553	0.644314		1.76553	0.542845		1.76553	0.478004		1.76553	0.41071		1.76553	0.355237
1.76754	0.970469		1.76754	0.881081		1.76754	0.840719		1.76754	0.759714		1.76754	0.642565		1.76754	0.541156		1.76754	0.476589		1.76754	0.409809		1.76754	0.354947
1.76954	0.970262		1.76954	0.880294		1.76954	0.839697		1.76954	0.758286		1.76954	0.640791		1.76954	0.539449		1.76954	0.475166		1.76954	0.408905		1.76954	0.354658
1.77154	0.970052		1.77154	0.879492		1.77154	0.838656		1.77154	0.756835		1.77154	0.638993		1.77154	0.537726		1.77154	0.473732		1.77154	0.407999		1.77154	0.354368
1.77355	0.969837		1.77355	0.878675		1.77355	0.837596		1.77355	0.755358		1.77355	0.63717		1.77355	0.535986		1.77355	0.47229		1.77355	0.40709		1.77355	0.354078
1.77555	0.969618		1.77555	0.877843		1.77555	0.836516		1.77555	0.753856		1.77555	0.635321		1.77555	0.534229		1.77555	0.470838		1.77555	0.406179		1.77555	0.353789
1.77756	0.969395		1.77756	0.876994		1.77756	0.835416		1.77756	0.752327		1.77756	0.633446		1.77756	0.532456		1.77756	0.469378		1.77756	0.405265		1.77756	0.353499
1.77956	0.969167		1.77956	0.876129		1.77956	0.834295		1.77956	0.750772		1.77956	0.631545		1.77956	0.530665		1.77956	0.467908		1.77956	0.40435		1.77956	0.35321
1.78156	0.968934		1.78156	0.875248		1.78156	0.833153		1.78156	0.74919		1.78156	0.629617		1.78156	0.528858		1.78156	0.46643		1.78156	0.403432		1.78156	0.352921
1.78357	0.968697		1.78357	0.874349		1.78357	0.831989		1.78357	0.747581		1.78357	0.627663		1.78357	0.527035		1.78357	0.464943		1.78357	0.402513		1.78357	0.352633
1.78557	0.968454		1.78557	0.873432		1.78557	0.830803		1.78557	0.745943		1.78557	0.625682		1.78557	0.525194		1.78557	0.463448		1.78557	0.401592		1.78557	0.352345
1.78758	0.968207		1.78758	0.872498		1.78758	0.829595		1.78758	0.744276		1.78758	0.623673		1.78758	0.523337		1.78758	0.461945		1.78758	0.400669		1.78758	0.352058
1.78958	0.967955		1.78958	0.871544		1.78958	0.828363		1.78958	0.74258		1.78958	0.621637		1.78958	0.521464		1.78958	0.460434		1.78958	0.399745		1.78958	0.351771
1.79158	0.967697		1.79158	0.870572		1.79158	0.827107		1.79158	0.740854		1.79158	0.619573		1.79158	0.519574		1.79158	0.458914		1.79158	0.39882		1.79158	0.351484
1.79359	0.967434		1.79359	0.86958		1.79359	0.825827		1.79359	0.739097		1.79359	0.61748		1.79359	0.517667		1.79359	0.457388		1.79359	0.397894		1.79359	0.351198
1.79559	0.967165		1.79559	0.868568		1.79559	0.824521		1.79559	0.737309		1.79559	0.615359		1.79559	0.515745		1.79559	0.455853		1.79559	0.396967		1.79559	0.350913
1.7976	0.96689		1.7976	0.867536		1.7976	0.82319		1.7976	0.735488		1.7976	0.613209		1.7976	0.513806		1.7976	0.454312		1.7976	0.396039		1.7976	0.350629
1.7996	0.96661		1.7996	0.866482		1.7996	0.821833		1.7996	0.733635		1.7996	0.61103		1.7996	0.511851		1.7996	0.452764		1.7996	0.395111		1.7996	0.350345
1.8016	0.966323		1.8016	0.865406		1.8016	0.820448		1.8016	0.731749		1.8016	0.608821		1.8016	0.50988		1.8016	0.451208		1.8016	0.394182		1.8016	0.350062
1.80361	0.96603		1.80361	0.864309		1.80361	0.819036		1.80361	0.729828		1.80361	0.606582		1.80361	0.507894		1.80361	0.449647		1.80361	0.393254		1.80361	0.34978
1.80561	0.965731		1.80561	0.863188		1.80561	0.817595		1.80561	0.727873		1.80561	0.604314		1.80561	0.505891		1.80561	0.448078		1.80561	0.392325		1.80561	0.349499
1.80762	0.965424		1.80762	0.862043		1.80762	0.816125		1.80762	0.725882		1.80762	0.602014		1.80762	0.503874		1.80762	0.446504		1.80762	0.391396		1.80762	0.349218
1.80962	0.965111		1.80962	0.860875		1.80962	0.814625		1.80962	0.723854		1.80962	0.599685		1.80962	0.501841		1.80962	0.444924		1.80962	0.390467		1.80962	0.348939
1.81162	0.964791		1.81162	0.859681		1.81162	0.813094		1.81162	0.721789		1.81162	0.597324		1.81162	0.499792		1.81162	0.443339		1.81162	0.389539		1.81162	0.348661
1.81363	0.964464		1.81363	0.858462		1.81363	0.811531		1.81363	0.719686		1.81363	0.594932		1.81363	0.497729		1.81363	0.441748		1.81363	0.388612		1.81363	0.348384
1.81563	0.964129		1.81563	0.857216		1.81563	0.809936		1.81563	0.717544		1.81563	0.592509		1.81563	0.495651		1.81563	0.440152		1.81563	0.387685		1.81563	0.348108
1.81764	0.963786		1.81764	0.855943		1.81764	0.808307		1.81764	0.715362		1.81764	0.590054		1.81764	0.493559		1.81764	0.438552		1.81764	0.38676		1.81764	0.347833
1.81964	0.963435		1.81964	0.854643		1.81964	0.806644		1.81964	0.713139		1.81964	0.587567		1.81964	0.491453		1.81964	0.436947		1.81964	0.385836		1.81964	0.347559
1.82164	0.963076		1.82164	0.853313		1.82164	0.804945		1.82164	0.710874		1.82164	0.585048		1.82164	0.489332		1.82164	0.435338		1.82164	0.384913		1.82164	0.347287
1.82365	0.962708		1.82365	0.851953		1.82365	0.803211		1.82365	0.708567		1.82365	0.582496		1.82365	0.487198		1.82365	0.433725		1.82365	0.383992		1.82365	0.347016
1.82565	0.962332		1.82565	0.850563		1.82565	0.801438		1.82565	0.706217		1.82565	0.579912		1.82565	0.48505		1.82565	0.432109		1.82565	0.383072		1.82565	0.346746
1.82766	0.961946		1.82766	0.849141		1.82766	0.799627		1.82766	0.703822		1.82766	0.577295		1.82766	0.48289		1.82766	0.43049		1.82766	0.382155		1.82766	0.346478
1.82966	0.96155		1.82966	0.847687		1.82966	0.797777		1.82966	0.701381		1.82966	0.574645		1.82966	0.480716		1.82966	0.428868		1.82966	0.381239		1.82966	0.346211
1.83166	0.961145		1.83166	0.846199		1.83166	0.795885		1.83166	0.698893		1.83166	0.571962		1.83166	0.47853		1.83166	0.427243		1.83166	0.380326		1.83166	0.345946
1.83367	0.96073		1.83367	0.844676		1.83367	0.793952		1.83367	0.696358		1.83367	0.569246		1.83367	0.476332		1.83367	0.425617		1.83367	0.379416		1.83367	0.345682
1.83567	0.960304		1.83567	0.843118		1.83567	0.791975		1.83567	0.693774		1.83567	0.566496		1.83567	0.474123		1.83567	0.423988		1.83567	0.378508		1.83567	0.34542
1.83768	0.959868		1.83768	0.841522		1.83768	0.789953		1.83768	0.69114		1.83768	0.563713		1.83768	0.471902		1.83768	0.422359		1.83768	0.377604		1.83768	0.34516
1.83968	0.95942		1.83968	0.839889		1.83968	0.787886		1.83968	0.688455		1.83968	0.560897		1.83968	0.46967		1.83968	0.420728		1.83968	0.376702		1.83968	0.344901
1.84168	0.95896		1.84168	0.838215		1.84168	0.785771		1.84168	0.685718		1.84168	0.558047		1.84168	0.467428		1.84168	0.419097		1.84168	0.375804		1.84168	0.344644
1.84369	0.958488		1.84369	0.836501		1.84369	0.783607		1.84369	0.682927		1.84369	0.555163		1.84369	0.465176		1.84369	0.417466		1.84369	0.37491		1.84369	0.344389
1.84569	0.958003		1.84569	0.834745		1.84569	0.781392		1.84569	0.680082		1.84569	0.552246		1.84569	0.462914		1.84569	0.415835		1.84569	0.374019		1.84569	0.344136
1.8477	0.957506		1.8477	0.832945		1.8477	0.779126		1.8477	0.677181		1.8477	0.549295		1.8477	0.460644		1.8477	0.414205		1.8477	0.373133		1.8477	0.343885
1.8497	0.956994		1.8497	0.8311		1.8497	0.776806		1.8497	0.674222		1.8497	0.54631		1.8497	0.458365		1.8497	0.412576		1.8497	0.37225		1.8497	0.343635
1.8517	0.956469		1.8517	0.829208		1.8517	0.77443		1.8517	0.671205		1.8517	0.543293		1.8517	0.456078		1.8517	0.410949		1.8517	0.371372		1.8517	0.343388
1.85371	0.955929		1.85371	0.827267		1.85371	0.771997		1.85371	0.668129		1.85371	0.540242		1.85371	0.453784		1.85371	0.409324		1.85371	0.370499		1.85371	0.343142
1.85571	0.955374		1.85571	0.825277		1.85571	0.769505		1.85571	0.664991		1.85571	0.537158		1.85571	0.451484		1.85571	0.407701		1.85571	0.369631		1.85571	0.342899
1.85772	0.954802		1.85772	0.823234		1.85772	0.766952		1.85772	0.661791		1.85772	0.534041		1.85772	0.449177		1.85772	0.406081		1.85772	0.368767		1.85772	0.342658
1.85972	0.954214		1.85972	0.821137		1.85972	0.764335		1.85972	0.658527		1.85972	0.530892		1.85972	0.446865		1.85972	0.404465		1.85972	0.367909		1.85972	0.342419
1.86172	0.953609		1.86172	0.818985		1.86172	0.761653		1.86172	0.655198		1.86172	0.52771		1.86172	0.444548		1.86172	0.402853		1.86172	0.367057		1.86172	0.342182
1.86373	0.952986		1.86373	0.816774		1.86373	0.758904		1.86373	0.651802		1.86373	0.524497		1.86373	0.442228		1.86373	0.401245		1.86373	0.36621		1.86373	0.341948
1.86573	0.952343		1.86573	0.814503		1.86573	0.756085		1.86573	0.648339		1.86573	0.521253		1.86573	0.439904		1.86573	0.399642		1.86573	0.36537		1.86573	0.341716
1.86774	0.951682		1.86774	0.812169		1.86774	0.753193		1.86774	0.644806		1.86774	0.517977		1.86774	0.437577		1.86774	0.398044		1.86774	0.364535		1.86774	0.341486
1.86974	0.950999		1.86974	0.80977		1.86974	0.750227		1.86974	0.641202		1.86974	0.514672		1.86974	0.435249		1.86974	0.396453		1.86974	0.363707		1.86974	0.341259
1.87174	0.950295		1.87174	0.807303		1.87174	0.747183		1.87174	0.637526		1.87174	0.511336		1.87174	0.43292		1.87174	0.394868		1.87174	0.362886		1.87174	0.341034
1.87375	0.949569		1.87375	0.804766		1.87375	0.744059		1.87375	0.633776		1.87375	0.507972		1.87375	0.430591		1.87375	0.39329		1.87375	0.362071		1.87375	0.340811
1.87575	0.948819		1.87575	0.802155		1.87575	0.740852		1.87575	0.629951		1.87575	0.504579		1.87575	0.428262		1.87575	0.39172		1.87575	0.361264		1.87575	0.340591
1.87776	0.948045		1.87776	0.799468		1.87776	0.73756		1.87776	0.62605		1.87776	0.501159		1.87776	0.425936		1.87776	0.390158		1.87776	0.360463		1.87776	0.340374
1.87976	0.947244		1.87976	0.796702		1.87976	0.734177		1.87976	0.622071		1.87976	0.497712		1.87976	0.423611		1.87976	0.388604		1.87976	0.359671		1.87976	0.340159
1.88176	0.946417		1.88176	0.793853		1.88176	0.730703		1.88176	0.618014		1.88176	0.49424		1.88176	0.421291		1.88176	0.38706		1.88176	0.358886		1.88176	0.339947
1.88377	0.945561		1.88377	0.790918		1.88377	0.727133		1.88377	0.613875		1.88377	0.490743		1.88377	0.418974		1.88377	0.385526		1.88377	0.358109		1.88377	0.339738
1.88577	0.944675		1.88577	0.787892		1.88577	0.723464		1.88577	0.609655		1.88577	0.487223		1.88577	0.416664		1.88577	0.384002		1.88577	0.35734		1.88577	0.339531
1.88778	0.943758		1.88778	0.784773		1.88778	0.719691		1.88778	0.605352		1.88778	0.483681		1.88778	0.414359		1.88778	0.38249		1.88778	0.356579		1.88778	0.339327
1.88978	0.942807		1.88978	0.781555		1.88978	0.715812		1.88978	0.600965		1.88978	0.480118		1.88978	0.412062		1.88978	0.380989		1.88978	0.355828		1.88978	0.339126
1.89178	0.941822		1.89178	0.778235		1.89178	0.711823		1.89178	0.596493		1.89178	0.476535		1.89178	0.409774		1.89178	0.3795		1.89178	0.355085		1.89178	0.338928
1.89379	0.940799		1.89379	0.774807		1.89379	0.707719		1.89379	0.591935		1.89379	0.472935		1.89379	0.407496		1.89379	0.378024		1.89379	0.354351		1.89379	0.338732
1.89579	0.939738		1.89579	0.771268		1.89579	0.703495		1.89579	0.58729		1.89579	0.469318		1.89579	0.405228		1.89579	0.376561		1.89579	0.353626		1.89579	0.33854
1.8978	0.938636		1.8978	0.767611		1.8978	0.699148		1.8978	0.582558		1.8978	0.465687		1.8978	0.402972		1.8978	0.375112		1.8978	0.352911		1.8978	0.338351
1.8998	0.93749		1.8998	0.763832		1.8998	0.694674		1.8998	0.577737		1.8998	0.462043		1.8998	0.400729		1.8998	0.373678		1.8998	0.352206		1.8998	0.338164
1.9018	0.936298		1.9018	0.759924		1.9018	0.690066		1.9018	0.572827		1.9018	0.458389		1.9018	0.398501		1.9018	0.372259		1.9018	0.351511		1.9018	0.337981
1.90381	0.935058		1.90381	0.755881		1.90381	0.68532		1.90381	0.567829		1.90381	0.454726		1.90381	0.396288		1.90381	0.370857		1.90381	0.350825		1.90381	0.337801
1.90581	0.933765		1.90581	0.751697		1.90581	0.680432		1.90581	0.562742		1.90581	0.451056		1.90581	0.394092		1.90581	0.36947		1.90581	0.35015		1.90581	0.337623
1.90782	0.932418		1.90782	0.747365		1.90782	0.675396		1.90782	0.557566		1.90782	0.447383		1.90782	0.391914		1.90782	0.368101		1.90782	0.349486		1.90782	0.337449
1.90982	0.931012		1.90982	0.742878		1.90982	0.670206		1.90982	0.552301		1.90982	0.443707		1.90982	0.389755		1.90982	0.366749		1.90982	0.348832		1.90982	0.337279
1.91182	0.929544		1.91182	0.738227		1.91182	0.664858		1.91182	0.546949		1.91182	0.440033		1.91182	0.387616		1.91182	0.365416		1.91182	0.34819		1.91182	0.337111
1.91383	0.928009		1.91383	0.733406		1.91383	0.659345		1.91383	0.54151		1.91383	0.436361		1.91383	0.385499		1.91383	0.364102		1.91383	0.347558		1.91383	0.336947
1.91583	0.926403		1.91583	0.728404		1.91583	0.653662		1.91583	0.535986		1.91583	0.432697		1.91583	0.383406		1.91583	0.362807		1.91583	0.346938		1.91583	0.336786
1.91784	0.924721		1.91784	0.723213		1.91784	0.647804		1.91784	0.530378		1.91784	0.429041		1.91784	0.381337		1.91784	0.361533		1.91784	0.34633		1.91784	0.336628
1.91984	0.922957		1.91984	0.717824		1.91984	0.641764		1.91984	0.524689		1.91984	0.425397		1.91984	0.379293		1.91984	0.360279		1.91984	0.345733		1.91984	0.336474
1.92184	0.921106		1.92184	0.712225		1.92184	0.635536		1.92184	0.518921		1.92184	0.421769		1.92184	0.377277		1.92184	0.359047		1.92184	0.345148		1.92184	0.336323
1.92385	0.919161		1.92385	0.706407		1.92385	0.629116		1.92385	0.513077		1.92385	0.418159		1.92385	0.375289		1.92385	0.357837		1.92385	0.344576		1.92385	0.336175
1.92585	0.917114		1.92585	0.700358		1.92585	0.622497		1.92585	0.50716		1.92585	0.414572		1.92585	0.373332		1.92585	0.356649		1.92585	0.344016		1.92585	0.336031
1.92786	0.914958		1.92786	0.694066		1.92786	0.615675		1.92786	0.501176		1.92786	0.41101		1.92786	0.371405		1.92786	0.355485		1.92786	0.343468		1.92786	0.335891
1.92986	0.912684		1.92986	0.687518		1.92986	0.608644		1.92986	0.495128		1.92986	0.407476		1.92986	0.369511		1.92986	0.354345		1.92986	0.342933		1.92986	0.335753
1.93186	0.910282		1.93186	0.680702		1.93186	0.601401		1.93186	0.489022		1.93186	0.403976		1.93186	0.367651		1.93186	0.353229		1.93186	0.342411		1.93186	0.33562
1.93387	0.90774		1.93387	0.673604		1.93387	0.593939		1.93387	0.482864		1.93387	0.400512		1.93387	0.365826		1.93387	0.352138		1.93387	0.341902		1.93387	0.33549
1.93587	0.905047		1.93587	0.66621		1.93587	0.586258		1.93587	0.47666		1.93587	0.397089		1.93587	0.364038		1.93587	0.351073		1.93587	0.341406		1.93587	0.335363
1.93788	0.902189		1.93788	0.658506		1.93788	0.578353		1.93788	0.470419		1.93788	0.39371		1.93788	0.362288		1.93788	0.350034		1.93788	0.340924		1.93788	0.335241
1.93988	0.89915		1.93988	0.650476		1.93988	0.570225		1.93988	0.464149		1.93988	0.39038		1.93988	0.360577		1.93988	0.349021		1.93988	0.340455		1.93988	0.335121
1.94188	0.895913		1.94188	0.642107		1.94188	0.561871		1.94188	0.457858		1.94188	0.387103		1.94188	0.358907		1.94188	0.348036		1.94188	0.34		1.94188	0.335006
1.94389	0.892459		1.94389	0.633383		1.94389	0.553294		1.94389	0.451557		1.94389	0.383882		1.94389	0.357279		1.94389	0.347079		1.94389	0.339559		1.94389	0.334894
1.94589	0.888763		1.94589	0.62429		1.94589	0.544498		1.94589	0.445257		1.94589	0.380723		1.94589	0.355695		1.94589	0.34615		1.94589	0.339132		1.94589	0.334786
1.9479	0.884802		1.9479	0.614815		1.9479	0.535486		1.9479	0.438969		1.9479	0.377629		1.9479	0.354155		1.9479	0.34525		1.9479	0.338719		1.9479	0.334682
1.9499	0.880545		1.9499	0.604944		1.9499	0.526267		1.9499	0.432706		1.9499	0.374605		1.9499	0.352662		1.9499	0.34438		1.9499	0.33832		1.9499	0.334581
1.9519	0.875958		1.9519	0.594666		1.9519	0.516852		1.9519	0.426481		1.9519	0.371656		1.9519	0.351215		1.9519	0.343539		1.9519	0.337936		1.9519	0.334484
1.95391	0.871003		1.95391	0.583974		1.95391	0.507253		1.95391	0.42031		1.95391	0.368784		1.95391	0.349817		1.95391	0.342729		1.95391	0.337566		1.95391	0.334391
1.95591	0.865632		1.95591	0.57286		1.95591	0.497488		1.95591	0.414207		1.95591	0.365996		1.95591	0.348469		1.95591	0.341949		1.95591	0.337211		1.95591	0.334302
1.95792	0.859794		1.95792	0.561324		1.95792	0.487579		1.95792	0.408189		1.95792	0.363295		1.95792	0.347172		1.95792	0.341201		1.95792	0.336872		1.95792	0.334217
1.95992	0.853424		1.95992	0.54937		1.95992	0.47755		1.95992	0.402271		1.95992	0.360686		1.95992	0.345927		1.95992	0.340485		1.95992	0.336547		1.95992	0.334135
1.96192	0.846448		1.96192	0.537007		1.96192	0.467433		1.96192	0.396473		1.96192	0.358172		1.96192	0.344734		1.96192	0.3398		1.96192	0.336237		1.96192	0.334057
1.96393	0.838777		1.96393	0.524254		1.96393	0.457262		1.96393	0.390812		1.96393	0.355758		1.96393	0.343596		1.96393	0.339149		1.96393	0.335942		1.96393	0.333984
1.96593	0.830303		1.96593	0.511139		1.96593	0.44708		1.96593	0.385307		1.96593	0.353449		1.96593	0.342514		1.96593	0.33853		1.96593	0.335663		1.96593	0.333914
1.96794	0.820895		1.96794	0.497701		1.96794	0.436932		1.96794	0.379977		1.96794	0.351247		1.96794	0.341487		1.96794	0.337944		1.96794	0.335399		1.96794	0.333848
1.96994	0.810395		1.96994	0.483996		1.96994	0.42687		1.96994	0.374841		1.96994	0.349157		1.96994	0.340518		1.96994	0.337392		1.96994	0.33515		1.96994	0.333786
1.97194	0.798607		1.97194	0.470091		1.97194	0.416954		1.97194	0.36992		1.97194	0.347183		1.97194	0.339607		1.97194	0.336874		1.97194	0.334918		1.97194	0.333728
1.97395	0.785287		1.97395	0.456074		1.97395	0.407247		1.97395	0.365232		1.97395	0.345328		1.97395	0.338754		1.97395	0.336391		1.97395	0.3347		1.97395	0.333673
1.97595	0.770127		1.97595	0.442052		1.97595	0.397818		1.97595	0.360798		1.97595	0.343596		1.97595	0.337962		1.97595	0.335942		1.97595	0.334499		1.97595	0.333623
1.97796	0.752742		1.97796	0.428149		1.97796	0.388738		1.97796	0.356636		1.97796	0.34199		1.97796	0.33723		1.97796	0.335528		1.97796	0.334314		1.97796	0.333577
1.97996	0.732639		1.97996	0.414513		1.97996	0.380086		1.97996	0.352764		1.97996	0.340513		1.97996	0.336559		1.97996	0.335149		1.97996	0.334144		1.97996	0.333535
1.98196	0.709193		1.98196	0.401311		1.98196	0.37194		1.98196	0.349201		1.98196	0.339167		1.98196	0.33595		1.98196	0.334806		1.98196	0.33399		1.98196	0.333497
1.98397	0.681614		1.98397	0.388723		1.98397	0.364378		1.98397	0.345963		1.98397	0.337956		1.98397	0.335404		1.98397	0.334498		1.98397	0.333853		1.98397	0.333462
1.98597	0.648941		1.98597	0.376949		1.98597	0.357481		1.98597	0.343067		1.98597	0.336881		1.98597	0.334921		1.98597	0.334225		1.98597	0.333731		1.98597	0.333432
1.98798	0.610091		1.98798	0.36619		1.98798	0.351323		1.98798	0.340525		1.98798	0.335946		1.98798	0.334501		1.98798	0.333989		1.98798	0.333626		1.98798	0.333406
1.98998	0.564097		1.98998	0.356652		1.98998	0.345976		1.98998	0.338352		1.98998	0.335151		1.98998	0.334145		1.98998	0.333789		1.98998	0.333536		1.98998	0.333384
1.99198	0.510771		1.99198	0.348531		1.99198	0.341505		1.99198	0.336558		1.99198	0.334498		1.99198	0.333853		1.99198	0.333625		1.99198	0.333463		1.99198	0.333366
1.99399	0.452133		1.99399	0.342006		1.99399	0.337966		1.99399	0.335153		1.99399	0.333989		1.99399	0.333626		1.99399	0.333498		1.99399	0.333406		1.99399	0.333351
1.99599	0.39461		1.99599	0.337228		1.99599	0.335404		1.99599	0.334144		1.99599	0.333625		1.99599	0.333463		1.99599	0.333406		1.99599	0.333366		1.99599	0.333341
1.998	0.35031		1.998	0.334313		1.998	0.333853		1.998	0.333536		1.998	0.333406		1.998	0.333366		1.998	0.333352		1.998	0.333341		1.998	0.333335
2	0.333333		2	0.333333		2	0.333333		2	0.333333		2	0.333333		2	0.333333		2	0.333333		2	0.333333		2	0.333333
