# Supplementary material for: Characterization of fine particles using optomagnetic measurements
Source: Royal Society of Chemistry journal article supplement (doi:10.1039/c6cp08749c), 2017-01-01
Supplement: c6cp08749c2.zip [file fig3.xls]

## Sheet: 3b
	xi'',sigma=2.00			xi'',sigma=1.40			xi'',sigma=1.00			xi'',sigma=0.70			xi'',sigma=0.50			xi'',sigma=0.30			xi'',sigma=0.05
1	0.044991		1	0.0251535		1	0.0164075		1	0.0127672		1	0.0113284		1	0.0104588		1	0.0100115
1.12332	0.0488376		1.12332	0.0280107		1.12332	0.0184096		1.12332	0.014339		1.12332	0.0127246		1.12332	0.0117482		1.12332	0.0112459
1.26186	0.0529246		1.26186	0.0311589		1.26186	0.0206509		1.26186	0.0161037		1.26186	0.0142925		1.26186	0.0131964		1.26186	0.0126323
1.41747	0.0572562		1.41747	0.0346206		1.41747	0.0231578		1.41747	0.0180844		1.41747	0.0160533		1.41747	0.0148229		1.41747	0.0141896
1.59228	0.0618349		1.59228	0.0384183		1.59228	0.0259596		1.59228	0.0203072		1.59228	0.0180305		1.59228	0.0166497		1.59228	0.0159387
1.78865	0.0666619		1.78865	0.0425745		1.78865	0.0290878		1.78865	0.022801		1.78865	0.0202505		1.78865	0.0187012		1.78865	0.0179031
2.00923	0.0717365		2.00923	0.0471112		2.00923	0.0325762		2.00923	0.0255982		2.00923	0.0227427		2.00923	0.021005		2.00923	0.0201093
2.25702	0.0770564		2.25702	0.0520498		2.25702	0.0364611		2.25702	0.0287342		2.25702	0.0255401		2.25702	0.0235918		2.25702	0.0225868
2.53536	0.0826171		2.53536	0.05741		2.53536	0.0407808		2.53536	0.0322487		2.53536	0.0286795		2.53536	0.0264962		2.53536	0.0253689
2.84804	0.0884121		2.84804	0.0632096		2.84804	0.0455753		2.84804	0.0361848		2.84804	0.0322017		2.84804	0.0297567		2.84804	0.0284926
3.19927	0.0944325		3.19927	0.0694641		3.19927	0.0508859		3.19927	0.04059		3.19927	0.0361523		3.19927	0.0334162		3.19927	0.0319996
3.59381	0.100667		3.59381	0.0761857		3.59381	0.0567547		3.59381	0.0455159		3.59381	0.0405816		3.59381	0.0375229		3.59381	0.0359362
4.03702	0.107103		4.03702	0.0833828		4.03702	0.0632235		4.03702	0.051018		4.03702	0.0455451		4.03702	0.04213		4.03702	0.0403542
4.53488	0.113723		4.53488	0.0910593		4.53488	0.0703328		4.53488	0.0571559		4.53488	0.0511038		4.53488	0.0472968		4.53488	0.0453114
5.09414	0.120508		5.09414	0.0992138		5.09414	0.0781209		5.09414	0.0639921		5.09414	0.0573244		5.09414	0.0530889		5.09414	0.0508718
5.72237	0.127439		5.72237	0.107839		5.72237	0.0866219		5.72237	0.0715918		5.72237	0.0642789		5.72237	0.0595785		5.72237	0.0571064
6.42807	0.134491		6.42807	0.116921		6.42807	0.0958644		6.42807	0.0800213		6.42807	0.0720447		6.42807	0.0668445		6.42807	0.0640936
7.22081	0.141637		7.22081	0.126439		7.22081	0.10587		7.22081	0.0893464		7.22081	0.0807037		7.22081	0.0749731		7.22081	0.0719197
8.11131	0.14885		8.11131	0.136365		8.11131	0.116649		8.11131	0.0996301		8.11131	0.090341		8.11131	0.084057		8.11131	0.0806784
9.11163	0.156099		9.11163	0.146661		9.11163	0.128202		9.11163	0.110929		9.11163	0.101043		9.11163	0.0941949		9.11163	0.0904716
10.2353	0.163351		10.2353	0.157282		10.2353	0.140514		10.2353	0.123292		10.2353	0.112896		10.2353	0.10549		10.2353	0.101408
11.4976	0.170571		11.4976	0.168175		11.4976	0.153556		11.4976	0.136752		11.4976	0.125979		11.4976	0.118049		11.4976	0.113603
12.9155	0.177725		12.9155	0.179278		12.9155	0.167278		12.9155	0.151325		12.9155	0.140364		12.9155	0.131975		12.9155	0.127174
14.5083	0.184773		14.5083	0.190522		14.5083	0.181613		14.5083	0.167003		14.5083	0.156102		14.5083	0.147369		14.5083	0.142241
16.2975	0.191679		16.2975	0.201827		16.2975	0.196471		16.2975	0.183746		16.2975	0.173223		16.2975	0.164315		16.2975	0.158917
18.3074	0.198403		18.3074	0.21311		18.3074	0.211741		18.3074	0.201482		18.3074	0.191723		18.3074	0.182879		18.3074	0.177303
20.5651	0.204905		20.5651	0.224279		20.5651	0.227292		20.5651	0.220095		20.5651	0.211551		20.5651	0.203089		20.5651	0.197476
23.1013	0.211148		23.1013	0.235239		23.1013	0.242969		23.1013	0.239428		23.1013	0.232605		23.1013	0.224925		23.1013	0.219477
25.9502	0.217091		25.9502	0.245891		25.9502	0.258599		25.9502	0.259275		25.9502	0.254713		25.9502	0.248301		25.9502	0.243289
29.1505	0.222698		29.1505	0.256132		29.1505	0.273993		29.1505	0.279381		29.1505	0.277631		29.1505	0.273044		29.1505	0.268816
32.7455	0.227932		32.7455	0.265861		32.7455	0.288948		32.7455	0.299447		32.7455	0.301034		32.7455	0.298876		32.7455	0.295854
36.7838	0.232759		36.7838	0.274977		36.7838	0.303252		36.7838	0.319134		36.7838	0.324515		36.7838	0.325396		36.7838	0.324063
41.3201	0.237146		41.3201	0.283381		41.3201	0.316689		41.3201	0.338069		41.3201	0.347593		41.3201	0.352074		41.3201	0.352942
46.4159	0.241062		46.4159	0.290981		46.4159	0.329046		46.4159	0.35586		46.4159	0.369719		46.4159	0.378245		46.4159	0.381804
52.1401	0.244481		52.1401	0.297689		52.1401	0.340116		52.1401	0.372106		52.1401	0.390303		52.1401	0.403133		52.1401	0.409775
58.5702	0.247378		58.5702	0.303429		58.5702	0.349707		58.5702	0.386418		58.5702	0.408737		58.5702	0.425877		58.5702	0.435815
65.7933	0.249734		65.7933	0.308131		65.7933	0.357648		65.7933	0.398433		65.7933	0.424432		65.7933	0.445589		65.7933	0.458776
73.9072	0.25153		73.9072	0.31174		73.9072	0.363792		73.9072	0.407833		73.9072	0.43685		73.9072	0.461417		73.9072	0.47749
83.0218	0.252755		83.0218	0.314211		83.0218	0.368024		83.0218	0.414361		83.0218	0.445546		83.0218	0.472625		83.0218	0.490897
93.2603	0.253399		93.2603	0.315514		93.2603	0.370264		93.2603	0.417833		93.2603	0.450195		93.2603	0.47866		93.2603	0.49817
104.762	0.253458		104.762	0.315632		104.762	0.370468		104.762	0.41815		104.762	0.450621		104.762	0.479214		104.762	0.49884
117.681	0.252931		117.681	0.314566		117.681	0.368633		117.681	0.415304		117.681	0.446807		117.681	0.47426		117.681	0.492863
132.194	0.251821		132.194	0.312326		132.194	0.364794		132.194	0.409375		132.194	0.438899		132.194	0.46405		132.194	0.480627
148.497	0.250138		148.497	0.308942		148.497	0.359024		148.497	0.400531		148.497	0.427193		148.497	0.449091		148.497	0.462895
166.81	0.247893		166.81	0.304454		166.81	0.351432		166.81	0.389016		166.81	0.412113		166.81	0.43009		166.81	0.440691
187.382	0.245103		187.382	0.298917		187.382	0.342158		187.382	0.375135		187.382	0.394181		187.382	0.407881		187.382	0.415173
210.49	0.241786		210.49	0.292396		210.49	0.331369		210.49	0.359245		210.49	0.373979		210.49	0.383352		210.49	0.387501
236.449	0.237967		236.449	0.284968		236.449	0.319254		236.449	0.341732		236.449	0.352113		236.449	0.357372		236.449	0.358741
265.609	0.233673		265.609	0.276718		265.609	0.306016		265.609	0.322994		265.609	0.32918		265.609	0.330739		265.609	0.329805
298.365	0.228931		298.365	0.267737		298.365	0.291868		298.365	0.303427		298.365	0.305738		298.365	0.30414		298.365	0.301415
335.16	0.223776		335.16	0.258122		335.16	0.277026		335.16	0.283408		335.16	0.282284		335.16	0.278135		335.16	0.274111
376.494	0.218241		376.494	0.247975		376.494	0.261703		376.494	0.263284		376.494	0.259241		376.494	0.253148		376.494	0.248262
422.924	0.212362		422.924	0.237398		422.924	0.246104		422.924	0.243364		422.924	0.236949		422.924	0.229482		422.924	0.224097
475.081	0.206176		475.081	0.226491		475.081	0.230423		475.081	0.22391		475.081	0.215669		475.081	0.207328		475.081	0.20173
533.67	0.199722		533.67	0.215356		533.67	0.214834		533.67	0.205139		533.67	0.195585		533.67	0.186789		533.67	0.181192
599.484	0.19304		599.484	0.204088		599.484	0.199496		599.484	0.187217		599.484	0.176814		599.484	0.167897		599.484	0.162454
673.415	0.186167		673.415	0.19278		673.415	0.184546		673.415	0.170268		673.415	0.159415		673.415	0.150631		673.415	0.145444
756.463	0.179144		756.463	0.181518		756.463	0.170098		756.463	0.154373		756.463	0.143402		756.463	0.134934		756.463	0.130064
849.753	0.172009		849.753	0.170381		849.753	0.156248		849.753	0.139578		849.753	0.12875		849.753	0.120721		849.753	0.116203
954.548	0.164799		954.548	0.159441		954.548	0.143065		954.548	0.125896		954.548	0.115412		954.548	0.107897		954.548	0.103743
1072.27	0.15755		1072.27	0.14876		1072.27	0.130604		1072.27	0.113316		1072.27	0.103319		1072.27	0.096358		1072.27	0.0925639
1204.5	0.150298		1204.5	0.138396		1204.5	0.118898		1204.5	0.101807		1204.5	0.0923935		1204.5	0.0859971		1204.5	0.082551
1353.05	0.143075		1353.05	0.128393		1353.05	0.107963		1353.05	0.0913246		1353.05	0.0825501		1353.05	0.0767104		1353.05	0.0735937
1519.91	0.135913		1519.91	0.118791		1519.91	0.097804		1519.91	0.0818127		1519.91	0.0737024		1519.91	0.0683984		1519.91	0.0655889
1707.35	0.12884		1707.35	0.10962		1707.35	0.0884103		1707.35	0.0732092		1707.35	0.0657646		1707.35	0.0609669		1707.35	0.058441
1917.91	0.121884		1917.91	0.100902		1917.91	0.079763		1917.91	0.0654489		1917.91	0.0586542		1917.91	0.0543287		1917.91	0.0520624
2154.43	0.115067		2154.43	0.0926521		2154.43	0.071835		2154.43	0.0584652		2154.43	0.0522928		2154.43	0.0484031		2154.43	0.046373
2420.13	0.108412		2420.13	0.0848798		2420.13	0.0645929		2420.13	0.0521928		2420.13	0.0466072		2420.13	0.0431166		2420.13	0.0413006
2718.59	0.101939		2718.59	0.0775869		2718.59	0.0579992		2718.59	0.0465684		2718.59	0.0415297		2718.59	0.0384025		2718.59	0.0367796
3053.86	0.0956628		3053.86	0.0707708		3053.86	0.0520137		3053.86	0.0415318		3053.86	0.0369982		3053.86	0.0342002		3053.86	0.032751
3430.47	0.0895985		3430.47	0.0644237		3430.47	0.0465948		3430.47	0.0370267		3430.47	0.0329561		3430.47	0.0304552		3430.47	0.029162
3853.53	0.0837576		3853.53	0.0585342		3853.53	0.0417004		3853.53	0.0330007		3853.53	0.0293519		3853.53	0.0271185		3853.53	0.025965
4328.76	0.0781495		4328.76	0.0530875		4328.76	0.0372891		4328.76	0.0294055		4328.76	0.0261394		4328.76	0.0241461		4328.76	0.0231177
4862.6	0.072781		4862.6	0.0480662		4862.6	0.0333203		4862.6	0.0261971		4862.6	0.0232766		4862.6	0.0214987		4862.6	0.0205821
5462.28	0.067657		5462.28	0.0434507		5462.28	0.0297556		5462.28	0.0233351		5462.28	0.0207261		5462.28	0.0191408		5462.28	0.0183241
6135.91	0.0627804		6135.91	0.0392201		6135.91	0.0265581		6135.91	0.0207833		6135.91	0.0184542		6135.91	0.0170412		6135.91	0.0163135
6892.61	0.0581521		6892.61	0.0353525		6892.61	0.0236936		6892.61	0.0185087		6892.61	0.0164307		6892.61	0.0151715		6892.61	0.0145234
7742.64	0.0537713		7742.64	0.0318255		7742.64	0.0211301		7742.64	0.0164817		7742.64	0.0146286		7742.64	0.0135067		7742.64	0.0129295
8697.49	0.0496356		8697.49	0.0286164		8697.49	0.018838		8697.49	0.0146758		8697.49	0.0130238		8697.49	0.0120245		8697.49	0.0115104
9770.1	0.0457413		9770.1	0.0257028		9770.1	0.01679		9770.1	0.0130672		9770.1	0.0115948		9770.1	0.0107048		9770.1	0.010247
10975	0.0420834		10975	0.0230627		10975	0.0149613		10975	0.0116344		10975	0.0103225		10975	0.00952989		10975	0.00912226
12328.5	0.0386558		12328.5	0.020675		12328.5	0.0133294		12328.5	0.0103584		12328.5	0.00918968		12328.5	0.00848386		12328.5	0.00812092
13848.9	0.0354515		13848.9	0.018519		13848.9	0.0118737		13848.9	0.00922206		13848.9	0.00818109		13848.9	0.00755261		13848.9	0.00722946
15556.8	0.0324627		15556.8	0.0165754		15556.8	0.0105757		15556.8	0.00821024		15556.8	0.00728315		15556.8	0.00672355		15556.8	0.00643585
17475.3	0.0296812		17475.3	0.0148258		17475.3	0.00941863		17475.3	0.00730932		17475.3	0.00648372		17475.3	0.00598548		17475.3	0.00572934
19630.4	0.0270981		19630.4	0.0132527		19630.4	0.00838745		19630.4	0.00650718		19630.4	0.00577201		19630.4	0.00532841		19630.4	0.00510038
22051.3	0.0247041		22051.3	0.0118401		22051.3	0.00746868		22051.3	0.00579301		22051.3	0.0051384		22051.3	0.00474347		22051.3	0.00454046
24770.8	0.0224898		24770.8	0.010573		24770.8	0.00665018		24770.8	0.00515718		24770.8	0.00457434		24770.8	0.00422274		24770.8	0.004042
27825.6	0.0204457		27825.6	0.00943743		27825.6	0.00592113		27825.6	0.00459111		27825.6	0.00407218		27825.6	0.00375916		27825.6	0.00359826
31257.2	0.0185623		31257.2	0.00842064		31257.2	0.00527182		31257.2	0.00408716		31257.2	0.00362514		31257.2	0.00334647		31257.2	0.00320324
35111.9	0.01683		35111.9	0.00751091		35111.9	0.00469358		35111.9	0.0036385		35111.9	0.00322718		35111.9	0.00297909		35111.9	0.00285158
39442.1	0.0152394		39442.1	0.00669751		39442.1	0.00417867		39442.1	0.00323909		39442.1	0.0028729		39442.1	0.00265204		39442.1	0.00253852
44306.2	0.0137815		44306.2	0.00597069		44306.2	0.00372018		44306.2	0.00288351		44306.2	0.0025575		44306.2	0.00236089		44306.2	0.00225983
49770.2	0.0124474		49770.2	0.00532158		49770.2	0.00331194		49770.2	0.00256697		49770.2	0.00227674		49770.2	0.0021017		49770.2	0.00201174
55908.1	0.0112284		55908.1	0.00474214		55908.1	0.00294847		55908.1	0.00228517		55908.1	0.00202679		55908.1	0.00187097		55908.1	0.00179088
62802.9	0.0101166		62802.9	0.00422511		62802.9	0.00262487		62802.9	0.0020343		62802.9	0.00180428		62802.9	0.00166557		62802.9	0.00159427
70548	0.00910404		70548	0.00376392		70548	0.00233677		70548	0.00181097		70548	0.0016062		70548	0.00148271		70548	0.00141924
79248.3	0.0081834		79248.3	0.00335267		79248.3	0.00208027		79248.3	0.00161216		79248.3	0.00142987		79248.3	0.00131993		79248.3	0.00126343
89021.5	0.00734771		89021.5	0.00298606		89021.5	0.00185192		89021.5	0.00143517		89021.5	0.00127289		89021.5	0.00117503		89021.5	0.00112473
100000	0.0065904		100000	0.00265931		100000	0.00164863		100000	0.00127761		100000	0.00113315		100000	0.00104603		100000	0.00100125

## Sheet: 3a
	xi',sigma=2.00			xi',sigma=1.40			xi',sigma=1.00			xi',sigma=0.70			xi',sigma=0.50			xi',sigma=0.30			xi',sigma=0.05
1	0.981844		1	0.996669		1	0.999281		1	0.999734		1	0.999835		1	0.99988		1	0.9999
1.12332	0.979383		1.12332	0.995963		1.12332	0.999098		1.12332	0.999665		1.12332	0.999792		1.12332	0.999849		1.12332	0.999873
1.26186	0.976641		1.26186	0.99512		1.26186	0.99887		1.26186	0.999577		1.26186	0.999738		1.26186	0.999809		1.26186	0.99984
1.41747	0.973596		1.41747	0.994119		1.41747	0.998585		1.41747	0.999467		1.41747	0.999669		1.41747	0.99976		1.41747	0.999798
1.59228	0.970223		1.59228	0.992933		1.59228	0.998231		1.59228	0.999328		1.59228	0.999582		1.59228	0.999697		1.59228	0.999745
1.78865	0.966497		1.78865	0.991534		1.78865	0.997791		1.78865	0.999153		1.78865	0.999473		1.78865	0.999617		1.78865	0.999679
2.00923	0.962391		2.00923	0.989889		2.00923	0.997246		2.00923	0.998932		2.00923	0.999336		2.00923	0.999517		2.00923	0.999594
2.25702	0.95788		2.25702	0.987962		2.25702	0.996574		2.25702	0.998655		2.25702	0.999162		2.25702	0.999391		2.25702	0.999488
2.53536	0.952936		2.53536	0.985715		2.53536	0.995746		2.53536	0.998307		2.53536	0.998943		2.53536	0.999231		2.53536	0.999354
2.84804	0.947533		2.84804	0.983104		2.84804	0.99473		2.84804	0.997869		2.84804	0.998667		2.84804	0.99903		2.84804	0.999185
3.19927	0.941645		3.19927	0.980082		3.19927	0.993487		3.19927	0.997321		3.19927	0.99832		3.19927	0.998777		3.19927	0.998972
3.59381	0.935246		3.59381	0.976601		3.59381	0.991972		3.59381	0.996633		3.59381	0.997883		3.59381	0.998457		3.59381	0.998704
4.03702	0.928309		4.03702	0.972607		4.03702	0.990133		4.03702	0.995774		4.03702	0.997332		4.03702	0.998054		4.03702	0.998365
4.53488	0.920812		4.53488	0.968043		4.53488	0.98791		4.53488	0.994701		4.53488	0.99664		4.53488	0.997547		4.53488	0.997937
5.09414	0.912731		5.09414	0.962852		5.09414	0.985235		5.09414	0.993364		5.09414	0.99577		5.09414	0.996907		5.09414	0.997399
5.72237	0.904044		5.72237	0.956973		5.72237	0.982031		5.72237	0.991704		5.72237	0.994678		5.72237	0.996102		5.72237	0.99672
6.42807	0.894733		6.42807	0.950344		6.42807	0.978213		6.42807	0.989646		6.42807	0.993308		6.42807	0.995088		6.42807	0.995865
7.22081	0.884779		7.22081	0.942903		7.22081	0.973686		7.22081	0.987106		7.22081	0.991593		7.22081	0.993813		7.22081	0.994787
8.11131	0.874169		8.11131	0.93459		8.11131	0.968348		8.11131	0.983981		8.11131	0.989451		8.11131	0.992211		8.11131	0.993432
9.11163	0.86289		9.11163	0.925344		9.11163	0.962091		9.11163	0.980153		9.11163	0.986779		9.11163	0.990199		9.11163	0.991726
10.2353	0.850934		10.2353	0.915108		10.2353	0.954798		10.2353	0.975487		10.2353	0.983457		10.2353	0.987678		10.2353	0.989582
11.4976	0.838295		11.4976	0.903831		11.4976	0.94635		11.4976	0.96983		11.4976	0.97934		11.4976	0.984521		11.4976	0.98689
12.9155	0.824973		12.9155	0.891463		12.9155	0.936627		12.9155	0.96301		12.9155	0.974256		12.9155	0.980579		12.9155	0.983514
14.5083	0.810969		14.5083	0.877965		14.5083	0.925508		14.5083	0.95484		14.5083	0.968006		14.5083	0.975666		14.5083	0.979288
16.2975	0.796291		16.2975	0.863304		16.2975	0.912878		16.2975	0.945122		16.2975	0.960363		16.2975	0.969563		16.2975	0.974007
18.3074	0.780948		18.3074	0.847455		18.3074	0.89863		18.3074	0.933648		18.3074	0.951072		18.3074	0.962011		18.3074	0.967424
20.5651	0.764956		20.5651	0.830407		20.5651	0.882668		20.5651	0.920206		20.5651	0.939854		20.5651	0.952707		20.5651	0.959245
23.1013	0.748335		23.1013	0.812157		23.1013	0.864914		23.1013	0.904593		23.1013	0.926412		23.1013	0.941307		23.1013	0.94912
25.9502	0.731108		25.9502	0.792717		25.9502	0.845311		25.9502	0.886619		25.9502	0.910444		25.9502	0.927431		25.9502	0.936649
29.1505	0.713305		29.1505	0.772111		29.1505	0.823826		29.1505	0.866121		29.1505	0.891652		29.1505	0.91067		29.1505	0.921375
32.7455	0.694957		32.7455	0.750376		32.7455	0.800455		32.7455	0.842973		32.7455	0.869767		32.7455	0.890609		32.7455	0.902805
36.7838	0.676101		36.7838	0.727566		36.7838	0.775226		36.7838	0.817098		36.7838	0.844564		36.7838	0.866847		36.7838	0.880421
41.3201	0.656779		41.3201	0.703745		41.3201	0.7482		41.3201	0.788481		41.3201	0.815889		41.3201	0.839037		41.3201	0.853723
46.4159	0.637035		46.4159	0.678993		46.4159	0.719475		46.4159	0.757173		46.4159	0.783685		46.4159	0.806926		46.4159	0.822275
52.1401	0.616917		52.1401	0.653403		52.1401	0.689184		52.1401	0.723305		52.1401	0.748006		52.1401	0.770404		52.1401	0.785771
58.5702	0.596476		58.5702	0.627078		58.5702	0.657493		58.5702	0.687083		58.5702	0.70904		58.5702	0.729545		58.5702	0.744112
65.7933	0.575765		65.7933	0.600135		65.7933	0.624603		65.7933	0.648796		65.7933	0.667114		65.7933	0.684646		65.7933	0.697481
73.9072	0.554842		73.9072	0.572696		73.9072	0.59074		73.9072	0.608803		73.9072	0.622691		73.9072	0.63624		73.9072	0.646402
83.0218	0.533763		83.0218	0.544894		83.0218	0.556157		83.0218	0.567525		83.0218	0.576359		83.0218	0.585092		83.0218	0.591754
93.2603	0.512588		93.2603	0.516867		93.2603	0.521121		93.2603	0.525435		93.2603	0.528806		93.2603	0.532161		93.2603	0.534745
104.762	0.491377		104.762	0.488754		104.762	0.485915		104.762	0.483036		104.762	0.480786		104.762	0.478544		104.762	0.476816
117.681	0.47019		117.681	0.460697		117.681	0.450823		117.681	0.440844		117.681	0.433078		117.681	0.425386		117.681	0.419503
132.194	0.449087		132.194	0.432839		132.194	0.416127		132.194	0.399365		132.194	0.386444		132.194	0.373799		132.194	0.364277
148.497	0.428128		148.497	0.405317		148.497	0.3821		148.497	0.359079		148.497	0.341588		148.497	0.324776		148.497	0.312402
166.81	0.40737		166.81	0.378264		166.81	0.348996		166.81	0.320419		166.81	0.299121		166.81	0.279125		166.81	0.264828
187.382	0.386871		187.382	0.351806		187.382	0.317048		187.382	0.28376		187.382	0.259532		187.382	0.237427		187.382	0.22215
210.49	0.366684		210.49	0.326061		210.49	0.286463		210.49	0.249401		210.49	0.223177		210.49	0.200025		210.49	0.184615
236.449	0.346861		236.449	0.301134		236.449	0.257413		236.449	0.217569		236.449	0.190269		236.449	0.167036		236.449	0.152174
265.609	0.327451		265.609	0.27712		265.609	0.230039		265.609	0.188407		265.609	0.16089		265.609	0.138382		265.609	0.124558
298.365	0.308499		298.365	0.254101		298.365	0.204444		298.365	0.161983		298.365	0.135003		298.365	0.113836		298.365	0.10135
335.16	0.290046		335.16	0.232147		335.16	0.180698		335.16	0.138294		335.16	0.11247		335.16	0.0930649		335.16	0.0820586
376.494	0.272131		376.494	0.211312		376.494	0.158835		376.494	0.117274		376.494	0.0930796		376.494	0.0756775		376.494	0.0661664
422.924	0.254786		422.924	0.191636		422.924	0.138857		422.924	0.0988077		422.924	0.0765696		422.924	0.0612576		422.924	0.0531723
475.081	0.238042		475.081	0.173147		475.081	0.120738		475.081	0.0827368		475.081	0.0626468		475.081	0.049394		475.081	0.0426126
533.67	0.221923		533.67	0.155858		533.67	0.104423		533.67	0.0688768		533.67	0.051008		533.67	0.0396994		533.67	0.0340739
599.484	0.206449		599.484	0.13977		599.484	0.0898389		599.484	0.0570254		599.484	0.0413545		599.484	0.0318221		599.484	0.0271971
673.415	0.191636		673.415	0.124873		673.415	0.0768934		673.415	0.0469728		673.415	0.0334033		673.415	0.0254516		673.415	0.0216767
756.463	0.177497		756.463	0.111145		756.463	0.0654813		756.463	0.0385101		756.463	0.0268941		756.463	0.0203198		756.463	0.0172568
849.753	0.164038		849.753	0.098554		849.753	0.0554884		849.753	0.0314357		849.753	0.0215937		849.753	0.0161989		849.753	0.0137254
954.548	0.151263		954.548	0.0870619		954.548	0.0467954		954.548	0.0255599		954.548	0.0172976		954.548	0.0128984		954.548	0.0109085
1072.27	0.139171		1072.27	0.0766221		1072.27	0.0392812		1072.27	0.0207086		1072.27	0.0138289		1072.27	0.0102606		1072.27	0.0086646
1204.5	0.127757		1204.5	0.0671827		1204.5	0.032826		1204.5	0.0167247		1204.5	0.0110378		1204.5	0.00815597		1204.5	0.00687904
1353.05	0.117014		1353.05	0.0586875		1353.05	0.0273134		1353.05	0.0134692		1353.05	0.00879804		1353.05	0.00647905		1353.05	0.00545939
1519.91	0.10693		1519.91	0.0510773		1519.91	0.0226328		1519.91	0.0108204		1519.91	0.00700496		1519.91	0.00514438		1519.91	0.00433143
1707.35	0.0974912		1707.35	0.0442909		1707.35	0.0186805		1707.35	0.00867364		1707.35	0.00557224		1707.35	0.00408305		1707.35	0.0034357
1917.91	0.0886811		1917.91	0.0382666		1917.91	0.0153607		1917.91	0.00693975		1917.91	0.00442926		1917.91	0.00323966		1917.91	0.0027247
2154.43	0.0804804		2154.43	0.0329426		2154.43	0.0125863		2154.43	0.00554351		2154.43	0.00351861		2154.43	0.00256984		2154.43	0.00216051
2420.13	0.0728682		2420.13	0.0282582		2420.13	0.0102786		2420.13	0.00442209		2420.13	0.00279384		2420.13	0.00203811		2420.13	0.00171294
2718.59	0.0658217		2718.59	0.0241545		2718.59	0.00836797		2718.59	0.00352343		2718.59	0.00221749		2718.59	0.00161614		2718.59	0.00135797
3053.86	0.0593168		3053.86	0.020575		3053.86	0.0067927		3053.86	0.00280464		3053.86	0.00175948		3053.86	0.00128138		3053.86	0.00107647
3430.47	0.0533285		3430.47	0.017466		3430.47	0.00549916		3430.47	0.00223067		3430.47	0.00139573		3430.47	0.00101586		3430.47	0.000853277
3853.53	0.0478308		3853.53	0.0147768		3853.53	0.00444092		3853.53	0.00177296		3853.53	0.00110695		3853.53	0.000805295		3853.53	0.000676329
4328.76	0.0427974		4328.76	0.0124602		4328.76	0.00357819		4328.76	0.00140838		4328.76	0.000877783		4328.76	0.000638335		4328.76	0.000536055
4862.6	0.0382016		4862.6	0.0104727		4862.6	0.0028771		4862.6	0.00111826		4862.6	0.00069597		4862.6	0.000505966		4862.6	0.000424862
5462.28	0.0340168		5462.28	0.00877419		5462.28	0.00230904		5462.28	0.000887571		5462.28	0.00055176		5462.28	0.000401029		5462.28	0.000336726
6135.91	0.0302165		6135.91	0.00732832		6135.91	0.00185002		6135.91	0.000704256		6135.91	0.000437396		6135.91	0.000317847		6135.91	0.000266868
6892.61	0.0267747		6892.61	0.00610214		6892.61	0.00148002		6892.61	0.000558665		6892.61	0.000346714		6892.61	0.000251912		6892.61	0.0002115
7742.64	0.0236661		7742.64	0.0050661		7742.64	0.00118243		7742.64	0.000443084		7742.64	0.000274818		7742.64	0.000199651		7742.64	0.000167618
8697.49	0.0208659		8697.49	0.00419389		8697.49	0.000943554		8697.49	0.000351359		8697.49	0.000217823		8697.49	0.000158229		8697.49	0.000132839
9770.1	0.0183503		9770.1	0.00346216		9770.1	0.000752155		9770.1	0.000278587		9770.1	0.000172642		9770.1	0.0001254		9770.1	0.000105276
10975	0.0160964		10975	0.0028504		10975	0.000599037		10975	0.000220864		10975	0.000136829		10975	9.9381e-05		10975	8.34309e-05
12328.5	0.0140824		12328.5	0.00234062		12328.5	0.000476715		12328.5	0.000175087		12328.5	0.000108443		12328.5	7.87601e-05		12328.5	6.61187e-05
13848.9	0.0122875		13848.9	0.00191718		13848.9	0.000379113		13848.9	0.000138789		13848.9	8.59445e-05		13848.9	6.24175e-05		13848.9	5.23987e-05
15556.8	0.0106922		15556.8	0.00156655		15556.8	0.000301318		15556.8	0.00011001		15556.8	6.81128e-05		15556.8	4.94657e-05		15556.8	4.15255e-05
17475.3	0.00927796		17475.3	0.00127709		17475.3	0.000239369		17475.3	8.71952e-05		17475.3	5.39803e-05		17475.3	3.92013e-05		17475.3	3.29086e-05
19630.4	0.00802767		19630.4	0.0010388		19630.4	0.000190076		19630.4	6.91095e-05		19630.4	4.27798e-05		19630.4	3.10667e-05		19630.4	2.60797e-05
22051.3	0.00692528		22051.3	0.000843193		22051.3	0.000150881		22051.3	5.47737e-05		22051.3	3.39031e-05		22051.3	2.46201e-05		22051.3	2.06678e-05
24770.8	0.00595592		24770.8	0.000683038		24770.8	0.000119733		24770.8	4.34107e-05		24770.8	2.68681e-05		24770.8	1.95111e-05		24770.8	1.63789e-05
27825.6	0.00510589		27825.6	0.000552245		27825.6	9.49912e-05		27825.6	3.44044e-05		27825.6	2.12928e-05		27825.6	1.54623e-05		27825.6	1.29801e-05
31257.2	0.00436261		31257.2	0.000445689		31257.2	7.53468e-05		31257.2	2.72663e-05		31257.2	1.68744e-05		31257.2	1.22537e-05		31257.2	1.02865e-05
35111.9	0.00371455		35111.9	0.000359078		35111.9	5.97549e-05		35111.9	2.16089e-05		35111.9	1.33728e-05		35111.9	9.71087e-06		35111.9	8.15191e-06
39442.1	0.00315124		39442.1	0.000288832		39442.1	4.73829e-05		39442.1	1.71253e-05		39442.1	1.05978e-05		39442.1	7.69572e-06		39442.1	6.46026e-06
44306.2	0.00266315		44306.2	0.000231976		44306.2	3.75681e-05		44306.2	1.35718e-05		44306.2	8.39863e-06		44306.2	6.09874e-06		44306.2	5.11965e-06
49770.2	0.00224167		49770.2	0.000186047		49770.2	2.97836e-05		49770.2	1.07556e-05		49770.2	6.6558e-06		49770.2	4.83316e-06		49770.2	4.05724e-06
55908.1	0.00187906		55908.1	0.000149014		55908.1	2.36104e-05		55908.1	8.5238e-06		55908.1	5.27463e-06		55908.1	3.8302e-06		55908.1	3.2153e-06
62802.9	0.00156833		62802.9	0.000119206		62802.9	1.87155e-05		62802.9	6.75505e-06		62802.9	4.18007e-06		62802.9	3.03537e-06		62802.9	2.54807e-06
70548	0.00130322		70548	9.52505e-05		70548	1.48347e-05		70548	5.35331e-06		70548	3.31264e-06		70548	2.40548e-06		70548	2.0193e-06
79248.3	0.00107807		79248.3	7.60291e-05		79248.3	1.17581e-05		79248.3	4.24244e-06		79248.3	2.62521e-06		79248.3	1.9063e-06		79248.3	1.60026e-06
89021.5	0.000887841		89021.5	6.0628e-05		89021.5	9.31929e-06		89021.5	3.36208e-06		89021.5	2.08044e-06		89021.5	1.51071e-06		89021.5	1.26818e-06
100000	0.000727968		100000	4.83041e-05		100000	7.38613e-06		100000	2.66441e-06		100000	1.64872e-06		100000	1.19722e-06		100000	1.00501e-06

## Sheet: 3d
$f/f_{Bm}^\prime$	zero cross V_2'',sigma=2.00		$f/f_{Bm}^\prime$	V_2'',sigma=2.00		$f/f_{Bm}^\prime$	zero cross V_2'',sigma=1.40		$f/f_{Bm}^\prime$	V_2'',sigma=1.40		$f/f_{Bm}^\prime$	zero cross V_2'',sigma=1.00		$f/f_{Bm}^\prime$	V_2'',sigma=1.00		$f/f_{Bm}^\prime$	zero cross V_2'',sigma=0.70		$f/f_{Bm}^\prime$	V_2'',sigma=0.70		$f/f_{Bm}^\prime$	zero cross V_2'',sigma=0.50		$f/f_{Bm}^\prime$	V_2'',sigma=0.50		$f/f_{Bm}^\prime$	zero cross V_2'',sigma=0.30		$f/f_{Bm}^\prime$	V_2'',sigma=0.30		$f/f_{Bm}^\prime$	zero cross V_2'',sigma=0.05		$f/f_{Bm}^\prime$	V_2'',sigma=0.05
5277.39	0		1	0.961816		715.765	0		1	0.991123		271.915	0		1	0.997876		165.409	0		1	0.999203		130.068	0		1	0.999506		110.11	0		1	0.999641		101.425	0		1	0.999699
			1.12332	0.957046					1.12332	0.989335					1.12332	0.997342					1.12332	0.998995					1.12332	0.999376					1.12332	0.999547					1.12332	0.99962
			1.26186	0.951797					1.26186	0.987228					1.26186	0.996679					1.26186	0.998733					1.26186	0.999213					1.26186	0.999428					1.26186	0.99952
			1.41747	0.946038					1.41747	0.984754					1.41747	0.995858					1.41747	0.998404					1.41747	0.999008					1.41747	0.999279					1.41747	0.999394
			1.59228	0.939735					1.59228	0.981861					1.59228	0.994842					1.59228	0.997989					1.59228	0.998748					1.59228	0.99909					1.59228	0.999236
			1.78865	0.932859					1.78865	0.978492					1.78865	0.993589					1.78865	0.997467					1.78865	0.998421					1.78865	0.998852					1.78865	0.999036
			2.00923	0.925379					2.00923	0.974585					2.00923	0.992051					2.00923	0.996812					2.00923	0.998009					2.00923	0.998552					2.00923	0.998784
			2.25702	0.917265					2.25702	0.970075					2.25702	0.990167					2.25702	0.995989					2.25702	0.99749					2.25702	0.998173					2.25702	0.998465
			2.53536	0.908489					2.53536	0.96489					2.53536	0.987869					2.53536	0.994957					2.53536	0.996836					2.53536	0.997695					2.53536	0.998064
			2.84804	0.899026					2.84804	0.958957					2.84804	0.985076					2.84804	0.993665					2.84804	0.996012					2.84804	0.997093					2.84804	0.997558
			3.19927	0.888851					3.19927	0.952199					3.19927	0.981699					3.19927	0.992051					3.19927	0.994976					3.19927	0.996335					3.19927	0.996919
			3.59381	0.877944					3.59381	0.944538					3.59381	0.977633					3.59381	0.990036					3.59381	0.993672					3.59381	0.995378					3.59381	0.996114
			4.03702	0.866287					4.03702	0.935894					4.03702	0.972761					4.03702	0.98753					4.03702	0.992035					4.03702	0.994174					4.03702	0.9951
			4.53488	0.853864					4.53488	0.926187					4.53488	0.966955					4.53488	0.98442					4.53488	0.989979					4.53488	0.992657					4.53488	0.993821
			5.09414	0.840666					5.09414	0.915341					5.09414	0.960074					5.09414	0.980572					5.09414	0.987403					5.09414	0.990748					5.09414	0.99221
			5.72237	0.826687					5.72237	0.903281					5.72237	0.951967					5.72237	0.97583					5.72237	0.98418					5.72237	0.988348					5.72237	0.990182
			6.42807	0.811925					6.42807	0.88994					6.42807	0.942473					6.42807	0.970011					6.42807	0.980155					6.42807	0.985332					6.42807	0.987628
			7.22081	0.796383					7.22081	0.875256					7.22081	0.931426					7.22081	0.962903					7.22081	0.97514					7.22081	0.981547					7.22081	0.984417
			8.11131	0.78007					8.11131	0.859177					8.11131	0.918656					8.11131	0.954269					8.11131	0.968911					8.11131	0.976804					8.11131	0.980382
			9.11163	0.763001					9.11163	0.841662					9.11163	0.903999					9.11163	0.943842					9.11163	0.961201					9.11163	0.97087					9.11163	0.975316
			10.2353	0.745194					10.2353	0.822685					10.2353	0.887295					10.2353	0.931335					10.2353	0.951698					10.2353	0.963462					10.2353	0.968966
			11.4976	0.726676					11.4976	0.802231					11.4976	0.868398					11.4976	0.916439					11.4976	0.940043					11.4976	0.954238					11.4976	0.961018
			12.9155	0.707478					12.9155	0.780307					12.9155	0.847186					12.9155	0.898841					12.9155	0.925832					12.9155	0.942793					12.9155	0.951092
			14.5083	0.687637					14.5083	0.756933					14.5083	0.82356					14.5083	0.878227					14.5083	0.908621					14.5083	0.928648					14.5083	0.93873
			16.2975	0.667195					16.2975	0.732152					16.2975	0.797459					16.2975	0.854305					16.2975	0.88794					16.2975	0.911256					16.2975	0.923384
			18.3074	0.6462					18.3074	0.706026					18.3074	0.768865					18.3074	0.826818					18.3074	0.863307					18.3074	0.889999					18.3074	0.904414
			20.5651	0.624705					20.5651	0.678635					20.5651	0.737806					20.5651	0.795569					20.5651	0.834262					20.5651	0.86421					20.5651	0.881086
			23.1013	0.602768					23.1013	0.650083					23.1013	0.704364					23.1013	0.760441					23.1013	0.800397					23.1013	0.833201					23.1013	0.852586
			25.9502	0.580451					25.9502	0.620492					25.9502	0.668679					25.9502	0.721419					25.9502	0.761404					25.9502	0.796305					25.9502	0.818044
			29.1505	0.55782					29.1505	0.590002					29.1505	0.63095					29.1505	0.678613					29.1505	0.717121					29.1505	0.752948					29.1505	0.776595
			32.7455	0.534944					32.7455	0.55877					32.7455	0.591433					32.7455	0.63227					32.7455	0.667586					32.7455	0.702736					32.7455	0.727463
			36.7838	0.511895					36.7838	0.526969					36.7838	0.550441					36.7838	0.582785					36.7838	0.613077					36.7838	0.645554					36.7838	0.670084
			41.3201	0.488747					41.3201	0.494783					41.3201	0.508335					41.3201	0.530703					41.3201	0.554149					41.3201	0.581681					41.3201	0.604276
			46.4159	0.465575					46.4159	0.462406					46.4159	0.465519					46.4159	0.476706					46.4159	0.49165					46.4159	0.511877					46.4159	0.530425
			52.1401	0.442456					52.1401	0.430037					52.1401	0.422429					52.1401	0.421597					52.1401	0.426703					52.1401	0.437447					52.1401	0.449667
			58.5702	0.419466					58.5702	0.39788					58.5702	0.379519					58.5702	0.366268					58.5702	0.360674					58.5702	0.360235					58.5702	0.364017
			65.7933	0.396678					65.7933	0.366134					65.7933	0.337252					65.7933	0.311663					65.7933	0.295093					65.7933	0.282541					65.7933	0.276367
			73.9072	0.374168					73.9072	0.334996					73.9072	0.296079					73.9072	0.258731					73.9072	0.231565					73.9072	0.206954					73.9072	0.190309
			83.0218	0.352007					83.0218	0.304654					83.0218	0.256434					83.0218	0.208382					83.0218	0.171656					83.0218	0.136112					83.0218	0.109753
			93.2603	0.330262					93.2603	0.275285					93.2603	0.218711					93.2603	0.161439					93.2603	0.116777					93.2603	0.0724262					93.2603	0.0383914
			104.762	0.308999					104.762	0.247049					104.762	0.183259					104.762	0.118596					104.762	0.0680835					104.762	0.0178152					104.762	-0.0208703
			117.681	0.288278					117.681	0.220092					117.681	0.15037					117.681	0.0803846					117.681	0.0263916					117.681	-0.0264967					117.681	-0.066357
			132.194	0.268156					132.194	0.194536					132.194	0.12027					132.194	0.0471564					132.194	-0.00786667					132.194	-0.0600791					132.194	-0.0978134
			148.497	0.248684					148.497	0.170486					148.497	0.0931147					148.497	0.01907					148.497	-0.0346517					148.497	-0.0832788					148.497	-0.116292
			166.81	0.229906					166.81	0.14802					166.81	0.0689911					166.81	-0.00390294					166.81	-0.0542872					166.81	-0.0970958					166.81	-0.123804
			187.382	0.211864					187.382	0.127196					187.382	0.0479142					187.382	-0.021962					187.382	-0.0673984					187.382	-0.102987					187.382	-0.122853
			210.49	0.194589					210.49	0.108047					210.49	0.029834					210.49	-0.035452					210.49	-0.074831					210.49	-0.10264					210.49	-0.115997
			236.449	0.178111					236.449	0.0905839					236.449	0.0146406					236.449	-0.0448304					236.449	-0.0775592					236.449	-0.0977679					236.449	-0.105527
			265.609	0.162449					265.609	0.0747963					265.609	0.00217324					265.609	-0.0506307					265.609	-0.076598					265.609	-0.0899384					265.609	-0.0932906
			298.365	0.147619					298.365	0.0606528					298.365	-0.00777044					298.365	-0.0534262					298.365	-0.0729268					298.365	-0.0804748					298.365	-0.0806405
			335.16	0.133631					335.16	0.0481041					335.16	-0.0154238					335.16	-0.0537963					335.16	-0.0674318					335.16	-0.070408					335.16	-0.0684776
			376.494	0.120486					376.494	0.037085					376.494	-0.0210405					376.494	-0.052297					376.494	-0.0608685					376.494	-0.0604791					376.494	-0.0573339
			422.924	0.108182					422.924	0.0275164					422.924	-0.0248846					422.924	-0.0494387					422.924	-0.0538449					422.924	-0.0511723					422.924	-0.0474669
			475.081	0.0967116					475.081	0.0193082					475.081	-0.0272206					475.081	-0.0456707					475.081	-0.0468206					475.081	-0.0427641					475.081	-0.0389476
			533.67	0.086061					533.67	0.0123619					533.67	-0.0283056					533.67	-0.041372					533.67	-0.040119					533.67	-0.0353759					533.67	-0.0317301
			599.484	0.0762126					599.484	0.00657322					599.484	-0.0283824					599.484	-0.036849					599.484	-0.0339464					599.484	-0.0290218					599.484	-0.0257037
			673.415	0.0671444					673.415	0.00183433					673.415	-0.0276744					673.415	-0.032338					673.415	-0.0284153					673.415	-0.0236482					673.415	-0.0207279
			756.463	0.0588307					756.463	-0.00196349					756.463	-0.0263816					756.463	-0.0280107					756.463	-0.0235673					756.463	-0.0191639					756.463	-0.0166554
			849.753	0.0512428					849.753	-0.00492792					849.753	-0.0246786					849.753	-0.0239828					849.753	-0.0193938					849.753	-0.0154609					849.753	-0.0133449
			954.548	0.044349					954.548	-0.00716368					954.548	-0.022714					954.548	-0.0203237					954.548	-0.0158538					954.548	-0.0124288					954.548	-0.0106682
			1072.27	0.0381154					1072.27	-0.00877103					1072.27	-0.0206106					1072.27	-0.0170659					1072.27	-0.0128879					1072.27	-0.00996251					1072.27	-0.00851297
			1204.5	0.0325065					1204.5	-0.00984442					1204.5	-0.0184668					1204.5	-0.0142145					1204.5	-0.0104281					1204.5	-0.00796716					1204.5	-0.00678346
			1353.05	0.0274854					1353.05	-0.0104715					1353.05	-0.0163584					1353.05	-0.0117549					1353.05	-0.00840501					1353.05	-0.00635966					1353.05	-0.00539919
			1519.91	0.0230145					1519.91	-0.0107326					1519.91	-0.0143415					1519.91	-0.00965956					1519.91	-0.00675274					1519.91	-0.00506899					1519.91	-0.00429353
			1707.35	0.0190559					1707.35	-0.0107					1707.35	-0.0124548					1707.35	-0.00789388					1707.35	-0.00541099					1707.35	-0.00403549					1707.35	-0.00341186
			1917.91	0.0155716					1917.91	-0.010438					1917.91	-0.0107227					1917.91	-0.00641988					1917.91	-0.0043265					1917.91	-0.00320969					1917.91	-0.0027097
			2154.43	0.0125239					2154.43	-0.0100029					2154.43	-0.00915792					2154.43	-0.00519931					2154.43	-0.0034533					2154.43	-0.00255097					2154.43	-0.00215108
			2420.13	0.00987627					2420.13	-0.00944322					2420.13	-0.00776395					2420.13	-0.00419567					2420.13	-0.00275242					2420.13	-0.00202623					2420.13	-0.00170702
			2718.59	0.00759279					2718.59	-0.00880006					2718.59	-0.00653746					2718.59	-0.00337535					2718.59	-0.00219127					2718.59	-0.00160867					2718.59	-0.00135424
			3053.86	0.00563901					3053.86	-0.00810762					3053.86	-0.00547022					3053.86	-0.00270833					3053.86	-0.00174291					3053.86	-0.00127668					3053.86	-0.00107413
			3430.47	0.00398196					3430.47	-0.00739375					3430.47	-0.00455076					3430.47	-0.00216832					3430.47	-0.00138527					3430.47	-0.00101291					3430.47	-0.000851807
			3853.53	0.00259032					3853.53	-0.0066806					3853.53	-0.00376573					3853.53	-0.00173278					3853.53	-0.00110036					3853.53	-0.000803438					3853.53	-0.000675405
			4328.76	0.00143458					4328.76	-0.0059853					4328.76	-0.00310093					4328.76	-0.00138258					4328.76	-0.000873627					4328.76	-0.000637168					4328.76	-0.000535475
			4862.6	0.00048709					4862.6	-0.00532057					4862.6	-0.0025421					4862.6	-0.00110175					4862.6	-0.000693353					4862.6	-0.000505232					4862.6	-0.000424498
			5462.28	-0.000277808					5462.28	-0.00469536					5462.28	-0.00207551					5462.28	-0.000877038					5462.28	-0.000550113					5462.28	-0.000400569					5462.28	-0.000336497
			6135.91	-0.00088381					6135.91	-0.00411553					6135.91	-0.0016883					6135.91	-0.000697554					6135.91	-0.00043636					6135.91	-0.000317557					6135.91	-0.000266725
			6892.61	-0.00135263					6892.61	-0.00358431					6892.61	-0.00136875					6892.61	-0.000554409					6892.61	-0.000346062					6892.61	-0.00025173					6892.61	-0.00021141
			7742.64	-0.00170403					7742.64	-0.00310291					7742.64	-0.00110636					7742.64	-0.000440387					7742.64	-0.000274409					7742.64	-0.000199537					7742.64	-0.000167561
			8697.49	-0.00195585					8697.49	-0.0026709					8697.49	-0.000891866					8697.49	-0.000349653					8697.49	-0.000217565					8697.49	-0.000158158					8697.49	-0.000132803
			9770.1	-0.0021241					9770.1	-0.00228667					9770.1	-0.000717239					9770.1	-0.000277509					9770.1	-0.00017248					9770.1	-0.000125355					9770.1	-0.000105253
			10975	-0.00222303					10975	-0.0019477					10975	-0.000575585					10975	-0.000220184					10975	-0.000136727					10975	-9.93527e-05					10975	-8.34169e-05
			12328.5	-0.00226521					12328.5	-0.00165093					12328.5	-0.000461048					12328.5	-0.000174658					12328.5	-0.000108379					12328.5	-7.87423e-05					12328.5	-6.61099e-05
			13848.9	-0.00226167					13848.9	-0.00139292					13848.9	-0.000368701					13848.9	-0.000138519					13848.9	-8.59043e-05					13848.9	-6.24063e-05					13848.9	-5.23932e-05
			15556.8	-0.00222195					15556.8	-0.00117008					15556.8	-0.000294433					15556.8	-0.00010984					15556.8	-6.80876e-05					15556.8	-4.94587e-05					15556.8	-4.1522e-05
			17475.3	-0.00215427					17475.3	-0.000978787					17475.3	-0.000234837					17475.3	-8.7088e-05					17475.3	-5.39645e-05					17475.3	-3.91969e-05					17475.3	-3.29064e-05
			19630.4	-0.00206561					19630.4	-0.000815523					19630.4	-0.000187107					19630.4	-6.90421e-05					19630.4	-4.27698e-05					19630.4	-3.1064e-05					19630.4	-2.60783e-05
			22051.3	-0.00196181					22051.3	-0.000676937					22051.3	-0.000148944					22051.3	-5.47313e-05					22051.3	-3.38968e-05					22051.3	-2.46183e-05					22051.3	-2.06669e-05
			24770.8	-0.00184773					24770.8	-0.000559897					24770.8	-0.000118473					24770.8	-4.3384e-05					24770.8	-2.68642e-05					24770.8	-1.951e-05					24770.8	-1.63784e-05
			27825.6	-0.00172731					27825.6	-0.000461529					27825.6	-9.41757e-05					27825.6	-3.43877e-05					27825.6	-2.12904e-05					27825.6	-1.54616e-05					27825.6	-1.29797e-05
			31257.2	-0.00160373					31257.2	-0.000379229					31257.2	-7.48205e-05					31257.2	-2.72558e-05					31257.2	-1.68729e-05					31257.2	-1.22533e-05					31257.2	-1.02863e-05
			35111.9	-0.00147944					35111.9	-0.000310665					35111.9	-5.94163e-05					35111.9	-2.16023e-05					35111.9	-1.33718e-05					35111.9	-9.7106e-06					35111.9	-8.15177e-06
			39442.1	-0.00135633					39442.1	-0.000253774					39442.1	-4.71656e-05					39442.1	-1.71211e-05					39442.1	-1.05972e-05					39442.1	-7.69555e-06					39442.1	-6.46017e-06
			44306.2	-0.00123582					44306.2	-0.000206747					44306.2	-3.74291e-05					44306.2	-1.35692e-05					44306.2	-8.39825e-06					44306.2	-6.09864e-06					44306.2	-5.1196e-06
			49770.2	-0.00111896					49770.2	-0.000168011					49770.2	-2.96949e-05					49770.2	-1.0754e-05					49770.2	-6.65556e-06					49770.2	-4.83309e-06					49770.2	-4.05721e-06
			55908.1	-0.00100649					55908.1	-0.000136209					55908.1	-2.35538e-05					55908.1	-8.52277e-06					55908.1	-5.27448e-06					55908.1	-3.83016e-06					55908.1	-3.21527e-06
			62802.9	-0.000899023					62802.9	-0.000110182					62802.9	-1.86796e-05					62802.9	-6.7544e-06					62802.9	-4.17997e-06					62802.9	-3.03535e-06					62802.9	-2.54806e-06
			70548	-0.000797029					70548	-8.89409e-05					70548	-1.48119e-05					70548	-5.35291e-06					70548	-3.31258e-06					70548	-2.40547e-06					70548	-2.01929e-06
			79248.3	-0.000700961					79248.3	-7.16538e-05					79248.3	-1.17437e-05					79248.3	-4.24219e-06					79248.3	-2.62518e-06					79248.3	-1.90629e-06					79248.3	-1.60026e-06
			89021.5	-0.000611252					89021.5	-5.76199e-05					89021.5	-9.31014e-06					89021.5	-3.36192e-06					89021.5	-2.08042e-06					89021.5	-1.51071e-06					89021.5	-1.26818e-06
			100000	-0.000528315					100000	-4.62542e-05					100000	-7.38035e-06					100000	-2.66431e-06					100000	-1.6487e-06					100000	-1.19721e-06					100000	-1.00501e-06

## Sheet: 3c
$f/f_{Bm}^\prime$			$f/f_{Bm}^\prime$	max V_2',sigma=2.00		$f/f_{Bm}^\prime$	V_2',sigma=2.00		$f/f_{Bm}^\prime$	max V_2',sigma=1.40		$f/f_{Bm}^\prime$	V_2',sigma=1.40		$f/f_{Bm}^\prime$	max V_2',sigma=1.00		$f/f_{Bm}^\prime$	V_2',sigma=1.00		$f/f_{Bm}^\prime$	max V_2',sigma=0.70		$f/f_{Bm}^\prime$	V_2',sigma=0.70		$f/f_{Bm}^\prime$	max V_2',sigma=0.50		$f/f_{Bm}^\prime$	V_2',sigma=0.50		$f/f_{Bm}^\prime$	max V_2',sigma=0.30		$f/f_{Bm}^\prime$	V_2',sigma=0.30		$f/f_{Bm}^\prime$	max V_2',sigma=0.05		$f/f_{Bm}^\prime$	V_2',sigma=0.05
57.735	-6		42.0675	0.272885		1	0.0770482		44.7549	0.352617		1	0.0485338		47.6144	0.430055		1	0.0326681		50.6075	0.504035		1	0.0255164		53.0027	0.55893		1	0.0226507		55.5584	0.609685		1	0.0209146		57.5492	0.648187		1	0.020021
57.735	1					1.12332	0.0829418					1.12332	0.0537992					1.12332	0.0366177					1.12332	0.0286527					1.12332	0.0254404					1.12332	0.0234921					1.12332	0.0224888
						1.26186	0.0891158					1.26186	0.059546					1.26186	0.0410258					1.26186	0.0321714					1.26186	0.0285727					1.26186	0.0263867					1.26186	0.0252606
						1.41747	0.0955632					1.41747	0.0657998					1.41747	0.0459395					1.41747	0.036118					1.41747	0.0320892					1.41747	0.0296373					1.41747	0.0283734
						1.59228	0.102274					1.59228	0.072584					1.59228	0.0514087					1.59228	0.0405428					1.59228	0.0360362					1.59228	0.0332872					1.59228	0.0318692
						1.78865	0.109236					1.78865	0.079919					1.78865	0.0574857					1.78865	0.0455012					1.78865	0.0404658					1.78865	0.0373853					1.78865	0.0357946
						2.00923	0.116433					2.00923	0.0878211					2.00923	0.0642246					2.00923	0.0510544					2.00923	0.0454357					2.00923	0.0419857					2.00923	0.0402021
						2.25702	0.123846					2.25702	0.0963021					2.25702	0.0716807					2.25702	0.057269					2.25702	0.0510099					2.25702	0.0471493					2.25702	0.0451504
						2.53536	0.131452					2.53536	0.105368					2.53536	0.0799088					2.53536	0.0642174					2.53536	0.0572595					2.53536	0.0529437					2.53536	0.0507048
						2.84804	0.139227					2.84804	0.115017					2.84804	0.0889625					2.84804	0.0719775					2.84804	0.0642628					2.84804	0.0594443					2.84804	0.0569386
						3.19927	0.147142					3.19927	0.12524					3.19927	0.0988917					3.19927	0.0806323					3.19927	0.0721059					3.19927	0.0667347					3.19927	0.0639331
						3.59381	0.155164					3.59381	0.13602					3.59381	0.109741					3.59381	0.0902688					3.59381	0.0808825					3.59381	0.0749073					3.59381	0.0717788
						4.03702	0.163259					4.03702	0.14733					4.03702	0.121546					4.03702	0.100977					4.03702	0.0906942					4.03702	0.084064					4.03702	0.0805758
						4.53488	0.171389					4.53488	0.159131					4.53488	0.134332					4.53488	0.112846					4.53488	0.10165					4.53488	0.0943164					4.53488	0.0904349
						5.09414	0.179514					5.09414	0.171374					5.09414	0.14811					5.09414	0.125965					5.09414	0.113864					5.09414	0.105786					5.09414	0.101478
						5.72237	0.187591					5.72237	0.183997					5.72237	0.162874					5.72237	0.140415					5.72237	0.127455					5.72237	0.118603					5.72237	0.113836
						6.42807	0.195575					6.42807	0.196929					6.42807	0.178596					6.42807	0.156265					6.42807	0.142543					6.42807	0.132906					6.42807	0.127655
						7.22081	0.203418					7.22081	0.210084					7.22081	0.195223					7.22081	0.173567					7.22081	0.159245					7.22081	0.148841					7.22081	0.143086
						8.11131	0.211074					8.11131	0.223365					8.11131	0.212676					8.11131	0.19235					8.11131	0.177668					8.11131	0.166556					8.11131	0.160292
						9.11163	0.218493					9.11163	0.236665					9.11163	0.230842					9.11163	0.212604					9.11163	0.197899					9.11163	0.186196					9.11163	0.179439
						10.2353	0.225627					10.2353	0.249867					10.2353	0.24958					10.2353	0.234281					10.2353	0.22					10.2353	0.207897					10.2353	0.200693
						11.4976	0.232425					11.4976	0.262844					11.4976	0.26871					11.4976	0.257275					11.4976	0.243986					11.4976	0.231774					11.4976	0.224213
						12.9155	0.238841					12.9155	0.275463					12.9155	0.288022					12.9155	0.281419					12.9155	0.269814					12.9155	0.257903					12.9155	0.250135
						14.5083	0.244825					14.5083	0.287586					14.5083	0.307271					14.5083	0.306474					14.5083	0.297363					14.5083	0.286306					14.5083	0.278562
						16.2975	0.250335					16.2975	0.299071					16.2975	0.326185					16.2975	0.332122					16.2975	0.326412					16.2975	0.316922					16.2975	0.309534
						18.3074	0.255326					18.3074	0.309777					18.3074	0.344463					18.3074	0.357961					18.3074	0.356623					18.3074	0.349575					18.3074	0.343001
						20.5651	0.259758					20.5651	0.319566					20.5651	0.361789					20.5651	0.383509					20.5651	0.387517					20.5651	0.383939					20.5651	0.378785
						23.1013	0.263596					23.1013	0.328305					23.1013	0.377834					23.1013	0.408211					23.1013	0.418472					23.1013	0.419497					23.1013	0.416526
						25.9502	0.266806					25.9502	0.335868					25.9502	0.392271					25.9502	0.431449					25.9502	0.448709					25.9502	0.455507					25.9502	0.455627
						29.1505	0.269361					29.1505	0.342141					29.1505	0.404777					29.1505	0.452564					29.1505	0.477313					29.1505	0.490972					29.1505	0.495197
						32.7455	0.271237					32.7455	0.347027					32.7455	0.415055					32.7455	0.47088					32.7455	0.503256					32.7455	0.52463					32.7455	0.533987
						36.7838	0.272416					36.7838	0.35044					36.7838	0.422835					36.7838	0.485741					36.7838	0.52544					36.7838	0.554979					36.7838	0.570365
						41.3201	0.272885					41.3201	0.352318					41.3201	0.427893					41.3201	0.496543					41.3201	0.542769					41.3201	0.580337					41.3201	0.602319
						46.4159	0.272637					46.4159	0.352617					46.4159	0.430055					46.4159	0.50277					46.4159	0.554218					46.4159	0.59896					46.4159	0.627537
						52.1401	0.271671					52.1401	0.351315					52.1401	0.429211					52.1401	0.504035					52.1401	0.55893					52.1401	0.609197					52.1401	0.643586
						58.5702	0.269991					58.5702	0.348414					58.5702	0.425315					58.5702	0.500105					58.5702	0.556292					58.5702	0.609685					58.5702	0.648187
						65.7933	0.267607					65.7933	0.343937					65.7933	0.418395					65.7933	0.490925					65.7933	0.546018					65.7933	0.599557					65.7933	0.639595
						73.9072	0.264536					73.9072	0.337933					73.9072	0.408548					73.9072	0.476634					73.9072	0.528191					73.9072	0.578604					73.9072	0.616984
						83.0218	0.2608					83.0218	0.33047					83.0218	0.395941					83.0218	0.457559					83.0218	0.503289					83.0218	0.547388					83.0218	0.580764
						93.2603	0.256424					93.2603	0.321639					93.2603	0.380807					93.2603	0.434204					93.2603	0.472158					93.2603	0.507235					93.2603	0.532702
						104.762	0.251441					104.762	0.311547					104.762	0.363435					104.762	0.407226					104.762	0.435961					104.762	0.460131					104.762	0.475767
						117.681	0.245886					117.681	0.300321					117.681	0.344159					117.681	0.377397					117.681	0.396087					117.681	0.408502					117.681	0.413706
						132.194	0.239801					132.194	0.288098					132.194	0.323348					132.194	0.345563					132.194	0.354044					132.194	0.354949					132.194	0.350463
						148.497	0.233229					148.497	0.275027					148.497	0.301394					148.497	0.312595					148.497	0.311339					148.497	0.301956					148.497	0.289589
						166.81	0.226217					166.81	0.261265					166.81	0.278693					166.81	0.279344					166.81	0.269376					166.81	0.251654					166.81	0.233816
						187.382	0.218814					187.382	0.246972					187.382	0.25564					187.382	0.246601					187.382	0.229358					187.382	0.205653					187.382	0.184858
						210.49	0.211072					210.49	0.232307					210.49	0.232609					210.49	0.21506					210.49	0.192234					210.49	0.164977					210.49	0.143443
						236.449	0.203042					236.449	0.217431					236.449	0.209946					236.449	0.185295					236.449	0.158666					236.449	0.130088					236.449	0.109503
						265.609	0.194779					265.609	0.202495					265.609	0.187961					265.609	0.157743					265.609	0.129031					265.609	0.100972					265.609	0.0824292
						298.365	0.186334					298.365	0.187644					298.365	0.166917					298.365	0.132704					298.365	0.103448					298.365	0.0772637					298.365	0.0613158
						335.16	0.177761					335.16	0.173013					335.16	0.147031					335.16	0.110344					335.16	0.0818192					335.16	0.0583758					335.16	0.0451589
						376.494	0.169111					376.494	0.158722					376.494	0.12847					376.494	0.0907051					376.494	0.0638892					376.494	0.0436152					376.494	0.0329864
						422.924	0.160434					422.924	0.14488					422.924	0.111348					422.924	0.0737313					422.924	0.0492935					422.924	0.032272					422.924	0.0239324
						475.081	0.151777					475.081	0.13158					475.081	0.0957343					475.081	0.0592841					475.081	0.037611					475.081	0.0236808					475.081	0.0172678
						533.67	0.143186					533.67	0.118898					533.67	0.0816532					533.67	0.0471665					533.67	0.0284049					533.67	0.0172541					533.67	0.0124035
						599.484	0.134703					599.484	0.106897					599.484	0.069091					599.484	0.037145					599.484	0.021253					599.484	0.012497					599.484	0.00887727
						673.415	0.126368					673.415	0.0956223					673.415	0.0580012					673.415	0.0289675					673.415	0.0157685					673.415	0.0090068					673.415	0.00633505
						756.463	0.118215					756.463	0.0851046					756.463	0.0483115					756.463	0.0223798					756.463	0.0116117					756.463	0.00646482					756.463	0.00451032
						849.753	0.110277					849.753	0.0753614					849.753	0.0399297					849.753	0.0171369					849.753	0.00849397					849.753	0.00462471					849.753	0.00320519
						954.548	0.102582					954.548	0.0663967					954.548	0.03275					954.548	0.0130123					954.548	0.00617725					954.548	0.00329931					954.548	0.00227433
						1072.27	0.0951557					1072.27	0.0582034					1072.27	0.0266588					1072.27	0.00980254					1072.27	0.00446976					1072.27	0.00234853					1072.27	0.00161189
						1204.5	0.0880174					1204.5	0.0507641					1204.5	0.0215392					1204.5	0.00733016					1204.5	0.00322023					1204.5	0.00166874					1204.5	0.00114132
						1353.05	0.0811846					1353.05	0.0440528					1353.05	0.0172756					1353.05	0.00544391					1353.05	0.00231145					1353.05	0.00118401					1353.05	0.000807515
						1519.91	0.0746703					1519.91	0.0380367					1519.91	0.0137564					1519.91	0.00401758					1519.91	0.00165396					1519.91	0.000839108					1519.91	0.000570998
						1707.35	0.0684841					1707.35	0.0326776					1707.35	0.010877					1707.35	0.00294786					1707.35	0.0011804					1707.35	0.000594124					1707.35	0.000403564
						1917.91	0.0626324					1917.91	0.0279331					1917.91	0.00854104					1917.91	0.00215164					1917.91	0.000840605					1917.91	0.000420353					1917.91	0.000285119
						2154.43	0.0571181					2154.43	0.0237584					2154.43	0.00666164					2154.43	0.00156308					2154.43	0.000597551					2154.43	0.000297231					2154.43	0.000201377
						2420.13	0.0519413					2420.13	0.0201072					2420.13	0.00516174					2420.13	0.00113072					2420.13	0.000424149					2420.13	0.000210073					2420.13	0.000142197
						2718.59	0.0470993					2718.59	0.0169327					2718.59	0.00397408					2718.59	0.000814891					2718.59	0.000300705					2718.59	0.000148417					2718.59	0.000100389
						3053.86	0.042587					3053.86	0.0141891					3053.86	0.0030408					3053.86	0.000585346					3053.86	0.000212981					3053.86	0.000104825					3053.86	7.08633e-05
						3430.47	0.0383972					3430.47	0.0118316					3430.47	0.00231281					3430.47	0.000419253					3430.47	0.000150729					3430.47	7.40195e-05					3430.47	5.00153e-05
						3853.53	0.0345207					3853.53	0.00981751					3853.53	0.00174899					3853.53	0.000299542					3853.53	0.000106605					3853.53	5.2257e-05					3853.53	3.52975e-05
						4328.76	0.0309467					4328.76	0.00810667					4328.76	0.00131531					4328.76	0.000213556					4328.76	7.53591e-05					4328.76	3.68874e-05					4328.76	2.49088e-05
						4862.6	0.0276632					4862.6	0.00666158					4862.6	0.000983931					4862.6	0.000151975					4862.6	5.32497e-05					4862.6	2.60351e-05					4862.6	1.75766e-05
						5462.28	0.0246569					5462.28	0.00544777					5462.28	0.000732324					5462.28	0.000107985					5462.28	3.76145e-05					5462.28	1.83739e-05					5462.28	1.24022e-05
						6135.91	0.0219139					6135.91	0.00443385					6135.91	0.000542441					6135.91	7.66288e-05					6135.91	2.65632e-05					6135.91	1.29661e-05					6135.91	8.75074e-06
						6892.61	0.0194195					6892.61	0.00359153					6892.61	0.000399966					6892.61	5.43189e-05					6892.61	1.87549e-05					6892.61	9.14941e-06					6892.61	6.17417e-06
						7742.64	0.0171589					7742.64	0.00289553					7742.64	0.00029365					7742.64	3.84699e-05					7742.64	1.32397e-05					7742.64	6.45588e-06					7742.64	4.35614e-06
						8697.49	0.0151168					8697.49	0.00232352					8697.49	0.000214727					8697.49	2.72251e-05					8697.49	9.3451e-06					8697.49	4.55515e-06					8697.49	3.07339e-06
						9770.1	0.0132783					9770.1	0.00185588					9770.1	0.000156426					9770.1	1.92555e-05					9770.1	6.59545e-06					9770.1	3.21393e-06					9770.1	2.16834e-06
						10975	0.0116283					10975	0.00147556					10975	0.000113557					10975	1.36121e-05					10975	4.65445e-06					10975	2.26756e-06					10975	1.52979e-06
						12328.5	0.0101523					12328.5	0.00116786					12328.5	8.21694e-05					12328.5	9.61881e-06					12328.5	3.28445e-06					12328.5	1.59984e-06					12328.5	1.07927e-06
						13848.9	0.00883606					13848.9	0.000920174					13848.9	5.92811e-05					13848.9	6.79479e-06					13848.9	2.31758e-06					13848.9	1.12872e-06					13848.9	7.61426e-07
						15556.8	0.00766586					15556.8	0.000721798					15556.8	4.26521e-05					15556.8	4.79862e-06					15556.8	1.63527e-06					15556.8	7.96322e-07					15556.8	5.37183e-07
						17475.3	0.00662867					17475.3	0.000563702					17475.3	3.06119e-05					17475.3	3.38817e-06					17475.3	1.1538e-06					17475.3	5.61809e-07					17475.3	3.78979e-07
						19630.4	0.00571209					19630.4	0.000438325					19630.4	2.19213e-05					19630.4	2.39188e-06					19630.4	8.14062e-07					19630.4	3.96356e-07					19630.4	2.67366e-07
						22051.3	0.00490445					22051.3	0.000339371					22051.3	1.56664e-05					22051.3	1.68832e-06					22051.3	5.7435e-07					22051.3	2.79628e-07					22051.3	1.88623e-07
						24770.8	0.00419482					24770.8	0.000261644					24770.8	1.11762e-05					24770.8	1.19158e-06					24770.8	4.05218e-07					24770.8	1.97275e-07					24770.8	1.33071e-07
						27825.6	0.00357305					27825.6	0.000200873					27825.6	7.9602e-06					27825.6	8.4092e-07					27825.6	2.85888e-07					27825.6	1.39176e-07					27825.6	9.38797e-08
						31257.2	0.0030298					31257.2	0.000153578					31257.2	5.66165e-06					31257.2	5.93411e-07					31257.2	2.01696e-07					31257.2	9.81868e-08					31257.2	6.62306e-08
						35111.9	0.0025565					35111.9	0.000116935					35111.9	4.02185e-06					35111.9	4.18729e-07					35111.9	1.42297e-07					35111.9	6.92695e-08					35111.9	4.67246e-08
						39442.1	0.00214537					39442.1	8.86703e-05					39442.1	2.85392e-06					39442.1	2.95455e-07					39442.1	1.0039e-07					39442.1	4.88686e-08					39442.1	3.29634e-08
						44306.2	0.00178942					44306.2	6.69633e-05					44306.2	2.02327e-06					44306.2	2.08465e-07					44306.2	7.08248e-08					44306.2	3.4476e-08					44306.2	2.32551e-08
						49770.2	0.00148239					49770.2	5.03635e-05					49770.2	1.43324e-06					49770.2	1.47084e-07					49770.2	4.99663e-08					49770.2	2.43222e-08					49770.2	1.6406e-08
						55908.1	0.00121874					55908.1	3.7723e-05					55908.1	1.01457e-06					55908.1	1.03773e-07					55908.1	3.52507e-08					55908.1	1.71589e-08					55908.1	1.15742e-08
						62802.9	0.000993556					62802.9	2.81376e-05					62802.9	7.17789e-07					62802.9	7.32149e-08					62802.9	2.48689e-08					62802.9	1.21053e-08					62802.9	8.16535e-09
						70548	0.000802511					70548	2.08997e-05					70548	5.07569e-07					70548	5.16544e-08					70548	1.75446e-08					70548	8.54008e-09					70548	5.7605e-09
						79248.3	0.000641735					79248.3	1.54575e-05					79248.3	3.58768e-07					79248.3	3.64427e-08					79248.3	1.23775e-08					79248.3	6.02487e-09					79248.3	4.06392e-09
						89021.5	0.000507736					89021.5	1.13834e-05					89021.5	2.53502e-07					89021.5	2.57105e-08					89021.5	8.73211e-09					89021.5	4.25043e-09					89021.5	2.86702e-09
						100000	0.000397299					100000	8.34717e-06					100000	1.7907e-07					100000	1.81387e-08					100000	6.16035e-09					100000	2.9986e-09					100000	2.02263e-09
