# Supplementary material for: Characterization of fine particles using optomagnetic measurements
Source: Royal Society of Chemistry journal article supplement (doi:10.1039/c6cp08749c), 2017-01-01
Supplement: c6cp08749c2.zip [file fig4.xls]

## Sheet: 4left
$\sigma_{f_B}$	fit f_peak/f_zero		$\sigma_{f_B}$
0	1.0123		0.05	0.982775
0.020202	1.00505		0.3	0.873947
0.040404	0.997443		0.5	0.705813
0.0606061	0.989473		0.7	0.529928
0.0808081	0.981128		1	0.303295
0.10101	0.972399		1.4	0.108301
0.121212	0.963277		2	0.0138066
0.141414	0.953753
0.161616	0.943821
0.181818	0.933473
0.20202	0.922706
0.222222	0.911514
0.242424	0.899896
0.262626	0.887851
0.282828	0.875379
0.30303	0.862484
0.323232	0.849168
0.343434	0.835439
0.363636	0.821306
0.383838	0.806778
0.40404	0.791869
0.424242	0.776592
0.444444	0.760967
0.464646	0.745011
0.484848	0.728747
0.505051	0.712198
0.525253	0.695388
0.545455	0.678347
0.565657	0.661102
0.585859	0.643685
0.606061	0.626126
0.626263	0.608459
0.646465	0.590717
0.666667	0.572935
0.686869	0.555148
0.707071	0.537389
0.727273	0.519694
0.747475	0.502096
0.767677	0.484628
0.787879	0.467323
0.808081	0.450211
0.828283	0.433322
0.848485	0.416684
0.868687	0.400323
0.888889	0.384263
0.909091	0.368526
0.929293	0.353133
0.949495	0.338101
0.969697	0.323445
0.989899	0.30918
1.0101	0.295317
1.0303	0.281864
1.05051	0.268829
1.07071	0.256217
1.09091	0.244031
1.11111	0.232272
1.13131	0.22094
1.15152	0.210033
1.17172	0.199548
1.19192	0.189479
1.21212	0.179821
1.23232	0.170568
1.25253	0.16171
1.27273	0.153239
1.29293	0.145147
1.31313	0.137422
1.33333	0.130054
1.35354	0.123033
1.37374	0.116348
1.39394	0.109986
1.41414	0.103937
1.43434	0.098189
1.45455	0.0927304
1.47475	0.0875497
1.49495	0.0826356
1.51515	0.0779769
1.53535	0.0735626
1.55556	0.0693818
1.57576	0.0654241
1.59596	0.0616791
1.61616	0.0581369
1.63636	0.0547878
1.65657	0.0516224
1.67677	0.0486317
1.69697	0.045807
1.71717	0.0431398
1.73737	0.0406222
1.75758	0.0382464
1.77778	0.036005
1.79798	0.0338909
1.81818	0.0318973
1.83838	0.0300179
1.85859	0.0282463
1.87879	0.0265768
1.89899	0.0250038
1.91919	0.0235219
1.93939	0.0221261
1.9596	0.0208115
1.9798	0.0195737
2	0.0184083

## Sheet: 4right
$\sigma_{f_B}$	fit max/min		$\sigma_{f_B}$
0	0.130089		0.05	0.123842
0.020202	0.128587		0.3	0.103024
0.040404	0.127029		0.5	0.0775975
0.0606061	0.125414		0.7	0.0538392
0.0808081	0.123743		1	0.0284429
0.10101	0.122015		1.4	0.0108287
0.121212	0.120232		2	0.00235514
0.141414	0.118394
0.161616	0.116501
0.181818	0.114555
0.20202	0.112557
0.222222	0.11051
0.242424	0.108415
0.262626	0.106274
0.282828	0.10409
0.30303	0.101866
0.323232	0.0996049
0.343434	0.0973099
0.363636	0.0949846
0.383838	0.0926328
0.40404	0.0902584
0.424242	0.0878654
0.444444	0.0854582
0.464646	0.083041
0.484848	0.0806182
0.505051	0.0781942
0.525253	0.0757736
0.545455	0.0733608
0.565657	0.07096
0.585859	0.0685756
0.606061	0.0662117
0.626263	0.0638724
0.646465	0.0615616
0.666667	0.0592827
0.686869	0.0570393
0.707071	0.0548346
0.727273	0.0526716
0.747475	0.0505528
0.767677	0.0484808
0.787879	0.0464576
0.808081	0.0444852
0.828283	0.0425651
0.848485	0.0406987
0.868687	0.0388871
0.888889	0.037131
0.909091	0.035431
0.929293	0.0337874
0.949495	0.0322004
0.969697	0.0306698
0.989899	0.0291953
1.0101	0.0277765
1.0303	0.0264127
1.05051	0.0251032
1.07071	0.023847
1.09091	0.0226431
1.11111	0.0214904
1.13131	0.0203877
1.15152	0.0193336
1.17172	0.0183269
1.19192	0.0173662
1.21212	0.0164499
1.23232	0.0155767
1.25253	0.0147451
1.27273	0.0139537
1.29293	0.0132008
1.31313	0.0124851
1.33333	0.0118051
1.35354	0.0111593
1.37374	0.0105463
1.39394	0.00996473
1.41414	0.00941322
1.43434	0.00889043
1.45455	0.00839505
1.47475	0.00792582
1.49495	0.00748153
1.51515	0.00706099
1.53535	0.00666305
1.55556	0.00628662
1.57576	0.00593063
1.59596	0.00559407
1.61616	0.00527595
1.63636	0.00497534
1.65657	0.00469134
1.67677	0.00442308
1.69697	0.00416976
1.71717	0.00393058
1.73737	0.00370479
1.75758	0.00349168
1.77778	0.00329057
1.79798	0.00310081
1.81818	0.0029218
1.83838	0.00275293
1.85859	0.00259367
1.87879	0.00244347
1.89899	0.00230185
1.91919	0.00216832
1.93939	0.00204244
1.9596	0.00192378
1.9798	0.00181193
2	0.00170651
