# Supplementary material for: Characterization of fine particles using optomagnetic measurements
Source: Royal Society of Chemistry journal article supplement (doi:10.1039/c6cp08749c), 2017-01-01
Supplement: c6cp08749c2.zip [file fig5.xls]

## Sheet: 5c
$m$ [aJ/T]			$m$ [aJ/T]	M80, p(m)		$m$ [aJ/T]			$m$ [aJ/T]	M100, p(m)
6.14099	0		0	0		13.0972	0		0	0
6.14099	0.2		0.040008	2.96783e-15		13.0972	0.2		0.040008	6.66881e-19
			0.080016	2.19065e-11					0.080016	1.04123e-14
			0.120024	2.02838e-09					0.120024	1.57197e-12
			0.160032	3.71443e-08					0.160032	4.1656e-11
			0.20004	2.97559e-07					0.20004	4.50269e-10
			0.240048	1.45475e-06					0.240048	2.83562e-09
			0.280056	5.14079e-06					0.280056	1.24859e-08
			0.320064	1.44677e-05					0.320064	4.27013e-08
			0.360072	3.44424e-05					0.360072	1.21133e-07
			0.40008	7.21819e-05					0.40008	2.97755e-07
			0.440088	0.000136898					0.440088	6.53768e-07
			0.480096	0.00023967					0.480096	1.31064e-06
			0.520104	0.000393064					0.520104	2.43851e-06
			0.560112	0.000610644					0.560112	4.26327e-06
			0.60012	0.000906449					0.60012	7.07193e-06
			0.640128	0.00129448					0.640128	1.1216e-05
			0.680136	0.0017882					0.680136	1.71129e-05
			0.720144	0.00240015					0.720144	2.52449e-05
			0.760152	0.00314159					0.760152	3.61569e-05
			0.80016	0.00402227					0.80016	5.0452e-05
			0.840168	0.00505019					0.840168	6.8786e-05
			0.880176	0.00623159					0.880176	9.18605e-05
			0.920184	0.00757082					0.920184	0.000120416
			0.960192	0.0090704					0.960192	0.000155223
			1.0002	0.0107311					1.0002	0.000197074
			1.04021	0.0125518					1.04021	0.000246778
			1.08022	0.0145302					1.08022	0.000305146
			1.12022	0.0166622					1.12022	0.00037299
			1.16023	0.0189427					1.16023	0.000451112
			1.20024	0.0213651					1.20024	0.000540295
			1.24025	0.0239222					1.24025	0.000641302
			1.28026	0.0266057					1.28026	0.000754867
			1.32026	0.029407					1.32026	0.000881688
			1.36027	0.0323165					1.36027	0.00102243
			1.40028	0.0353245					1.40028	0.0011777
			1.44029	0.038421					1.44029	0.00134808
			1.4803	0.0415958					1.4803	0.0015341
			1.5203	0.0448386					1.5203	0.00173623
			1.56031	0.0481391					1.56031	0.00195488
			1.60032	0.0514873					1.60032	0.00219044
			1.64033	0.0548732					1.64033	0.00244322
			1.68034	0.0582871					1.68034	0.00271349
			1.72034	0.0617194					1.72034	0.00300144
			1.76035	0.0651613					1.76035	0.00330725
			1.80036	0.0686038					1.80036	0.00363102
			1.84037	0.0720388					1.84037	0.00397281
			1.88038	0.0754581					1.88038	0.00433262
			1.92038	0.0788544					1.92038	0.00471041
			1.96039	0.0822206					1.96039	0.00510611
			2.0004	0.08555					2.0004	0.00551958
			2.04041	0.0888365					2.04041	0.00595066
			2.08042	0.0920744					2.08042	0.00639913
			2.12042	0.0952583					2.12042	0.00686474
			2.16043	0.0983834					2.16043	0.00734723
			2.20044	0.101445					2.20044	0.00784628
			2.24045	0.10444					2.24045	0.00836153
			2.28046	0.107363					2.28046	0.00889263
			2.32046	0.110213					2.32046	0.00943917
			2.36047	0.112986					2.36047	0.0100007
			2.40048	0.115678					2.40048	0.0105769
			2.44049	0.11829					2.44049	0.0111671
			2.4805	0.120817					2.4805	0.011771
			2.5205	0.12326					2.5205	0.012388
			2.56051	0.125616					2.56051	0.0130177
			2.60052	0.127884					2.60052	0.0136595
			2.64053	0.130065					2.64053	0.0143128
			2.68054	0.132156					2.68054	0.0149772
			2.72054	0.134159					2.72054	0.0156521
			2.76055	0.136073					2.76055	0.016337
			2.80056	0.137898					2.80056	0.0170312
			2.84057	0.139634					2.84057	0.0177343
			2.88058	0.141282					2.88058	0.0184456
			2.92058	0.142843					2.92058	0.0191647
			2.96059	0.144317					2.96059	0.0198909
			3.0006	0.145705					3.0006	0.0206237
			3.04061	0.147008					3.04061	0.0213626
			3.08062	0.148228					3.08062	0.022107
			3.12062	0.149365					3.12062	0.0228564
			3.16063	0.150421					3.16063	0.0236102
			3.20064	0.151397					3.20064	0.0243679
			3.24065	0.152295					3.24065	0.0251291
			3.28066	0.153116					3.28066	0.025893
			3.32066	0.153862					3.32066	0.0266594
			3.36067	0.154534					3.36067	0.0274276
			3.40068	0.155134					3.40068	0.0281973
			3.44069	0.155664					3.44069	0.0289678
			3.4807	0.156125					3.4807	0.0297388
			3.5207	0.156519					3.5207	0.0305098
			3.56071	0.156848					3.56071	0.0312803
			3.60072	0.157114					3.60072	0.03205
			3.64073	0.157318					3.64073	0.0328183
			3.68074	0.157462					3.68074	0.0335849
			3.72074	0.157548					3.72074	0.0343495
			3.76075	0.157578					3.76075	0.0351115
			3.80076	0.157553					3.80076	0.0358706
			3.84077	0.157476					3.84077	0.0366265
			3.88078	0.157347					3.88078	0.0373789
			3.92078	0.157168					3.92078	0.0381273
			3.96079	0.156942					3.96079	0.0388714
			4.0008	0.15667					4.0008	0.039611
			4.04081	0.156353					4.04081	0.0403456
			4.08082	0.155993					4.08082	0.0410751
			4.12082	0.155593					4.12082	0.0417992
			4.16083	0.155152					4.16083	0.0425175
			4.20084	0.154673					4.20084	0.0432299
			4.24085	0.154158					4.24085	0.043936
			4.28086	0.153608					4.28086	0.0446357
			4.32086	0.153024					4.32086	0.0453286
			4.36087	0.152407					4.36087	0.0460147
			4.40088	0.15176					4.40088	0.0466936
			4.44089	0.151083					4.44089	0.0473653
			4.4809	0.150379					4.4809	0.0480294
			4.5209	0.149647					4.5209	0.0486859
			4.56091	0.14889					4.56091	0.0493345
			4.60092	0.148108					4.60092	0.0499752
			4.64093	0.147303					4.64093	0.0506077
			4.68094	0.146476					4.68094	0.0512319
			4.72094	0.145629					4.72094	0.0518478
			4.76095	0.144762					4.76095	0.0524551
			4.80096	0.143876					4.80096	0.0530538
			4.84097	0.142972					4.84097	0.0536438
			4.88098	0.142052					4.88098	0.0542249
			4.92098	0.141117					4.92098	0.0547971
			4.96099	0.140167					4.96099	0.0553603
			5.001	0.139203					5.001	0.0559144
			5.04101	0.138226					5.04101	0.0564594
			5.08102	0.137238					5.08102	0.0569952
			5.12102	0.136238					5.12102	0.0575218
			5.16103	0.135229					5.16103	0.058039
			5.20104	0.13421					5.20104	0.058547
			5.24105	0.133182					5.24105	0.0590455
			5.28106	0.132146					5.28106	0.0595347
			5.32106	0.131104					5.32106	0.0600145
			5.36107	0.130054					5.36107	0.0604848
			5.40108	0.128999					5.40108	0.0609457
			5.44109	0.127939					5.44109	0.0613972
			5.4811	0.126874					5.4811	0.0618392
			5.5211	0.125806					5.5211	0.0622718
			5.56111	0.124734					5.56111	0.062695
			5.60112	0.123659					5.60112	0.0631087
			5.64113	0.122582					5.64113	0.0635131
			5.68114	0.121503					5.68114	0.063908
			5.72114	0.120423					5.72114	0.0642937
			5.76115	0.119342					5.76115	0.06467
			5.80116	0.118261					5.80116	0.065037
			5.84117	0.117179					5.84117	0.0653948
			5.88118	0.116099					5.88118	0.0657434
			5.92118	0.115019					5.92118	0.0660828
			5.96119	0.113941					5.96119	0.0664131
			6.0012	0.112864					6.0012	0.0667343
			6.04121	0.11179					6.04121	0.0670465
			6.08122	0.110718					6.08122	0.0673498
			6.12122	0.109648					6.12122	0.0676441
			6.16123	0.108582					6.16123	0.0679296
			6.20124	0.107519					6.20124	0.0682064
			6.24125	0.10646					6.24125	0.0684744
			6.28126	0.105404					6.28126	0.0687338
			6.32126	0.104353					6.32126	0.0689846
			6.36127	0.103306					6.36127	0.0692268
			6.40128	0.102264					6.40128	0.0694607
			6.44129	0.101226					6.44129	0.0696861
			6.4813	0.100194					6.4813	0.0699033
			6.5213	0.0991664					6.5213	0.0701123
			6.56131	0.0981447					6.56131	0.0703131
			6.60132	0.0971286					6.60132	0.0705059
			6.64133	0.0961182					6.64133	0.0706907
			6.68134	0.0951138					6.68134	0.0708676
			6.72134	0.0941155					6.72134	0.0710367
			6.76135	0.0931235					6.76135	0.071198
			6.80136	0.0921378					6.80136	0.0713517
			6.84137	0.0911586					6.84137	0.0714978
			6.88138	0.090186					6.88138	0.0716365
			6.92138	0.0892202					6.92138	0.0717678
			6.96139	0.0882611					6.96139	0.0718917
			7.0014	0.087309					7.0014	0.0720085
			7.04141	0.0863639					7.04141	0.0721181
			7.08142	0.0854258					7.08142	0.0722206
			7.12142	0.0844949					7.12142	0.0723162
			7.16143	0.0835712					7.16143	0.0724049
			7.20144	0.0826549					7.20144	0.0724869
			7.24145	0.0817458					7.24145	0.0725622
			7.28146	0.0808441					7.28146	0.0726308
			7.32146	0.0799499					7.32146	0.072693
			7.36147	0.0790632					7.36147	0.0727487
			7.40148	0.0781839					7.40148	0.0727981
			7.44149	0.0773122					7.44149	0.0728412
			7.4815	0.0764481					7.4815	0.0728782
			7.5215	0.0755915					7.5215	0.072909
			7.56151	0.0747426					7.56151	0.072934
			7.60152	0.0739013					7.60152	0.072953
			7.64153	0.0730676					7.64153	0.0729662
			7.68154	0.0722415					7.68154	0.0729737
			7.72154	0.0714231					7.72154	0.0729755
			7.76155	0.0706124					7.76155	0.0729718
			7.80156	0.0698092					7.80156	0.0729627
			7.84157	0.0690137					7.84157	0.0729481
			7.88158	0.0682259					7.88158	0.0729283
			7.92158	0.0674456					7.92158	0.0729033
			7.96159	0.0666729					7.96159	0.0728731
			8.0016	0.0659078					8.0016	0.072838
			8.04161	0.0651503					8.04161	0.0727978
			8.08162	0.0644003					8.08162	0.0727528
			8.12162	0.0636578					8.12162	0.072703
			8.16163	0.0629228					8.16163	0.0726485
			8.20164	0.0621952					8.20164	0.0725894
			8.24165	0.0614751					8.24165	0.0725257
			8.28166	0.0607623					8.28166	0.0724576
			8.32166	0.0600569					8.32166	0.0723851
			8.36167	0.0593589					8.36167	0.0723083
			8.40168	0.0586681					8.40168	0.0722272
			8.44169	0.0579845					8.44169	0.072142
			8.4817	0.0573082					8.4817	0.0720527
			8.5217	0.0566391					8.5217	0.0719595
			8.56171	0.055977					8.56171	0.0718623
			8.60172	0.0553221					8.60172	0.0717612
			8.64173	0.0546742					8.64173	0.0716564
			8.68174	0.0540332					8.68174	0.0715479
			8.72174	0.0533993					8.72174	0.0714357
			8.76175	0.0527722					8.76175	0.07132
			8.80176	0.0521519					8.80176	0.0712009
			8.84177	0.0515385					8.84177	0.0710783
			8.88178	0.0509318					8.88178	0.0709523
			8.92178	0.0503318					8.92178	0.0708231
			8.96179	0.0497385					8.96179	0.0706907
			9.0018	0.0491518					9.0018	0.0705551
			9.04181	0.0485716					9.04181	0.0704165
			9.08182	0.0479979					9.08182	0.0702748
			9.12182	0.0474306					9.12182	0.0701302
			9.16183	0.0468698					9.16183	0.0699827
			9.20184	0.0463152					9.20184	0.0698325
			9.24185	0.045767					9.24185	0.0696794
			9.28186	0.045225					9.28186	0.0695237
			9.32186	0.0446891					9.32186	0.0693653
			9.36187	0.0441594					9.36187	0.0692044
			9.40188	0.0436357					9.40188	0.069041
			9.44189	0.0431181					9.44189	0.0688751
			9.4819	0.0426064					9.4819	0.0687068
			9.5219	0.0421006					9.5219	0.0685362
			9.56191	0.0416006					9.56191	0.0683633
			9.60192	0.0411064					9.60192	0.0681882
			9.64193	0.040618					9.64193	0.0680109
			9.68194	0.0401352					9.68194	0.0678315
			9.72194	0.0396581					9.72194	0.0676501
			9.76195	0.0391865					9.76195	0.0674666
			9.80196	0.0387205					9.80196	0.0672812
			9.84197	0.0382599					9.84197	0.0670939
			9.88198	0.0378047					9.88198	0.0669048
			9.92198	0.0373549					9.92198	0.0667138
			9.96199	0.0369103					9.96199	0.0665211
			10.002	0.036471					10.002	0.0663267
			10.042	0.0360369					10.042	0.0661307
			10.082	0.035608					10.082	0.065933
			10.122	0.0351841					10.122	0.0657338
			10.162	0.0347652					10.162	0.0655331
			10.202	0.0343513					10.202	0.0653309
			10.242	0.0339424					10.242	0.0651273
			10.2821	0.0335383					10.2821	0.0649223
			10.3221	0.033139					10.3221	0.064716
			10.3621	0.0327445					10.3621	0.0645084
			10.4021	0.0323547					10.4021	0.0642995
			10.4421	0.0319696					10.4421	0.0640894
			10.4821	0.0315891					10.4821	0.0638782
			10.5221	0.0312131					10.5221	0.0636658
			10.5621	0.0308417					10.5621	0.0634524
			10.6021	0.0304747					10.6021	0.0632379
			10.6421	0.0301122					10.6421	0.0630224
			10.6821	0.029754					10.6821	0.0628059
			10.7221	0.0294001					10.7221	0.0625885
			10.7622	0.0290505					10.7622	0.0623702
			10.8022	0.0287051					10.8022	0.062151
			10.8422	0.0283639					10.8422	0.061931
			10.8822	0.0280268					10.8822	0.0617102
			10.9222	0.0276938					10.9222	0.0614886
			10.9622	0.0273648					10.9622	0.0612664
			11.0022	0.0270398					11.0022	0.0610434
			11.0422	0.0267188					11.0422	0.0608198
			11.0822	0.0264016					11.0822	0.0605955
			11.1222	0.0260883					11.1222	0.0603706
			11.1622	0.0257788					11.1622	0.0601452
			11.2022	0.025473					11.2022	0.0599193
			11.2422	0.025171					11.2422	0.0596928
			11.2823	0.0248726					11.2823	0.0594659
			11.3223	0.0245779					11.3223	0.0592385
			11.3623	0.0242867					11.3623	0.0590107
			11.4023	0.0239991					11.4023	0.0587825
			11.4423	0.023715					11.4423	0.058554
			11.4823	0.0234344					11.4823	0.0583251
			11.5223	0.0231571					11.5223	0.0580959
			11.5623	0.0228833					11.5623	0.0578664
			11.6023	0.0226128					11.6023	0.0576367
			11.6423	0.0223456					11.6423	0.0574067
			11.6823	0.0220817					11.6823	0.0571766
			11.7223	0.0218209					11.7223	0.0569462
			11.7624	0.0215634					11.7624	0.0567157
			11.8024	0.021309					11.8024	0.056485
			11.8424	0.0210577					11.8424	0.0562543
			11.8824	0.0208095					11.8824	0.0560234
			11.9224	0.0205643					11.9224	0.0557925
			11.9624	0.0203222					11.9624	0.0555615
			12.0024	0.0200829					12.0024	0.0553305
			12.0424	0.0198466					12.0424	0.0550994
			12.0824	0.0196132					12.0824	0.0548684
			12.1224	0.0193827					12.1224	0.0546374
			12.1624	0.0191549					12.1624	0.0544065
			12.2024	0.01893					12.2024	0.0541757
			12.2424	0.0187078					12.2424	0.0539449
			12.2825	0.0184883					12.2825	0.0537142
			12.3225	0.0182715					12.3225	0.0534837
			12.3625	0.0180573					12.3625	0.0532533
			12.4025	0.0178458					12.4025	0.0530231
			12.4425	0.0176369					12.4425	0.052793
			12.4825	0.0174305					12.4825	0.0525632
			12.5225	0.0172266					12.5225	0.0523335
			12.5625	0.0170252					12.5625	0.0521041
			12.6025	0.0168263					12.6025	0.0518749
			12.6425	0.0166298					12.6425	0.051646
			12.6825	0.0164357					12.6825	0.0514174
			12.7225	0.016244					12.7225	0.051189
			12.7626	0.0160547					12.7626	0.050961
			12.8026	0.0158676					12.8026	0.0507332
			12.8426	0.0156828					12.8426	0.0505058
			12.8826	0.0155003					12.8826	0.0502787
			12.9226	0.01532					12.9226	0.050052
			12.9626	0.015142					12.9626	0.0498256
			13.0026	0.0149661					13.0026	0.0495996
			13.0426	0.0147923					13.0426	0.0493741
			13.0826	0.0146206					13.0826	0.0491489
			13.1226	0.0144511					13.1226	0.0489241
			13.1626	0.0142836					13.1626	0.0486998
			13.2026	0.0141182					13.2026	0.0484759
			13.2426	0.0139547					13.2426	0.0482524
			13.2827	0.0137933					13.2827	0.0480294
			13.3227	0.0136338					13.3227	0.0478069
			13.3627	0.0134763					13.3627	0.0475848
			13.4027	0.0133207					13.4027	0.0473633
			13.4427	0.013167					13.4427	0.0471422
			13.4827	0.0130152					13.4827	0.0469217
			13.5227	0.0128652					13.5227	0.0467016
			13.5627	0.012717					13.5627	0.0464821
			13.6027	0.0125706					13.6027	0.0462631
			13.6427	0.012426					13.6427	0.0460447
			13.6827	0.0122832					13.6827	0.0458268
			13.7227	0.0121421					13.7227	0.0456095
			13.7628	0.0120027					13.7628	0.0453927
			13.8028	0.011865					13.8028	0.0451766
			13.8428	0.011729					13.8428	0.044961
			13.8828	0.0115946					13.8828	0.044746
			13.9228	0.0114618					13.9228	0.0445315
			13.9628	0.0113307					13.9628	0.0443177
			14.0028	0.0112011					14.0028	0.0441045
			14.0428	0.0110732					14.0428	0.0438919
			14.0828	0.0109467					14.0828	0.04368
			14.1228	0.0108218					14.1228	0.0434686
			14.1628	0.0106984					14.1628	0.0432579
			14.2028	0.0105765					14.2028	0.0430479
			14.2428	0.0104561					14.2428	0.0428384
			14.2829	0.0103371					14.2829	0.0426297
			14.3229	0.0102196					14.3229	0.0424216
			14.3629	0.0101034					14.3629	0.0422141
			14.4029	0.0099887					14.4029	0.0420073
			14.4429	0.00987536					14.4429	0.0418012
			14.4829	0.00976338					14.4829	0.0415957
			14.5229	0.00965275					14.5229	0.041391
			14.5629	0.00954345					14.5629	0.0411869
			14.6029	0.00943547					14.6029	0.0409835
			14.6429	0.00932878					14.6429	0.0407808
			14.6829	0.00922338					14.6829	0.0405788
			14.7229	0.00911924					14.7229	0.0403774
			14.763	0.00901635					14.763	0.0401768
			14.803	0.0089147					14.803	0.0399769
			14.843	0.00881427					14.843	0.0397777
			14.883	0.00871504					14.883	0.0395792
			14.923	0.00861699					14.923	0.0393814
			14.963	0.00852013					14.963	0.0391844
			15.003	0.00842442					15.003	0.038988
			15.043	0.00832985					15.043	0.0387924
			15.083	0.00823642					15.083	0.0385975
			15.123	0.0081441					15.123	0.0384034
			15.163	0.00805289					15.163	0.0382099
			15.203	0.00796276					15.203	0.0380172
			15.243	0.00787371					15.243	0.0378252
			15.2831	0.00778572					15.2831	0.037634
			15.3231	0.00769877					15.3231	0.0374435
			15.3631	0.00761287					15.3631	0.0372537
			15.4031	0.00752798					15.4031	0.0370647
			15.4431	0.0074441					15.4431	0.0368764
			15.4831	0.00736123					15.4831	0.0366889
			15.5231	0.00727933					15.5231	0.0365021
			15.5631	0.00719841					15.5631	0.036316
			15.6031	0.00711845					15.6031	0.0361307
			15.6431	0.00703943					15.6431	0.0359462
			15.6831	0.00696135					15.6831	0.0357624
			15.7231	0.0068842					15.7231	0.0355793
			15.7632	0.00680796					15.7632	0.035397
			15.8032	0.00673262					15.8032	0.0352154
			15.8432	0.00665818					15.8432	0.0350346
			15.8832	0.00658461					15.8832	0.0348546
			15.9232	0.00651191					15.9232	0.0346753
			15.9632	0.00644007					15.9632	0.0344967
			16.0032	0.00636907					16.0032	0.0343189
			16.0432	0.00629891					16.0432	0.0341419
			16.0832	0.00622958					16.0832	0.0339656
			16.1232	0.00616106					16.1232	0.03379
			16.1632	0.00609335					16.1632	0.0336152
			16.2032	0.00602644					16.2032	0.0334412
			16.2432	0.00596031					16.2432	0.0332679
			16.2833	0.00589496					16.2833	0.0330954
			16.3233	0.00583037					16.3233	0.0329236
			16.3633	0.00576655					16.3633	0.0327526
			16.4033	0.00570347					16.4033	0.0325823
			16.4433	0.00564112					16.4433	0.0324128
			16.4833	0.00557951					16.4833	0.032244
			16.5233	0.00551862					16.5233	0.032076
			16.5633	0.00545844					16.5633	0.0319087
			16.6033	0.00539896					16.6033	0.0317422
			16.6433	0.00534018					16.6433	0.0315764
			16.6833	0.00528208					16.6833	0.0314114
			16.7233	0.00522466					16.7233	0.0312471
			16.7634	0.00516791					16.7634	0.0310836
			16.8034	0.00511182					16.8034	0.0309208
			16.8434	0.00505638					16.8434	0.0307587
			16.8834	0.00500158					16.8834	0.0305974
			16.9234	0.00494743					16.9234	0.0304369
			16.9634	0.0048939					16.9634	0.030277
			17.0034	0.00484099					17.0034	0.0301179
			17.0434	0.00478869					17.0434	0.0299596
			17.0834	0.004737					17.0834	0.029802
			17.1234	0.00468591					17.1234	0.0296451
			17.1634	0.00463541					17.1634	0.0294889
			17.2034	0.00458549					17.2034	0.0293335
			17.2434	0.00453615					17.2434	0.0291788
			17.2835	0.00448738					17.2835	0.0290249
			17.3235	0.00443917					17.3235	0.0288717
			17.3635	0.00439152					17.3635	0.0287192
			17.4035	0.00434442					17.4035	0.0285674
			17.4435	0.00429786					17.4435	0.0284163
			17.4835	0.00425183					17.4835	0.028266
			17.5235	0.00420633					17.5235	0.0281164
			17.5635	0.00416136					17.5635	0.0279675
			17.6035	0.0041169					17.6035	0.0278193
			17.6435	0.00407295					17.6435	0.0276718
			17.6835	0.00402951					17.6835	0.0275251
			17.7235	0.00398656					17.7235	0.027379
			17.7636	0.00394411					17.7636	0.0272337
			17.8036	0.00390214					17.8036	0.0270891
			17.8436	0.00386065					17.8436	0.0269451
			17.8836	0.00381963					17.8836	0.0268019
			17.9236	0.00377909					17.9236	0.0266594
			17.9636	0.003739					17.9636	0.0265176
			18.0036	0.00369937					18.0036	0.0263764
			18.0436	0.00366019					18.0436	0.026236
			18.0836	0.00362146					18.0836	0.0260963
			18.1236	0.00358317					18.1236	0.0259572
			18.1636	0.00354532					18.1636	0.0258189
			18.2036	0.00350789					18.2036	0.0256812
			18.2436	0.00347089					18.2436	0.0255442
			18.2837	0.00343431					18.2837	0.0254079
			18.3237	0.00339814					18.3237	0.0252723
			18.3637	0.00336238					18.3637	0.0251374
			18.4037	0.00332703					18.4037	0.0250031
			18.4437	0.00329208					18.4437	0.0248695
			18.4837	0.00325752					18.4837	0.0247366
			18.5237	0.00322335					18.5237	0.0246043
			18.5637	0.00318957					18.5637	0.0244727
			18.6037	0.00315616					18.6037	0.0243418
			18.6437	0.00312314					18.6437	0.0242115
			18.6837	0.00309048					18.6837	0.0240819
			18.7237	0.0030582					18.7237	0.023953
			18.7638	0.00302627					18.7638	0.0238247
			18.8038	0.00299471					18.8038	0.0236971
			18.8438	0.0029635					18.8438	0.0235701
			18.8838	0.00293264					18.8838	0.0234438
			18.9238	0.00290212					18.9238	0.0233181
			18.9638	0.00287195					18.9638	0.023193
			19.0038	0.00284211					19.0038	0.0230686
			19.0438	0.00281261					19.0438	0.0229449
			19.0838	0.00278344					19.0838	0.0228217
			19.1238	0.00275459					19.1238	0.0226992
			19.1638	0.00272606					19.1638	0.0225774
			19.2038	0.00269786					19.2038	0.0224561
			19.2438	0.00266996					19.2438	0.0223355
			19.2839	0.00264238					19.2839	0.0222156
			19.3239	0.00261511					19.3239	0.0220962
			19.3639	0.00258813					19.3639	0.0219775
			19.4039	0.00256146					19.4039	0.0218593
			19.4439	0.00253508					19.4439	0.0217418
			19.4839	0.002509					19.4839	0.0216249
			19.5239	0.0024832					19.5239	0.0215086
			19.5639	0.00245769					19.5639	0.021393
			19.6039	0.00243247					19.6039	0.0212779
			19.6439	0.00240752					19.6439	0.0211634
			19.6839	0.00238285					19.6839	0.0210495
			19.7239	0.00235845					19.7239	0.0209363
			19.764	0.00233431					19.764	0.0208236
			19.804	0.00231045					19.804	0.0207115
			19.844	0.00228685					19.844	0.0206
			19.884	0.0022635					19.884	0.0204891
			19.924	0.00224042					19.924	0.0203787
			19.964	0.00221759					19.964	0.020269
			20.004	0.002195					20.004	0.0201598
			20.044	0.00217267					20.044	0.0200512
			20.084	0.00215058					20.084	0.0199432
			20.124	0.00212874					20.124	0.0198358
			20.164	0.00210713					20.164	0.0197289
			20.204	0.00208576					20.204	0.0196226
			20.244	0.00206462					20.244	0.0195169
			20.2841	0.00204371					20.2841	0.0194117
			20.3241	0.00202303					20.3241	0.0193071
			20.3641	0.00200258					20.3641	0.019203
			20.4041	0.00198235					20.4041	0.0190995
			20.4441	0.00196234					20.4441	0.0189966
			20.4841	0.00194255					20.4841	0.0188941
			20.5241	0.00192297					20.5241	0.0187923
			20.5641	0.00190361					20.5641	0.018691
			20.6041	0.00188445					20.6041	0.0185902
			20.6441	0.00186551					20.6441	0.01849
			20.6841	0.00184677					20.6841	0.0183903
			20.7241	0.00182823					20.7241	0.0182911
			20.7642	0.00180989					20.7642	0.0181925
			20.8042	0.00179176					20.8042	0.0180944
			20.8442	0.00177381					20.8442	0.0179968
			20.8842	0.00175606					20.8842	0.0178998
			20.9242	0.00173851					20.9242	0.0178033
			20.9642	0.00172114					20.9642	0.0177073
			21.0042	0.00170396					21.0042	0.0176118
			21.0442	0.00168696					21.0442	0.0175168
			21.0842	0.00167015					21.0842	0.0174224
			21.1242	0.00165352					21.1242	0.0173284
			21.1642	0.00163706					21.1642	0.017235
			21.2042	0.00162079					21.2042	0.0171421
			21.2442	0.00160469					21.2442	0.0170496
			21.2843	0.00158876					21.2843	0.0169577
			21.3243	0.001573					21.3243	0.0168663
			21.3643	0.00155741					21.3643	0.0167753
			21.4043	0.00154198					21.4043	0.0166849
			21.4443	0.00152672					21.4443	0.0165949
			21.4843	0.00151163					21.4843	0.0165055
			21.5243	0.00149669					21.5243	0.0164165
			21.5643	0.00148192					21.5643	0.016328
			21.6043	0.0014673					21.6043	0.01624
			21.6443	0.00145284					21.6443	0.0161525
			21.6843	0.00143853					21.6843	0.0160654
			21.7243	0.00142437					21.7243	0.0159788
			21.7644	0.00141036					21.7644	0.0158927
			21.8044	0.00139651					21.8044	0.0158071
			21.8444	0.0013828					21.8444	0.0157219
			21.8844	0.00136923					21.8844	0.0156372
			21.9244	0.00135581					21.9244	0.015553
			21.9644	0.00134253					21.9644	0.0154692
			22.0044	0.00132939					22.0044	0.0153859
			22.0444	0.00131639					22.0444	0.015303
			22.0844	0.00130352					22.0844	0.0152206
			22.1244	0.0012908					22.1244	0.0151386
			22.1644	0.0012782					22.1644	0.0150571
			22.2044	0.00126574					22.2044	0.014976
			22.2444	0.00125341					22.2444	0.0148954
			22.2845	0.00124121					22.2845	0.0148152
			22.3245	0.00122914					22.3245	0.0147355
			22.3645	0.00121719					22.3645	0.0146562
			22.4045	0.00120538					22.4045	0.0145773
			22.4445	0.00119368					22.4445	0.0144989
			22.4845	0.00118211					22.4845	0.0144209
			22.5245	0.00117065					22.5245	0.0143433
			22.5645	0.00115932					22.5645	0.0142661
			22.6045	0.00114811					22.6045	0.0141894
			22.6445	0.00113701					22.6445	0.0141131
			22.6845	0.00112603					22.6845	0.0140372
			22.7245	0.00111516					22.7245	0.0139617
			22.7646	0.00110441					22.7646	0.0138867
			22.8046	0.00109377					22.8046	0.0138121
			22.8446	0.00108324					22.8446	0.0137378
			22.8846	0.00107282					22.8846	0.013664
			22.9246	0.0010625					22.9246	0.0135906
			22.9646	0.0010523					22.9646	0.0135176
			23.0046	0.0010422					23.0046	0.013445
			23.0446	0.0010322					23.0446	0.0133728
			23.0846	0.00102231					23.0846	0.013301
			23.1246	0.00101252					23.1246	0.0132296
			23.1646	0.00100283					23.1646	0.0131586
			23.2046	0.000993244					23.2046	0.0130879
			23.2446	0.000983755					23.2446	0.0130177
			23.2847	0.000974364					23.2847	0.0129479
			23.3247	0.000965069					23.3247	0.0128784
			23.3647	0.000955871					23.3647	0.0128093
			23.4047	0.000946767					23.4047	0.0127406
			23.4447	0.000937757					23.4447	0.0126723
			23.4847	0.000928839					23.4847	0.0126044
			23.5247	0.000920013					23.5247	0.0125368
			23.5647	0.000911278					23.5647	0.0124696
			23.6047	0.000902632					23.6047	0.0124028
			23.6447	0.000894075					23.6447	0.0123364
			23.6847	0.000885605					23.6847	0.0122703
			23.7247	0.000877222					23.7247	0.0122046
			23.7648	0.000868925					23.7648	0.0121393
			23.8048	0.000860712					23.8048	0.0120743
			23.8448	0.000852584					23.8448	0.0120097
			23.8848	0.000844538					23.8848	0.0119454
			23.9248	0.000836575					23.9248	0.0118815
			23.9648	0.000828692					23.9648	0.0118179
			24.0048	0.00082089					24.0048	0.0117547
			24.0448	0.000813167					24.0448	0.0116919
			24.0848	0.000805522					24.0848	0.0116294
			24.1248	0.000797956					24.1248	0.0115672
			24.1648	0.000790466					24.1648	0.0115054
			24.2048	0.000783052					24.2048	0.0114439
			24.2448	0.000775713					24.2448	0.0113828
			24.2849	0.000768448					24.2849	0.011322
			24.3249	0.000761257					24.3249	0.0112616
			24.3649	0.000754139					24.3649	0.0112015
			24.4049	0.000747092					24.4049	0.0111417
			24.4449	0.000740117					24.4449	0.0110822
			24.4849	0.000733212					24.4849	0.0110231
			24.5249	0.000726377					24.5249	0.0109643
			24.5649	0.00071961					24.5649	0.0109058
			24.6049	0.000712912					24.6049	0.0108477
			24.6449	0.000706281					24.6449	0.0107899
			24.6849	0.000699716					24.6849	0.0107324
			24.7249	0.000693218					24.7249	0.0106752
			24.765	0.000686784					24.765	0.0106184
			24.805	0.000680416					24.805	0.0105618
			24.845	0.000674111					24.845	0.0105056
			24.885	0.000667869					24.885	0.0104497
			24.925	0.00066169					24.925	0.0103941
			24.965	0.000655572					24.965	0.0103388
			25.005	0.000649516					25.005	0.0102838
			25.045	0.00064352					25.045	0.0102291
			25.085	0.000637583					25.085	0.0101747
			25.125	0.000631706					25.125	0.0101206
			25.165	0.000625888					25.165	0.0100668
			25.205	0.000620127					25.205	0.0100134
			25.245	0.000614424					25.245	0.00996019
			25.2851	0.000608778					25.2851	0.0099073
			25.3251	0.000603187					25.3251	0.00985471
			25.3651	0.000597652					25.3651	0.0098024
			25.4051	0.000592172					25.4051	0.00975039
			25.4451	0.000586746					25.4451	0.00969867
			25.4851	0.000581374					25.4851	0.00964724
			25.5251	0.000576055					25.5251	0.00959609
			25.5651	0.000570789					25.5651	0.00954523
			25.6051	0.000565574					25.6051	0.00949465
			25.6451	0.000560411					25.6451	0.00944435
			25.6851	0.0005553					25.6851	0.00939433
			25.7251	0.000550238					25.7251	0.00934459
			25.7652	0.000545226					25.7652	0.00929512
			25.8052	0.000540264					25.8052	0.00924593
			25.8452	0.00053535					25.8452	0.00919701
			25.8852	0.000530485					25.8852	0.00914836
			25.9252	0.000525668					25.9252	0.00909999
			25.9652	0.000520898					25.9652	0.00905188
			26.0052	0.000516174					26.0052	0.00900404
			26.0452	0.000511497					26.0452	0.00895647
			26.0852	0.000506866					26.0852	0.00890916
			26.1252	0.00050228					26.1252	0.00886211
			26.1652	0.000497739					26.1652	0.00881533
			26.2052	0.000493242					26.2052	0.0087688
			26.2452	0.000488789					26.2452	0.00872253
			26.2853	0.00048438					26.2853	0.00867652
			26.3253	0.000480013					26.3253	0.00863077
			26.3653	0.00047569					26.3653	0.00858527
			26.4053	0.000471408					26.4053	0.00854002
			26.4453	0.000467168					26.4453	0.00849502
			26.4853	0.000462969					26.4853	0.00845028
			26.5253	0.000458811					26.5253	0.00840578
			26.5653	0.000454693					26.5653	0.00836153
			26.6053	0.000450615					26.6053	0.00831752
			26.6453	0.000446577					26.6453	0.00827376
			26.6853	0.000442578					26.6853	0.00823024
			26.7253	0.000438617					26.7253	0.00818696
			26.7654	0.000434695					26.7654	0.00814392
			26.8054	0.000430811					26.8054	0.00810112
			26.8454	0.000426964					26.8454	0.00805856
			26.8854	0.000423155					26.8854	0.00801624
			26.9254	0.000419382					26.9254	0.00797415
			26.9654	0.000415645					26.9654	0.00793229
			27.0054	0.000411945					27.0054	0.00789067
			27.0454	0.00040828					27.0454	0.00784927
			27.0854	0.00040465					27.0854	0.00780811
			27.1254	0.000401055					27.1254	0.00776717
			27.1654	0.000397495					27.1654	0.00772646
			27.2054	0.000393969					27.2054	0.00768598
			27.2454	0.000390477					27.2454	0.00764572
			27.2855	0.000387018					27.2855	0.00760568
			27.3255	0.000383592					27.3255	0.00756586
			27.3655	0.000380199					27.3655	0.00752627
			27.4055	0.000376839					27.4055	0.0074869
			27.4455	0.00037351					27.4455	0.00744774
			27.4855	0.000370214					27.4855	0.0074088
			27.5255	0.000366948					27.5255	0.00737007
			27.5655	0.000363714					27.5655	0.00733156
			27.6055	0.000360511					27.6055	0.00729327
			27.6455	0.000357338					27.6455	0.00725518
			27.6855	0.000354196					27.6855	0.00721731
			27.7255	0.000351083					27.7255	0.00717964
			27.7656	0.000348					27.7656	0.00714218
			27.8056	0.000344946					27.8056	0.00710493
			27.8456	0.000341921					27.8456	0.00706789
			27.8856	0.000338925					27.8856	0.00703105
			27.9256	0.000335957					27.9256	0.00699442
			27.9656	0.000333017					27.9656	0.00695798
			28.0056	0.000330105					28.0056	0.00692175
			28.0456	0.000327221					28.0456	0.00688572
			28.0856	0.000324364					28.0856	0.00684989
			28.1256	0.000321534					28.1256	0.00681425
			28.1656	0.00031873					28.1656	0.00677882
			28.2056	0.000315953					28.2056	0.00674358
			28.2456	0.000313202					28.2456	0.00670853
			28.2857	0.000310477					28.2857	0.00667367
			28.3257	0.000307777					28.3257	0.00663901
			28.3657	0.000305103					28.3657	0.00660454
			28.4057	0.000302454					28.4057	0.00657026
			28.4457	0.00029983					28.4457	0.00653617
			28.4857	0.000297231					28.4857	0.00650227
			28.5257	0.000294656					28.5257	0.00646855
			28.5657	0.000292105					28.5657	0.00643502
			28.6057	0.000289578					28.6057	0.00640168
			28.6457	0.000287074					28.6457	0.00636852
			28.6857	0.000284594					28.6857	0.00633554
			28.7257	0.000282137					28.7257	0.00630274
			28.7658	0.000279703					28.7658	0.00627012
			28.8058	0.000277292					28.8058	0.00623769
			28.8458	0.000274903					28.8458	0.00620543
			28.8858	0.000272536					28.8858	0.00617335
			28.9258	0.000270192					28.9258	0.00614144
			28.9658	0.000267869					28.9658	0.00610971
			29.0058	0.000265567					29.0058	0.00607816
			29.0458	0.000263288					29.0458	0.00604678
			29.0858	0.000261029					29.0858	0.00601557
			29.1258	0.000258791					29.1258	0.00598453
			29.1658	0.000256574					29.1658	0.00595367
			29.2058	0.000254378					29.2058	0.00592297
			29.2458	0.000252202					29.2458	0.00589244
			29.2859	0.000250046					29.2859	0.00586208
			29.3259	0.000247909					29.3259	0.00583189
			29.3659	0.000245793					29.3659	0.00580186
			29.4059	0.000243696					29.4059	0.005772
			29.4459	0.000241619					29.4459	0.0057423
			29.4859	0.00023956					29.4859	0.00571276
			29.5259	0.000237521					29.5259	0.00568339
			29.5659	0.0002355					29.5659	0.00565418
			29.6059	0.000233498					29.6059	0.00562513
			29.6459	0.000231514					29.6459	0.00559623
			29.6859	0.000229549					29.6859	0.0055675
			29.7259	0.000227601					29.7259	0.00553892
			29.766	0.000225672					29.766	0.0055105
			29.806	0.00022376					29.806	0.00548223
			29.846	0.000221866					29.846	0.00545412
			29.886	0.000219988					29.886	0.00542617
			29.926	0.000218129					29.926	0.00539836
			29.966	0.000216286					29.966	0.00537071
			30.006	0.00021446					30.006	0.00534321
			30.046	0.00021265					30.046	0.00531586
			30.086	0.000210857					30.086	0.00528866
			30.126	0.000209081					30.126	0.00526161
			30.166	0.00020732					30.166	0.00523471
			30.206	0.000205576					30.206	0.00520795
			30.246	0.000203847					30.246	0.00518134
			30.2861	0.000202135					30.2861	0.00515487
			30.3261	0.000200437					30.3261	0.00512855
			30.3661	0.000198756					30.3661	0.00510238
			30.4061	0.000197089					30.4061	0.00507634
			30.4461	0.000195437					30.4461	0.00505045
			30.4861	0.000193801					30.4861	0.0050247
			30.5261	0.000192179					30.5261	0.00499909
			30.5661	0.000190572					30.5661	0.00497362
			30.6061	0.00018898					30.6061	0.00494828
			30.6461	0.000187401					30.6461	0.00492309
			30.6861	0.000185838					30.6861	0.00489803
			30.7261	0.000184288					30.7261	0.00487311
			30.7662	0.000182752					30.7662	0.00484833
			30.8062	0.00018123					30.8062	0.00482368
			30.8462	0.000179722					30.8462	0.00479916
			30.8862	0.000178227					30.8862	0.00477478
			30.9262	0.000176746					30.9262	0.00475053
			30.9662	0.000175278					30.9662	0.00472641
			31.0062	0.000173823					31.0062	0.00470243
			31.0462	0.000172381					31.0462	0.00467857
			31.0862	0.000170952					31.0862	0.00465485
			31.1262	0.000169536					31.1262	0.00463125
			31.1662	0.000168133					31.1662	0.00460778
			31.2062	0.000166742					31.2062	0.00458444
			31.2462	0.000165363					31.2462	0.00456122
			31.2863	0.000163997					31.2863	0.00453813
			31.3263	0.000162644					31.3263	0.00451517
			31.3663	0.000161302					31.3663	0.00449233
			31.4063	0.000159972					31.4063	0.00446961
			31.4463	0.000158654					31.4463	0.00444702
			31.4863	0.000157348					31.4863	0.00442455
			31.5263	0.000156053					31.5263	0.0044022
			31.5663	0.00015477					31.5663	0.00437997
			31.6063	0.000153498					31.6063	0.00435787
			31.6463	0.000152238					31.6463	0.00433588
			31.6863	0.000150989					31.6863	0.00431401
			31.7263	0.00014975					31.7263	0.00429226
			31.7664	0.000148523					31.7664	0.00427063
			31.8064	0.000147307					31.8064	0.00424911
			31.8464	0.000146101					31.8464	0.00422771
			31.8864	0.000144906					31.8864	0.00420643
			31.9264	0.000143722					31.9264	0.00418526
			31.9664	0.000142548					31.9664	0.0041642
			32.0064	0.000141385					32.0064	0.00414326
			32.0464	0.000140231					32.0464	0.00412244
			32.0864	0.000139088					32.0864	0.00410172
			32.1264	0.000137955					32.1264	0.00408112
			32.1664	0.000136832					32.1664	0.00406062
			32.2064	0.000135719					32.2064	0.00404024
			32.2464	0.000134616					32.2464	0.00401997
			32.2865	0.000133522					32.2865	0.00399981
			32.3265	0.000132438					32.3265	0.00397975
			32.3665	0.000131363					32.3665	0.00395981
			32.4065	0.000130298					32.4065	0.00393997
			32.4465	0.000129242					32.4465	0.00392024
			32.4865	0.000128196					32.4865	0.00390061
			32.5265	0.000127158					32.5265	0.00388109
			32.5665	0.00012613					32.5665	0.00386167
			32.6065	0.000125111					32.6065	0.00384236
			32.6465	0.0001241					32.6465	0.00382315
			32.6865	0.000123099					32.6865	0.00380405
			32.7265	0.000122106					32.7265	0.00378505
			32.7666	0.000121121					32.7666	0.00376615
			32.8066	0.000120146					32.8066	0.00374735
			32.8466	0.000119178					32.8466	0.00372865
			32.8866	0.00011822					32.8866	0.00371006
			32.9266	0.000117269					32.9266	0.00369156
			32.9666	0.000116327					32.9666	0.00367316
			33.0066	0.000115393					33.0066	0.00365486
			33.0466	0.000114467					33.0466	0.00363666
			33.0866	0.000113549					33.0866	0.00361856
			33.1266	0.000112639					33.1266	0.00360055
			33.1666	0.000111737					33.1666	0.00358264
			33.2066	0.000110843					33.2066	0.00356482
			33.2466	0.000109957					33.2466	0.0035471
			33.2867	0.000109078					33.2867	0.00352948
			33.3267	0.000108206					33.3267	0.00351195
			33.3667	0.000107343					33.3667	0.00349451
			33.4067	0.000106486					33.4067	0.00347717
			33.4467	0.000105637					33.4467	0.00345992
			33.4867	0.000104796					33.4867	0.00344276
			33.5267	0.000103961					33.5267	0.00342569
			33.5667	0.000103134					33.5667	0.00340871
			33.6067	0.000102314					33.6067	0.00339183
			33.6467	0.000101501					33.6467	0.00337503
			33.6867	0.000100695					33.6867	0.00335833
			33.7267	9.9896e-05					33.7267	0.00334171
			33.7668	9.91037e-05					33.7668	0.00332518
			33.8068	9.83182e-05					33.8068	0.00330874
			33.8468	9.75394e-05					33.8468	0.00329239
			33.8868	9.67673e-05					33.8868	0.00327612
			33.9268	9.60018e-05					33.9268	0.00325994
			33.9668	9.52429e-05					33.9668	0.00324385
			34.0068	9.44904e-05					34.0068	0.00322784
			34.0468	9.37443e-05					34.0468	0.00321192
			34.0868	9.30046e-05					34.0868	0.00319608
			34.1268	9.22713e-05					34.1268	0.00318032
			34.1668	9.15441e-05					34.1668	0.00316465
			34.2068	9.08232e-05					34.2068	0.00314907
			34.2468	9.01084e-05					34.2468	0.00313356
			34.2869	8.93996e-05					34.2869	0.00311814
			34.3269	8.86969e-05					34.3269	0.0031028
			34.3669	8.80001e-05					34.3669	0.00308754
			34.4069	8.73093e-05					34.4069	0.00307236
			34.4469	8.66243e-05					34.4469	0.00305726
			34.4869	8.59452e-05					34.4869	0.00304224
			34.5269	8.52717e-05					34.5269	0.00302731
			34.5669	8.4604e-05					34.5669	0.00301245
			34.6069	8.39419e-05					34.6069	0.00299767
			34.6469	8.32855e-05					34.6469	0.00298296
			34.6869	8.26345e-05					34.6869	0.00296834
			34.7269	8.19891e-05					34.7269	0.00295379
			34.767	8.13491e-05					34.767	0.00293932
			34.807	8.07145e-05					34.807	0.00292493
			34.847	8.00852e-05					34.847	0.00291061
			34.887	7.94613e-05					34.887	0.00289637
			34.927	7.88426e-05					34.927	0.0028822
			34.967	7.82291e-05					34.967	0.0028681
			35.007	7.76208e-05					35.007	0.00285409
			35.047	7.70175e-05					35.047	0.00284014
			35.087	7.64194e-05					35.087	0.00282627
			35.127	7.58262e-05					35.127	0.00281247
			35.167	7.5238e-05					35.167	0.00279875
			35.207	7.46548e-05					35.207	0.0027851
			35.247	7.40764e-05					35.247	0.00277151
			35.2871	7.35029e-05					35.2871	0.002758
			35.3271	7.29342e-05					35.3271	0.00274457
			35.3671	7.23702e-05					35.3671	0.0027312
			35.4071	7.18109e-05					35.4071	0.0027179
			35.4471	7.12563e-05					35.4471	0.00270467
			35.4871	7.07064e-05					35.4871	0.00269151
			35.5271	7.0161e-05					35.5271	0.00267842
			35.5671	6.96201e-05					35.5671	0.0026654
			35.6071	6.90838e-05					35.6071	0.00265245
			35.6471	6.85519e-05					35.6471	0.00263957
			35.6871	6.80244e-05					35.6871	0.00262675
			35.7271	6.75014e-05					35.7271	0.002614
			35.7672	6.69826e-05					35.7672	0.00260132
			35.8072	6.64682e-05					35.8072	0.0025887
			35.8472	6.59581e-05					35.8472	0.00257615
			35.8872	6.54521e-05					35.8872	0.00256367
			35.9272	6.49504e-05					35.9272	0.00255125
			35.9672	6.44528e-05					35.9672	0.00253889
			36.0072	6.39593e-05					36.0072	0.0025266
			36.0472	6.34699e-05					36.0472	0.00251438
			36.0872	6.29846e-05					36.0872	0.00250222
			36.1272	6.25033e-05					36.1272	0.00249012
			36.1672	6.20259e-05					36.1672	0.00247808
			36.2072	6.15525e-05					36.2072	0.00246611
			36.2472	6.10829e-05					36.2472	0.0024542
			36.2873	6.06173e-05					36.2873	0.00244236
			36.3273	6.01555e-05					36.3273	0.00243057
			36.3673	5.96974e-05					36.3673	0.00241885
			36.4073	5.92432e-05					36.4073	0.00240718
			36.4473	5.87926e-05					36.4473	0.00239558
			36.4873	5.83458e-05					36.4873	0.00238404
			36.5273	5.79027e-05					36.5273	0.00237256
			36.5673	5.74631e-05					36.5673	0.00236114
			36.6073	5.70272e-05					36.6073	0.00234977
			36.6473	5.65949e-05					36.6473	0.00233847
			36.6873	5.6166e-05					36.6873	0.00232722
			36.7273	5.57407e-05					36.7273	0.00231604
			36.7674	5.53189e-05					36.7674	0.00230491
			36.8074	5.49005e-05					36.8074	0.00229384
			36.8474	5.44856e-05					36.8474	0.00228283
			36.8874	5.4074e-05					36.8874	0.00227187
			36.9274	5.36658e-05					36.9274	0.00226097
			36.9674	5.32609e-05					36.9674	0.00225013
			37.0074	5.28593e-05					37.0074	0.00223934
			37.0474	5.2461e-05					37.0474	0.00222861
			37.0874	5.20659e-05					37.0874	0.00221794
			37.1274	5.1674e-05					37.1274	0.00220732
			37.1674	5.12853e-05					37.1674	0.00219675
			37.2074	5.08998e-05					37.2074	0.00218624
			37.2474	5.05174e-05					37.2474	0.00217579
			37.2875	5.01381e-05					37.2875	0.00216539
			37.3275	4.97619e-05					37.3275	0.00215504
			37.3675	4.93887e-05					37.3675	0.00214475
			37.4075	4.90185e-05					37.4075	0.0021345
			37.4475	4.86514e-05					37.4475	0.00212432
			37.4875	4.82872e-05					37.4875	0.00211418
			37.5275	4.7926e-05					37.5275	0.0021041
			37.5675	4.75676e-05					37.5675	0.00209407
			37.6075	4.72122e-05					37.6075	0.00208409
			37.6475	4.68596e-05					37.6475	0.00207416
			37.6875	4.65099e-05					37.6875	0.00206428
			37.7275	4.6163e-05					37.7275	0.00205446
			37.7676	4.58189e-05					37.7676	0.00204468
			37.8076	4.54775e-05					37.8076	0.00203496
			37.8476	4.51389e-05					37.8476	0.00202528
			37.8876	4.4803e-05					37.8876	0.00201566
			37.9276	4.44699e-05					37.9276	0.00200608
			37.9676	4.41394e-05					37.9676	0.00199655
			38.0076	4.38115e-05					38.0076	0.00198708
			38.0476	4.34863e-05					38.0476	0.00197765
			38.0876	4.31637e-05					38.0876	0.00196827
			38.1276	4.28436e-05					38.1276	0.00195894
			38.1676	4.25261e-05					38.1676	0.00194965
			38.2076	4.22112e-05					38.2076	0.00194041
			38.2476	4.18988e-05					38.2476	0.00193122
			38.2877	4.15889e-05					38.2877	0.00192208
			38.3277	4.12814e-05					38.3277	0.00191299
			38.3677	4.09764e-05					38.3677	0.00190394
			38.4077	4.06739e-05					38.4077	0.00189494
			38.4477	4.03737e-05					38.4477	0.00188598
			38.4877	4.0076e-05					38.4877	0.00187707
			38.5277	3.97806e-05					38.5277	0.0018682
			38.5677	3.94875e-05					38.5677	0.00185938
			38.6077	3.91968e-05					38.6077	0.00185061
			38.6477	3.89084e-05					38.6477	0.00184188
			38.6877	3.86223e-05					38.6877	0.00183319
			38.7277	3.83385e-05					38.7277	0.00182455
			38.7678	3.80569e-05					38.7678	0.00181596
			38.8078	3.77775e-05					38.8078	0.0018074
			38.8478	3.75004e-05					38.8478	0.00179889
			38.8878	3.72255e-05					38.8878	0.00179043
			38.9278	3.69527e-05					38.9278	0.001782
			38.9678	3.66821e-05					38.9678	0.00177362
			39.0078	3.64136e-05					39.0078	0.00176529
			39.0478	3.61473e-05					39.0478	0.00175699
			39.0878	3.5883e-05					39.0878	0.00174874
			39.1278	3.56208e-05					39.1278	0.00174053
			39.1678	3.53607e-05					39.1678	0.00173236
			39.2078	3.51027e-05					39.2078	0.00172423
			39.2478	3.48467e-05					39.2478	0.00171615
			39.2879	3.45927e-05					39.2879	0.0017081
			39.3279	3.43407e-05					39.3279	0.0017001
			39.3679	3.40907e-05					39.3679	0.00169213
			39.4079	3.38426e-05					39.4079	0.00168421
			39.4479	3.35965e-05					39.4479	0.00167633
			39.4879	3.33523e-05					39.4879	0.00166849
			39.5279	3.31101e-05					39.5279	0.00166068
			39.5679	3.28697e-05					39.5679	0.00165292
			39.6079	3.26312e-05					39.6079	0.00164519
			39.6479	3.23946e-05					39.6479	0.00163751
			39.6879	3.21598e-05					39.6879	0.00162986
			39.7279	3.19269e-05					39.7279	0.00162226
			39.768	3.16958e-05					39.768	0.00161469
			39.808	3.14665e-05					39.808	0.00160716
			39.848	3.1239e-05					39.848	0.00159966
			39.888	3.10133e-05					39.888	0.00159221
			39.928	3.07893e-05					39.928	0.00158479
			39.968	3.05671e-05					39.968	0.00157741
			40.008	3.03466e-05					40.008	0.00157007
			40.048	3.01278e-05					40.048	0.00156276
			40.088	2.99107e-05					40.088	0.00155549
			40.128	2.96953e-05					40.128	0.00154826
			40.168	2.94816e-05					40.168	0.00154107
			40.208	2.92696e-05					40.208	0.00153391
			40.248	2.90591e-05					40.248	0.00152678
			40.2881	2.88504e-05					40.2881	0.0015197
			40.3281	2.86432e-05					40.3281	0.00151264
			40.3681	2.84377e-05					40.3681	0.00150563
			40.4081	2.82337e-05					40.4081	0.00149865
			40.4481	2.80313e-05					40.4481	0.0014917
			40.4881	2.78305e-05					40.4881	0.00148479
			40.5281	2.76312e-05					40.5281	0.00147791
			40.5681	2.74335e-05					40.5681	0.00147107
			40.6081	2.72373e-05					40.6081	0.00146426
			40.6481	2.70426e-05					40.6481	0.00145749
			40.6881	2.68494e-05					40.6881	0.00145075
			40.7281	2.66577e-05					40.7281	0.00144404
			40.7682	2.64675e-05					40.7682	0.00143737
			40.8082	2.62787e-05					40.8082	0.00143073
			40.8482	2.60914e-05					40.8482	0.00142413
			40.8882	2.59056e-05					40.8882	0.00141756
			40.9282	2.57211e-05					40.9282	0.00141102
			40.9682	2.55381e-05					40.9682	0.00140451
			41.0082	2.53565e-05					41.0082	0.00139804
			41.0482	2.51763e-05					41.0482	0.00139159
			41.0882	2.49975e-05					41.0882	0.00138518
			41.1282	2.482e-05					41.1282	0.00137881
			41.1682	2.46439e-05					41.1682	0.00137246
			41.2082	2.44691e-05					41.2082	0.00136615
			41.2482	2.42957e-05					41.2482	0.00135986
			41.2883	2.41236e-05					41.2883	0.00135361
			41.3283	2.39528e-05					41.3283	0.00134739
			41.3683	2.37833e-05					41.3683	0.0013412
			41.4083	2.36152e-05					41.4083	0.00133505
			41.4483	2.34483e-05					41.4483	0.00132892
			41.4883	2.32826e-05					41.4883	0.00132282
			41.5283	2.31183e-05					41.5283	0.00131675
			41.5683	2.29551e-05					41.5683	0.00131072
			41.6083	2.27933e-05					41.6083	0.00130471
			41.6483	2.26326e-05					41.6483	0.00129873
			41.6883	2.24732e-05					41.6883	0.00129279
			41.7283	2.2315e-05					41.7283	0.00128687
			41.7684	2.2158e-05					41.7684	0.00128098
			41.8084	2.20022e-05					41.8084	0.00127512
			41.8484	2.18476e-05					41.8484	0.00126929
			41.8884	2.16941e-05					41.8884	0.00126349
			41.9284	2.15418e-05					41.9284	0.00125772
			41.9684	2.13906e-05					41.9684	0.00125198
			42.0084	2.12406e-05					42.0084	0.00124626
			42.0484	2.10918e-05					42.0484	0.00124057
			42.0884	2.0944e-05					42.0884	0.00123492
			42.1284	2.07974e-05					42.1284	0.00122929
			42.1684	2.06519e-05					42.1684	0.00122368
			42.2084	2.05075e-05					42.2084	0.00121811
			42.2484	2.03641e-05					42.2484	0.00121256
			42.2885	2.02219e-05					42.2885	0.00120704
			42.3285	2.00807e-05					42.3285	0.00120155
			42.3685	1.99406e-05					42.3685	0.00119608
			42.4085	1.98015e-05					42.4085	0.00119064
			42.4485	1.96635e-05					42.4485	0.00118523
			42.4885	1.95266e-05					42.4885	0.00117985
			42.5285	1.93906e-05					42.5285	0.00117449
			42.5685	1.92557e-05					42.5685	0.00116915
			42.6085	1.91218e-05					42.6085	0.00116385
			42.6485	1.89889e-05					42.6485	0.00115857
			42.6885	1.88569e-05					42.6885	0.00115332
			42.7285	1.8726e-05					42.7285	0.00114809
			42.7686	1.85961e-05					42.7686	0.00114289
			42.8086	1.84671e-05					42.8086	0.00113771
			42.8486	1.83391e-05					42.8486	0.00113256
			42.8886	1.8212e-05					42.8886	0.00112743
			42.9286	1.80859e-05					42.9286	0.00112233
			42.9686	1.79608e-05					42.9686	0.00111726
			43.0086	1.78366e-05					43.0086	0.0011122
			43.0486	1.77133e-05					43.0486	0.00110718
			43.0886	1.75909e-05					43.0886	0.00110218
			43.1286	1.74694e-05					43.1286	0.0010972
			43.1686	1.73488e-05					43.1686	0.00109225
			43.2086	1.72292e-05					43.2086	0.00108732
			43.2486	1.71104e-05					43.2486	0.00108242
			43.2887	1.69925e-05					43.2887	0.00107754
			43.3287	1.68755e-05					43.3287	0.00107268
			43.3687	1.67593e-05					43.3687	0.00106785
			43.4087	1.66441e-05					43.4087	0.00106304
			43.4487	1.65296e-05					43.4487	0.00105825
			43.4887	1.6416e-05					43.4887	0.00105349
			43.5287	1.63033e-05					43.5287	0.00104875
			43.5687	1.61914e-05					43.5687	0.00104404
			43.6087	1.60803e-05					43.6087	0.00103935
			43.6487	1.59701e-05					43.6487	0.00103468
			43.6887	1.58606e-05					43.6887	0.00103003
			43.7287	1.5752e-05					43.7287	0.0010254
			43.7688	1.56442e-05					43.7688	0.0010208
			43.8088	1.55371e-05					43.8088	0.00101622
			43.8488	1.54309e-05					43.8488	0.00101167
			43.8888	1.53254e-05					43.8888	0.00100713
			43.9288	1.52207e-05					43.9288	0.00100262
			43.9688	1.51168e-05					43.9688	0.00099813
			44.0088	1.50137e-05					44.0088	0.000993661
			44.0488	1.49113e-05					44.0488	0.000989214
			44.0888	1.48097e-05					44.0888	0.000984789
			44.1288	1.47088e-05					44.1288	0.000980385
			44.1688	1.46086e-05					44.1688	0.000976002
			44.2088	1.45092e-05					44.2088	0.000971641
			44.2488	1.44105e-05					44.2488	0.000967301
			44.2889	1.43126e-05					44.2889	0.000962982
			44.3289	1.42153e-05					44.3289	0.000958684
			44.3689	1.41188e-05					44.3689	0.000954406
			44.4089	1.4023e-05					44.4089	0.00095015
			44.4489	1.39279e-05					44.4489	0.000945914
			44.4889	1.38334e-05					44.4889	0.000941698
			44.5289	1.37397e-05					44.5289	0.000937503
			44.5689	1.36466e-05					44.5689	0.000933329
			44.6089	1.35543e-05					44.6089	0.000929174
			44.6489	1.34626e-05					44.6489	0.00092504
			44.6889	1.33715e-05					44.6889	0.000920925
			44.7289	1.32812e-05					44.7289	0.000916831
			44.769	1.31915e-05					44.769	0.000912756
			44.809	1.31024e-05					44.809	0.000908701
			44.849	1.3014e-05					44.849	0.000904665
			44.889	1.29263e-05					44.889	0.000900649
			44.929	1.28391e-05					44.929	0.000896652
			44.969	1.27526e-05					44.969	0.000892675
			45.009	1.26668e-05					45.009	0.000888716
			45.049	1.25815e-05					45.049	0.000884777
			45.089	1.24969e-05					45.089	0.000880857
			45.129	1.24129e-05					45.129	0.000876955
			45.169	1.23295e-05					45.169	0.000873073
			45.209	1.22467e-05					45.209	0.000869209
			45.249	1.21645e-05					45.249	0.000865363
			45.2891	1.20829e-05					45.2891	0.000861536
			45.3291	1.20019e-05					45.3291	0.000857728
			45.3691	1.19215e-05					45.3691	0.000853938
			45.4091	1.18416e-05					45.4091	0.000850166
			45.4491	1.17624e-05					45.4491	0.000846412
			45.4891	1.16837e-05					45.4891	0.000842676
			45.5291	1.16055e-05					45.5291	0.000838958
			45.5691	1.1528e-05					45.5691	0.000835257
			45.6091	1.1451e-05					45.6091	0.000831575
			45.6491	1.13745e-05					45.6491	0.00082791
			45.6891	1.12986e-05					45.6891	0.000824263
			45.7291	1.12233e-05					45.7291	0.000820633
			45.7692	1.11484e-05					45.7692	0.00081702
			45.8092	1.10742e-05					45.8092	0.000813425
			45.8492	1.10004e-05					45.8492	0.000809847
			45.8892	1.09272e-05					45.8892	0.000806286
			45.9292	1.08545e-05					45.9292	0.000802742
			45.9692	1.07823e-05					45.9692	0.000799215
			46.0092	1.07107e-05					46.0092	0.000795705
			46.0492	1.06396e-05					46.0492	0.000792212
			46.0892	1.05689e-05					46.0892	0.000788735
			46.1292	1.04988e-05					46.1292	0.000785275
			46.1692	1.04292e-05					46.1692	0.000781831
			46.2092	1.03601e-05					46.2092	0.000778404
			46.2492	1.02914e-05					46.2492	0.000774993
			46.2893	1.02233e-05					46.2893	0.000771599
			46.3293	1.01556e-05					46.3293	0.00076822
			46.3693	1.00885e-05					46.3693	0.000764858
			46.4093	1.00218e-05					46.4093	0.000761511
			46.4493	9.95556e-06					46.4493	0.000758181
			46.4893	9.88981e-06					46.4893	0.000754866
			46.5293	9.82453e-06					46.5293	0.000751567
			46.5693	9.75972e-06					46.5693	0.000748284
			46.6093	9.69536e-06					46.6093	0.000745016
			46.6493	9.63147e-06					46.6493	0.000741764
			46.6893	9.56803e-06					46.6893	0.000738527
			46.7293	9.50503e-06					46.7293	0.000735306
			46.7694	9.44249e-06					46.7694	0.000732099
			46.8094	9.38039e-06					46.8094	0.000728908
			46.8494	9.31873e-06					46.8494	0.000725733
			46.8894	9.2575e-06					46.8894	0.000722572
			46.9294	9.19671e-06					46.9294	0.000719426
			46.9694	9.13635e-06					46.9694	0.000716295
			47.0094	9.07642e-06					47.0094	0.000713179
			47.0494	9.01691e-06					47.0494	0.000710077
			47.0894	8.95782e-06					47.0894	0.000706991
			47.1294	8.89915e-06					47.1294	0.000703918
			47.1694	8.84089e-06					47.1694	0.000700861
			47.2094	8.78304e-06					47.2094	0.000697818
			47.2494	8.7256e-06					47.2494	0.000694789
			47.2895	8.66857e-06					47.2895	0.000691774
			47.3295	8.61193e-06					47.3295	0.000688774
			47.3695	8.5557e-06					47.3695	0.000685787
			47.4095	8.49986e-06					47.4095	0.000682815
			47.4495	8.44441e-06					47.4495	0.000679857
			47.4895	8.38936e-06					47.4895	0.000676913
			47.5295	8.33469e-06					47.5295	0.000673983
			47.5695	8.2804e-06					47.5695	0.000671066
			47.6095	8.2265e-06					47.6095	0.000668163
			47.6495	8.17297e-06					47.6495	0.000665274
			47.6895	8.11982e-06					47.6895	0.000662398
			47.7295	8.06704e-06					47.7295	0.000659536
			47.7696	8.01463e-06					47.7696	0.000656687
			47.8096	7.96259e-06					47.8096	0.000653852
			47.8496	7.91091e-06					47.8496	0.00065103
			47.8896	7.85959e-06					47.8896	0.000648221
			47.9296	7.80863e-06					47.9296	0.000645426
			47.9696	7.75803e-06					47.9696	0.000642643
			48.0096	7.70778e-06					48.0096	0.000639874
			48.0496	7.65788e-06					48.0496	0.000637117
			48.0896	7.60833e-06					48.0896	0.000634374
			48.1296	7.55913e-06					48.1296	0.000631643
			48.1696	7.51027e-06					48.1696	0.000628925
			48.2096	7.46174e-06					48.2096	0.00062622
			48.2496	7.41356e-06					48.2496	0.000623527
			48.2897	7.36571e-06					48.2897	0.000620847
			48.3297	7.31819e-06					48.3297	0.00061818
			48.3697	7.27101e-06					48.3697	0.000615525
			48.4097	7.22415e-06					48.4097	0.000612882
			48.4497	7.17762e-06					48.4497	0.000610252
			48.4897	7.13141e-06					48.4897	0.000607634
			48.5297	7.08552e-06					48.5297	0.000605028
			48.5697	7.03994e-06					48.5697	0.000602434
			48.6097	6.99469e-06					48.6097	0.000599853
			48.6497	6.94975e-06					48.6497	0.000597283
			48.6897	6.90511e-06					48.6897	0.000594726
			48.7297	6.86079e-06					48.7297	0.00059218
			48.7698	6.81678e-06					48.7698	0.000589646
			48.8098	6.77306e-06					48.8098	0.000587124
			48.8498	6.72965e-06					48.8498	0.000584614
			48.8898	6.68654e-06					48.8898	0.000582115
			48.9298	6.64373e-06					48.9298	0.000579628
			48.9698	6.60121e-06					48.9698	0.000577153
			49.0098	6.55899e-06					49.0098	0.000574689
			49.0498	6.51705e-06					49.0498	0.000572236
			49.0898	6.47541e-06					49.0898	0.000569795
			49.1298	6.43405e-06					49.1298	0.000567365
			49.1698	6.39298e-06					49.1698	0.000564947
			49.2098	6.35219e-06					49.2098	0.000562539
			49.2498	6.31168e-06					49.2498	0.000560143
			49.2899	6.27144e-06					49.2899	0.000557758
			49.3299	6.23149e-06					49.3299	0.000555384
			49.3699	6.1918e-06					49.3699	0.000553021
			49.4099	6.15239e-06					49.4099	0.000550669
			49.4499	6.11325e-06					49.4499	0.000548327
			49.4899	6.07438e-06					49.4899	0.000545997
			49.5299	6.03578e-06					49.5299	0.000543677
			49.5699	5.99744e-06					49.5699	0.000541368
			49.6099	5.95936e-06					49.6099	0.00053907
			49.6499	5.92154e-06					49.6499	0.000536782
			49.6899	5.88398e-06					49.6899	0.000534505
			49.7299	5.84668e-06					49.7299	0.000532238
			49.77	5.80963e-06					49.77	0.000529982
			49.81	5.77283e-06					49.81	0.000527736
			49.85	5.73629e-06					49.85	0.000525501
			49.89	5.69999e-06					49.89	0.000523276
			49.93	5.66394e-06					49.93	0.000521061
			49.97	5.62814e-06					49.97	0.000518856
			50.01	5.59258e-06					50.01	0.000516662
			50.05	5.55726e-06					50.05	0.000514477
			50.09	5.52218e-06					50.09	0.000512303
			50.13	5.48735e-06					50.13	0.000510138
			50.17	5.45274e-06					50.17	0.000507984
			50.21	5.41838e-06					50.21	0.000505839
			50.2501	5.38424e-06					50.2501	0.000503705
			50.2901	5.35034e-06					50.2901	0.00050158
			50.3301	5.31667e-06					50.3301	0.000499464
			50.3701	5.28322e-06					50.3701	0.000497359
			50.4101	5.25001e-06					50.4101	0.000495263
			50.4501	5.21701e-06					50.4501	0.000493177
			50.4901	5.18425e-06					50.4901	0.0004911
			50.5301	5.1517e-06					50.5301	0.000489033
			50.5701	5.11937e-06					50.5701	0.000486975
			50.6101	5.08726e-06					50.6101	0.000484927
			50.6501	5.05537e-06					50.6501	0.000482888
			50.6901	5.02369e-06					50.6901	0.000480858
			50.7301	4.99223e-06					50.7301	0.000478838
			50.7702	4.96098e-06					50.7702	0.000476827
			50.8102	4.92994e-06					50.8102	0.000474825
			50.8502	4.8991e-06					50.8502	0.000472832
			50.8902	4.86848e-06					50.8902	0.000470849
			50.9302	4.83806e-06					50.9302	0.000468874
			50.9702	4.80785e-06					50.9702	0.000466908
			51.0102	4.77784e-06					51.0102	0.000464952
			51.0502	4.74803e-06					51.0502	0.000463004
			51.0902	4.71842e-06					51.0902	0.000461065
			51.1302	4.68901e-06					51.1302	0.000459135
			51.1702	4.6598e-06					51.1702	0.000457214
			51.2102	4.63079e-06					51.2102	0.000455301
			51.2503	4.60197e-06					51.2503	0.000453397
			51.2903	4.57334e-06					51.2903	0.000451502
			51.3303	4.5449e-06					51.3303	0.000449616
			51.3703	4.51665e-06					51.3703	0.000447738
			51.4103	4.4886e-06					51.4103	0.000445868
			51.4503	4.46073e-06					51.4503	0.000444007
			51.4903	4.43304e-06					51.4903	0.000442155
			51.5303	4.40555e-06					51.5303	0.000440311
			51.5703	4.37823e-06					51.5703	0.000438475
			51.6103	4.3511e-06					51.6103	0.000436648
			51.6503	4.32415e-06					51.6503	0.000434828
			51.6903	4.29738e-06					51.6903	0.000433018
			51.7303	4.27078e-06					51.7303	0.000431215
			51.7704	4.24437e-06					51.7704	0.00042942
			51.8104	4.21813e-06					51.8104	0.000427634
			51.8504	4.19206e-06					51.8504	0.000425856
			51.8904	4.16617e-06					51.8904	0.000424085
			51.9304	4.14045e-06					51.9304	0.000422323
			51.9704	4.1149e-06					51.9704	0.000420569
			52.0104	4.08952e-06					52.0104	0.000418822
			52.0504	4.06431e-06					52.0504	0.000417084
			52.0904	4.03927e-06					52.0904	0.000415353
			52.1304	4.01439e-06					52.1304	0.00041363
			52.1704	3.98968e-06					52.1704	0.000411915
			52.2104	3.96513e-06					52.2104	0.000410208
			52.2505	3.94074e-06					52.2505	0.000408508
			52.2905	3.91652e-06					52.2905	0.000406816
			52.3305	3.89246e-06					52.3305	0.000405132
			52.3705	3.86855e-06					52.3705	0.000403455
			52.4105	3.8448e-06					52.4105	0.000401786
			52.4505	3.82121e-06					52.4505	0.000400124
			52.4905	3.79778e-06					52.4905	0.00039847
			52.5305	3.7745e-06					52.5305	0.000396823
			52.5705	3.75137e-06					52.5705	0.000395184
			52.6105	3.7284e-06					52.6105	0.000393552
			52.6505	3.70558e-06					52.6505	0.000391927
			52.6905	3.68291e-06					52.6905	0.00039031
			52.7305	3.66038e-06					52.7305	0.0003887
			52.7706	3.63801e-06					52.7706	0.000387097
			52.8106	3.61578e-06					52.8106	0.000385501
			52.8506	3.5937e-06					52.8506	0.000383912
			52.8906	3.57177e-06					52.8906	0.000382331
			52.9306	3.54997e-06					52.9306	0.000380757
			52.9706	3.52833e-06					52.9706	0.000379189
			53.0106	3.50682e-06					53.0106	0.000377629
			53.0506	3.48545e-06					53.0506	0.000376076
			53.0906	3.46423e-06					53.0906	0.000374529
			53.1306	3.44314e-06					53.1306	0.00037299
			53.1706	3.4222e-06					53.1706	0.000371457
			53.2106	3.40138e-06					53.2106	0.000369932
			53.2507	3.38071e-06					53.2507	0.000368413
			53.2907	3.36017e-06					53.2907	0.000366901
			53.3307	3.33977e-06					53.3307	0.000365395
			53.3707	3.31949e-06					53.3707	0.000363897
			53.4107	3.29935e-06					53.4107	0.000362405
			53.4507	3.27935e-06					53.4507	0.000360919
			53.4907	3.25947e-06					53.4907	0.000359441
			53.5307	3.23972e-06					53.5307	0.000357969
			53.5707	3.2201e-06					53.5707	0.000356503
			53.6107	3.20061e-06					53.6107	0.000355044
			53.6507	3.18125e-06					53.6507	0.000353592
			53.6907	3.16201e-06					53.6907	0.000352145
			53.7307	3.1429e-06					53.7307	0.000350706
			53.7708	3.12391e-06					53.7708	0.000349273
			53.8108	3.10505e-06					53.8108	0.000347846
			53.8508	3.0863e-06					53.8508	0.000346425
			53.8908	3.06768e-06					53.8908	0.000345011
			53.9308	3.04918e-06					53.9308	0.000343603
			53.9708	3.0308e-06					53.9708	0.000342202
			54.0108	3.01254e-06					54.0108	0.000340806
			54.0508	2.9944e-06					54.0508	0.000339417
			54.0908	2.97638e-06					54.0908	0.000338034
			54.1308	2.95847e-06					54.1308	0.000336657
			54.1708	2.94068e-06					54.1708	0.000335286
			54.2108	2.923e-06					54.2108	0.000333921
			54.2509	2.90544e-06					54.2509	0.000332562
			54.2909	2.88799e-06					54.2909	0.00033121
			54.3309	2.87065e-06					54.3309	0.000329863
			54.3709	2.85343e-06					54.3709	0.000328522
			54.4109	2.83632e-06					54.4109	0.000327187
			54.4509	2.81931e-06					54.4509	0.000325858
			54.4909	2.80242e-06					54.4909	0.000324535
			54.5309	2.78564e-06					54.5309	0.000323218
			54.5709	2.76896e-06					54.5709	0.000321906
			54.6109	2.75239e-06					54.6109	0.000320601
			54.6509	2.73593e-06					54.6509	0.000319301
			54.6909	2.71958e-06					54.6909	0.000318007
			54.7309	2.70333e-06					54.7309	0.000316718
			54.771	2.68718e-06					54.771	0.000315436
			54.811	2.67114e-06					54.811	0.000314158
			54.851	2.6552e-06					54.851	0.000312887
			54.891	2.63936e-06					54.891	0.000311621
			54.931	2.62363e-06					54.931	0.000310361
			54.971	2.60799e-06					54.971	0.000309106
			55.011	2.59246e-06					55.011	0.000307857
			55.051	2.57702e-06					55.051	0.000306613
			55.091	2.56169e-06					55.091	0.000305375
			55.131	2.54645e-06					55.131	0.000304142
			55.171	2.53131e-06					55.171	0.000302914
			55.211	2.51627e-06					55.211	0.000301692
			55.2511	2.50132e-06					55.2511	0.000300476
			55.2911	2.48647e-06					55.2911	0.000299264
			55.3311	2.47171e-06					55.3311	0.000298058
			55.3711	2.45705e-06					55.3711	0.000296857
			55.4111	2.44248e-06					55.4111	0.000295662
			55.4511	2.42801e-06					55.4511	0.000294472
			55.4911	2.41362e-06					55.4911	0.000293287
			55.5311	2.39933e-06					55.5311	0.000292107
			55.5711	2.38513e-06					55.5711	0.000290932
			55.6111	2.37102e-06					55.6111	0.000289762
			55.6511	2.357e-06					55.6511	0.000288598
			55.6911	2.34307e-06					55.6911	0.000287439
			55.7311	2.32923e-06					55.7311	0.000286284
			55.7712	2.31547e-06					55.7712	0.000285135
			55.8112	2.3018e-06					55.8112	0.000283991
			55.8512	2.28822e-06					55.8512	0.000282852
			55.8912	2.27473e-06					55.8912	0.000281717
			55.9312	2.26132e-06					55.9312	0.000280588
			55.9712	2.248e-06					55.9712	0.000279464
			56.0112	2.23476e-06					56.0112	0.000278344
			56.0512	2.2216e-06					56.0512	0.00027723
			56.0912	2.20853e-06					56.0912	0.00027612
			56.1312	2.19554e-06					56.1312	0.000275015
			56.1712	2.18263e-06					56.1712	0.000273915
			56.2112	2.16981e-06					56.2112	0.00027282
			56.2513	2.15706e-06					56.2513	0.000271729
			56.2913	2.1444e-06					56.2913	0.000270643
			56.3313	2.13181e-06					56.3313	0.000269562
			56.3713	2.11931e-06					56.3713	0.000268486
			56.4113	2.10688e-06					56.4113	0.000267414
			56.4513	2.09453e-06					56.4513	0.000266347
			56.4913	2.08227e-06					56.4913	0.000265284
			56.5313	2.07007e-06					56.5313	0.000264227
			56.5713	2.05796e-06					56.5713	0.000263173
			56.6113	2.04592e-06					56.6113	0.000262125
			56.6513	2.03395e-06					56.6513	0.000261081
			56.6913	2.02207e-06					56.6913	0.000260041
			56.7313	2.01025e-06					56.7313	0.000259006
			56.7714	1.99851e-06					56.7714	0.000257975
			56.8114	1.98685e-06					56.8114	0.000256949
			56.8514	1.97526e-06					56.8514	0.000255927
			56.8914	1.96374e-06					56.8914	0.00025491
			56.9314	1.95229e-06					56.9314	0.000253897
			56.9714	1.94091e-06					56.9714	0.000252889
			57.0114	1.92961e-06					57.0114	0.000251885
			57.0514	1.91838e-06					57.0514	0.000250885
			57.0914	1.90721e-06					57.0914	0.000249889
			57.1314	1.89612e-06					57.1314	0.000248898
			57.1714	1.8851e-06					57.1714	0.000247911
			57.2114	1.87414e-06					57.2114	0.000246928
			57.2515	1.86325e-06					57.2515	0.00024595
			57.2915	1.85244e-06					57.2915	0.000244976
			57.3315	1.84168e-06					57.3315	0.000244006
			57.3715	1.831e-06					57.3715	0.00024304
			57.4115	1.82038e-06					57.4115	0.000242078
			57.4515	1.80983e-06					57.4515	0.000241121
			57.4915	1.79935e-06					57.4915	0.000240167
			57.5315	1.78893e-06					57.5315	0.000239218
			57.5715	1.77857e-06					57.5715	0.000238273
			57.6115	1.76828e-06					57.6115	0.000237331
			57.6515	1.75806e-06					57.6515	0.000236394
			57.6915	1.74789e-06					57.6915	0.000235461
			57.7315	1.73779e-06					57.7315	0.000234532
			57.7716	1.72776e-06					57.7716	0.000233607
			57.8116	1.71778e-06					57.8116	0.000232686
			57.8516	1.70787e-06					57.8516	0.000231769
			57.8916	1.69802e-06					57.8916	0.000230855
			57.9316	1.68823e-06					57.9316	0.000229946
			57.9716	1.6785e-06					57.9716	0.000229041
			58.0116	1.66883e-06					58.0116	0.000228139
			58.0516	1.65922e-06					58.0516	0.000227241
			58.0916	1.64967e-06					58.0916	0.000226347
			58.1316	1.64018e-06					58.1316	0.000225457
			58.1716	1.63075e-06					58.1716	0.000224571
			58.2116	1.62137e-06					58.2116	0.000223689
			58.2517	1.61206e-06					58.2517	0.00022281
			58.2917	1.6028e-06					58.2917	0.000221935
			58.3317	1.5936e-06					58.3317	0.000221064
			58.3717	1.58445e-06					58.3717	0.000220197
			58.4117	1.57537e-06					58.4117	0.000219333
			58.4517	1.56634e-06					58.4517	0.000218473
			58.4917	1.55736e-06					58.4917	0.000217616
			58.5317	1.54844e-06					58.5317	0.000216764
			58.5717	1.53957e-06					58.5717	0.000215914
			58.6117	1.53076e-06					58.6117	0.000215069
			58.6517	1.522e-06					58.6517	0.000214227
			58.6917	1.5133e-06					58.6917	0.000213389
			58.7317	1.50465e-06					58.7317	0.000212554
			58.7718	1.49606e-06					58.7718	0.000211723
			58.8118	1.48751e-06					58.8118	0.000210895
			58.8518	1.47902e-06					58.8518	0.000210071
			58.8918	1.47058e-06					58.8918	0.00020925
			58.9318	1.46219e-06					58.9318	0.000208433
			58.9718	1.45386e-06					58.9718	0.00020762
			59.0118	1.44557e-06					59.0118	0.000206809
			59.0518	1.43734e-06					59.0518	0.000206003
			59.0918	1.42916e-06					59.0918	0.000205199
			59.1318	1.42102e-06					59.1318	0.000204399
			59.1718	1.41294e-06					59.1718	0.000203603
			59.2118	1.4049e-06					59.2118	0.00020281
			59.2519	1.39692e-06					59.2519	0.00020202
			59.2919	1.38898e-06					59.2919	0.000201233
			59.3319	1.3811e-06					59.3319	0.00020045
			59.3719	1.37326e-06					59.3719	0.00019967
			59.4119	1.36546e-06					59.4119	0.000198894
			59.4519	1.35772e-06					59.4519	0.00019812
			59.4919	1.35002e-06					59.4919	0.000197351
			59.5319	1.34237e-06					59.5319	0.000196584
			59.5719	1.33477e-06					59.5719	0.00019582
			59.6119	1.32721e-06					59.6119	0.00019506
			59.6519	1.3197e-06					59.6519	0.000194303
			59.6919	1.31223e-06					59.6919	0.000193549
			59.7319	1.30481e-06					59.7319	0.000192799
			59.772	1.29744e-06					59.772	0.000192051
			59.812	1.29011e-06					59.812	0.000191307
			59.852	1.28282e-06					59.852	0.000190566
			59.892	1.27558e-06					59.892	0.000189827
			59.932	1.26838e-06					59.932	0.000189092
			59.972	1.26123e-06					59.972	0.000188361
			60.012	1.25412e-06					60.012	0.000187632
			60.052	1.24705e-06					60.052	0.000186906
			60.092	1.24003e-06					60.092	0.000186183
			60.132	1.23304e-06					60.132	0.000185464
			60.172	1.2261e-06					60.172	0.000184747
			60.212	1.21921e-06					60.212	0.000184034
			60.2521	1.21235e-06					60.2521	0.000183323
			60.2921	1.20553e-06					60.2921	0.000182615
			60.3321	1.19876e-06					60.3321	0.000181911
			60.3721	1.19203e-06					60.3721	0.000181209
			60.4121	1.18534e-06					60.4121	0.00018051
			60.4521	1.17868e-06					60.4521	0.000179814
			60.4921	1.17207e-06					60.4921	0.000179122
			60.5321	1.1655e-06					60.5321	0.000178432
			60.5721	1.15897e-06					60.5721	0.000177744
			60.6121	1.15248e-06					60.6121	0.00017706
			60.6521	1.14602e-06					60.6521	0.000176379
			60.6921	1.13961e-06					60.6921	0.0001757
			60.7321	1.13323e-06					60.7321	0.000175025
			60.7722	1.12689e-06					60.7722	0.000174352
			60.8122	1.12059e-06					60.8122	0.000173682
			60.8522	1.11433e-06					60.8522	0.000173015
			60.8922	1.10811e-06					60.8922	0.00017235
			60.9322	1.10192e-06					60.9322	0.000171689
			60.9722	1.09577e-06					60.9722	0.00017103
			61.0122	1.08966e-06					61.0122	0.000170374
			61.0522	1.08358e-06					61.0522	0.00016972
			61.0922	1.07754e-06					61.0922	0.000169069
			61.1322	1.07154e-06					61.1322	0.000168422
			61.1722	1.06557e-06					61.1722	0.000167776
			61.2122	1.05964e-06					61.2122	0.000167134
			61.2523	1.05374e-06					61.2523	0.000166494
			61.2923	1.04788e-06					61.2923	0.000165857
			61.3323	1.04205e-06					61.3323	0.000165222
			61.3723	1.03626e-06					61.3723	0.00016459
			61.4123	1.03051e-06					61.4123	0.000163961
			61.4523	1.02478e-06					61.4523	0.000163334
			61.4923	1.01909e-06					61.4923	0.00016271
			61.5323	1.01344e-06					61.5323	0.000162088
			61.5723	1.00782e-06					61.5723	0.00016147
			61.6123	1.00223e-06					61.6123	0.000160853
			61.6523	9.96678e-07					61.6523	0.000160239
			61.6923	9.91157e-07					61.6923	0.000159628
			61.7323	9.85669e-07					61.7323	0.000159019
			61.7724	9.80214e-07					61.7724	0.000158413
			61.8124	9.74791e-07					61.8124	0.00015781
			61.8524	9.694e-07					61.8524	0.000157208
			61.8924	9.64042e-07					61.8924	0.00015661
			61.9324	9.58715e-07					61.9324	0.000156014
			61.9724	9.5342e-07					61.9724	0.00015542
			62.0124	9.48156e-07					62.0124	0.000154829
			62.0524	9.42923e-07					62.0524	0.00015424
			62.0924	9.37722e-07					62.0924	0.000153653
			62.1324	9.32551e-07					62.1324	0.000153069
			62.1724	9.27411e-07					62.1724	0.000152488
			62.2124	9.22302e-07					62.2124	0.000151909
			62.2525	9.17222e-07					62.2525	0.000151332
			62.2925	9.12173e-07					62.2925	0.000150758
			62.3325	9.07154e-07					62.3325	0.000150186
			62.3725	9.02164e-07					62.3725	0.000149616
			62.4125	8.97204e-07					62.4125	0.000149049
			62.4525	8.92273e-07					62.4525	0.000148484
			62.4925	8.87371e-07					62.4925	0.000147921
			62.5325	8.82498e-07					62.5325	0.000147361
			62.5725	8.77654e-07					62.5725	0.000146803
			62.6125	8.72838e-07					62.6125	0.000146247
			62.6525	8.68051e-07					62.6525	0.000145694
			62.6925	8.63292e-07					62.6925	0.000145143
			62.7325	8.58561e-07					62.7325	0.000144594
			62.7726	8.53858e-07					62.7726	0.000144047
			62.8126	8.49183e-07					62.8126	0.000143503
			62.8526	8.44535e-07					62.8526	0.000142961
			62.8926	8.39914e-07					62.8926	0.000142421
			62.9326	8.35321e-07					62.9326	0.000141883
			62.9726	8.30755e-07					62.9726	0.000141348
			63.0126	8.26215e-07					63.0126	0.000140815
			63.0526	8.21702e-07					63.0526	0.000140283
			63.0926	8.17216e-07					63.0926	0.000139755
			63.1326	8.12755e-07					63.1326	0.000139228
			63.1726	8.08321e-07					63.1726	0.000138703
			63.2126	8.03913e-07					63.2126	0.000138181
			63.2527	7.99531e-07					63.2527	0.000137661
			63.2927	7.95175e-07					63.2927	0.000137142
			63.3327	7.90844e-07					63.3327	0.000136626
			63.3727	7.86538e-07					63.3727	0.000136112
			63.4127	7.82258e-07					63.4127	0.000135601
			63.4527	7.78002e-07					63.4527	0.000135091
			63.4927	7.73771e-07					63.4927	0.000134583
			63.5327	7.69566e-07					63.5327	0.000134078
			63.5727	7.65384e-07					63.5727	0.000133574
			63.6127	7.61227e-07					63.6127	0.000133073
			63.6527	7.57095e-07					63.6527	0.000132573
			63.6927	7.52986e-07					63.6927	0.000132076
			63.7327	7.48901e-07					63.7327	0.000131581
			63.7728	7.44841e-07					63.7728	0.000131087
			63.8128	7.40803e-07					63.8128	0.000130596
			63.8528	7.3679e-07					63.8528	0.000130107
			63.8928	7.32799e-07					63.8928	0.00012962
			63.9328	7.28832e-07					63.9328	0.000129134
			63.9728	7.24888e-07					63.9728	0.000128651
			64.0128	7.20967e-07					64.0128	0.00012817
			64.0528	7.17069e-07					64.0528	0.00012769
			64.0928	7.13193e-07					64.0928	0.000127213
			64.1328	7.0934e-07					64.1328	0.000126737
			64.1728	7.05509e-07					64.1728	0.000126264
			64.2128	7.01701e-07					64.2128	0.000125792
			64.2529	6.97914e-07					64.2529	0.000125322
			64.2929	6.9415e-07					64.2929	0.000124854
			64.3329	6.90407e-07					64.3329	0.000124388
			64.3729	6.86686e-07					64.3729	0.000123924
			64.4129	6.82986e-07					64.4129	0.000123462
			64.4529	6.79308e-07					64.4529	0.000123002
			64.4929	6.75651e-07					64.4929	0.000122544
			64.5329	6.72016e-07					64.5329	0.000122087
			64.5729	6.68401e-07					64.5729	0.000121632
			64.6129	6.64807e-07					64.6129	0.000121179
			64.6529	6.61234e-07					64.6529	0.000120728
			64.6929	6.57682e-07					64.6929	0.000120279
			64.7329	6.5415e-07					64.7329	0.000119832
			64.773	6.50638e-07					64.773	0.000119386
			64.813	6.47147e-07					64.813	0.000118942
			64.853	6.43676e-07					64.853	0.0001185
			64.893	6.40224e-07					64.893	0.00011806
			64.933	6.36793e-07					64.933	0.000117622
			64.973	6.33382e-07					64.973	0.000117185
			65.013	6.2999e-07					65.013	0.00011675
			65.053	6.26617e-07					65.053	0.000116317
			65.093	6.23264e-07					65.093	0.000115886
			65.133	6.1993e-07					65.133	0.000115456
			65.173	6.16616e-07					65.173	0.000115028
			65.213	6.1332e-07					65.213	0.000114602
			65.2531	6.10044e-07					65.2531	0.000114177
			65.2931	6.06786e-07					65.2931	0.000113755
			65.3331	6.03546e-07					65.3331	0.000113334
			65.3731	6.00326e-07					65.3731	0.000112914
			65.4131	5.97124e-07					65.4131	0.000112497
			65.4531	5.9394e-07					65.4531	0.000112081
			65.4931	5.90774e-07					65.4931	0.000111666
			65.5331	5.87627e-07					65.5331	0.000111254
			65.5731	5.84497e-07					65.5731	0.000110843
			65.6131	5.81386e-07					65.6131	0.000110433
			65.6531	5.78292e-07					65.6531	0.000110026
			65.6931	5.75216e-07					65.6931	0.000109619
			65.7331	5.72157e-07					65.7331	0.000109215
			65.7732	5.69116e-07					65.7732	0.000108812
			65.8132	5.66093e-07					65.8132	0.000108411
			65.8532	5.63086e-07					65.8532	0.000108011
			65.8932	5.60097e-07					65.8932	0.000107613
			65.9332	5.57125e-07					65.9332	0.000107217
			65.9732	5.54169e-07					65.9732	0.000106822
			66.0132	5.51231e-07					66.0132	0.000106429
			66.0532	5.48309e-07					66.0532	0.000106037
			66.0932	5.45404e-07					66.0932	0.000105647
			66.1332	5.42515e-07					66.1332	0.000105259
			66.1732	5.39643e-07					66.1732	0.000104872
			66.2132	5.36787e-07					66.2132	0.000104486
			66.2533	5.33947e-07					66.2533	0.000104102
			66.2933	5.31124e-07					66.2933	0.00010372
			66.3333	5.28317e-07					66.3333	0.000103339
			66.3733	5.25525e-07					66.3733	0.00010296
			66.4133	5.22749e-07					66.4133	0.000102582
			66.4533	5.19989e-07					66.4533	0.000102206
			66.4933	5.17245e-07					66.4933	0.000101831
			66.5333	5.14516e-07					66.5333	0.000101458
			66.5733	5.11803e-07					66.5733	0.000101086
			66.6133	5.09105e-07					66.6133	0.000100716
			66.6533	5.06422e-07					66.6533	0.000100347
			66.6933	5.03755e-07					66.6933	9.99795e-05
			66.7333	5.01102e-07					66.7333	9.96136e-05
			66.7734	4.98465e-07					66.7734	9.92492e-05
			66.8134	4.95843e-07					66.8134	9.88862e-05
			66.8534	4.93235e-07					66.8534	9.85246e-05
			66.8934	4.90642e-07					66.8934	9.81645e-05
			66.9334	4.88064e-07					66.9334	9.78058e-05
			66.9734	4.855e-07					66.9734	9.74485e-05
			67.0134	4.8295e-07					67.0134	9.70927e-05
			67.0534	4.80415e-07					67.0534	9.67382e-05
			67.0934	4.77895e-07					67.0934	9.63852e-05
			67.1334	4.75388e-07					67.1334	9.60336e-05
			67.1734	4.72896e-07					67.1734	9.56834e-05
			67.2134	4.70418e-07					67.2134	9.53345e-05
			67.2535	4.67953e-07					67.2535	9.49871e-05
			67.2935	4.65503e-07					67.2935	9.4641e-05
			67.3335	4.63066e-07					67.3335	9.42963e-05
			67.3735	4.60643e-07					67.3735	9.39529e-05
			67.4135	4.58233e-07					67.4135	9.36109e-05
			67.4535	4.55838e-07					67.4535	9.32703e-05
			67.4935	4.53455e-07					67.4935	9.2931e-05
			67.5335	4.51086e-07					67.5335	9.25931e-05
			67.5735	4.4873e-07					67.5735	9.22565e-05
			67.6135	4.46388e-07					67.6135	9.19212e-05
			67.6535	4.44058e-07					67.6535	9.15872e-05
			67.6935	4.41742e-07					67.6935	9.12546e-05
			67.7335	4.39438e-07					67.7335	9.09233e-05
			67.7736	4.37148e-07					67.7736	9.05933e-05
			67.8136	4.3487e-07					67.8136	9.02646e-05
			67.8536	4.32605e-07					67.8536	8.99371e-05
			67.8936	4.30353e-07					67.8936	8.9611e-05
			67.9336	4.28113e-07					67.9336	8.92862e-05
			67.9736	4.25886e-07					67.9736	8.89626e-05
			68.0136	4.23671e-07					68.0136	8.86404e-05
			68.0536	4.21468e-07					68.0536	8.83193e-05
			68.0936	4.19278e-07					68.0936	8.79996e-05
			68.1336	4.171e-07					68.1336	8.76811e-05
			68.1736	4.14935e-07					68.1736	8.73639e-05
			68.2136	4.12781e-07					68.2136	8.70479e-05
			68.2537	4.10639e-07					68.2537	8.67331e-05
			68.2937	4.08509e-07					68.2937	8.64196e-05
			68.3337	4.06391e-07					68.3337	8.61074e-05
			68.3737	4.04285e-07					68.3737	8.57963e-05
			68.4137	4.02191e-07					68.4137	8.54865e-05
			68.4537	4.00108e-07					68.4537	8.51779e-05
			68.4937	3.98037e-07					68.4937	8.48705e-05
			68.5337	3.95977e-07					68.5337	8.45643e-05
			68.5737	3.93929e-07					68.5737	8.42593e-05
			68.6137	3.91892e-07					68.6137	8.39555e-05
			68.6537	3.89866e-07					68.6537	8.36529e-05
			68.6937	3.87852e-07					68.6937	8.33515e-05
			68.7337	3.85849e-07					68.7337	8.30512e-05
			68.7738	3.83857e-07					68.7738	8.27522e-05
			68.8138	3.81876e-07					68.8138	8.24543e-05
			68.8538	3.79906e-07					68.8538	8.21576e-05
			68.8938	3.77947e-07					68.8938	8.1862e-05
			68.9338	3.75998e-07					68.9338	8.15676e-05
			68.9738	3.74061e-07					68.9738	8.12743e-05
			69.0138	3.72134e-07					69.0138	8.09822e-05
			69.0538	3.70218e-07					69.0538	8.06912e-05
			69.0938	3.68312e-07					69.0938	8.04014e-05
			69.1338	3.66417e-07					69.1338	8.01127e-05
			69.1738	3.64533e-07					69.1738	7.98251e-05
			69.2138	3.62659e-07					69.2138	7.95387e-05
			69.2539	3.60795e-07					69.2539	7.92534e-05
			69.2939	3.58941e-07					69.2939	7.89691e-05
			69.3339	3.57098e-07					69.3339	7.8686e-05
			69.3739	3.55265e-07					69.3739	7.8404e-05
			69.4139	3.53442e-07					69.4139	7.81231e-05
			69.4539	3.51629e-07					69.4539	7.78433e-05
			69.4939	3.49826e-07					69.4939	7.75646e-05
			69.5339	3.48032e-07					69.5339	7.72869e-05
			69.5739	3.46249e-07					69.5739	7.70103e-05
			69.6139	3.44476e-07					69.6139	7.67349e-05
			69.6539	3.42712e-07					69.6539	7.64604e-05
			69.6939	3.40958e-07					69.6939	7.61871e-05
			69.7339	3.39214e-07					69.7339	7.59148e-05
			69.774	3.37479e-07					69.774	7.56436e-05
			69.814	3.35754e-07					69.814	7.53734e-05
			69.854	3.34038e-07					69.854	7.51043e-05
			69.894	3.32331e-07					69.894	7.48362e-05
			69.934	3.30634e-07					69.934	7.45692e-05
			69.974	3.28947e-07					69.974	7.43032e-05
			70.014	3.27268e-07					70.014	7.40382e-05
			70.054	3.25599e-07					70.054	7.37742e-05
			70.094	3.23939e-07					70.094	7.35113e-05
			70.134	3.22287e-07					70.134	7.32494e-05
			70.174	3.20645e-07					70.174	7.29885e-05
			70.214	3.19012e-07					70.214	7.27287e-05
			70.2541	3.17388e-07					70.2541	7.24698e-05
			70.2941	3.15773e-07					70.2941	7.22119e-05
			70.3341	3.14166e-07					70.3341	7.1955e-05
			70.3741	3.12569e-07					70.3741	7.16992e-05
			70.4141	3.1098e-07					70.4141	7.14443e-05
			70.4541	3.09399e-07					70.4541	7.11904e-05
			70.4941	3.07828e-07					70.4941	7.09374e-05
			70.5341	3.06265e-07					70.5341	7.06855e-05
			70.5741	3.0471e-07					70.5741	7.04345e-05
			70.6141	3.03164e-07					70.6141	7.01845e-05
			70.6541	3.01626e-07					70.6541	6.99355e-05
			70.6941	3.00097e-07					70.6941	6.96874e-05
			70.7341	2.98576e-07					70.7341	6.94402e-05
			70.7742	2.97063e-07					70.7742	6.91941e-05
			70.8142	2.95558e-07					70.8142	6.89488e-05
			70.8542	2.94062e-07					70.8542	6.87046e-05
			70.8942	2.92574e-07					70.8942	6.84612e-05
			70.9342	2.91094e-07					70.9342	6.82188e-05
			70.9742	2.89621e-07					70.9742	6.79774e-05
			71.0142	2.88157e-07					71.0142	6.77368e-05
			71.0542	2.86701e-07					71.0542	6.74972e-05
			71.0942	2.85253e-07					71.0942	6.72585e-05
			71.1342	2.83812e-07					71.1342	6.70207e-05
			71.1742	2.8238e-07					71.1742	6.67839e-05
			71.2142	2.80955e-07					71.2142	6.65479e-05
			71.2543	2.79538e-07					71.2543	6.63129e-05
			71.2943	2.78128e-07					71.2943	6.60787e-05
			71.3343	2.76726e-07					71.3343	6.58455e-05
			71.3743	2.75332e-07					71.3743	6.56131e-05
			71.4143	2.73945e-07					71.4143	6.53817e-05
			71.4543	2.72566e-07					71.4543	6.51511e-05
			71.4943	2.71194e-07					71.4943	6.49214e-05
			71.5343	2.6983e-07					71.5343	6.46926e-05
			71.5743	2.68473e-07					71.5743	6.44647e-05
			71.6143	2.67123e-07					71.6143	6.42376e-05
			71.6543	2.65781e-07					71.6543	6.40114e-05
			71.6943	2.64445e-07					71.6943	6.37861e-05
			71.7343	2.63117e-07					71.7343	6.35616e-05
			71.7744	2.61797e-07					71.7744	6.3338e-05
			71.8144	2.60483e-07					71.8144	6.31153e-05
			71.8544	2.59176e-07					71.8544	6.28934e-05
			71.8944	2.57877e-07					71.8944	6.26724e-05
			71.9344	2.56584e-07					71.9344	6.24522e-05
			71.9744	2.55298e-07					71.9744	6.22328e-05
			72.0144	2.54019e-07					72.0144	6.20143e-05
			72.0544	2.52748e-07					72.0544	6.17966e-05
			72.0944	2.51482e-07					72.0944	6.15797e-05
			72.1344	2.50224e-07					72.1344	6.13637e-05
			72.1744	2.48973e-07					72.1744	6.11485e-05
			72.2144	2.47728e-07					72.2144	6.09341e-05
			72.2545	2.4649e-07					72.2545	6.07205e-05
			72.2945	2.45258e-07					72.2945	6.05077e-05
			72.3345	2.44033e-07					72.3345	6.02958e-05
			72.3745	2.42815e-07					72.3745	6.00847e-05
			72.4145	2.41603e-07					72.4145	5.98743e-05
			72.4545	2.40398e-07					72.4545	5.96648e-05
			72.4945	2.39199e-07					72.4945	5.9456e-05
			72.5345	2.38006e-07					72.5345	5.92481e-05
			72.5745	2.3682e-07					72.5745	5.90409e-05
			72.6145	2.35641e-07					72.6145	5.88346e-05
			72.6545	2.34467e-07					72.6545	5.8629e-05
			72.6945	2.333e-07					72.6945	5.84242e-05
			72.7345	2.32139e-07					72.7345	5.82202e-05
			72.7746	2.30984e-07					72.7746	5.80169e-05
			72.8146	2.29836e-07					72.8146	5.78144e-05
			72.8546	2.28693e-07					72.8546	5.76127e-05
			72.8946	2.27557e-07					72.8946	5.74118e-05
			72.9346	2.26427e-07					72.9346	5.72116e-05
			72.9746	2.25302e-07					72.9746	5.70121e-05
			73.0146	2.24184e-07					73.0146	5.68135e-05
			73.0546	2.23072e-07					73.0546	5.66156e-05
			73.0946	2.21965e-07					73.0946	5.64184e-05
			73.1346	2.20865e-07					73.1346	5.6222e-05
			73.1746	2.1977e-07					73.1746	5.60263e-05
			73.2146	2.18681e-07					73.2146	5.58313e-05
			73.2547	2.17598e-07					73.2547	5.56371e-05
			73.2947	2.16521e-07					73.2947	5.54437e-05
			73.3347	2.15449e-07					73.3347	5.52509e-05
			73.3747	2.14383e-07					73.3747	5.50589e-05
			73.4147	2.13323e-07					73.4147	5.48676e-05
			73.4547	2.12268e-07					73.4547	5.46771e-05
			73.4947	2.11219e-07					73.4947	5.44872e-05
			73.5347	2.10176e-07					73.5347	5.42981e-05
			73.5747	2.09138e-07					73.5747	5.41097e-05
			73.6147	2.08106e-07					73.6147	5.3922e-05
			73.6547	2.07079e-07					73.6547	5.3735e-05
			73.6947	2.06057e-07					73.6947	5.35487e-05
			73.7347	2.05041e-07					73.7347	5.33631e-05
			73.7748	2.0403e-07					73.7748	5.31782e-05
			73.8148	2.03025e-07					73.8148	5.2994e-05
			73.8548	2.02025e-07					73.8548	5.28105e-05
			73.8948	2.0103e-07					73.8948	5.26277e-05
			73.9348	2.0004e-07					73.9348	5.24456e-05
			73.9748	1.99056e-07					73.9748	5.22641e-05
			74.0148	1.98077e-07					74.0148	5.20834e-05
			74.0548	1.97103e-07					74.0548	5.19033e-05
			74.0948	1.96134e-07					74.0948	5.17239e-05
			74.1348	1.9517e-07					74.1348	5.15452e-05
			74.1748	1.94211e-07					74.1748	5.13671e-05
			74.2148	1.93258e-07					74.2148	5.11897e-05
			74.2549	1.92309e-07					74.2549	5.1013e-05
			74.2949	1.91366e-07					74.2949	5.0837e-05
			74.3349	1.90427e-07					74.3349	5.06616e-05
			74.3749	1.89493e-07					74.3749	5.04868e-05
			74.4149	1.88564e-07					74.4149	5.03127e-05
			74.4549	1.8764e-07					74.4549	5.01393e-05
			74.4949	1.86721e-07					74.4949	4.99665e-05
			74.5349	1.85807e-07					74.5349	4.97944e-05
			74.5749	1.84898e-07					74.5749	4.96229e-05
			74.6149	1.83993e-07					74.6149	4.94521e-05
			74.6549	1.83093e-07					74.6549	4.92818e-05
			74.6949	1.82198e-07					74.6949	4.91123e-05
			74.7349	1.81307e-07					74.7349	4.89433e-05
			74.775	1.80422e-07					74.775	4.8775e-05
			74.815	1.7954e-07					74.815	4.86073e-05
			74.855	1.78664e-07					74.855	4.84403e-05
			74.895	1.77792e-07					74.895	4.82739e-05
			74.935	1.76924e-07					74.935	4.81081e-05
			74.975	1.76062e-07					74.975	4.79429e-05
			75.015	1.75203e-07					75.015	4.77783e-05
			75.055	1.74349e-07					75.055	4.76143e-05
			75.095	1.735e-07					75.095	4.7451e-05
			75.135	1.72655e-07					75.135	4.72882e-05
			75.175	1.71814e-07					75.175	4.71261e-05
			75.215	1.70978e-07					75.215	4.69646e-05
			75.2551	1.70146e-07					75.2551	4.68037e-05
			75.2951	1.69319e-07					75.2951	4.66433e-05
			75.3351	1.68496e-07					75.3351	4.64836e-05
			75.3751	1.67677e-07					75.3751	4.63245e-05
			75.4151	1.66862e-07					75.4151	4.61659e-05
			75.4551	1.66052e-07					75.4551	4.6008e-05
			75.4951	1.65246e-07					75.4951	4.58506e-05
			75.5351	1.64444e-07					75.5351	4.56938e-05
			75.5751	1.63646e-07					75.5751	4.55376e-05
			75.6151	1.62852e-07					75.6151	4.5382e-05
			75.6551	1.62063e-07					75.6551	4.5227e-05
			75.6951	1.61278e-07					75.6951	4.50725e-05
			75.7351	1.60496e-07					75.7351	4.49186e-05
			75.7752	1.59719e-07					75.7752	4.47653e-05
			75.8152	1.58946e-07					75.8152	4.46125e-05
			75.8552	1.58177e-07					75.8552	4.44603e-05
			75.8952	1.57411e-07					75.8952	4.43087e-05
			75.9352	1.5665e-07					75.9352	4.41576e-05
			75.9752	1.55893e-07					75.9752	4.40071e-05
			76.0152	1.55139e-07					76.0152	4.38572e-05
			76.0552	1.5439e-07					76.0552	4.37078e-05
			76.0952	1.53644e-07					76.0952	4.3559e-05
			76.1352	1.52903e-07					76.1352	4.34107e-05
			76.1752	1.52165e-07					76.1752	4.32629e-05
			76.2152	1.51431e-07					76.2152	4.31158e-05
			76.2553	1.507e-07					76.2553	4.29691e-05
			76.2953	1.49974e-07					76.2953	4.2823e-05
			76.3353	1.49251e-07					76.3353	4.26774e-05
			76.3753	1.48532e-07					76.3753	4.25324e-05
			76.4153	1.47817e-07					76.4153	4.23879e-05
			76.4553	1.47105e-07					76.4553	4.2244e-05
			76.4953	1.46397e-07					76.4953	4.21005e-05
			76.5353	1.45693e-07					76.5353	4.19576e-05
			76.5753	1.44992e-07					76.5753	4.18153e-05
			76.6153	1.44295e-07					76.6153	4.16734e-05
			76.6553	1.43602e-07					76.6553	4.15321e-05
			76.6953	1.42912e-07					76.6953	4.13913e-05
			76.7353	1.42226e-07					76.7353	4.1251e-05
			76.7754	1.41543e-07					76.7754	4.11112e-05
			76.8154	1.40864e-07					76.8154	4.0972e-05
			76.8554	1.40188e-07					76.8554	4.08332e-05
			76.8954	1.39516e-07					76.8954	4.0695e-05
			76.9354	1.38847e-07					76.9354	4.05573e-05
			76.9754	1.38181e-07					76.9754	4.04201e-05
			77.0154	1.37519e-07					77.0154	4.02834e-05
			77.0554	1.36861e-07					77.0554	4.01471e-05
			77.0954	1.36206e-07					77.0954	4.00114e-05
			77.1354	1.35554e-07					77.1354	3.98762e-05
			77.1754	1.34905e-07					77.1754	3.97415e-05
			77.2154	1.3426e-07					77.2154	3.96073e-05
			77.2555	1.33618e-07					77.2555	3.94736e-05
			77.2955	1.3298e-07					77.2955	3.93403e-05
			77.3355	1.32344e-07					77.3355	3.92076e-05
			77.3755	1.31712e-07					77.3755	3.90753e-05
			77.4155	1.31083e-07					77.4155	3.89435e-05
			77.4555	1.30458e-07					77.4555	3.88122e-05
			77.4955	1.29835e-07					77.4955	3.86814e-05
			77.5355	1.29216e-07					77.5355	3.85511e-05
			77.5755	1.286e-07					77.5755	3.84212e-05
			77.6155	1.27987e-07					77.6155	3.82918e-05
			77.6555	1.27378e-07					77.6555	3.81629e-05
			77.6955	1.26771e-07					77.6955	3.80345e-05
			77.7355	1.26167e-07					77.7355	3.79065e-05
			77.7756	1.25567e-07					77.7756	3.7779e-05
			77.8156	1.24969e-07					77.8156	3.7652e-05
			77.8556	1.24375e-07					77.8556	3.75254e-05
			77.8956	1.23784e-07					77.8956	3.73993e-05
			77.9356	1.23195e-07					77.9356	3.72737e-05
			77.9756	1.2261e-07					77.9756	3.71485e-05
			78.0156	1.22028e-07					78.0156	3.70237e-05
			78.0556	1.21448e-07					78.0556	3.68995e-05
			78.0956	1.20872e-07					78.0956	3.67756e-05
			78.1356	1.20298e-07					78.1356	3.66523e-05
			78.1756	1.19728e-07					78.1756	3.65293e-05
			78.2156	1.1916e-07					78.2156	3.64069e-05
			78.2557	1.18595e-07					78.2557	3.62848e-05
			78.2957	1.18033e-07					78.2957	3.61633e-05
			78.3357	1.17474e-07					78.3357	3.60421e-05
			78.3757	1.16918e-07					78.3757	3.59214e-05
			78.4157	1.16365e-07					78.4157	3.58011e-05
			78.4557	1.15814e-07					78.4557	3.56813e-05
			78.4957	1.15266e-07					78.4957	3.55619e-05
			78.5357	1.14721e-07					78.5357	3.5443e-05
			78.5757	1.14179e-07					78.5757	3.53245e-05
			78.6157	1.13639e-07					78.6157	3.52064e-05
			78.6557	1.13103e-07					78.6557	3.50887e-05
			78.6957	1.12568e-07					78.6957	3.49715e-05
			78.7357	1.12037e-07					78.7357	3.48546e-05
			78.7758	1.11508e-07					78.7758	3.47383e-05
			78.8158	1.10982e-07					78.8158	3.46223e-05
			78.8558	1.10459e-07					78.8558	3.45067e-05
			78.8958	1.09938e-07					78.8958	3.43916e-05
			78.9358	1.0942e-07					78.9358	3.42769e-05
			78.9758	1.08905e-07					78.9758	3.41626e-05
			79.0158	1.08392e-07					79.0158	3.40487e-05
			79.0558	1.07882e-07					79.0558	3.39353e-05
			79.0958	1.07374e-07					79.0958	3.38222e-05
			79.1358	1.06869e-07					79.1358	3.37096e-05
			79.1758	1.06366e-07					79.1758	3.35973e-05
			79.2158	1.05866e-07					79.2158	3.34855e-05
			79.2559	1.05369e-07					79.2559	3.33741e-05
			79.2959	1.04874e-07					79.2959	3.3263e-05
			79.3359	1.04381e-07					79.3359	3.31524e-05
			79.3759	1.03891e-07					79.3759	3.30422e-05
			79.4159	1.03403e-07					79.4159	3.29323e-05
			79.4559	1.02918e-07					79.4559	3.28229e-05
			79.4959	1.02436e-07					79.4959	3.27139e-05
			79.5359	1.01955e-07					79.5359	3.26052e-05
			79.5759	1.01477e-07					79.5759	3.2497e-05
			79.6159	1.01002e-07					79.6159	3.23891e-05
			79.6559	1.00529e-07					79.6559	3.22816e-05
			79.6959	1.00058e-07					79.6959	3.21746e-05
			79.7359	9.95898e-08					79.7359	3.20679e-05
			79.776	9.91238e-08					79.776	3.19615e-05
			79.816	9.86602e-08					79.816	3.18556e-05
			79.856	9.81989e-08					79.856	3.17501e-05
			79.896	9.77398e-08					79.896	3.16449e-05
			79.936	9.72831e-08					79.936	3.15401e-05
[truncated: 3,001 more rows]

## Sheet: 5b
$B_0$ [mT]	M80, momentfit		$B_0$ [mT]	M80, V2	LData	UData		$B_0$ [mT]	M100, momentfit		$B_0$ [mT]	M100, V2	LData	UData
0	0		0.352631	0.000350807	2.3516e-05	2.3516e-05		0	0		0.352631	0.00134665	7.37888e-06	7.37888e-06
0.0743136	1.77155e-05		0.707799	0.00119218	2.46044e-05	2.46044e-05		0.0743136	8.42651e-05		0.707799	0.00342357	1.29203e-05	1.29203e-05
0.148627	6.96921e-05		1.06043	0.0021358	2.68861e-05	2.68861e-05		0.148627	0.000314677		1.06043	0.00503089	9.7708e-06	9.7708e-06
0.222941	0.000152926		1.4156	0.00305905	2.90253e-05	2.90253e-05		0.222941	0.00064772		1.4156	0.00616263	8.30972e-06	8.30972e-06
0.297254	0.000263442		2.12086	0.00460547	3.56828e-05	3.56828e-05		0.297254	0.00104363		2.12086	0.00749361	2.65818e-05	2.65818e-05
0.371568	0.000396978		2.82866	0.00573683	3.97189e-05	3.97189e-05		0.371568	0.00147251		2.82866	0.00811259	3.53922e-05	3.53922e-05
0.445882	0.000549394		3.53646	0.00656675	2.75691e-05	2.75691e-05		0.445882	0.0019135		3.53646	0.00835909	2.04421e-05	2.04421e-05
0.520195	0.000716884		4.24172	0.00712996	2.8706e-05	2.8706e-05		0.520195	0.00235266		4.24172	0.00840987	4.45815e-05	4.45815e-05
0.594509	0.000896067		4.95205	0.0075445	2.03793e-05	2.03793e-05		0.594509	0.00278092		4.95205	0.00834112	3.01871e-05	3.01871e-05
0.668822	0.001084		5.65985	0.00780091	3.18166e-05	3.18166e-05		0.668822	0.00319264		5.65985	0.00819844	3.0781e-05	3.0781e-05
0.743136	0.00127818		6.36511	0.0079419	2.95207e-05	2.95207e-05		0.743136	0.00358452		6.36511	0.00804317	2.21547e-05	2.21547e-05
0.81745	0.00147646		7.07291	0.00806737	1.60105e-05	1.60105e-05		0.81745	0.00395485		7.07291	0.00787184	2.90178e-05	2.90178e-05
0.891763	0.00167706		7.35705	0.00810492	2.78996e-05	2.78996e-05		0.891763	0.00430298		7.35705	0.00777166	2.32907e-05	2.32907e-05
0.966077	0.00187849							0.966077	0.00462896
1.04039	0.00207953							1.04039	0.00493329
1.1147	0.00227917							1.1147	0.00521678
1.18902	0.00247658							1.18902	0.0054804
1.26333	0.0026711							1.26333	0.0057252
1.33764	0.00286222							1.33764	0.00595229
1.41196	0.00304951							1.41196	0.00616274
1.48627	0.00323266							1.48627	0.00635764
1.56059	0.00341143							1.56059	0.00653802
1.6349	0.00358563							1.6349	0.00670485
1.70921	0.00375517							1.70921	0.00685907
1.78353	0.00391995							1.78353	0.00700154
1.85784	0.00407996							1.85784	0.0071331
1.93215	0.00423517							1.93215	0.00725449
2.00647	0.00438563							2.00647	0.00736643
2.08078	0.00453136							2.08078	0.00746958
2.15509	0.00467243							2.15509	0.00756456
2.22941	0.00480892							2.22941	0.00765192
2.30372	0.00494091							2.30372	0.0077322
2.37804	0.00506849							2.37804	0.00780589
2.45235	0.00519175							2.45235	0.00787343
2.52666	0.00531082							2.52666	0.00793525
2.60098	0.00542578							2.60098	0.00799173
2.67529	0.00553676							2.67529	0.00804324
2.7496	0.00564386							2.7496	0.0080901
2.82392	0.00574719							2.82392	0.00813264
2.89823	0.00584687							2.89823	0.00817113
2.97254	0.005943							2.97254	0.00820584
3.04686	0.0060357							3.04686	0.00823703
3.12117	0.00612507							3.12117	0.00826491
3.19549	0.00621122							3.19549	0.00828971
3.2698	0.00629424							3.2698	0.00831162
3.34411	0.00637425							3.34411	0.00833083
3.41843	0.00645133							3.41843	0.00834752
3.49274	0.00652559							3.49274	0.00836183
3.56705	0.00659712							3.56705	0.00837393
3.64137	0.00666601							3.64137	0.00838395
3.71568	0.00673234							3.71568	0.00839202
3.78999	0.00679621							3.78999	0.00839827
3.86431	0.00685769							3.86431	0.00840281
3.93862	0.00691687							3.93862	0.00840574
4.01293	0.00697382							4.01293	0.00840717
4.08725	0.00702862							4.08725	0.00840719
4.16156	0.00708134							4.16156	0.00840589
4.23588	0.00713204							4.23588	0.00840334
4.31019	0.00718081							4.31019	0.00839963
4.3845	0.00722771							4.3845	0.00839482
4.45882	0.00727278							4.45882	0.00838899
4.53313	0.00731611							4.53313	0.00838219
4.60744	0.00735774							4.60744	0.0083745
4.68176	0.00739774							4.68176	0.00836595
4.75607	0.00743615							4.75607	0.00835661
4.83038	0.00747304							4.83038	0.00834653
4.9047	0.00750845							4.9047	0.00833574
4.97901	0.00754243							4.97901	0.0083243
5.05333	0.00757503							5.05333	0.00831225
5.12764	0.00760629							5.12764	0.00829962
5.20195	0.00763626							5.20195	0.00828645
5.27627	0.00766498							5.27627	0.00827278
5.35058	0.00769249							5.35058	0.00825864
5.42489	0.00771884							5.42489	0.00824405
5.49921	0.00774406							5.49921	0.00822905
5.57352	0.00776818							5.57352	0.00821366
5.64783	0.00779124							5.64783	0.00819791
5.72215	0.00781329							5.72215	0.00818183
5.79646	0.00783434							5.79646	0.00816543
5.87077	0.00785443							5.87077	0.00814875
5.94509	0.0078736							5.94509	0.0081318
6.0194	0.00789187							6.0194	0.00811458
6.09372	0.00790927							6.09372	0.00809713
6.16803	0.00792584							6.16803	0.00807947
6.24234	0.00794158							6.24234	0.00806161
6.31666	0.00795654							6.31666	0.00804357
6.39097	0.00797074							6.39097	0.00802535
6.46528	0.00798421							6.46528	0.00800699
6.5396	0.00799695							6.5396	0.00798847
6.61391	0.00800899							6.61391	0.00796981
6.68822	0.00802038							6.68822	0.00795105
6.76254	0.00803111							6.76254	0.00793217
6.83685	0.00804121							6.83685	0.00791321
6.91117	0.0080507							6.91117	0.00789414
6.98548	0.0080596							6.98548	0.007875
7.05979	0.00806792							7.05979	0.00785578
7.13411	0.00807569							7.13411	0.00783651
7.20842	0.00808293							7.20842	0.00781719
7.28273	0.00808964							7.28273	0.00779782
7.35705	0.00809585							7.35705	0.00777841

## Sheet: 5a
$t$ [s]	V(t), B=7.78 mT		$t$ [s]	V(t), B=5.66 mT		$t$ [s]	V(t), B=3.54 mT		$t$ [s]	V(t), B=2.12 mT		$t$ [s]	V(t), B=1.42 mT		$t$ [s]	V(t), B=1.06 mT		$t$ [s]	V(t), B=0.71 mT		$t$ [s]	V(t), B=0.35 mT
0	1		0	1		0	1		0	1		0	1		0	1		0	1		0	1
0.00200401	0.999702		0.00200401	1.00016		0.00200401	1.00013		0.00200401	1.00005		0.00200401	1.00004		0.002	0.999956		0.00200401	0.999951		0.00198413	1.00002
0.00400802	0.999538		0.00400802	1.00033		0.00400802	1.00029		0.00400802	1.00005		0.00400802	0.999977		0.004	0.999956		0.00400802	0.999948		0.00396825	0.999917
0.00601202	0.999607		0.00601202	1.0006		0.00601202	1.00048		0.00601202	1.00022		0.00601202	1.00014		0.006	1.00003		0.00601202	0.999941		0.00595238	1.00001
0.00801603	0.999999		0.00801603	1.00119		0.00801603	1.00086		0.00801603	1.00035		0.00801603	1.00023		0.008	1.00011		0.00801603	1		0.00793651	1.00001
0.01002	1.00048		0.01002	1.00176		0.01002	1.0012		0.01002	1.00063		0.01002	1.00031		0.01	1.00006		0.01002	1.00001		0.00992063	1.00001
0.012024	1.00091		0.012024	1.00236		0.012024	1.00151		0.012024	1.00074		0.012024	1.00026		0.012	1.00016		0.012024	0.99998		0.0119048	1.00004
0.0140281	1.00186		0.0140281	1.00306		0.0140281	1.00184		0.0140281	1.00086		0.0140281	1.00039		0.014	1.00018		0.0140281	1.00001		0.0138889	1.00008
0.0160321	1.00275		0.0160321	1.00369		0.0160321	1.00215		0.0160321	1.00106		0.0160321	1.00054		0.016	1.00023		0.0160321	0.999967		0.015873	1.00007
0.0180361	1.00358		0.0180361	1.00442		0.0180361	1.00249		0.0180361	1.00129		0.0180361	1.00056		0.018	1.00027		0.0180361	0.999992		0.0178571	1.00004
0.0200401	1.00447		0.0200401	1.00502		0.0200401	1.00294		0.0200401	1.00143		0.0200401	1.00067		0.02	1.00027		0.0200401	1.00002		0.0198413	1
0.0220441	1.00545		0.0220441	1.00561		0.0220441	1.00332		0.0220441	1.00164		0.0220441	1.00067		0.022	1.00034		0.0220441	1.00006		0.0218254	1.00006
0.0240481	1.00641		0.0240481	1.00617		0.0240481	1.00376		0.0240481	1.00177		0.0240481	1.0009		0.024	1.00047		0.0240481	1.00007		0.0238095	0.999996
0.0260521	1.00734		0.0260521	1.00682		0.0260521	1.00412		0.0260521	1.00198		0.0260521	1.00103		0.026	1.00049		0.0260521	1.00005		0.0257937	1.00004
0.0280561	1.00813		0.0280561	1.00749		0.0280561	1.00447		0.0280561	1.00228		0.0280561	1.00119		0.028	1.00056		0.0280561	1.0001		0.0277778	1.00003
0.0300601	1.0088		0.0300601	1.00801		0.0300601	1.00495		0.0300601	1.00242		0.0300601	1.0012		0.03	1.00057		0.0300601	1.00024		0.0297619	1.00001
0.0320641	1.0096		0.0320641	1.00846		0.0320641	1.00529		0.0320641	1.00257		0.0320641	1.0014		0.032	1.00069		0.0320641	1.00022		0.031746	1.00005
0.0340681	1.0102		0.0340681	1.00903		0.0340681	1.00554		0.0340681	1.00281		0.0340681	1.00145		0.034	1.00064		0.0340681	1.00027		0.0337302	1.00003
0.0360721	1.01101		0.0360721	1.00952		0.0360721	1.00584		0.0360721	1.00303		0.0360721	1.00164		0.036	1.00078		0.0360721	1.00038		0.0357143	1.00016
0.0380762	1.01214		0.0380762	1.01048		0.0380762	1.00652		0.0380762	1.00338		0.0380762	1.00195		0.038	1.00099		0.0380762	1.00033		0.0376984	1.00012
0.0400802	1.01257		0.0400802	1.01086		0.0400802	1.00689		0.0400802	1.00356		0.0400802	1.00189		0.04	1.00108		0.0400802	1.00042		0.0396825	1.00012
0.0420842	1.013		0.0420842	1.0113		0.0420842	1.00718		0.0420842	1.00382		0.0420842	1.00199		0.042	1.00113		0.0420842	1.00039		0.0416667	1.00009
0.0440882	1.01353		0.0440882	1.01175		0.0440882	1.00753		0.0440882	1.00392		0.0440882	1.00214		0.044	1.00126		0.0440882	1.00042		0.0436508	1.00008
0.0460922	1.01391		0.0460922	1.01208		0.0460922	1.00775		0.0460922	1.0041		0.0460922	1.00218		0.046	1.00138		0.0460922	1.0005		0.0456349	1.00021
0.0480962	1.01441		0.0480962	1.01246		0.0480962	1.00812		0.0480962	1.00431		0.0480962	1.00233		0.048	1.00146		0.0480962	1.00065		0.047619	1.00021
0.0501002	1.01487		0.0501002	1.01275		0.0501002	1.00839		0.0501002	1.00456		0.0501002	1.00264		0.05	1.00151		0.0501002	1.00066		0.0496032	1.00014
0.0521042	1.01524		0.0521042	1.01309		0.0521042	1.0086		0.0521042	1.00478		0.0521042	1.00269		0.052	1.00152		0.0521042	1.00074		0.0515873	1.00024
0.0541082	1.01554		0.0541082	1.01337		0.0541082	1.00893		0.0541082	1.00491		0.0541082	1.0029		0.054	1.00158		0.0541082	1.00081		0.0535714	1.00025
0.0561122	1.01586		0.0561122	1.01368		0.0561122	1.00917		0.0561122	1.00498		0.0561122	1.00293		0.056	1.00173		0.0561122	1.00072		0.0555556	1.00024
0.0581162	1.0161		0.0581162	1.01399		0.0581162	1.00941		0.0581162	1.00516		0.0581162	1.00301		0.058	1.00173		0.0581162	1.00082		0.0575397	1.00017
0.0601202	1.01644		0.0601202	1.01431		0.0601202	1.00969		0.0601202	1.00531		0.0601202	1.00316		0.06	1.00191		0.0601202	1.00086		0.0595238	1.00016
0.0621242	1.01672		0.0621242	1.01456		0.0621242	1.00995		0.0621242	1.00551		0.0621242	1.00325		0.062	1.00201		0.0621242	1.00087		0.0615079	1.00021
0.0641283	1.01708		0.0641283	1.01483		0.0641283	1.01024		0.0641283	1.00569		0.0641283	1.00326		0.064	1.00206		0.0641283	1.00093		0.0634921	1.00022
0.0661323	1.01725		0.0661323	1.01509		0.0661323	1.01039		0.0661323	1.00579		0.0661323	1.00336		0.066	1.00208		0.0661323	1.00095		0.0654762	1.00022
0.0681363	1.01754		0.0681363	1.0153		0.0681363	1.01058		0.0681363	1.00588		0.0681363	1.00347		0.068	1.00227		0.0681363	1.00098		0.0674603	1.00028
0.0701403	1.01792		0.0701403	1.01566		0.0701403	1.01088		0.0701403	1.00604		0.0701403	1.00361		0.07	1.00236		0.0701403	1.00106		0.0694444	1.00026
0.0721443	1.01816		0.0721443	1.01588		0.0721443	1.01111		0.0721443	1.00633		0.0721443	1.00374		0.072	1.00234		0.0721443	1.00104		0.0714286	1.00028
0.0741483	1.01839		0.0741483	1.01618		0.0741483	1.01123		0.0741483	1.0064		0.0741483	1.00378		0.074	1.00242		0.0741483	1.00102		0.0734127	1.00027
0.0761523	1.01867		0.0761523	1.01641		0.0761523	1.01145		0.0761523	1.0067		0.0761523	1.00387		0.076	1.00259		0.0761523	1.00105		0.0753968	1.00032
0.0781563	1.01887		0.0781563	1.01668		0.0781563	1.01158		0.0781563	1.0068		0.0781563	1.00398		0.078	1.00266		0.0781563	1.00112		0.077381	1.00027
0.0801603	1.01907		0.0801603	1.01691		0.0801603	1.0118		0.0801603	1.00695		0.0801603	1.00411		0.08	1.00272		0.0801603	1.00117		0.0793651	1.00027
0.0821643	1.01941		0.0821643	1.01695		0.0821643	1.012		0.0821643	1.00701		0.0821643	1.00416		0.082	1.00279		0.0821643	1.00127		0.0813492	1.00037
0.0841683	1.01964		0.0841683	1.01714		0.0841683	1.01226		0.0841683	1.00721		0.0841683	1.00438		0.084	1.00297		0.0841683	1.00129		0.0833333	1.00034
0.0861723	1.01992		0.0861723	1.01749		0.0861723	1.01237		0.0861723	1.0074		0.0861723	1.00445		0.086	1.00306		0.0861723	1.00141		0.0853175	1.00042
0.0881764	1.02007		0.0881764	1.01777		0.0881764	1.01264		0.0881764	1.00764		0.0881764	1.00453		0.088	1.00306		0.0881764	1.00137		0.0873016	1.00048
0.0901804	1.02023		0.0901804	1.01796		0.0901804	1.01282		0.0901804	1.00777		0.0901804	1.00469		0.09	1.0031		0.0901804	1.00148		0.0892857	1.00038
0.0921844	1.02037		0.0921844	1.0181		0.0921844	1.01288		0.0921844	1.00783		0.0921844	1.00461		0.092	1.00313		0.0921844	1.00148		0.0912698	1.00043
0.0941884	1.0207		0.0941884	1.01828		0.0941884	1.01303		0.0941884	1.008		0.0941884	1.00475		0.094	1.00314		0.0941884	1.00147		0.093254	1.00046
0.0961924	1.02084		0.0961924	1.01862		0.0961924	1.01318		0.0961924	1.00818		0.0961924	1.00489		0.096	1.00314		0.0961924	1.00158		0.0952381	1.0005
0.0981964	1.02106		0.0981964	1.01873		0.0981964	1.01341		0.0981964	1.00833		0.0981964	1.00508		0.098	1.00323		0.0981964	1.0017		0.0972222	1.00046
0.1002	1.02127		0.1002	1.01884		0.1002	1.01361		0.1002	1.00836		0.1002	1.00512		0.1	1.00332		0.1002	1.0017		0.0992063	1.00044
0.102204	1.0214		0.102204	1.01897		0.102204	1.01379		0.102204	1.00857		0.102204	1.00519		0.102	1.00341		0.102204	1.00165		0.10119	1.0005
0.104208	1.02151		0.104208	1.0191		0.104208	1.014		0.104208	1.00872		0.104208	1.00537		0.104	1.00349		0.104208	1.00172		0.103175	1.00053
0.106212	1.02154		0.106212	1.01924		0.106212	1.01408		0.106212	1.00887		0.106212	1.00541		0.106	1.00361		0.106212	1.00178		0.105159	1.00045
0.108216	1.02179		0.108216	1.01939		0.108216	1.01434		0.108216	1.009		0.108216	1.00549		0.108	1.00369		0.108216	1.00183		0.107143	1.00057
0.11022	1.02193		0.11022	1.01961		0.11022	1.01458		0.11022	1.00913		0.11022	1.00557		0.11	1.00377		0.11022	1.00189		0.109127	1.00042
0.112224	1.02204		0.112224	1.01978		0.112224	1.01486		0.112224	1.00926		0.112224	1.00574		0.112	1.0039		0.112224	1.00199		0.111111	1.00051
0.114228	1.02214		0.114228	1.01987		0.114228	1.01482		0.114228	1.00949		0.114228	1.0058		0.114	1.00393		0.114228	1.002		0.113095	1.00058
0.116232	1.02229		0.116232	1.02019		0.116232	1.01507		0.116232	1.00964		0.116232	1.00585		0.116	1.004		0.116232	1.00205		0.115079	1.00059
0.118236	1.02242		0.118236	1.02028		0.118236	1.01519		0.118236	1.0098		0.118236	1.00602		0.118	1.00402		0.118236	1.00207		0.117063	1.00061
0.12024	1.02268		0.12024	1.02045		0.12024	1.01526		0.12024	1.00983		0.12024	1.00613		0.12	1.00411		0.12024	1.00211		0.119048	1.00064
0.122244	1.02286		0.122244	1.02074		0.122244	1.01544		0.122244	1.00999		0.122244	1.00623		0.122	1.00416		0.122244	1.00216		0.121032	1.00064
0.124248	1.02295		0.124248	1.02089		0.124248	1.01564		0.124248	1.01		0.124248	1.00632		0.124	1.00431		0.124248	1.00226		0.123016	1.00063
0.126253	1.02315		0.126253	1.02091		0.126253	1.01579		0.126253	1.01019		0.126253	1.00632		0.126	1.00431		0.126253	1.00225		0.125	1.00069
0.128257	1.02326		0.128257	1.02098		0.128257	1.01593		0.128257	1.0103		0.128257	1.00651		0.128	1.00433		0.128257	1.00226		0.126984	1.00071
0.130261	1.02329		0.130261	1.02123		0.130261	1.01601		0.130261	1.01042		0.130261	1.00658		0.13	1.00447		0.130261	1.00233		0.128968	1.00075
0.132265	1.0234		0.132265	1.02133		0.132265	1.01613		0.132265	1.01045		0.132265	1.00669		0.132	1.00455		0.132265	1.00245		0.130952	1.00067
0.134269	1.02356		0.134269	1.02143		0.134269	1.01624		0.134269	1.01058		0.134269	1.00673		0.134	1.00463		0.134269	1.00233		0.132937	1.00072
0.136273	1.0237		0.136273	1.02157		0.136273	1.01639		0.136273	1.0106		0.136273	1.00681		0.136	1.00464		0.136273	1.00239		0.134921	1.00074
0.138277	1.02375		0.138277	1.02163		0.138277	1.01653		0.138277	1.01078		0.138277	1.007		0.138	1.00476		0.138277	1.00246		0.136905	1.00072
0.140281	1.02394		0.140281	1.02178		0.140281	1.01659		0.140281	1.01096		0.140281	1.00715		0.14	1.00479		0.140281	1.00246		0.138889	1.0008
0.142285	1.02398		0.142285	1.02185		0.142285	1.01678		0.142285	1.01093		0.142285	1.00723		0.142	1.0049		0.142285	1.00247		0.140873	1.0007
0.144289	1.02414		0.144289	1.02202		0.144289	1.01693		0.144289	1.01117		0.144289	1.00728		0.144	1.00489		0.144289	1.00251		0.142857	1.00076
0.146293	1.02413		0.146293	1.02223		0.146293	1.01703		0.146293	1.01132		0.146293	1.00732		0.146	1.00497		0.146293	1.00261		0.144841	1.00081
0.148297	1.02429		0.148297	1.02225		0.148297	1.01708		0.148297	1.01144		0.148297	1.00736		0.148	1.00511		0.148297	1.0027		0.146825	1.00077
0.150301	1.02448		0.150301	1.02238		0.150301	1.01725		0.150301	1.01152		0.150301	1.0074		0.15	1.00514		0.150301	1.00278		0.14881	1.00081
0.152305	1.02459		0.152305	1.0225		0.152305	1.01738		0.152305	1.01172		0.152305	1.00747		0.152	1.0053		0.152305	1.00283		0.150794	1.00091
0.154309	1.02464		0.154309	1.02257		0.154309	1.01748		0.154309	1.01161		0.154309	1.00757		0.154	1.00533		0.154309	1.00285		0.152778	1.00084
0.156313	1.02469		0.156313	1.02273		0.156313	1.01756		0.156313	1.01183		0.156313	1.00774		0.156	1.00529		0.156313	1.00288		0.154762	1.00089
0.158317	1.02493		0.158317	1.02283		0.158317	1.01766		0.158317	1.01195		0.158317	1.00781		0.158	1.00532		0.158317	1.00289		0.156746	1.00089
0.160321	1.02511		0.160321	1.02288		0.160321	1.01781		0.160321	1.01204		0.160321	1.00786		0.16	1.0054		0.160321	1.00301		0.15873	1.00096
0.162325	1.02517		0.162325	1.02299		0.162325	1.01792		0.162325	1.01225		0.162325	1.00791		0.162	1.00546		0.162325	1.00298		0.160714	1.00094
0.164329	1.02523		0.164329	1.02311		0.164329	1.01804		0.164329	1.01225		0.164329	1.008		0.164	1.00555		0.164329	1.00299		0.162698	1.00094
0.166333	1.02532		0.166333	1.02306		0.166333	1.01826		0.166333	1.01242		0.166333	1.00812		0.166	1.00565		0.166333	1.003		0.164683	1.00098
0.168337	1.02538		0.168337	1.02325		0.168337	1.01828		0.168337	1.01243		0.168337	1.00822		0.168	1.00572		0.168337	1.0032		0.166667	1.00099
0.170341	1.02537		0.170341	1.02326		0.170341	1.01833		0.170341	1.01253		0.170341	1.00834		0.17	1.00571		0.170341	1.00319		0.168651	1.00095
0.172345	1.02548		0.172345	1.02343		0.172345	1.01844		0.172345	1.01271		0.172345	1.00839		0.172	1.00589		0.172345	1.00319		0.170635	1.00101
0.174349	1.02551		0.174349	1.02353		0.174349	1.01842		0.174349	1.01279		0.174349	1.00844		0.174	1.00588		0.174349	1.00329		0.172619	1.00106
0.176353	1.02557		0.176353	1.02366		0.176353	1.01861		0.176353	1.01279		0.176353	1.0085		0.176	1.00594		0.176353	1.00319		0.174603	1.00107
0.178357	1.02565		0.178357	1.02374		0.178357	1.01876		0.178357	1.01292		0.178357	1.00859		0.178	1.00605		0.178357	1.00339		0.176587	1.00107
0.180361	1.02568		0.180361	1.02388		0.180361	1.01887		0.180361	1.01302		0.180361	1.00867		0.18	1.00613		0.180361	1.00342		0.178571	1.00103
0.182365	1.0259		0.182365	1.02395		0.182365	1.01886		0.182365	1.01311		0.182365	1.00879		0.182	1.00614		0.182365	1.00345		0.180556	1.00109
0.184369	1.02589		0.184369	1.02392		0.184369	1.01906		0.184369	1.01312		0.184369	1.00884		0.184	1.00627		0.184369	1.00348		0.18254	1.00105
0.186373	1.02583		0.186373	1.02408		0.186373	1.01914		0.186373	1.01336		0.186373	1.00891		0.186	1.00627		0.186373	1.00353		0.184524	1.00112
0.188377	1.02598		0.188377	1.02418		0.188377	1.01924		0.188377	1.01347		0.188377	1.00903		0.188	1.00631		0.188377	1.00363		0.186508	1.00107
0.190381	1.02604		0.190381	1.02429		0.190381	1.01931		0.190381	1.01353		0.190381	1.00905		0.19	1.00637		0.190381	1.00367		0.188492	1.0011
0.192385	1.026		0.192385	1.02433		0.192385	1.01927		0.192385	1.01362		0.192385	1.00919		0.192	1.00653		0.192385	1.00374		0.190476	1.00111
0.194389	1.02611		0.194389	1.02438		0.194389	1.01934		0.194389	1.01382		0.194389	1.00918		0.194	1.00659		0.194389	1.00377		0.19246	1.00116
0.196393	1.02628		0.196393	1.02437		0.196393	1.01944		0.196393	1.0138		0.196393	1.00938		0.196	1.00651		0.196393	1.0037		0.194444	1.0012
0.198397	1.02624		0.198397	1.02456		0.198397	1.01955		0.198397	1.01388		0.198397	1.00937		0.198	1.00659		0.198397	1.00379		0.196429	1.00124
0.200401	1.02642		0.200401	1.02461		0.200401	1.01961		0.200401	1.01386		0.200401	1.00942		0.2	1.00664		0.200401	1.00389		0.198413	1.00123
0.202405	1.02653		0.202405	1.02474		0.202405	1.0198		0.202405	1.01409		0.202405	1.00954		0.202	1.00674		0.202405	1.00392		0.200397	1.00132
0.204409	1.02644		0.204409	1.02473		0.204409	1.01991		0.204409	1.01401		0.204409	1.00967		0.204	1.00686		0.204409	1.00386		0.202381	1.00142
0.206413	1.02664		0.206413	1.02471		0.206413	1.01997		0.206413	1.01402		0.206413	1.00966		0.206	1.00683		0.206413	1.0039		0.204365	1.00134
0.208417	1.02663		0.208417	1.02478		0.208417	1.01998		0.208417	1.01422		0.208417	1.00985		0.208	1.00685		0.208417	1.00399		0.206349	1.00143
0.210421	1.0267		0.210421	1.0248		0.210421	1.01997		0.210421	1.01437		0.210421	1.00984		0.21	1.00709		0.210421	1.00398		0.208333	1.00127
0.212425	1.02674		0.212425	1.02484		0.212425	1.02011		0.212425	1.01444		0.212425	1.00988		0.212	1.00714		0.212425	1.00411		0.210317	1.00139
0.214429	1.02686		0.214429	1.02502		0.214429	1.02011		0.214429	1.01444		0.214429	1.01002		0.214	1.00725		0.214429	1.00405		0.212302	1.00132
0.216433	1.02692		0.216433	1.02503		0.216433	1.0202		0.216433	1.01441		0.216433	1.01007		0.216	1.00731		0.216433	1.00408		0.214286	1.00136
0.218437	1.02691		0.218437	1.02508		0.218437	1.02034		0.218437	1.01442		0.218437	1.01017		0.218	1.00739		0.218437	1.00417		0.21627	1.00136
0.220441	1.02694		0.220441	1.02521		0.220441	1.02045		0.220441	1.01458		0.220441	1.01022		0.22	1.00747		0.220441	1.00427		0.218254	1.00133
0.222445	1.02693		0.222445	1.02527		0.222445	1.02047		0.222445	1.01465		0.222445	1.01019		0.222	1.00747		0.222445	1.00429		0.220238	1.00137
0.224449	1.02701		0.224449	1.02535		0.224449	1.02052		0.224449	1.01467		0.224449	1.01018		0.224	1.00753		0.224449	1.00431		0.222222	1.00136
0.226453	1.02705		0.226453	1.02529		0.226453	1.0206		0.226453	1.01487		0.226453	1.01032		0.226	1.00757		0.226453	1.00437		0.224206	1.00145
0.228457	1.02709		0.228457	1.02528		0.228457	1.02061		0.228457	1.01496		0.228457	1.01053		0.228	1.00766		0.228457	1.00438		0.22619	1.00143
0.230461	1.02721		0.230461	1.02542		0.230461	1.02063		0.230461	1.01501		0.230461	1.01052		0.23	1.00768		0.230461	1.0045		0.228175	1.0016
0.232465	1.02729		0.232465	1.02541		0.232465	1.02078		0.232465	1.01508		0.232465	1.01063		0.232	1.00776		0.232465	1.00462		0.230159	1.00155
0.234469	1.02739		0.234469	1.02542		0.234469	1.02083		0.234469	1.01526		0.234469	1.01059		0.234	1.00783		0.234469	1.00461		0.232143	1.00155
0.236473	1.02744		0.236473	1.02555		0.236473	1.02092		0.236473	1.0153		0.236473	1.01061		0.236	1.00785		0.236473	1.00457		0.234127	1.00156
0.238477	1.02747		0.238477	1.0257		0.238477	1.02101		0.238477	1.0153		0.238477	1.01072		0.238	1.00793		0.238477	1.0046		0.236111	1.00153
0.240481	1.02746		0.240481	1.02573		0.240481	1.02098		0.240481	1.01539		0.240481	1.01067		0.24	1.00795		0.240481	1.00462		0.238095	1.00153
0.242485	1.02758		0.242485	1.02577		0.242485	1.02098		0.242485	1.01548		0.242485	1.01077		0.242	1.00802		0.242485	1.00462		0.240079	1.00155
0.244489	1.02762		0.244489	1.02584		0.244489	1.02112		0.244489	1.0155		0.244489	1.01088		0.244	1.00811		0.244489	1.00464		0.242063	1.00152
0.246493	1.02753		0.246493	1.02585		0.246493	1.02124		0.246493	1.01555		0.246493	1.01093		0.246	1.00809		0.246493	1.00465		0.244048	1.00158
0.248497	1.02756		0.248497	1.02592		0.248497	1.02117		0.248497	1.01558		0.248497	1.01101		0.248	1.00807		0.248497	1.00472		0.246032	1.00154
0.250501	1.02765		0.250501	1.02593		0.250501	1.02122		0.250501	1.01568		0.250501	1.01099		0.25	1.00814		0.250501	1.00489		0.248016	1.00158
0.252505	1.02767		0.252505	1.02593		0.252505	1.02126		0.252505	1.01579		0.252505	1.01109		0.252	1.0082		0.252505	1.00492		0.25	1.00164
0.254509	1.02778		0.254509	1.02597		0.254509	1.02139		0.254509	1.01598		0.254509	1.01116		0.254	1.00827		0.254509	1.00492		0.251984	1.00163
0.256513	1.02781		0.256513	1.02604		0.256513	1.02144		0.256513	1.016		0.256513	1.01119		0.256	1.00831		0.256513	1.00489		0.253968	1.00166
0.258517	1.02782		0.258517	1.02604		0.258517	1.02155		0.258517	1.01604		0.258517	1.01128		0.258	1.00844		0.258517	1.00499		0.255952	1.00162
0.260521	1.02795		0.260521	1.02613		0.260521	1.02156		0.260521	1.01613		0.260521	1.01136		0.26	1.00841		0.260521	1.00496		0.257937	1.00165
0.262525	1.02802		0.262525	1.02616		0.262525	1.02167		0.262525	1.01624		0.262525	1.01143		0.262	1.00859		0.262525	1.00501		0.259921	1.00173
0.264529	1.02804		0.264529	1.02633		0.264529	1.02167		0.264529	1.01617		0.264529	1.0115		0.264	1.00864		0.264529	1.00506		0.261905	1.0017
0.266533	1.02807		0.266533	1.02631		0.266533	1.02181		0.266533	1.01622		0.266533	1.01163		0.266	1.00861		0.266533	1.00523		0.263889	1.00175
0.268537	1.02801		0.268537	1.02625		0.268537	1.02199		0.268537	1.01624		0.268537	1.01161		0.268	1.00861		0.268537	1.00516		0.265873	1.0018
0.270541	1.02805		0.270541	1.02634		0.270541	1.0219		0.270541	1.01618		0.270541	1.01169		0.27	1.00868		0.270541	1.00519		0.267857	1.00179
0.272545	1.02819		0.272545	1.02638		0.272545	1.02189		0.272545	1.01626		0.272545	1.01175		0.272	1.00874		0.272545	1.00531		0.269841	1.00174
0.274549	1.0282		0.274549	1.02632		0.274549	1.02193		0.274549	1.0163		0.274549	1.01184		0.274	1.00875		0.274549	1.00539		0.271825	1.00175
0.276553	1.02821		0.276553	1.02651		0.276553	1.02213		0.276553	1.01638		0.276553	1.01197		0.276	1.00877		0.276553	1.00533		0.27381	1.00189
0.278557	1.02809		0.278557	1.02643		0.278557	1.02221		0.278557	1.0164		0.278557	1.01193		0.278	1.0088		0.278557	1.00533		0.275794	1.00195
0.280561	1.02822		0.280561	1.02656		0.280561	1.02211		0.280561	1.01643		0.280561	1.01198		0.28	1.00888		0.280561	1.00539		0.277778	1.00187
0.282565	1.02824		0.282565	1.02667		0.282565	1.02216		0.282565	1.0164		0.282565	1.012		0.282	1.00892		0.282565	1.00541		0.279762	1.00187
0.284569	1.02829		0.284569	1.02661		0.284569	1.02216		0.284569	1.01652		0.284569	1.01203		0.284	1.00892		0.284569	1.00545		0.281746	1.00191
0.286573	1.02837		0.286573	1.02679		0.286573	1.02219		0.286573	1.01659		0.286573	1.01215		0.286	1.00903		0.286573	1.00548		0.28373	1.00195
0.288577	1.0283		0.288577	1.0268		0.288577	1.02223		0.288577	1.0167		0.288577	1.01211		0.288	1.00904		0.288577	1.00549		0.285714	1.00188
0.290581	1.02835		0.290581	1.0268		0.290581	1.02228		0.290581	1.01676		0.290581	1.01215		0.29	1.00913		0.290581	1.00547		0.287698	1.00195
0.292585	1.02842		0.292585	1.02683		0.292585	1.02216		0.292585	1.01681		0.292585	1.01217		0.292	1.00932		0.292585	1.00552		0.289683	1.00193
0.294589	1.02843		0.294589	1.02679		0.294589	1.02224		0.294589	1.01686		0.294589	1.01221		0.294	1.00928		0.294589	1.00554		0.291667	1.00194
0.296593	1.02845		0.296593	1.02686		0.296593	1.02245		0.296593	1.01698		0.296593	1.01223		0.296	1.00927		0.296593	1.00558		0.293651	1.00203
0.298597	1.02844		0.298597	1.02694		0.298597	1.02248		0.298597	1.01696		0.298597	1.01226		0.298	1.00927		0.298597	1.0056		0.295635	1.00203
0.300601	1.02856		0.300601	1.0269		0.300601	1.02259		0.300601	1.01707		0.300601	1.01233		0.3	1.00931		0.300601	1.0057		0.297619	1.00206
0.302605	1.02862		0.302605	1.02704		0.302605	1.02255		0.302605	1.01712		0.302605	1.01226		0.302	1.00934		0.302605	1.00575		0.299603	1.00201
0.304609	1.02857		0.304609	1.02694		0.304609	1.02258		0.304609	1.01712		0.304609	1.01232		0.304	1.00939		0.304609	1.00572		0.301587	1.00211
0.306613	1.02852		0.306613	1.02702		0.306613	1.02271		0.306613	1.01702		0.306613	1.01244		0.306	1.00942		0.306613	1.00576		0.303571	1.00209
0.308617	1.02855		0.308617	1.02705		0.308617	1.02274		0.308617	1.0172		0.308617	1.01245		0.308	1.00957		0.308617	1.00577		0.305556	1.00202
0.310621	1.02854		0.310621	1.02711		0.310621	1.02268		0.310621	1.01728		0.310621	1.01251		0.31	1.0096		0.310621	1.0059		0.30754	1.00223
0.312625	1.02857		0.312625	1.02714		0.312625	1.02276		0.312625	1.01727		0.312625	1.01262		0.312	1.0097		0.312625	1.00585		0.309524	1.00212
0.314629	1.02875		0.314629	1.0272		0.314629	1.02271		0.314629	1.01726		0.314629	1.01268		0.314	1.00968		0.314629	1.00584		0.311508	1.00222
0.316633	1.02876		0.316633	1.02726		0.316633	1.02286		0.316633	1.01732		0.316633	1.01273		0.316	1.00962		0.316633	1.00606		0.313492	1.00222
0.318637	1.02873		0.318637	1.02729		0.318637	1.02289		0.318637	1.01747		0.318637	1.0127		0.318	1.00961		0.318637	1.00605		0.315476	1.0022
0.320641	1.02873		0.320641	1.02725		0.320641	1.02287		0.320641	1.01741		0.320641	1.01275		0.32	1.00966		0.320641	1.00601		0.31746	1.00224
0.322645	1.02884		0.322645	1.02715		0.322645	1.02297		0.322645	1.01739		0.322645	1.0128		0.322	1.00977		0.322645	1.006		0.319444	1.00225
0.324649	1.02886		0.324649	1.02724		0.324649	1.02306		0.324649	1.01748		0.324649	1.01273		0.324	1.00972		0.324649	1.00598		0.321429	1.0022
0.326653	1.02888		0.326653	1.02726		0.326653	1.02302		0.326653	1.01739		0.326653	1.0128		0.326	1.0098		0.326653	1.006		0.323413	1.00222
0.328657	1.0288		0.328657	1.02729		0.328657	1.02307		0.328657	1.01742		0.328657	1.0129		0.328	1.00993		0.328657	1.00595		0.325397	1.00228
0.330661	1.02884		0.330661	1.02737		0.330661	1.023		0.330661	1.01763		0.330661	1.01296		0.33	1.00995		0.330661	1.00608		0.327381	1.00221
0.332665	1.02887		0.332665	1.02733		0.332665	1.023		0.332665	1.0177		0.332665	1.01308		0.332	1.01003		0.332665	1.00609		0.329365	1.00226
0.334669	1.02884		0.334669	1.02735		0.334669	1.02302		0.334669	1.01776		0.334669	1.01305		0.334	1.01005		0.334669	1.00603		0.331349	1.00221
0.336673	1.02877		0.336673	1.02737		0.336673	1.02311		0.336673	1.01783		0.336673	1.01306		0.336	1.01003		0.336673	1.00601		0.333333	1.00231
0.338677	1.02882		0.338677	1.02742		0.338677	1.02299		0.338677	1.01784		0.338677	1.01309		0.338	1.01006		0.338677	1.00611		0.335317	1.00232
0.340681	1.029		0.340681	1.02741		0.340681	1.02311		0.340681	1.01773		0.340681	1.01312		0.34	1.01013		0.340681	1.00611		0.337302	1.0023
0.342685	1.02894		0.342685	1.02739		0.342685	1.02316		0.342685	1.01787		0.342685	1.01312		0.342	1.01012		0.342685	1.00611		0.339286	1.00231
0.344689	1.02892		0.344689	1.02736		0.344689	1.02319		0.344689	1.01781		0.344689	1.01315		0.344	1.01016		0.344689	1.00615		0.34127	1.00235
0.346693	1.02891		0.346693	1.02725		0.346693	1.02332		0.346693	1.01783		0.346693	1.01322		0.346	1.01018		0.346693	1.00626		0.343254	1.00232
0.348697	1.02897		0.348697	1.02745		0.348697	1.02342		0.348697	1.01788		0.348697	1.01312		0.348	1.01029		0.348697	1.00625		0.345238	1.0024
0.350701	1.02906		0.350701	1.02739		0.350701	1.02344		0.350701	1.0179		0.350701	1.01318		0.35	1.01022		0.350701	1.00634		0.347222	1.00244
0.352705	1.029		0.352705	1.02738		0.352705	1.02338		0.352705	1.01793		0.352705	1.01323		0.352	1.01035		0.352705	1.00632		0.349206	1.00246
0.354709	1.02899		0.354709	1.02745		0.354709	1.02346		0.354709	1.01803		0.354709	1.0133		0.354	1.01043		0.354709	1.00637		0.35119	1.00248
0.356713	1.02905		0.356713	1.02752		0.356713	1.02338		0.356713	1.01796		0.356713	1.01332		0.356	1.01046		0.356713	1.00638		0.353175	1.00251
0.358717	1.02904		0.358717	1.02758		0.358717	1.02339		0.358717	1.01802		0.358717	1.01336		0.358	1.01036		0.358717	1.00646		0.355159	1.00248
0.360721	1.02911		0.360721	1.02764		0.360721	1.02338		0.360721	1.01814		0.360721	1.01332		0.36	1.01039		0.360721	1.0065		0.357143	1.00251
0.362725	1.02915		0.362725	1.02756		0.362725	1.02345		0.362725	1.01812		0.362725	1.01334		0.362	1.01044		0.362725	1.00643		0.359127	1.00243
0.364729	1.02915		0.364729	1.02753		0.364729	1.02335		0.364729	1.01815		0.364729	1.01331		0.364	1.0105		0.364729	1.00644		0.361111	1.00246
0.366733	1.02916		0.366733	1.02761		0.366733	1.02332		0.366733	1.01808		0.366733	1.01342		0.366	1.01054		0.366733	1.00662		0.363095	1.00253
0.368737	1.0293		0.368737	1.02773		0.368737	1.02343		0.368737	1.01803		0.368737	1.01345		0.368	1.01058		0.368737	1.00655		0.365079	1.0025
0.370741	1.02938		0.370741	1.02768		0.370741	1.02348		0.370741	1.01817		0.370741	1.01355		0.37	1.01067		0.370741	1.00662		0.367063	1.00256
0.372745	1.02938		0.372745	1.02777		0.372745	1.02344		0.372745	1.01829		0.372745	1.01356		0.372	1.01069		0.372745	1.00661		0.369048	1.00253
0.374749	1.02933		0.374749	1.02776		0.374749	1.02367		0.374749	1.01831		0.374749	1.01347		0.374	1.0107		0.374749	1.00663		0.371032	1.00253
0.376754	1.02932		0.376754	1.0278		0.376754	1.02357		0.376754	1.01839		0.376754	1.01353		0.376	1.01072		0.376754	1.00671		0.373016	1.0025
0.378758	1.02931		0.378758	1.02775		0.378758	1.02362		0.378758	1.01825		0.378758	1.01352		0.378	1.01077		0.378758	1.00674		0.375	1.00265
0.380762	1.02926		0.380762	1.02767		0.380762	1.02363		0.380762	1.0183		0.380762	1.01361		0.38	1.01068		0.380762	1.00669		0.376984	1.00261
0.382766	1.02932		0.382766	1.02769		0.382766	1.02359		0.382766	1.01836		0.382766	1.0137		0.382	1.01076		0.382766	1.00661		0.378968	1.00262
0.38477	1.02928		0.38477	1.02774		0.38477	1.02348		0.38477	1.01842		0.38477	1.01378		0.384	1.01076		0.38477	1.00668		0.380952	1.00268
0.386774	1.02925		0.386774	1.02779		0.386774	1.02357		0.386774	1.01837		0.386774	1.01384		0.386	1.01088		0.386774	1.00671		0.382937	1.00259
0.388778	1.02927		0.388778	1.02781		0.388778	1.02371		0.388778	1.01834		0.388778	1.01388		0.388	1.01093		0.388778	1.00697		0.384921	1.00264
0.390782	1.02918		0.390782	1.0278		0.390782	1.02376		0.390782	1.01842		0.390782	1.01383		0.39	1.01085		0.390782	1.00688		0.386905	1.00262
0.392786	1.02916		0.392786	1.02776		0.392786	1.0238		0.392786	1.01838		0.392786	1.01393		0.392	1.01089		0.392786	1.00693		0.388889	1.00259
0.39479	1.02921		0.39479	1.02784		0.39479	1.02379		0.39479	1.01846		0.39479	1.01386		0.394	1.01092		0.39479	1.00689		0.390873	1.00254
0.396794	1.02932		0.396794	1.02786		0.396794	1.02369		0.396794	1.01843		0.396794	1.01393		0.396	1.01094		0.396794	1.00695		0.392857	1.00265
0.398798	1.02933		0.398798	1.02775		0.398798	1.02366		0.398798	1.01841		0.398798	1.01385		0.398	1.01091		0.398798	1.00678		0.394841	1.00268
0.400802	1.02945		0.400802	1.02783		0.400802	1.02364		0.400802	1.01847		0.400802	1.01387		0.4	1.01087		0.400802	1.00684		0.396825	1.00264
0.402806	1.02931		0.402806	1.0278		0.402806	1.02373		0.402806	1.0184		0.402806	1.01399		0.402	1.01092		0.402806	1.00689		0.39881	1.00264
0.40481	1.02937		0.40481	1.02787		0.40481	1.02382		0.40481	1.0186		0.40481	1.01391		0.404	1.01098		0.40481	1.00686		0.400794	1.00268
0.406814	1.0293		0.406814	1.0278		0.406814	1.0239		0.406814	1.01862		0.406814	1.01397		0.406	1.01098		0.406814	1.00682		0.402778	1.00275
0.408818	1.02946		0.408818	1.02797		0.408818	1.02378		0.408818	1.01853		0.408818	1.01394		0.408	1.01103		0.408818	1.00695		0.404762	1.00274
0.410822	1.02945		0.410822	1.02804		0.410822	1.02378		0.410822	1.01844		0.410822	1.01392		0.41	1.01115		0.410822	1.00696		0.406746	1.00272
0.412826	1.02942		0.412826	1.02798		0.412826	1.02375		0.412826	1.01855		0.412826	1.01397		0.412	1.01108		0.412826	1.00708		0.40873	1.00276
0.41483	1.02931		0.41483	1.028		0.41483	1.02362		0.41483	1.01861		0.41483	1.01396		0.414	1.01111		0.41483	1.00696		0.410714	1.00274
0.416834	1.02926		0.416834	1.02793		0.416834	1.0236		0.416834	1.01858		0.416834	1.01397		0.416	1.01108		0.416834	1.00689		0.412698	1.0027
0.418838	1.02925		0.418838	1.02798		0.418838	1.02381		0.418838	1.01859		0.418838	1.01395		0.418	1.01102		0.418838	1.00697		0.414683	1.00273
0.420842	1.02943		0.420842	1.02793		0.420842	1.02384		0.420842	1.01861		0.420842	1.01394		0.42	1.01101		0.420842	1.00698		0.416667	1.00274
0.422846	1.02937		0.422846	1.02799		0.422846	1.02386		0.422846	1.01848		0.422846	1.01406		0.422	1.01105		0.422846	1.00703		0.418651	1.00275
0.42485	1.02944		0.42485	1.02807		0.42485	1.02385		0.42485	1.01863		0.42485	1.01417		0.424	1.01111		0.42485	1.00702		0.420635	1.00275
0.426854	1.02946		0.426854	1.02814		0.426854	1.02378		0.426854	1.01874		0.426854	1.01419		0.426	1.01111		0.426854	1.00704		0.422619	1.00282
0.428858	1.02931		0.428858	1.02818		0.428858	1.02381		0.428858	1.01874		0.428858	1.01413		0.428	1.01113		0.428858	1.00703		0.424603	1.00272
0.430862	1.0295		0.430862	1.02817		0.430862	1.02383		0.430862	1.01866		0.430862	1.0141		0.43	1.01118		0.430862	1.00703		0.426587	1.00275
0.432866	1.02946		0.432866	1.02805		0.432866	1.0238		0.432866	1.01853		0.432866	1.01417		0.432	1.01122		0.432866	1.00708		0.428571	1.00278
0.43487	1.02943		0.43487	1.02808		0.43487	1.02385		0.43487	1.01858		0.43487	1.01421		0.434	1.01126		0.43487	1.00703		0.430556	1.00274
0.436874	1.02953		0.436874	1.02806		0.436874	1.02387		0.436874	1.0185		0.436874	1.01413		0.436	1.01133		0.436874	1.00703		0.43254	1.00268
0.438878	1.02957		0.438878	1.02803		0.438878	1.02381		0.438878	1.01861		0.438878	1.01421		0.438	1.0113		0.438878	1.00716		0.434524	1.00281
0.440882	1.02941		0.440882	1.02796		0.440882	1.02377		0.440882	1.0186		0.440882	1.01424		0.44	1.01128		0.440882	1.00709		0.436508	1.00274
0.442886	1.02941		0.442886	1.02801		0.442886	1.02383		0.442886	1.01867		0.442886	1.01411		0.442	1.01133		0.442886	1.00711		0.438492	1.00278
0.44489	1.02941		0.44489	1.02803		0.44489	1.02385		0.44489	1.01872		0.44489	1.0141		0.444	1.01129		0.44489	1.00706		0.440476	1.00273
0.446894	1.02949		0.446894	1.02807		0.446894	1.02395		0.446894	1.01876		0.446894	1.0142		0.446	1.01129		0.446894	1.00707		0.44246	1.00282
0.448898	1.02941		0.448898	1.02804		0.448898	1.02402		0.448898	1.01863		0.448898	1.01417		0.448	1.01131		0.448898	1.00718		0.444444	1.00279
0.450902	1.02942		0.450902	1.02813		0.450902	1.02397		0.450902	1.01868		0.450902	1.01407		0.45	1.01135		0.450902	1.00724		0.446429	1.00275
0.452906	1.02944		0.452906	1.02806		0.452906	1.02391		0.452906	1.01868		0.452906	1.01417		0.452	1.01132		0.452906	1.0071		0.448413	1.00275
0.45491	1.02938		0.45491	1.02813		0.45491	1.02405		0.45491	1.0187		0.45491	1.01404		0.454	1.01125		0.45491	1.00716		0.450397	1.00284
0.456914	1.02941		0.456914	1.02804		0.456914	1.02401		0.456914	1.01869		0.456914	1.01404		0.456	1.01126		0.456914	1.00721		0.452381	1.00274
0.458918	1.02951		0.458918	1.02812		0.458918	1.02405		0.458918	1.01868		0.458918	1.01417		0.458	1.0113		0.458918	1.00713		0.454365	1.0028
0.460922	1.02953		0.460922	1.02812		0.460922	1.02398		0.460922	1.01872		0.460922	1.01424		0.46	1.0113		0.460922	1.00725		0.456349	1.00281
0.462926	1.02956		0.462926	1.02807		0.462926	1.02402		0.462926	1.01871		0.462926	1.01416		0.462	1.01136		0.462926	1.00725		0.458333	1.0028
0.46493	1.02963		0.46493	1.0281		0.46493	1.02393		0.46493	1.01867		0.46493	1.01428		0.464	1.01131		0.46493	1.00734		0.460317	1.00279
0.466934	1.02961		0.466934	1.02812		0.466934	1.02398		0.466934	1.01881		0.466934	1.01425		0.466	1.01131		0.466934	1.00736		0.462302	1.00282
0.468938	1.02952		0.468938	1.02811		0.468938	1.02396		0.468938	1.01882		0.468938	1.01413		0.468	1.01141		0.468938	1.00734		0.464286	1.00281
0.470942	1.02955		0.470942	1.02816		0.470942	1.02402		0.470942	1.01881		0.470942	1.01409		0.47	1.01137		0.470942	1.00729		0.46627	1.00283
0.472946	1.02957		0.472946	1.02816		0.472946	1.02397		0.472946	1.01876		0.472946	1.01418		0.472	1.01138		0.472946	1.00733		0.468254	1.00283
0.47495	1.02957		0.47495	1.0282		0.47495	1.02396		0.47495	1.0188		0.47495	1.01415		0.474	1.01135		0.47495	1.00728		0.470238	1.00284
0.476954	1.02954		0.476954	1.02828		0.476954	1.02402		0.476954	1.0188		0.476954	1.01412		0.476	1.01138		0.476954	1.0073		0.472222	1.00284
0.478958	1.02947		0.478958	1.02817		0.478958	1.02396		0.478958	1.01879		0.478958	1.01427		0.478	1.01135		0.478958	1.0072		0.474206	1.0028
0.480962	1.02942		0.480962	1.02812		0.480962	1.02387		0.480962	1.01869		0.480962	1.0142		0.48	1.0114		0.480962	1.00719		0.47619	1.00282
0.482966	1.02946		0.482966	1.02814		0.482966	1.02384		0.482966	1.01867		0.482966	1.01423		0.482	1.01136		0.482966	1.00719		0.478175	1.00281
0.48497	1.02946		0.48497	1.02817		0.48497	1.02401		0.48497	1.01873		0.48497	1.01415		0.484	1.01144		0.48497	1.00725		0.480159	1.0028
0.486974	1.0292		0.486974	1.02807		0.486974	1.024		0.486974	1.01879		0.486974	1.01411		0.486	1.01138		0.486974	1.0072		0.482143	1.00286
0.488978	1.02939		0.488978	1.0281		0.488978	1.02404		0.488978	1.01878		0.488978	1.01423		0.488	1.01132		0.488978	1.0072		0.484127	1.00288
0.490982	1.02931		0.490982	1.02818		0.490982	1.02404		0.490982	1.01881		0.490982	1.01411		0.49	1.01132		0.490982	1.00723		0.486111	1.00285
0.492986	1.02949		0.492986	1.02814		0.492986	1.02404		0.492986	1.01879		0.492986	1.01411		0.492	1.01145		0.492986	1.00727		0.488095	1.00286
0.49499	1.02949		0.49499	1.02808		0.49499	1.02404		0.49499	1.01885		0.49499	1.01424		0.494	1.01144		0.49499	1.00718		0.490079	1.00281
0.496994	1.02933		0.496994	1.02809		0.496994	1.024		0.496994	1.01883		0.496994	1.01413		0.496	1.01138		0.496994	1.0072		0.492063	1.00284
0.498998	1.02937		0.498998	1.02812		0.498998	1.02397		0.498998	1.01889		0.498998	1.01418		0.498	1.0114		0.498998	1.00715		0.494048	1.00287
0.501002	1.02941		0.501002	1.02826		0.501002	1.02397		0.501002	1.01889		0.501002	1.01424		0.5	1.01136		0.501002	1.00719		0.496032	1.00288
0.503006	1.02949		0.503006	1.02819		0.503006	1.02389		0.503006	1.01887		0.503006	1.0142		0.502	1.0114		0.503006	1.00718		0.498016	1.00287
0.50501	1.02939		0.50501	1.02802		0.50501	1.02386		0.50501	1.01874		0.50501	1.01411		0.504	1.01149		0.50501	1.00717		0.5	1.00285
0.507014	1.02941		0.507014	1.02797		0.507014	1.02396		0.507014	1.01881		0.507014	1.01424		0.506	1.01136		0.507014	1.00726		0.501984	1.00288
0.509018	1.0294		0.509018	1.02808		0.509018	1.02391		0.509018	1.01876		0.509018	1.01429		0.508	1.01134		0.509018	1.00718		0.503968	1.00292
0.511022	1.02944		0.511022	1.02807		0.511022	1.02379		0.511022	1.01879		0.511022	1.01425		0.51	1.01136		0.511022	1.0072		0.505952	1.00294
0.513026	1.02931		0.513026	1.028		0.513026	1.02388		0.513026	1.01877		0.513026	1.01419		0.512	1.01139		0.513026	1.00717		0.507937	1.00282
0.51503	1.02932		0.51503	1.02802		0.51503	1.02394		0.51503	1.01876		0.51503	1.01418		0.514	1.01146		0.51503	1.00722		0.509921	1.00291
0.517034	1.02926		0.517034	1.02806		0.517034	1.02401		0.517034	1.01872		0.517034	1.01409		0.516	1.0115		0.517034	1.00724		0.511905	1.00285
0.519038	1.02935		0.519038	1.02809		0.519038	1.02398		0.519038	1.01878		0.519038	1.01408		0.518	1.01149		0.519038	1.00725		0.513889	1.00285
0.521042	1.02935		0.521042	1.02806		0.521042	1.02398		0.521042	1.01873		0.521042	1.01404		0.52	1.01147		0.521042	1.00724		0.515873	1.00285
0.523046	1.02925		0.523046	1.02801		0.523046	1.02401		0.523046	1.01879		0.523046	1.01412		0.522	1.01146		0.523046	1.00712		0.517857	1.00282
0.52505	1.0293		0.52505	1.02809		0.52505	1.02395		0.52505	1.01874		0.52505	1.014		0.524	1.01146		0.52505	1.00717		0.519841	1.00284
0.527054	1.0293		0.527054	1.02808		0.527054	1.02382		0.527054	1.01876		0.527054	1.01399		0.526	1.01138		0.527054	1.00721		0.521825	1.00283
0.529058	1.02928		0.529058	1.02804		0.529058	1.02376		0.529058	1.01869		0.529058	1.0141		0.528	1.01132		0.529058	1.00722		0.52381	1.00288
0.531062	1.02918		0.531062	1.02798		0.531062	1.02379		0.531062	1.01876		0.531062	1.01409		0.53	1.01128		0.531062	1.0072		0.525794	1.00293
0.533066	1.02928		0.533066	1.02802		0.533066	1.0238		0.533066	1.01868		0.533066	1.01412		0.532	1.01129		0.533066	1.00714		0.527778	1.00293
0.53507	1.02921		0.53507	1.02801		0.53507	1.02383		0.53507	1.01862		0.53507	1.01419		0.534	1.01123		0.53507	1.00714		0.529762	1.00278
0.537074	1.02916		0.537074	1.02804		0.537074	1.02377		0.537074	1.01863		0.537074	1.01408		0.536	1.01142		0.537074	1.00719		0.531746	1.00283
0.539078	1.02912		0.539078	1.02797		0.539078	1.02382		0.539078	1.01863		0.539078	1.01409		0.538	1.01124		0.539078	1.00717		0.53373	1.00286
0.541082	1.02921		0.541082	1.02798		0.541082	1.02379		0.541082	1.01864		0.541082	1.01403		0.54	1.01123		0.541082	1.00714		0.535714	1.00279
0.543086	1.02918		0.543086	1.02801		0.543086	1.02383		0.543086	1.01858		0.543086	1.01395		0.542	1.01121		0.543086	1.00711		0.537698	1.00279
0.54509	1.02913		0.54509	1.028		0.54509	1.02375		0.54509	1.01867		0.54509	1.01407		0.544	1.01123		0.54509	1.00712		0.539683	1.00285
0.547094	1.02916		0.547094	1.02796		0.547094	1.02383		0.547094	1.01859		0.547094	1.01402		0.546	1.01128		0.547094	1.00714		0.541667	1.00281
0.549098	1.02905		0.549098	1.02798		0.549098	1.02391		0.549098	1.01851		0.549098	1.01403		0.548	1.01127		0.549098	1.00713		0.543651	1.00287
0.551102	1.02914		0.551102	1.02801		0.551102	1.02389		0.551102	1.01854		0.551102	1.01401		0.55	1.01126		0.551102	1.00721		0.545635	1.00277
0.553106	1.02906		0.553106	1.02794		0.553106	1.02376		0.553106	1.01856		0.553106	1.01402		0.552	1.01126		0.553106	1.00719		0.547619	1.00287
0.55511	1.02901		0.55511	1.02785		0.55511	1.02383		0.55511	1.01847		0.55511	1.01393		0.554	1.01133		0.55511	1.00705		0.549603	1.00283
0.557114	1.02905		0.557114	1.02792		0.557114	1.02375		0.557114	1.01851		0.557114	1.01392		0.556	1.01124		0.557114	1.00711		0.551587	1.00287
0.559118	1.02896		0.559118	1.02785		0.559118	1.02378		0.559118	1.01849		0.559118	1.01391		0.558	1.01119		0.559118	1.00712		0.553571	1.00281
0.561122	1.02896		0.561122	1.02782		0.561122	1.02382		0.561122	1.01844		0.561122	1.01383		0.56	1.01115		0.561122	1.00702		0.555556	1.00278
0.563126	1.02901		0.563126	1.0278		0.563126	1.02363		0.563126	1.01854		0.563126	1.01387		0.562	1.01111		0.563126	1.00709		0.55754	1.00278
0.56513	1.02913		0.56513	1.02772		0.56513	1.02365		0.56513	1.01858		0.56513	1.01394		0.564	1.0111		0.56513	1.00698		0.559524	1.00274
0.567134	1.02903		0.567134	1.02769		0.567134	1.02367		0.567134	1.01853		0.567134	1.01387		0.566	1.01114		0.567134	1.00701		0.561508	1.00279
0.569138	1.02907		0.569138	1.02776		0.569138	1.02363		0.569138	1.01844		0.569138	1.01382		0.568	1.01109		0.569138	1.00711		0.563492	1.00283
0.571142	1.02916		0.571142	1.0277		0.571142	1.02374		0.571142	1.01837		0.571142	1.01384		0.57	1.01115		0.571142	1.00714		0.565476	1.00278
0.573146	1.02905		0.573146	1.02773		0.573146	1.02371		0.573146	1.01846		0.573146	1.0138		0.572	1.01112		0.573146	1.00703		0.56746	1.00278
0.57515	1.02904		0.57515	1.02779		0.57515	1.02364		0.57515	1.01837		0.57515	1.01376		0.574	1.01108		0.57515	1.00705		0.569444	1.0028
0.577154	1.02897		0.577154	1.02769		0.577154	1.02366		0.577154	1.01831		0.577154	1.01375		0.576	1.01106		0.577154	1.00693		0.571429	1.00279
0.579158	1.02905		0.579158	1.02774		0.579158	1.02366		0.579158	1.01834		0.579158	1.01375		0.578	1.01106		0.579158	1.00686		0.573413	1.00276
0.581162	1.02906		0.581162	1.02775		0.581162	1.02371		0.581162	1.01833		0.581162	1.01374		0.58	1.01101		0.581162	1.0069		0.575397	1.00271
0.583166	1.02904		0.583166	1.02761		0.583166	1.0235		0.583166	1.0183		0.583166	1.01368		0.582	1.011		0.583166	1.00686		0.577381	1.00275
0.58517	1.02899		0.58517	1.02771		0.58517	1.0235		0.58517	1.01833		0.58517	1.0137		0.584	1.01101		0.58517	1.00682		0.579365	1.00269
0.587174	1.029		0.587174	1.02769		0.587174	1.02347		0.587174	1.01836		0.587174	1.01374		0.586	1.01098		0.587174	1.00695		0.581349	1.00269
0.589178	1.02897		0.589178	1.02769		0.589178	1.02343		0.589178	1.01827		0.589178	1.01373		0.588	1.01085		0.589178	1.00693		0.583333	1.0027
0.591182	1.02891		0.591182	1.02766		0.591182	1.02349		0.591182	1.01822		0.591182	1.01366		0.59	1.01092		0.591182	1.00702		0.585317	1.00271
0.593186	1.02893		0.593186	1.02772		0.593186	1.02336		0.593186	1.01822		0.593186	1.01361		0.592	1.01088		0.593186	1.00687		0.587302	1.0027
0.59519	1.02886		0.59519	1.02757		0.59519	1.02343		0.59519	1.01824		0.59519	1.01364		0.594	1.01082		0.59519	1.00686		0.589286	1.00267
0.597194	1.02882		0.597194	1.02768		0.597194	1.02346		0.597194	1.01822		0.597194	1.01359		0.596	1.01082		0.597194	1.00678		0.59127	1.00261
0.599198	1.02882		0.599198	1.02756		0.599198	1.02349		0.599198	1.01813		0.599198	1.01353		0.598	1.01082		0.599198	1.0068		0.593254	1.00263
0.601202	1.02884		0.601202	1.02748		0.601202	1.02352		0.601202	1.01814		0.601202	1.01356		0.6	1.01074		0.601202	1.00675		0.595238	1.00266
0.603206	1.0288		0.603206	1.02755		0.603206	1.02347		0.603206	1.01806		0.603206	1.01354		0.602	1.0108		0.603206	1.00671		0.597222	1.00264
0.60521	1.02891		0.60521	1.02761		0.60521	1.02343		0.60521	1.01809		0.60521	1.01348		0.604	1.01079		0.60521	1.00676		0.599206	1.00261
0.607214	1.02891		0.607214	1.02749		0.607214	1.02339		0.607214	1.01809		0.607214	1.01352		0.606	1.01072		0.607214	1.00677		0.60119	1.00261
0.609218	1.02884		0.609218	1.02754		0.609218	1.02333		0.609218	1.01803		0.609218	1.0136		0.608	1.01072		0.609218	1.00666		0.603175	1.00267
0.611222	1.02885		0.611222	1.02749		0.611222	1.02324		0.611222	1.01803		0.611222	1.01346		0.61	1.01066		0.611222	1.0067		0.605159	1.00267
0.613226	1.02883		0.613226	1.02748		0.613226	1.02317		0.613226	1.018		0.613226	1.0134		0.612	1.01064		0.613226	1.00667		0.607143	1.00265
0.61523	1.02874		0.61523	1.02738		0.61523	1.02311		0.61523	1.01801		0.61523	1.01343		0.614	1.01056		0.61523	1.00661		0.609127	1.00272
0.617234	1.02875		0.617234	1.02733		0.617234	1.02311		0.617234	1.01796		0.617234	1.01335		0.616	1.01057		0.617234	1.00652		0.611111	1.00262
0.619238	1.02867		0.619238	1.0274		0.619238	1.02318		0.619238	1.01796		0.619238	1.01343		0.618	1.01051		0.619238	1.00657		0.613095	1.00263
0.621242	1.02882		0.621242	1.02743		0.621242	1.02317		0.621242	1.0179		0.621242	1.01334		0.62	1.01053		0.621242	1.00652		0.615079	1.00262
0.623246	1.02879		0.623246	1.02736		0.623246	1.0232		0.623246	1.0179		0.623246	1.01324		0.622	1.01047		0.623246	1.00646		0.617063	1.00258
0.625251	1.02898		0.625251	1.02735		0.625251	1.02307		0.625251	1.01767		0.625251	1.0133		0.624	1.0105		0.625251	1.00646		0.619048	1.0026
0.627255	1.02891		0.627255	1.0272		0.627255	1.02317		0.627255	1.0178		0.627255	1.01306		0.626	1.01052		0.627255	1.0065		0.621032	1.00258
0.629259	1.02874		0.629259	1.02731		0.629259	1.02303		0.629259	1.01774		0.629259	1.0132		0.628	1.01057		0.629259	1.00648		0.623016	1.00248
0.631263	1.02871		0.631263	1.02726		0.631263	1.02308		0.631263	1.0177		0.631263	1.0132		0.63	1.01045		0.631263	1.00643		0.625	1.00253
0.633267	1.0288		0.633267	1.02727		0.633267	1.02299		0.633267	1.01769		0.633267	1.01315		0.632	1.01045		0.633267	1.00635		0.626984	1.00255
0.635271	1.0288		0.635271	1.02724		0.635271	1.02298		0.635271	1.01757		0.635271	1.01303		0.634	1.01048		0.635271	1.00644		0.628968	1.00248
0.637275	1.02886		0.637275	1.02725		0.637275	1.02294		0.637275	1.01761		0.637275	1.01298		0.636	1.0104		0.637275	1.0064		0.630952	1.00244
0.639279	1.02878		0.639279	1.02732		0.639279	1.02288		0.639279	1.0176		0.639279	1.01296		0.638	1.01039		0.639279	1.00633		0.632937	1.00251
0.641283	1.02865		0.641283	1.0272		0.641283	1.02297		0.641283	1.01759		0.641283	1.013		0.64	1.01031		0.641283	1.00624		0.634921	1.00246
0.643287	1.02864		0.643287	1.02711		0.643287	1.02288		0.643287	1.01753		0.643287	1.013		0.642	1.01028		0.643287	1.00628		0.636905	1.00244
0.645291	1.0286		0.645291	1.02712		0.645291	1.02289		0.645291	1.01735		0.645291	1.01297		0.644	1.01026		0.645291	1.0062		0.638889	1.00255
0.647295	1.02861		0.647295	1.02702		0.647295	1.02276		0.647295	1.01741		0.647295	1.01302		0.646	1.0103		0.647295	1.00617		0.640873	1.00246
0.649299	1.0285		0.649299	1.02701		0.649299	1.0227		0.649299	1.01739		0.649299	1.01301		0.648	1.01025		0.649299	1.00621		0.642857	1.00244
0.651303	1.02844		0.651303	1.02693		0.651303	1.02271		0.651303	1.01736		0.651303	1.01291		0.65	1.0102		0.651303	1.0062		0.644841	1.00244
0.653307	1.02857		0.653307	1.02689		0.653307	1.02261		0.653307	1.01735		0.653307	1.01293		0.652	1.01012		0.653307	1.0062		0.646825	1.00246
0.655311	1.02852		0.655311	1.0269		0.655311	1.02272		0.655311	1.01734		0.655311	1.01282		0.654	1.01014		0.655311	1.0062		0.64881	1.0024
0.657315	1.02844		0.657315	1.02686		0.657315	1.02258		0.657315	1.01719		0.657315	1.01259		0.656	1.0101		0.657315	1.00619		0.650794	1.00237
0.659319	1.0284		0.659319	1.02684		0.659319	1.02242		0.659319	1.01707		0.659319	1.01263		0.658	1.01014		0.659319	1.00612		0.652778	1.00239
0.661323	1.02832		0.661323	1.02681		0.661323	1.02253		0.661323	1.01718		0.661323	1.01261		0.66	1.00994		0.661323	1.00611		0.654762	1.00238
0.663327	1.0283		0.663327	1.02671		0.663327	1.0225		0.663327	1.01707		0.663327	1.01266		0.662	1.00996		0.663327	1.006		0.656746	1.00234
0.665331	1.02826		0.665331	1.02677		0.665331	1.02248		0.665331	1.01713		0.665331	1.01246		0.664	1.00993		0.665331	1.00588		0.65873	1.0023
0.667335	1.02824		0.667335	1.0267		0.667335	1.0224		0.667335	1.01714		0.667335	1.01243		0.666	1.00992		0.667335	1.00593		0.660714	1.00237
0.669339	1.0281		0.669339	1.02668		0.669339	1.02247		0.669339	1.01711		0.669339	1.01256		0.668	1.00994		0.669339	1.00594		0.662698	1.00238
0.671343	1.02818		0.671343	1.0266		0.671343	1.02239		0.671343	1.01704		0.671343	1.01234		0.67	1.00994		0.671343	1.00597		0.664683	1.00232
0.673347	1.02806		0.673347	1.02653		0.673347	1.02233		0.673347	1.01698		0.673347	1.01232		0.672	1.00984		0.673347	1.00593		0.666667	1.0023
0.675351	1.02809		0.675351	1.0265		0.675351	1.0224		0.675351	1.01695		0.675351	1.01227		0.674	1.00975		0.675351	1.00591		0.668651	1.00234
0.677355	1.02816		0.677355	1.02653		0.677355	1.0223		0.677355	1.01686		0.677355	1.01213		0.676	1.0097		0.677355	1.00588		0.670635	1.0023
0.679359	1.02803		0.679359	1.0266		0.679359	1.0223		0.679359	1.01687		0.679359	1.012		0.678	1.0097		0.679359	1.00593		0.672619	1.00226
0.681363	1.02799		0.681363	1.02651		0.681363	1.02229		0.681363	1.01682		0.681363	1.01208		0.68	1.00971		0.681363	1.00585		0.674603	1.00231
0.683367	1.02807		0.683367	1.02648		0.683367	1.02223		0.683367	1.0167		0.683367	1.01216		0.682	1.00968		0.683367	1.00576		0.676587	1.00231
0.685371	1.02803		0.685371	1.02654		0.685371	1.0221		0.685371	1.0166		0.685371	1.01211		0.684	1.00971		0.685371	1.00568		0.678571	1.00222
0.687375	1.0279		0.687375	1.02636		0.687375	1.02214		0.687375	1.0166		0.687375	1.01206		0.686	1.00973		0.687375	1.00566		0.680556	1.00221
0.689379	1.02794		0.689379	1.02626		0.689379	1.0222		0.689379	1.01669		0.689379	1.012		0.688	1.00961		0.689379	1.0057		0.68254	1.0022
0.691383	1.02796		0.691383	1.02622		0.691383	1.02187		0.691383	1.01659		0.691383	1.01208		0.69	1.00954		0.691383	1.00576		0.684524	1.00219
0.693387	1.02785		0.693387	1.02622		0.693387	1.02181		0.693387	1.01658		0.693387	1.01202		0.692	1.00945		0.693387	1.00562		0.686508	1.00225
0.695391	1.02777		0.695391	1.02621		0.695391	1.02169		0.695391	1.01646		0.695391	1.01199		0.694	1.00936		0.695391	1.00567		0.688492	1.00222
0.697395	1.02772		0.697395	1.02614		0.697395	1.02174		0.697395	1.01644		0.697395	1.01188		0.696	1.00932		0.697395	1.00562		0.690476	1.00214
0.699399	1.02763		0.699399	1.02616		0.699399	1.02175		0.699399	1.01639		0.699399	1.01179		0.698	1.00935		0.699399	1.0055		0.69246	1.00215
0.701403	1.0278		0.701403	1.02598		0.701403	1.02171		0.701403	1.01625		0.701403	1.01173		0.7	1.00934		0.701403	1.00555		0.694444	1.00216
0.703407	1.02776		0.703407	1.02605		0.703407	1.02166		0.703407	1.01629		0.703407	1.01165		0.702	1.00927		0.703407	1.00546		0.696429	1.00208
0.705411	1.02777		0.705411	1.02614		0.705411	1.02161		0.705411	1.0162		0.705411	1.0117		0.704	1.00927		0.705411	1.00534		0.698413	1.00205
0.707415	1.0277		0.707415	1.02606		0.707415	1.02154		0.707415	1.01621		0.707415	1.01151		0.706	1.00923		0.707415	1.00535		0.700397	1.00203
0.709419	1.02763		0.709419	1.02595		0.709419	1.02161		0.709419	1.01618		0.709419	1.0116		0.708	1.00915		0.709419	1.00537		0.702381	1.00209
0.711423	1.02768		0.711423	1.02593		0.711423	1.02141		0.711423	1.0161		0.711423	1.01158		0.71	1.00914		0.711423	1.00527		0.704365	1.00209
0.713427	1.02757		0.713427	1.02588		0.713427	1.02127		0.713427	1.01591		0.713427	1.01153		0.712	1.00913		0.713427	1.00531		0.706349	1.00213
0.715431	1.02751		0.715431	1.0259		0.715431	1.02137		0.715431	1.01595		0.715431	1.0114		0.714	1.00907		0.715431	1.00521		0.708333	1.00199
0.717435	1.02749		0.717435	1.0258		0.717435	1.02138		0.717435	1.01587		0.717435	1.01139		0.716	1.00896		0.717435	1.0053		0.710317	1.00198
0.719439	1.02747		0.719439	1.02575		0.719439	1.02129		0.719439	1.01591		0.719439	1.0113		0.718	1.009		0.719439	1.00531		0.712302	1.00194
0.721443	1.02733		0.721443	1.02579		0.721443	1.02126		0.721443	1.01572		0.721443	1.01125		0.72	1.00897		0.721443	1.00525		0.714286	1.00196
0.723447	1.02749		0.723447	1.02572		0.723447	1.02129		0.723447	1.01572		0.723447	1.01113		0.722	1.00885		0.723447	1.00521		0.71627	1.00195
0.725451	1.02755		0.725451	1.02568		0.725451	1.02124		0.725451	1.01551		0.725451	1.01115		0.724	1.00883		0.725451	1.00505		0.718254	1.00193
0.727455	1.02745		0.727455	1.02559		0.727455	1.02127		0.727455	1.01549		0.727455	1.01109		0.726	1.00873		0.727455	1.00507		0.720238	1.00186
0.729459	1.02738		0.729459	1.02547		0.729459	1.02112		0.729459	1.01542		0.729459	1.01103		0.728	1.00863		0.729459	1.00513		0.722222	1.00184
0.731463	1.02739		0.731463	1.02544		0.731463	1.02099		0.731463	1.0153		0.731463	1.01093		0.73	1.00855		0.731463	1.00513		0.724206	1.00183
0.733467	1.02727		0.733467	1.02551		0.733467	1.02096		0.733467	1.01538		0.733467	1.01078		0.732	1.00852		0.733467	1.00503		0.72619	1.00181
0.735471	1.02722		0.735471	1.02538		0.735471	1.02097		0.735471	1.01523		0.735471	1.01077		0.734	1.00853		0.735471	1.00488		0.728175	1.00176
0.737475	1.02722		0.737475	1.02545		0.737475	1.02087		0.737475	1.0152		0.737475	1.0107		0.736	1.00849		0.737475	1.00488		0.730159	1.0018
0.739479	1.02715		0.739479	1.02538		0.739479	1.02087		0.739479	1.0152		0.739479	1.01068		0.738	1.00838		0.739479	1.00482		0.732143	1.00181
0.741483	1.02722		0.741483	1.0253		0.741483	1.02074		0.741483	1.01508		0.741483	1.01072		0.74	1.00841		0.741483	1.00485		0.734127	1.00184
0.743487	1.02721		0.743487	1.02529		0.743487	1.02051		0.743487	1.01495		0.743487	1.01056		0.742	1.00836		0.743487	1.00482		0.736111	1.00184
0.745491	1.02713		0.745491	1.02519		0.745491	1.02047		0.745491	1.01495		0.745491	1.01045		0.744	1.00828		0.745491	1.00472		0.738095	1.00183
0.747495	1.02703		0.747495	1.02505		0.747495	1.02044		0.747495	1.0148		0.747495	1.01032		0.746	1.00818		0.747495	1.00464		0.740079	1.00183
0.749499	1.0267		0.749499	1.025		0.749499	1.02041		0.749499	1.01473		0.749499	1.01028		0.748	1.00808		0.749499	1.00465		0.742063	1.00181
0.751503	1.02673		0.751503	1.02495		0.751503	1.02042		0.751503	1.01464		0.751503	1.01022		0.75	1.00793		0.751503	1.00453		0.744048	1.00179
0.753507	1.02669		0.753507	1.02484		0.753507	1.02038		0.753507	1.01475		0.753507	1.01024		0.752	1.00795		0.753507	1.00449		0.746032	1.00177
0.755511	1.02669		0.755511	1.02496		0.755511	1.02031		0.755511	1.01466		0.755511	1.01023		0.754	1.00794		0.755511	1.00448		0.748016	1.0018
0.757515	1.02658		0.757515	1.02492		0.757515	1.02021		0.757515	1.01448		0.757515	1.01021		0.756	1.00792		0.757515	1.00453		0.75	1.00165
0.759519	1.02661		0.759519	1.02473		0.759519	1.02014		0.759519	1.01448		0.759519	1.01004		0.758	1.00786		0.759519	1.00458		0.751984	1.00173
0.761523	1.02646		0.761523	1.02463		0.761523	1.02004		0.761523	1.01427		0.761523	1.00991		0.76	1.00779		0.761523	1.00446		0.753968	1.00171
0.763527	1.02654		0.763527	1.02448		0.763527	1.02008		0.763527	1.01421		0.763527	1.00975		0.762	1.00773		0.763527	1.00441		0.755952	1.00165
0.765531	1.02659		0.765531	1.0246		0.765531	1.01996		0.765531	1.01434		0.765531	1.00984		0.764	1.00769		0.765531	1.00435		0.757937	1.00159
0.767535	1.0265		0.767535	1.0244		0.767535	1.0199		0.767535	1.01424		0.767535	1.00976		0.766	1.00762		0.767535	1.00423		0.759921	1.00159
0.769539	1.02648		0.769539	1.0244		0.769539	1.01967		0.769539	1.01403		0.769539	1.00979		0.768	1.00755		0.769539	1.00421		0.761905	1.00156
0.771543	1.02635		0.771543	1.02432		0.771543	1.01957		0.771543	1.01409		0.771543	1.00969		0.77	1.00761		0.771543	1.00422		0.763889	1.00156
0.773547	1.02626		0.773547	1.02425		0.773547	1.01963		0.773547	1.01392		0.773547	1.00959		0.772	1.00751		0.773547	1.00412		0.765873	1.0015
0.775551	1.02626		0.775551	1.02419		0.775551	1.01955		0.775551	1.01381		0.775551	1.00949		0.774	1.00747		0.775551	1.00403		0.767857	1.00149
0.777555	1.02619		0.777555	1.02423		0.777555	1.01942		0.777555	1.0138		0.777555	1.00943		0.776	1.00735		0.777555	1.00405		0.769841	1.00149
0.779559	1.02615		0.779559	1.02423		0.779559	1.0194		0.779559	1.01368		0.779559	1.00937		0.778	1.00727		0.779559	1.00398		0.771825	1.00146
0.781563	1.02605		0.781563	1.02414		0.781563	1.01932		0.781563	1.01356		0.781563	1.00928		0.78	1.00717		0.781563	1.0039		0.77381	1.00139
0.783567	1.02608		0.783567	1.02401		0.783567	1.01919		0.783567	1.01359		0.783567	1.00926		0.782	1.00714		0.783567	1.00378		0.775794	1.00134
0.785571	1.02586		0.785571	1.02387		0.785571	1.01914		0.785571	1.0134		0.785571	1.00909		0.784	1.00709		0.785571	1.00374		0.777778	1.00136
0.787575	1.02589		0.787575	1.02393		0.787575	1.01915		0.787575	1.01331		0.787575	1.00904		0.786	1.0071		0.787575	1.00377		0.779762	1.00131
0.789579	1.02572		0.789579	1.02377		0.789579	1.01901		0.789579	1.01327		0.789579	1.00898		0.788	1.00703		0.789579	1.00377		0.781746	1.00136
0.791583	1.02576		0.791583	1.02371		0.791583	1.01877		0.791583	1.01305		0.791583	1.00885		0.79	1.00703		0.791583	1.00379		0.78373	1.00132
0.793587	1.02569		0.793587	1.02367		0.793587	1.01874		0.793587	1.01285		0.793587	1.00886		0.792	1.00685		0.793587	1.00369		0.785714	1.00134
0.795591	1.0255		0.795591	1.02364		0.795591	1.01854		0.795591	1.01285		0.795591	1.0087		0.794	1.00687		0.795591	1.00357		0.787698	1.00134
0.797595	1.02545		0.797595	1.02341		0.797595	1.01858		0.797595	1.01288		0.797595	1.00872		0.796	1.00681		0.797595	1.0036		0.789683	1.0013
0.799599	1.02527		0.799599	1.02331		0.799599	1.01838		0.799599	1.01286		0.799599	1.00861		0.798	1.00682		0.799599	1.00362		0.791667	1.00131
0.801603	1.02526		0.801603	1.0232		0.801603	1.01836		0.801603	1.01262		0.801603	1.00844		0.8	1.00672		0.801603	1.00354		0.793651	1.00128
0.803607	1.02519		0.803607	1.02315		0.803607	1.0181		0.803607	1.01254		0.803607	1.00837		0.802	1.00668		0.803607	1.00347		0.795635	1.00123
0.805611	1.02501		0.805611	1.02322		0.805611	1.01816		0.805611	1.01245		0.805611	1.00834		0.804	1.00655		0.805611	1.00346		0.797619	1.00127
0.807615	1.02492		0.807615	1.02311		0.807615	1.01812		0.807615	1.01228		0.807615	1.0083		0.806	1.00645		0.807615	1.00341		0.799603	1.00121
0.809619	1.02496		0.809619	1.023		0.809619	1.01802		0.809619	1.01236		0.809619	1.00813		0.808	1.00637		0.809619	1.00343		0.801587	1.00121
0.811623	1.02488		0.811623	1.0228		0.811623	1.01787		0.811623	1.01229		0.811623	1.00802		0.81	1.00629		0.811623	1.00338		0.803571	1.00118
0.813627	1.02488		0.813627	1.02271		0.813627	1.01778		0.813627	1.01219		0.813627	1.00794		0.812	1.00623		0.813627	1.00337		0.805556	1.00114
0.815631	1.02482		0.815631	1.02262		0.815631	1.01766		0.815631	1.01222		0.815631	1.00787		0.814	1.00614		0.815631	1.00336		0.80754	1.0011
0.817635	1.02465		0.817635	1.02251		0.817635	1.01757		0.817635	1.01199		0.817635	1.00786		0.816	1.00617		0.817635	1.00323		0.809524	1.00114
0.819639	1.02453		0.819639	1.02236		0.819639	1.01746		0.819639	1.01189		0.819639	1.00771		0.818	1.00613		0.819639	1.00314		0.811508	1.00104
0.821643	1.02449		0.821643	1.02237		0.821643	1.01741		0.821643	1.01174		0.821643	1.00773		0.82	1.00598		0.821643	1.00308		0.813492	1.00108
0.823647	1.02437		0.823647	1.02223		0.823647	1.0172		0.823647	1.01164		0.823647	1.00767		0.822	1.00593		0.823647	1.00299		0.815476	1.00105
0.825651	1.02432		0.825651	1.02223		0.825651	1.0171		0.825651	1.01167		0.825651	1.00762		0.824	1.00585		0.825651	1.00305		0.81746	1.0011
0.827655	1.02427		0.827655	1.02204		0.827655	1.01703		0.827655	1.01149		0.827655	1.00752		0.826	1.00574		0.827655	1.00295		0.819444	1.00106
0.829659	1.02407		0.829659	1.02194		0.829659	1.01684		0.829659	1.0114		0.829659	1.00736		0.828	1.00576		0.829659	1.00291		0.821429	1.00105
0.831663	1.02405		0.831663	1.02186		0.831663	1.01668		0.831663	1.01113		0.831663	1.00723		0.83	1.00559		0.831663	1.00293		0.823413	1.00105
0.833667	1.02389		0.833667	1.02179		0.833667	1.01657		0.833667	1.01103		0.833667	1.00724		0.832	1.00549		0.833667	1.00278		0.825397	1.00094
0.835671	1.02383		0.835671	1.02173		0.835671	1.01669		0.835671	1.01087		0.835671	1.00725		0.834	1.00556		0.835671	1.00271		0.827381	1.00093
0.837675	1.02372		0.837675	1.02163		0.837675	1.01642		0.837675	1.0108		0.837675	1.00722		0.836	1.0055		0.837675	1.00275		0.829365	1.00089
0.839679	1.02365		0.839679	1.02151		0.839679	1.0163		0.839679	1.01085		0.839679	1.00697		0.838	1.00544		0.839679	1.00271		0.831349	1.00085
0.841683	1.02351		0.841683	1.02148		0.841683	1.01612		0.841683	1.0107		0.841683	1.0068		0.84	1.0053		0.841683	1.00264		0.833333	1.00083
0.843687	1.02347		0.843687	1.02128		0.843687	1.01596		0.843687	1.01048		0.843687	1.0067		0.842	1.00528		0.843687	1.00255		0.835317	1.00093
0.845691	1.02336		0.845691	1.02106		0.845691	1.0158		0.845691	1.01038		0.845691	1.00659		0.844	1.00521		0.845691	1.00246		0.837302	1.00094
0.847695	1.02323		0.847695	1.02094		0.847695	1.01586		0.847695	1.01019		0.847695	1.00653		0.846	1.00506		0.847695	1.00248		0.839286	1.00084
0.849699	1.023		0.849699	1.02081		0.849699	1.01565		0.849699	1.01008		0.849699	1.00646		0.848	1.00498		0.849699	1.00235		0.84127	1.00088
0.851703	1.02305		0.851703	1.02068		0.851703	1.01546		0.851703	1.00998		0.851703	1.00643		0.85	1.00495		0.851703	1.00226		0.843254	1.0008
0.853707	1.02291		0.853707	1.0206		0.853707	1.01537		0.853707	1.00983		0.853707	1.00618		0.852	1.00498		0.853707	1.00227		0.845238	1.00076
0.855711	1.02279		0.855711	1.02043		0.855711	1.01527		0.855711	1.0097		0.855711	1.00616		0.854	1.00494		0.855711	1.00208		0.847222	1.00069
0.857715	1.02265		0.857715	1.02021		0.857715	1.01509		0.857715	1.00959		0.857715	1.00608		0.856	1.00486		0.857715	1.00215		0.849206	1.00077
0.859719	1.02247		0.859719	1.02017		0.859719	1.01492		0.859719	1.00954		0.859719	1.00593		0.858	1.0047		0.859719	1.00215		0.85119	1.00072
0.861723	1.02233		0.861723	1.02		0.861723	1.01483		0.861723	1.00944		0.861723	1.00584		0.86	1.00462		0.861723	1.00212		0.853175	1.00067
0.863727	1.02225		0.863727	1.01981		0.863727	1.0146		0.863727	1.00913		0.863727	1.00564		0.862	1.00445		0.863727	1.00207		0.855159	1.00069
0.865731	1.02215		0.865731	1.01964		0.865731	1.01438		0.865731	1.00903		0.865731	1.00559		0.864	1.0044		0.865731	1.00204		0.857143	1.00067
0.867735	1.02195		0.867735	1.01951		0.867735	1.0142		0.867735	1.00891		0.867735	1.00551		0.866	1.00426		0.867735	1.00201		0.859127	1.00072
0.869739	1.02171		0.869739	1.01946		0.869739	1.01405		0.869739	1.00874		0.869739	1.00537		0.868	1.00427		0.869739	1.00185		0.861111	1.00068
0.871743	1.02159		0.871743	1.01931		0.871743	1.01386		0.871743	1.0087		0.871743	1.00531		0.87	1.00422		0.871743	1.00186		0.863095	1.00068
0.873747	1.02143		0.873747	1.01913		0.873747	1.01372		0.873747	1.00853		0.873747	1.00522		0.872	1.00419		0.873747	1.00173		0.865079	1.00072
0.875752	1.02124		0.875752	1.01897		0.875752	1.01366		0.875752	1.00834		0.875752	1.00513		0.874	1.00407		0.875752	1.00168		0.867063	1.00061
0.877756	1.02119		0.877756	1.01871		0.877756	1.0135		0.877756	1.00815		0.877756	1.005		0.876	1.004		0.877756	1.00161		0.869048	1.0007
0.87976	1.02095		0.87976	1.01837		0.87976	1.01338		0.87976	1.00807		0.87976	1.00483		0.878	1.00385		0.87976	1.00158		0.871032	1.0006
0.881764	1.0209		0.881764	1.01831		0.881764	1.01326		0.881764	1.00794		0.881764	1.00488		0.88	1.00379		0.881764	1.00152		0.873016	1.00057
0.883768	1.02064		0.883768	1.0182		0.883768	1.01307		0.883768	1.00777		0.883768	1.00477		0.882	1.00367		0.883768	1.0015		0.875	1.00057
0.885772	1.02034		0.885772	1.01804		0.885772	1.01282		0.885772	1.00763		0.885772	1.0046		0.884	1.00361		0.885772	1.0015		0.876984	1.00047
0.887776	1.02019		0.887776	1.01784		0.887776	1.01259		0.887776	1.00754		0.887776	1.00455		0.886	1.00352		0.887776	1.00146		0.878968	1.00044
0.88978	1.02019		0.88978	1.01766		0.88978	1.0124		0.88978	1.00744		0.88978	1.00432		0.888	1.00348		0.88978	1.00134		0.880952	1.0005
0.891784	1.01993		0.891784	1.01751		0.891784	1.01237		0.891784	1.0073		0.891784	1.0043		0.89	1.00344		0.891784	1.00132		0.882937	1.00047
0.893788	1.01989		0.893788	1.01728		0.893788	1.01218		0.893788	1.00722		0.893788	1.00424		0.892	1.00335		0.893788	1.0013		0.884921	1.00049
0.895792	1.01958		0.895792	1.01704		0.895792	1.01186		0.895792	1.00711		0.895792	1.00404		0.894	1.00325		0.895792	1.00122		0.886905	1.00051
0.897796	1.01933		0.897796	1.01673		0.897796	1.01166		0.897796	1.00688		0.897796	1.00387		0.896	1.0032		0.897796	1.0012		0.888889	1.00042
0.8998	1.01918		0.8998	1.01649		0.8998	1.01147		0.8998	1.00686		0.8998	1.0039		0.898	1.00302		0.8998	1.0012		0.890873	1.00035
0.901804	1.01899		0.901804	1.01639		0.901804	1.01135		0.901804	1.00654		0.901804	1.00382		0.9	1.00301		0.901804	1.00108		0.892857	1.00042
0.903808	1.01873		0.903808	1.01616		0.903808	1.01107		0.903808	1.00643		0.903808	1.00366		0.902	1.0029		0.903808	1.00104		0.894841	1.00033
0.905812	1.01843		0.905812	1.01583		0.905812	1.01088		0.905812	1.00621		0.905812	1.00359		0.904	1.00282		0.905812	1.00108		0.896825	1.00036
0.907816	1.01817		0.907816	1.01567		0.907816	1.01064		0.907816	1.0061		0.907816	1.00333		0.906	1.00276		0.907816	1.00105		0.89881	1.0004
0.90982	1.01791		0.90982	1.0155		0.90982	1.0104		0.90982	1.00599		0.90982	1.00311		0.908	1.00262		0.90982	1.00099		0.900794	1.00036
0.911824	1.01763		0.911824	1.01515		0.911824	1.01003		0.911824	1.0057		0.911824	1.00308		0.91	1.00255		0.911824	1.00089		0.902778	1.0003
0.913828	1.01729		0.913828	1.01494		0.913828	1.00993		0.913828	1.00556		0.913828	1.00292		0.912	1.00239		0.913828	1.00089		0.904762	1.00022
0.915832	1.01706		0.915832	1.01466		0.915832	1.00972		0.915832	1.00548		0.915832	1.00294		0.914	1.00243		0.915832	1.00088		0.906746	1.00024
0.917836	1.01674		0.917836	1.01429		0.917836	1.00944		0.917836	1.00523		0.917836	1.00281		0.916	1.00241		0.917836	1.00074		0.90873	1.00026
0.91984	1.01635		0.91984	1.01419		0.91984	1.0092		0.91984	1.00506		0.91984	1.00258		0.918	1.00224		0.91984	1.00065		0.910714	1.0003
0.921844	1.01604		0.921844	1.01389		0.921844	1.00901		0.921844	1.00492		0.921844	1.00259		0.92	1.00215		0.921844	1.00058		0.912698	1.00029
0.923848	1.01587		0.923848	1.0136		0.923848	1.00875		0.923848	1.00484		0.923848	1.00241		0.922	1.00196		0.923848	1.00055		0.914683	1.00025
0.925852	1.01543		0.925852	1.01319		0.925852	1.00845		0.925852	1.00469		0.925852	1.00229		0.924	1.00195		0.925852	1.00053		0.916667	1.00021
0.927856	1.01514		0.927856	1.01296		0.927856	1.0083		0.927856	1.00454		0.927856	1.00218		0.926	1.00176		0.927856	1.00042		0.918651	1.00018
0.92986	1.0147		0.92986	1.01276		0.92986	1.00794		0.92986	1.00446		0.92986	1.00217		0.928	1.00184		0.92986	1.00055		0.920635	1.00015
0.931864	1.01434		0.931864	1.01243		0.931864	1.00776		0.931864	1.00413		0.931864	1.00198		0.93	1.00177		0.931864	1.00043		0.922619	1.00018
0.933868	1.01407		0.933868	1.01206		0.933868	1.00747		0.933868	1.00389		0.933868	1.00186		0.932	1.00167		0.933868	1.00043		0.924603	1.00015
0.935872	1.01372		0.935872	1.01174		0.935872	1.0072		0.935872	1.00369		0.935872	1.00172		0.934	1.00168		0.935872	1.00041		0.926587	1.00019
0.937876	1.01334		0.937876	1.01133		0.937876	1.00697		0.937876	1.00357		0.937876	1.00155		0.936	1.0016		0.937876	1.00036		0.928571	1.00019
0.93988	1.01289		0.93988	1.01107		0.93988	1.00674		0.93988	1.00349		0.93988	1.00145		0.938	1.00146		0.93988	1.00026		0.930556	1.00014
0.941884	1.0125		0.941884	1.01062		0.941884	1.00655		0.941884	1.00327		0.941884	1.00144		0.94	1.00132		0.941884	1.00027		0.93254	1.00007
0.943888	1.01223		0.943888	1.01025		0.943888	1.00618		0.943888	1.00291		0.943888	1.00135		0.942	1.00129		0.943888	1.00026		0.934524	1.00023
0.945892	1.01172		0.945892	1.00988		0.945892	1.00591		0.945892	1.0028		0.945892	1.00122		0.944	1.00115		0.945892	1.0002		0.936508	1.00019
0.947896	1.01131		0.947896	1.00943		0.947896	1.00561		0.947896	1.00262		0.947896	1.00117		0.946	1.00111		0.947896	1.00011		0.938492	1.00015
0.9499	1.01073		0.9499	1.00908		0.9499	1.00538		0.9499	1.00257		0.9499	1.00092		0.948	1.00097		0.9499	1.00016		0.940476	1.00011
0.951904	1.01038		0.951904	1.00863		0.951904	1.00513		0.951904	1.00242		0.951904	1.00079		0.95	1.00092		0.951904	1.00007		0.94246	1.00011
0.953908	1.00988		0.953908	1.00817		0.953908	1.00481		0.953908	1.00224		0.953908	1.00077		0.952	1.00093		0.953908	1.00003		0.944444	1.00011
0.955912	1.00933		0.955912	1.00778		0.955912	1.00452		0.955912	1.002		0.955912	1.00084		0.954	1.00087		0.955912	0.999977		0.946429	1.00008
0.957916	1.00879		0.957916	1.00744		0.957916	1.00423		0.957916	1.00186		0.957916	1.00068		0.956	1.00091		0.957916	0.999899		0.948413	1.00012
0.95992	1.00823		0.95992	1.00698		0.95992	1.00394		0.95992	1.00164		0.95992	1.00051		0.958	1.00071		0.95992	0.999946		0.950397	1.00013
0.961924	1.00767		0.961924	1.0065		0.961924	1.00363		0.961924	1.00152		0.961924	1.00042		0.96	1.00074		0.961924	0.999943		0.952381	1.00006
0.963928	1.00713		0.963928	1.00605		0.963928	1.00328		0.963928	1.00119		0.963928	1.00033		0.962	1.00064		0.963928	0.999908		0.954365	1.00002
0.965932	1.00657		0.965932	1.00558		0.965932	1.00295		0.965932	1.00116		0.965932	1.00026		0.964	1.00051		0.965932	0.999854		0.956349	1.00001
0.967936	1.00582		0.967936	1.00508		0.967936	1.00268		0.967936	1.001		0.967936	1.00022		0.966	1.00046		0.967936	0.999863		0.958333	1.00003
0.96994	1.00523		0.96994	1.00456		0.96994	1.0023		0.96994	1.00089		0.96994	1.00013		0.968	1.0004		0.96994	0.999733		0.960317	0.999989
0.971944	1.00464		0.971944	1.00426		0.971944	1.00207		0.971944	1.00065		0.971944	1.00007		0.97	1.00041		0.971944	0.999874		0.962302	1.00004
0.973948	1.00408		0.973948	1.00379		0.973948	1.00182		0.973948	1.00061		0.973948	1.00009		0.972	1.00034		0.973948	0.999865		0.964286	1.00004
0.975952	1.00342		0.975952	1.00329		0.975952	1.00155		0.975952	1.00046		0.975952	1.00007		0.974	1.00034		0.975952	0.999707		0.96627	0.999988
0.977956	1.00278		0.977956	1.0028		0.977956	1.00128		0.977956	1.00038		0.977956	1.00003		0.976	1.00029		0.977956	0.999827		0.968254	0.999965
0.97996	1.0022		0.97996	1.00231		0.97996	1.00096		0.97996	1.00023		0.97996	0.999993		0.978	1.00021		0.97996	0.999768		0.970238	0.999927
0.981964	1.00172		0.981964	1.00177		0.981964	1.00079		0.981964	1.00024		0.981964	0.999783		0.98	1.00012		0.981964	0.999754		0.972222	0.999945
0.983968	1.00112		0.983968	1.00146		0.983968	1.0006		0.983968	1.00015		0.983968	0.999868		0.982	1.00005		0.983968	0.999771		0.974206	0.999996
0.985972	1.00069		0.985972	1.00111		0.985972	1.00049		0.985972	0.999909		0.985972	0.999752		0.984	1.00005		0.985972	0.999678		0.97619	0.999907
0.987976	1.00034		0.987976	1.00082		0.987976	1.00037		0.987976	0.999807		0.987976	0.999752		0.986	1.0001		0.987976	0.999679		0.978175	0.999886
0.98998	1.00005		0.98998	1.00062		0.98998	1.00013		0.98998	0.999731		0.98998	0.999729		0.988	1.00002		0.98998	0.999696		0.980159	1.00003
0.991984	0.999746		0.991984	1.00044		0.991984	0.999987		0.991984	0.999757		0.991984	0.999795		0.99	1.00001		0.991984	0.999697		0.982143	0.999974
0.993988	0.999751		0.993988	1.00027		0.993988	0.999794		0.993988	0.999871		0.993988	0.999742		0.992	0.999991		0.993988	0.999733		0.984127	0.999965
0.995992	0.999926		0.995992	1.00013		0.995992	0.999803		0.995992	0.999814		0.995992	0.999738		0.994	1.00005		0.995992	0.999644		0.986111	0.999962
0.997996	1.0002		0.997996	1.0002		0.997996	0.999762		0.997996	0.999849		0.997996	0.999745		0.996	1.00004		0.997996	0.999813		0.988095	0.999985
1	1.0007		1	1.00032		1	0.999786		1	0.999918		1	0.999648		0.998	1.00004		1	0.999758		0.990079	0.999992
1.002	1.00139		1.002	1.00068		1.002	0.999825		1.002	0.99993		1.002	0.999619		1	1.00008		1.002	0.999765		0.992063	1.00003
1.00401	1.00222		1.00401	1.00103		1.00401	1.00004		1.00401	0.999973		1.00401	0.999607		1.002	1		1.00401	0.999754		0.994048	1.00008
1.00601	1.00302		1.00601	1.00134		1.00601	1.0002		1.00601	1.00013		1.00601	0.999706		1.004	1.00001		1.00601	0.999769		0.996032	1.00002
1.00802	1.00377		1.00802	1.00196		1.00802	1.00039		1.00802	1.00023		1.00802	0.999783		1.006	1.00001		1.00802	0.999822		0.998016	0.999981
1.01002	1.00474		1.01002	1.00242		1.01002	1.0006		1.01002	1.00018		1.01002	0.999891		1.008	1		1.01002	0.999771		1	1
1.01202	1.00568		1.01202	1.00307		1.01202	1.00086		1.01202	1.00041		1.01202	0.999941		1.01	1.00009		1.01202	0.999847		1.00198	1.00002
1.01403	1.00657		1.01403	1.00376		1.01403	1.00114		1.01403	1.00055		1.01403	1.00002		1.012	1.00007		1.01403	0.999849		1.00397	1.00001
1.01603	1.00745		1.01603	1.00435		1.01603	1.00159		1.01603	1.00073		1.01603	1.00013		1.014	1.00009		1.01603	0.99981		1.00595	1.00008
1.01804	1.00831		1.01804	1.00502		1.01804	1.00192		1.01804	1.00083		1.01804	1.00018		1.016	1.00001		1.01804	0.999753		1.00794	1.00004
1.02004	1.00895		1.02004	1.00565		1.02004	1.00239		1.02004	1.00108		1.02004	1.00026		1.018	1.00015		1.02004	0.999873		1.00992	0.999994
1.02204	1.00962		1.02204	1.00627		1.02204	1.00272		1.02204	1.00113		1.02204	1.00047		1.02	1.00008		1.02204	0.99994		1.0119	1.00004
1.02405	1.01031		1.02405	1.00694		1.02405	1.00306		1.02405	1.00134		1.02405	1.00061		1.022	1.00004		1.02405	0.999963		1.01389	1.00004
1.02605	1.01094		1.02605	1.00761		1.02605	1.00336		1.02605	1.0016		1.02605	1.0006		1.024	1.00025		1.02605	0.999997		1.01587	1.00003
1.02806	1.01162		1.02806	1.00813		1.02806	1.00378		1.02806	1.00169		1.02806	1.0007		1.026	1.00027		1.02806	1.00002		1.01786	1.00007
1.03006	1.01199		1.03006	1.00866		1.03006	1.00427		1.03006	1.00196		1.03006	1.00075		1.028	1.00029		1.03006	1.00002		1.01984	1.00008
1.03206	1.01254		1.03206	1.00921		1.03206	1.00454		1.03206	1.00214		1.03206	1.00089		1.03	1.00026		1.03206	1		1.02183	1.00004
1.03407	1.01303		1.03407	1.00962		1.03407	1.00481		1.03407	1.00233		1.03407	1.00102		1.032	1.00045		1.03407	1.00008		1.02381	1.00005
1.03607	1.01352		1.03607	1.01012		1.03607	1.00521		1.03607	1.0027		1.03607	1.00116		1.034	1.00049		1.03607	1.00005		1.02579	1.00004
1.03808	1.01391		1.03808	1.01052		1.03808	1.00554		1.03808	1.00274		1.03808	1.00139		1.036	1.00063		1.03808	1.00016		1.02778	0.99999
1.04008	1.01432		1.04008	1.01092		1.04008	1.00572		1.04008	1.00315		1.04008	1.00137		1.038	1.0006		1.04008	1.00011		1.02976	1.00003
1.04208	1.01473		1.04208	1.01141		1.04208	1.00616		1.04208	1.00318		1.04208	1.00144		1.04	1.00061		1.04208	1.00017		1.03175	1.00002
1.04409	1.015		1.04409	1.01158		1.04409	1.00645		1.04409	1.00333		1.04409	1.00156		1.042	1.00073		1.04409	1.00025		1.03373	1.00001
1.04609	1.01544		1.04609	1.01189		1.04609	1.00682		1.04609	1.00346		1.04609	1.00171		1.044	1.00072		1.04609	1.00025		1.03571	1.00001
1.0481	1.01568		1.0481	1.01229		1.0481	1.00712		1.0481	1.00369		1.0481	1.00195		1.046	1.00087		1.0481	1.0003		1.0377	1.00006
1.0501	1.01601		1.0501	1.01258		1.0501	1.00744		1.0501	1.00391		1.0501	1.00201		1.048	1.00098		1.0501	1.00024		1.03968	1.00008
1.0521	1.01637		1.0521	1.01295		1.0521	1.00768		1.0521	1.00398		1.0521	1.00216		1.05	1.0011		1.0521	1.00029		1.04167	1.00006
1.05411	1.01651		1.05411	1.01335		1.05411	1.00792		1.05411	1.00425		1.05411	1.00233		1.052	1.00116		1.05411	1.00039		1.04365	0.999992
1.05611	1.01693		1.05611	1.01361		1.05611	1.00812		1.05611	1.00445		1.05611	1.00236		1.054	1.00114		1.05611	1.00039		1.04563	1.00002
1.05812	1.01716		1.05812	1.0139		1.05812	1.00845		1.05812	1.00458		1.05812	1.00243		1.056	1.00121		1.05812	1.00047		1.04762	1.00001
1.06012	1.01739		1.06012	1.01409		1.06012	1.00876		1.06012	1.00479		1.06012	1.00264		1.058	1.00132		1.06012	1.0005		1.0496	1.00008
1.06212	1.01765		1.06212	1.01449		1.06212	1.0091		1.06212	1.00495		1.06212	1.0027		1.06	1.00143		1.06212	1.00051		1.05159	1.00012
1.06413	1.01794		1.06413	1.01475		1.06413	1.0092		1.06413	1.00518		1.06413	1.00274		1.062	1.00154		1.06413	1.00054		1.05357	1.0001
1.06613	1.01829		1.06613	1.01502		1.06613	1.00939		1.06613	1.00536		1.06613	1.00282		1.064	1.00149		1.06613	1.00052		1.05556	1.0001
1.06814	1.0186		1.06814	1.01522		1.06814	1.00959		1.06814	1.00534		1.06814	1.00295		1.066	1.00172		1.06814	1.00068		1.05754	1.00015
1.07014	1.01867		1.07014	1.01544		1.07014	1.00994		1.07014	1.0056		1.07014	1.00304		1.068	1.00176		1.07014	1.0007		1.05952	1.00004
1.07214	1.01895		1.07214	1.01567		1.07214	1.01007		1.07214	1.00573		1.07214	1.00328		1.07	1.00171		1.07214	1.00072		1.06151	1.00005
1.07415	1.01919		1.07415	1.01577		1.07415	1.01025		1.07415	1.00594		1.07415	1.0033		1.072	1.00188		1.07415	1.00085		1.06349	0.99999
1.07615	1.01943		1.07615	1.01587		1.07615	1.01047		1.07615	1.0061		1.07615	1.00334		1.074	1.00192		1.07615	1.00083		1.06548	1.00009
1.07816	1.01959		1.07816	1.0162		1.07816	1.01084		1.07816	1.00632		1.07816	1.00341		1.076	1.00201		1.07816	1.00083		1.06746	1.00009
1.08016	1.01982		1.08016	1.01638		1.08016	1.011		1.08016	1.0065		1.08016	1.00356		1.078	1.00201		1.08016	1.00089		1.06944	1.00008
1.08216	1.02008		1.08216	1.01668		1.08216	1.01114		1.08216	1.00661		1.08216	1.00364		1.08	1.00203		1.08216	1.00101		1.07143	1.00008
1.08417	1.02022		1.08417	1.01691		1.08417	1.01134		1.08417	1.00663		1.08417	1.00371		1.082	1.00211		1.08417	1.00098		1.07341	1.00015
1.08617	1.02031		1.08617	1.01718		1.08617	1.01153		1.08617	1.00687		1.08617	1.00384		1.084	1.00218		1.08617	1.00104		1.0754	1.00019
1.08818	1.0205		1.08818	1.01737		1.08818	1.01168		1.08818	1.00703		1.08818	1.00395		1.086	1.00234		1.08818	1.00108		1.07738	1.0002
1.09018	1.02063		1.09018	1.01752		1.09018	1.01189		1.09018	1.00713		1.09018	1.00414		1.088	1.00238		1.09018	1.0011		1.07937	1.00018
1.09218	1.02078		1.09218	1.01777		1.09218	1.01203		1.09218	1.00722		1.09218	1.00422		1.09	1.00244		1.09218	1.00107		1.08135	1.00013
1.09419	1.02102		1.09419	1.01798		1.09419	1.01218		1.09419	1.00726		1.09419	1.00417		1.092	1.00253		1.09419	1.00109		1.08333	1.0001
1.09619	1.02112		1.09619	1.01813		1.09619	1.01245		1.09619	1.00756		1.09619	1.00428		1.094	1.00261		1.09619	1.00104		1.08532	1.00024
1.0982	1.0213		1.0982	1.0184		1.0982	1.01262		1.0982	1.00762		1.0982	1.00429		1.096	1.0027		1.0982	1.00117		1.0873	1.00021
1.1002	1.0215		1.1002	1.01855		1.1002	1.01293		1.1002	1.00784		1.1002	1.00441		1.098	1.0027		1.1002	1.00122		1.08929	1.00012
1.1022	1.02155		1.1022	1.01863		1.1022	1.01305		1.1022	1.00794		1.1022	1.00448		1.1	1.00289		1.1022	1.00129		1.09127	1.00016
1.10421	1.02173		1.10421	1.01885		1.10421	1.01323		1.10421	1.0081		1.10421	1.00462		1.102	1.00293		1.10421	1.00137		1.09325	1.00023
1.10621	1.02181		1.10621	1.01899		1.10621	1.01343		1.10621	1.00836		1.10621	1.00483		1.104	1.00303		1.10621	1.0014		1.09524	1.00018
1.10822	1.02204		1.10822	1.01905		1.10822	1.01357		1.10822	1.00853		1.10822	1.00498		1.106	1.00307		1.10822	1.00145		1.09722	1.00021
1.11022	1.02211		1.11022	1.01925		1.11022	1.01376		1.11022	1.00864		1.11022	1.00495		1.108	1.00311		1.11022	1.00148		1.09921	1.00025
1.11222	1.02237		1.11222	1.01951		1.11222	1.01384		1.11222	1.00864		1.11222	1.00504		1.11	1.00327		1.11222	1.00152		1.10119	1.00026
1.11423	1.02261		1.11423	1.01963		1.11423	1.014		1.11423	1.00871		1.11423	1.00525		1.112	1.00327		1.11423	1.00163		1.10317	1.00025
1.11623	1.02265		1.11623	1.0197		1.11623	1.01415		1.11623	1.00883		1.11623	1.00519		1.114	1.0033		1.11623	1.00162		1.10516	1.00034
1.11824	1.02291		1.11824	1.01986		1.11824	1.01433		1.11824	1.00894		1.11824	1.00538		1.116	1.00334		1.11824	1.00161		1.10714	1.0004
1.12024	1.02296		1.12024	1.02021		1.12024	1.01446		1.12024	1.00916		1.12024	1.00557		1.118	1.00349		1.12024	1.00168		1.10913	1.0003
1.12224	1.02308		1.12224	1.02014		1.12224	1.01467		1.12224	1.0093		1.12224	1.00562		1.12	1.00358		1.12224	1.00172		1.11111	1.00034
1.12425	1.02318		1.12425	1.02025		1.12425	1.01478		1.12425	1.00939		1.12425	1.00565		1.122	1.00361		1.12425	1.00175		1.1131	1.00039
1.12625	1.0232		1.12625	1.02046		1.12625	1.01482		1.12625	1.00944		1.12625	1.00577		1.124	1.00366		1.12625	1.00168		1.11508	1.00042
1.12826	1.02335		1.12826	1.02055		1.12826	1.01495		1.12826	1.00954		1.12826	1.00586		1.126	1.00382		1.12826	1.00168		1.11706	1.00046
1.13026	1.02338		1.13026	1.02078		1.13026	1.01508		1.13026	1.00971		1.13026	1.00593		1.128	1.00386		1.13026	1.00177		1.11905	1.00046
1.13226	1.02345		1.13226	1.02086		1.13226	1.01514		1.13226	1.00985		1.13226	1.00601		1.13	1.00388		1.13226	1.00185		1.12103	1.00038
1.13427	1.02357		1.13427	1.02099		1.13427	1.01541		1.13427	1.01001		1.13427	1.00608		1.132	1.004		1.13427	1.00194		1.12302	1.00044
1.13627	1.02363		1.13627	1.02122		1.13627	1.01558		1.13627	1.01005		1.13627	1.00615		1.134	1.00408		1.13627	1.00203		1.125	1.00043
1.13828	1.02387		1.13828	1.0213		1.13828	1.01568		1.13828	1.01025		1.13828	1.00625		1.136	1.00408		1.13828	1.00207		1.12698	1.0005
1.14028	1.02403		1.14028	1.02152		1.14028	1.01579		1.14028	1.01034		1.14028	1.00634		1.138	1.00416		1.14028	1.00209		1.12897	1.00049
1.14228	1.02406		1.14228	1.02157		1.14228	1.01597		1.14228	1.01039		1.14228	1.00637		1.14	1.00422		1.14228	1.0021		1.13095	1.0005
1.14429	1.0242		1.14429	1.02164		1.14429	1.01618		1.14429	1.01057		1.14429	1.00644		1.142	1.0042		1.14429	1.00219		1.13294	1.00046
1.14629	1.02426		1.14629	1.02155		1.14629	1.01623		1.14629	1.01061		1.14629	1.00656		1.144	1.00429		1.14629	1.00227		1.13492	1.00055
1.1483	1.0243		1.1483	1.02185		1.1483	1.01629		1.1483	1.01066		1.1483	1.0067		1.146	1.00444		1.1483	1.00236		1.1369	1.00051
1.1503	1.02441		1.1503	1.02184		1.1503	1.01654		1.1503	1.0107		1.1503	1.00672		1.148	1.00456		1.1503	1.00234		1.13889	1.00055
1.1523	1.02457		1.1523	1.02197		1.1523	1.01659		1.1523	1.01086		1.1523	1.00682		1.15	1.00454		1.1523	1.0024		1.14087	1.00058
1.15431	1.02459		1.15431	1.02215		1.15431	1.0167		1.15431	1.01102		1.15431	1.00692		1.152	1.00455		1.15431	1.00238		1.14286	1.00048
1.15631	1.02467		1.15631	1.02226		1.15631	1.01681		1.15631	1.01112		1.15631	1.00699		1.154	1.00461		1.15631	1.00229		1.14484	1.00058
1.15832	1.02462		1.15832	1.02253		1.15832	1.01696		1.15832	1.01129		1.15832	1.00705		1.156	1.00466		1.15832	1.00243		1.14683	1.00064
1.16032	1.02479		1.16032	1.02258		1.16032	1.01711		1.16032	1.01142		1.16032	1.00723		1.158	1.00474		1.16032	1.00244		1.14881	1.00064
1.16232	1.02491		1.16232	1.02257		1.16232	1.01715		1.16232	1.01144		1.16232	1.00728		1.16	1.00492		1.16232	1.00259		1.15079	1.00065
1.16433	1.025		1.16433	1.02274		1.16433	1.01724		1.16433	1.01139		1.16433	1.00742		1.162	1.00495		1.16433	1.00265		1.15278	1.00062
1.16633	1.02496		1.16633	1.02274		1.16633	1.01732		1.16633	1.0117		1.16633	1.00752		1.164	1.00495		1.16633	1.00269		1.15476	1.00064
1.16834	1.02509		1.16834	1.02283		1.16834	1.01733		1.16834	1.01171		1.16834	1.00747		1.166	1.0051		1.16834	1.00261		1.15675	1.0006
1.17034	1.02516		1.17034	1.02294		1.17034	1.01749		1.17034	1.01191		1.17034	1.00752		1.168	1.00509		1.17034	1.00265		1.15873	1.00063
1.17234	1.0252		1.17234	1.02304		1.17234	1.01772		1.17234	1.01202		1.17234	1.00766		1.17	1.00519		1.17234	1.00275		1.16071	1.00066
1.17435	1.02539		1.17435	1.02305		1.17435	1.01776		1.17435	1.01207		1.17435	1.00777		1.172	1.0053		1.17435	1.00279		1.1627	1.00067
1.17635	1.02546		1.17635	1.02299		1.17635	1.01789		1.17635	1.01219		1.17635	1.00788		1.174	1.00539		1.17635	1.0028		1.16468	1.00057
1.17836	1.02552		1.17836	1.02317		1.17836	1.01805		1.17836	1.01235		1.17836	1.00796		1.176	1.00547		1.17836	1.00292		1.16667	1.00073
1.18036	1.0255		1.18036	1.02317		1.18036	1.01817		1.18036	1.01252		1.18036	1.008		1.178	1.00547		1.18036	1.00302		1.16865	1.00075
1.18236	1.02568		1.18236	1.02328		1.18236	1.01817		1.18236	1.01265		1.18236	1.00815		1.18	1.00556		1.18236	1.00293		1.17063	1.00072
1.18437	1.02569		1.18437	1.02352		1.18437	1.01832		1.18437	1.01269		1.18437	1.00819		1.182	1.00566		1.18437	1.00298		1.17262	1.00081
1.18637	1.02571		1.18637	1.02354		1.18637	1.01834		1.18637	1.01268		1.18637	1.00823		1.184	1.00579		1.18637	1.00296		1.1746	1.00085
1.18838	1.02588		1.18838	1.02361		1.18838	1.01835		1.18838	1.01278		1.18838	1.00836		1.186	1.0058		1.18838	1.00311		1.17659	1.00077
1.19038	1.02592		1.19038	1.02353		1.19038	1.01854		1.19038	1.01284		1.19038	1.00839		1.188	1.00594		1.19038	1.00318		1.17857	1.0008
1.19238	1.02599		1.19238	1.02361		1.19238	1.0187		1.19238	1.01298		1.19238	1.00843		1.19	1.00595		1.19238	1.00306		1.18056	1.00083
1.19439	1.02605		1.19439	1.02373		1.19439	1.01863		1.19439	1.01302		1.19439	1.00859		1.192	1.00604		1.19439	1.0031		1.18254	1.00085
1.19639	1.02622		1.19639	1.02383		1.19639	1.01858		1.19639	1.01319		1.19639	1.00864		1.194	1.00611		1.19639	1.00314		1.18452	1.00081
1.1984	1.02624		1.1984	1.02382		1.1984	1.01873		1.1984	1.01327		1.1984	1.00878		1.196	1.00618		1.1984	1.00317		1.18651	1.00084
1.2004	1.0262		1.2004	1.02389		1.2004	1.01877		1.2004	1.01336		1.2004	1.00894		1.198	1.00618		1.2004	1.00329		1.18849	1.00081
1.2024	1.0264		1.2024	1.02391		1.2024	1.01886		1.2024	1.01341		1.2024	1.0089		1.2	1.00621		1.2024	1.00328		1.19048	1.00084
1.20441	1.02637		1.20441	1.02395		1.20441	1.01889		1.20441	1.01337		1.20441	1.00888		1.202	1.00625		1.20441	1.00337		1.19246	1.00085
1.20641	1.02636		1.20641	1.02407		1.20641	1.01904		1.20641	1.01347		1.20641	1.00899		1.204	1.00633		1.20641	1.00333		1.19444	1.00091
1.20842	1.02651		1.20842	1.02411		1.20842	1.01918		1.20842	1.0135		1.20842	1.00902		1.206	1.00641		1.20842	1.00342		1.19643	1.00094
1.21042	1.02653		1.21042	1.02416		1.21042	1.01922		1.21042	1.01347		1.21042	1.00917		1.208	1.00649		1.21042	1.00346		1.19841	1.0009
1.21242	1.02653		1.21242	1.02419		1.21242	1.01924		1.21242	1.01362		1.21242	1.00933		1.21	1.00649		1.21242	1.00346		1.2004	1.00096
1.21443	1.02653		1.21443	1.02433		1.21443	1.01931		1.21443	1.01368		1.21443	1.00923		1.212	1.00654		1.21443	1.00361		1.20238	1.00091
1.21643	1.02656		1.21643	1.02433		1.21643	1.0194		1.21643	1.01373		1.21643	1.00936		1.214	1.00665		1.21643	1.00357		1.20437	1.00093
1.21844	1.02654		1.21844	1.02443		1.21844	1.01941		1.21844	1.01385		1.21844	1.00935		1.216	1.00672		1.21844	1.00356		1.20635	1.00108
1.22044	1.02657		1.22044	1.02461		1.22044	1.01949		1.22044	1.01396		1.22044	1.00947		1.218	1.00676		1.22044	1.00356		1.20833	1.00112
1.22244	1.02671		1.22244	1.02468		1.22244	1.01963		1.22244	1.01411		1.22244	1.00962		1.22	1.00678		1.22244	1.0037		1.21032	1.00113
1.22445	1.0268		1.22445	1.02475		1.22445	1.01965		1.22445	1.01406		1.22445	1.00951		1.222	1.00692		1.22445	1.00374		1.2123	1.00104
1.22645	1.02682		1.22645	1.02482		1.22645	1.01987		1.22645	1.01418		1.22645	1.00969		1.224	1.00696		1.22645	1.00383		1.21429	1.00113
1.22846	1.02684		1.22846	1.02497		1.22846	1.01985		1.22846	1.01423		1.22846	1.00977		1.226	1.00699		1.22846	1.00392		1.21627	1.00114
1.23046	1.02683		1.23046	1.02495		1.23046	1.01997		1.23046	1.01432		1.23046	1.00987		1.228	1.00713		1.23046	1.00389		1.21825	1.00114
1.23246	1.02701		1.23246	1.02497		1.23246	1.01995		1.23246	1.01446		1.23246	1.00992		1.23	1.00715		1.23246	1.00399		1.22024	1.00117
1.23447	1.02695		1.23447	1.02501		1.23447	1.02006		1.23447	1.01454		1.23447	1.00996		1.232	1.00723		1.23447	1.00382		1.22222	1.00118
1.23647	1.027		1.23647	1.0251		1.23647	1.02008		1.23647	1.01452		1.23647	1.01007		1.234	1.00724		1.23647	1.0039		1.22421	1.00116
1.23848	1.027		1.23848	1.02495		1.23848	1.02014		1.23848	1.01468		1.23848	1.01006		1.236	1.00733		1.23848	1.00403		1.22619	1.00119
1.24048	1.02708		1.24048	1.02508		1.24048	1.02023		1.24048	1.01478		1.24048	1.01013		1.238	1.00725		1.24048	1.004		1.22817	1.00109
1.24248	1.02715		1.24248	1.02519		1.24248	1.02033		1.24248	1.01479		1.24248	1.01019		1.24	1.00738		1.24248	1.00412		1.23016	1.00119
1.24449	1.02715		1.24449	1.02526		1.24449	1.02042		1.24449	1.01492		1.24449	1.01024		1.242	1.00736		1.24449	1.00418		1.23214	1.00121
1.24649	1.02724		1.24649	1.02531		1.24649	1.02058		1.24649	1.01502		1.24649	1.01025		1.244	1.00741		1.24649	1.00415		1.23413	1.00116
1.2485	1.02715		1.2485	1.0254		1.2485	1.02058		1.2485	1.01511		1.2485	1.01025		1.246	1.00747		1.2485	1.00422		1.23611	1.00125
1.2505	1.02726		1.2505	1.02539		1.2505	1.02065		1.2505	1.01509		1.2505	1.01033		1.248	1.00753		1.2505	1.0042		1.2381	1.0013
1.25251	1.02718		1.25251	1.02546		1.25251	1.02063		1.25251	1.01514		1.25251	1.01056		1.25	1.0076		1.25251	1.0042		1.24008	1.00122
1.25451	1.02728		1.25451	1.02549		1.25451	1.02073		1.25451	1.01517		1.25451	1.01055		1.252	1.00763		1.25451	1.00423		1.24206	1.00127
1.25651	1.0273		1.25651	1.02553		1.25651	1.02081		1.25651	1.01537		1.25651	1.01063		1.254	1.00766		1.25651	1.00432		1.24405	1.00124
1.25852	1.02735		1.25852	1.02561		1.25852	1.02084		1.25852	1.01539		1.25852	1.01068		1.256	1.00759		1.25852	1.00442		1.24603	1.0013
1.26052	1.02738		1.26052	1.02574		1.26052	1.02082		1.26052	1.0154		1.26052	1.01074		1.258	1.00775		1.26052	1.00448		1.24802	1.00129
1.26253	1.02752		1.26253	1.0257		1.26253	1.0209		1.26253	1.01544		1.26253	1.01075		1.26	1.0078		1.26253	1.00447		1.25	1.00124
1.26453	1.02743		1.26453	1.02575		1.26453	1.02084		1.26453	1.01551		1.26453	1.01076		1.262	1.00795		1.26453	1.00458		1.25198	1.00128
1.26653	1.0274		1.26653	1.02573		1.26653	1.02084		1.26653	1.01564		1.26653	1.01095		1.264	1.00799		1.26653	1.00459		1.25397	1.00129
1.26854	1.02758		1.26854	1.02572		1.26854	1.021		1.26854	1.01569		1.26854	1.011		1.266	1.008		1.26854	1.00468		1.25595	1.00137
1.27054	1.02759		1.27054	1.02577		1.27054	1.02103		1.27054	1.0158		1.27054	1.011		1.268	1.00802		1.27054	1.00475		1.25794	1.00135
1.27255	1.02765		1.27255	1.02584		1.27255	1.02118		1.27255	1.01583		1.27255	1.01106		1.27	1.00803		1.27255	1.00482		1.25992	1.00148
1.27455	1.02753		1.27455	1.02585		1.27455	1.02116		1.27455	1.0157		1.27455	1.01108		1.272	1.00806		1.27455	1.00484		1.2619	1.00141
1.27655	1.02765		1.27655	1.02583		1.27655	1.02115		1.27655	1.0159		1.27655	1.0111		1.274	1.00818		1.27655	1.00477		1.26389	1.00144
1.27856	1.0275		1.27856	1.02597		1.27856	1.02127		1.27856	1.01586		1.27856	1.01113		1.276	1.00817		1.27856	1.00482		1.26587	1.0015
1.28056	1.02754		1.28056	1.02594		1.28056	1.02116		1.28056	1.01591		1.28056	1.0112		1.278	1.00826		1.28056	1.00483		1.26786	1.00145
1.28257	1.02755		1.28257	1.02603		1.28257	1.0212		1.28257	1.01607		1.28257	1.01128		1.28	1.0084		1.28257	1.00492		1.26984	1.00155
1.28457	1.02763		1.28457	1.02604		1.28457	1.02129		1.28457	1.01604		1.28457	1.01135		1.282	1.00847		1.28457	1.00492		1.27183	1.0016
1.28657	1.02761		1.28657	1.026		1.28657	1.02137		1.28657	1.01618		1.28657	1.01146		1.284	1.00848		1.28657	1.00501		1.27381	1.00158
1.28858	1.0276		1.28858	1.02614		1.28858	1.02142		1.28858	1.01625		1.28858	1.01142		1.286	1.0085		1.28858	1.00504		1.27579	1.00162
1.29058	1.02771		1.29058	1.0261		1.29058	1.02152		1.29058	1.01623		1.29058	1.01137		1.288	1.00855		1.29058	1.00506		1.27778	1.00163
1.29259	1.02782		1.29259	1.0261		1.29259	1.0216		1.29259	1.01626		1.29259	1.0114		1.29	1.0085		1.29259	1.00499		1.27976	1.00162
1.29459	1.02783		1.29459	1.0261		1.29459	1.02159		1.29459	1.01623		1.29459	1.01142		1.292	1.00853		1.29459	1.00505		1.28175	1.00156
1.29659	1.02779		1.29659	1.02622		1.29659	1.02162		1.29659	1.01632		1.29659	1.01146		1.294	1.00858		1.29659	1.00504		1.28373	1.00158
1.2986	1.02772		1.2986	1.02622		1.2986	1.02169		1.2986	1.01659		1.2986	1.01158		1.296	1.00865		1.2986	1.0052		1.28571	1.00159
1.3006	1.02772		1.3006	1.02636		1.3006	1.02178		1.3006	1.01661		1.3006	1.01148		1.298	1.00872		1.3006	1.00514		1.2877	1.00165
1.30261	1.02775		1.30261	1.02643		1.30261	1.02192		1.30261	1.01663		1.30261	1.01143		1.3	1.00881		1.30261	1.00518		1.28968	1.00159
1.30461	1.02789		1.30461	1.02646		1.30461	1.02178		1.30461	1.01667		1.30461	1.01154		1.302	1.00889		1.30461	1.00519		1.29167	1.00162
1.30661	1.02796		1.30661	1.02645		1.30661	1.02176		1.30661	1.01656		1.30661	1.01168		1.304	1.00891		1.30661	1.00524		1.29365	1.00161
1.30862	1.02792		1.30862	1.02643		1.30862	1.02193		1.30862	1.01657		1.30862	1.01173		1.306	1.00895		1.30862	1.00531		1.29563	1.00172
1.31062	1.02779		1.31062	1.02644		1.31062	1.02197		1.31062	1.01656		1.31062	1.01178		1.308	1.00888		1.31062	1.00526		1.29762	1.00173
1.31263	1.02778		1.31263	1.02646		1.31263	1.022		1.31263	1.01665		1.31263	1.01174		1.31	1.00889		1.31263	1.00529		1.2996	1.00179
1.31463	1.02789		1.31463	1.0266		1.31463	1.02207		1.31463	1.01671		1.31463	1.01179		1.312	1.00897		1.31463	1.00532		1.30159	1.00173
1.31663	1.02795		1.31663	1.02651		1.31663	1.02213		1.31663	1.01666		1.31663	1.01181		1.314	1.00897		1.31663	1.00529		1.30357	1.00178
1.31864	1.02793		1.31864	1.02644		1.31864	1.02218		1.31864	1.01672		1.31864	1.01184		1.316	1.00897		1.31864	1.00556		1.30556	1.00177
1.32064	1.0279		1.32064	1.02659		1.32064	1.02219		1.32064	1.01661		1.32064	1.01208		1.318	1.00901		1.32064	1.00548		1.30754	1.00178
1.32265	1.02811		1.32265	1.02658		1.32265	1.02221		1.32265	1.01679		1.32265	1.01205		1.32	1.00904		1.32265	1.00548		1.30952	1.00177
1.32465	1.02812		1.32465	1.0266		1.32465	1.02226		1.32465	1.01687		1.32465	1.01209		1.322	1.00913		1.32465	1.00552		1.31151	1.0017
1.32665	1.02809		1.32665	1.02673		1.32665	1.02231		1.32665	1.01691		1.32665	1.01212		1.324	1.00928		1.32665	1.00553		1.31349	1.00184
1.32866	1.02803		1.32866	1.02667		1.32866	1.02247		1.32866	1.01684		1.32866	1.01216		1.326	1.00935		1.32866	1.00558		1.31548	1.0018
1.33066	1.02811		1.33066	1.02678		1.33066	1.02251		1.33066	1.01704		1.33066	1.01221		1.328	1.00925		1.33066	1.00563		1.31746	1.00186
1.33267	1.02801		1.33267	1.0267		1.33267	1.02238		1.33267	1.01703		1.33267	1.01225		1.33	1.00926		1.33267	1.00562		1.31944	1.00175
1.33467	1.0281		1.33467	1.02667		1.33467	1.0224		1.33467	1.01719		1.33467	1.01237		1.332	1.00932		1.33467	1.00565		1.32143	1.00177
1.33667	1.0281		1.33667	1.02666		1.33667	1.02249		1.33667	1.01719		1.33667	1.01244		1.334	1.00932		1.33667	1.00563		1.32341	1.00189
1.33868	1.02808		1.33868	1.02675		1.33868	1.02246		1.33868	1.01711		1.33868	1.01242		1.336	1.00951		1.33868	1.00559		1.3254	1.00188
1.34068	1.0281		1.34068	1.02668		1.34068	1.02245		1.34068	1.0172		1.34068	1.01252		1.338	1.00953		1.34068	1.00565		1.32738	1.00182
1.34269	1.02824		1.34269	1.02665		1.34269	1.02252		1.34269	1.01712		1.34269	1.01254		1.34	1.00951		1.34269	1.00572		1.32937	1.00192
1.34469	1.02823		1.34469	1.02669		1.34469	1.02253		1.34469	1.01727		1.34469	1.0125		1.342	1.00965		1.34469	1.00572		1.33135	1.00195
1.34669	1.02823		1.34669	1.0267		1.34669	1.02242		1.34669	1.01724		1.34669	1.01258		1.344	1.00957		1.34669	1.00579		1.33333	1.00189
1.3487	1.02829		1.3487	1.02677		1.3487	1.02264		1.3487	1.01725		1.3487	1.01261		1.346	1.00968		1.3487	1.00574		1.33532	1.00192
1.3507	1.02828		1.3507	1.02682		1.3507	1.0227		1.3507	1.01727		1.3507	1.01263		1.348	1.00974		1.3507	1.00581		1.3373	1.00199
1.35271	1.02841		1.35271	1.02682		1.35271	1.02266		1.35271	1.01734		1.35271	1.01258		1.35	1.00985		1.35271	1.00582		1.33929	1.002
1.35471	1.02834		1.35471	1.02692		1.35471	1.02264		1.35471	1.01736		1.35471	1.01267		1.352	1.00982		1.35471	1.00582		1.34127	1.002
1.35671	1.02836		1.35671	1.0268		1.35671	1.0227		1.35671	1.01739		1.35671	1.01263		1.354	1.00972		1.35671	1.00576		1.34325	1.00211
1.35872	1.02842		1.35872	1.02689		1.35872	1.02269		1.35872	1.01743		1.35872	1.01272		1.356	1.00988		1.35872	1.00588		1.34524	1.0021
1.36072	1.02832		1.36072	1.02699		1.36072	1.02269		1.36072	1.01734		1.36072	1.01263		1.358	1.0099		1.36072	1.00596		1.34722	1.00207
1.36273	1.02829		1.36273	1.02692		1.36273	1.02286		1.36273	1.01739		1.36273	1.01274		1.36	1.00998		1.36273	1.00596		1.34921	1.00199
1.36473	1.02839		1.36473	1.02688		1.36473	1.02285		1.36473	1.01743		1.36473	1.01284		1.362	1.00996		1.36473	1.00598		1.35119	1.00212
1.36673	1.02831		1.36673	1.02703		1.36673	1.02286		1.36673	1.01762		1.36673	1.01275		1.364	1.00998		1.36673	1.00603		1.35317	1.00202
1.36874	1.02826		1.36874	1.0269		1.36874	1.02288		1.36874	1.01763		1.36874	1.0128		1.366	1.01003		1.36874	1.00603		1.35516	1.00211
1.37074	1.02824		1.37074	1.02694		1.37074	1.02291		1.37074	1.01767		1.37074	1.01278		1.368	1.01008		1.37074	1.00611		1.35714	1.00209
1.37275	1.02817		1.37275	1.02687		1.37275	1.02292		1.37275	1.0176		1.37275	1.0128		1.37	1.01005		1.37275	1.00619		1.35913	1.00208
1.37475	1.0283		1.37475	1.02687		1.37475	1.0229		1.37475	1.01754		1.37475	1.01284		1.372	1.01001		1.37475	1.00611		1.36111	1.00205
1.37675	1.02827		1.37675	1.02687		1.37675	1.0229		1.37675	1.01752		1.37675	1.0129		1.374	1.01008		1.37675	1.00612		1.3631	1.00205
1.37876	1.02833		1.37876	1.02696		1.37876	1.02296		1.37876	1.01758		1.37876	1.01293		1.376	1.01009		1.37876	1.0061		1.36508	1.00208
1.38076	1.02829		1.38076	1.02694		1.38076	1.02294		1.38076	1.01771		1.38076	1.01287		1.378	1.01017		1.38076	1.00612		1.36706	1.00215
1.38277	1.02828		1.38277	1.02698		1.38277	1.02297		1.38277	1.01778		1.38277	1.01301		1.38	1.01014		1.38277	1.00617		1.36905	1.00215
1.38477	1.02841		1.38477	1.02704		1.38477	1.02294		1.38477	1.01774		1.38477	1.01303		1.382	1.01009		1.38477	1.00615		1.37103	1.00218
1.38677	1.02851		1.38677	1.02702		1.38677	1.02298		1.38677	1.01773		1.38677	1.01298		1.384	1.0101		1.38677	1.00619		1.37302	1.00219
1.38878	1.02836		1.38878	1.027		1.38878	1.02291		1.38878	1.01786		1.38878	1.01307		1.386	1.01013		1.38878	1.00623		1.375	1.00221
1.39078	1.02846		1.39078	1.02699		1.39078	1.02288		1.39078	1.01797		1.39078	1.01319		1.388	1.01018		1.39078	1.00621		1.37698	1.00212
1.39279	1.02845		1.39279	1.02712		1.39279	1.02298		1.39279	1.01781		1.39279	1.01323		1.39	1.01021		1.39279	1.00621		1.37897	1.00229
1.39479	1.0285		1.39479	1.02707		1.39479	1.02298		1.39479	1.01774		1.39479	1.01318		1.392	1.01036		1.39479	1.00625		1.38095	1.00225
1.39679	1.02844		1.39679	1.02713		1.39679	1.02302		1.39679	1.01776		1.39679	1.01327		1.394	1.01025		1.39679	1.00617		1.38294	1.00228
1.3988	1.02845		1.3988	1.02708		1.3988	1.02298		1.3988	1.01785		1.3988	1.0132		1.396	1.01036		1.3988	1.00637		1.38492	1.00227
1.4008	1.02847		1.4008	1.02707		1.4008	1.02308		1.4008	1.01779		1.4008	1.01323		1.398	1.01038		1.4008	1.00636		1.3869	1.00232
1.40281	1.02841		1.40281	1.02705		1.40281	1.02308		1.40281	1.01783		1.40281	1.01326		1.4	1.01042		1.40281	1.00637		1.38889	1.00228
1.40481	1.02849		1.40481	1.02711		1.40481	1.02305		1.40481	1.01786		1.40481	1.01329		1.402	1.01044		1.40481	1.00641		1.39087	1.0023
1.40681	1.02848		1.40681	1.02707		1.40681	1.02313		1.40681	1.01787		1.40681	1.0133		1.404	1.01041		1.40681	1.00631		1.39286	1.00232
1.40882	1.02848		1.40882	1.02708		1.40882	1.02315		1.40882	1.01793		1.40882	1.01331		1.406	1.01047		1.40882	1.00637		1.39484	1.0023
1.41082	1.02855		1.41082	1.02721		1.41082	1.02313		1.41082	1.01793		1.41082	1.01332		1.408	1.01043		1.41082	1.00637		1.39683	1.0023
1.41283	1.0285		1.41283	1.0271		1.41283	1.02317		1.41283	1.01792		1.41283	1.0133		1.41	1.0104		1.41283	1.0065		1.39881	1.0023
1.41483	1.02844		1.41483	1.02705		1.41483	1.02329		1.41483	1.01796		1.41483	1.01336		1.412	1.01041		1.41483	1.00653		1.40079	1.00231
1.41683	1.02843		1.41683	1.02718		1.41683	1.02324		1.41683	1.01797		1.41683	1.01341		1.414	1.01051		1.41683	1.00649		1.40278	1.00235
1.41884	1.02833		1.41884	1.02709		1.41884	1.02312		1.41884	1.0179		1.41884	1.01346		1.416	1.01045		1.41884	1.00645		1.40476	1.00236
1.42084	1.0284		1.42084	1.02705		1.42084	1.02329		1.42084	1.01801		1.42084	1.01345		1.418	1.0105		1.42084	1.00656		1.40675	1.00225
1.42285	1.02847		1.42285	1.02718		1.42285	1.02318		1.42285	1.01803		1.42285	1.01336		1.42	1.01056		1.42285	1.00656		1.40873	1.00236
1.42485	1.02848		1.42485	1.02715		1.42485	1.0232		1.42485	1.01802		1.42485	1.01337		1.422	1.01049		1.42485	1.00659		1.41071	1.00231
1.42685	1.02845		1.42685	1.02718		1.42685	1.02329		1.42685	1.01812		1.42685	1.01334		1.424	1.01053		1.42685	1.00652		1.4127	1.00237
1.42886	1.02844		1.42886	1.02719		1.42886	1.02327		1.42886	1.01814		1.42886	1.01339		1.426	1.01053		1.42886	1.00652		1.41468	1.00237
1.43086	1.0285		1.43086	1.02725		1.43086	1.02332		1.43086	1.01817		1.43086	1.01344		1.428	1.01059		1.43086	1.00654		1.41667	1.00236
1.43287	1.02847		1.43287	1.02725		1.43287	1.02335		1.43287	1.01812		1.43287	1.01345		1.43	1.01052		1.43287	1.0065		1.41865	1.00225
1.43487	1.02857		1.43487	1.02732		1.43487	1.02332		1.43487	1.0182		1.43487	1.01346		1.432	1.01055		1.43487	1.00645		1.42063	1.00234
1.43687	1.02857		1.43687	1.02733		1.43687	1.02335		1.43687	1.01826		1.43687	1.01343		1.434	1.01058		1.43687	1.00656		1.42262	1.00225
1.43888	1.02851		1.43888	1.02722		1.43888	1.0234		1.43888	1.01821		1.43888	1.0135		1.436	1.01065		1.43888	1.00657		1.4246	1.00222
1.44088	1.02843		1.44088	1.02734		1.44088	1.02349		1.44088	1.01821		1.44088	1.01356		1.438	1.01058		1.44088	1.00656		1.42659	1.00231
1.44289	1.0285		1.44289	1.0274		1.44289	1.02344		1.44289	1.01818		1.44289	1.01348		1.44	1.01069		1.44289	1.00668		1.42857	1.00236
1.44489	1.02851		1.44489	1.02737		1.44489	1.02334		1.44489	1.0182		1.44489	1.01353		1.442	1.01072		1.44489	1.00666		1.43056	1.00227
1.44689	1.02842		1.44689	1.02722		1.44689	1.02332		1.44689	1.01822		1.44689	1.01351		1.444	1.01067		1.44689	1.00676		1.43254	1.00233
1.4489	1.0285		1.4489	1.02725		1.4489	1.02344		1.4489	1.01813		1.4489	1.01349		1.446	1.01068		1.4489	1.00661		1.43452	1.00234
1.4509	1.0285		1.4509	1.02721		1.4509	1.02335		1.4509	1.01808		1.4509	1.01359		1.448	1.0107		1.4509	1.00671		1.43651	1.00231
1.45291	1.02847		1.45291	1.02726		1.45291	1.02334		1.45291	1.01819		1.45291	1.01355		1.45	1.01072		1.45291	1.00669		1.43849	1.0024
1.45491	1.02857		1.45491	1.02724		1.45491	1.02332		1.45491	1.01818		1.45491	1.0137		1.452	1.01072		1.45491	1.00668		1.44048	1.00238
1.45691	1.02857		1.45691	1.02718		1.45691	1.0233		1.45691	1.0181		1.45691	1.01371		1.454	1.01075		1.45691	1.00669		1.44246	1.00234
1.45892	1.02852		1.45892	1.02722		1.45892	1.02335		1.45892	1.01814		1.45892	1.01377		1.456	1.01073		1.45892	1.00658		1.44444	1.00232
1.46092	1.02851		1.46092	1.02734		1.46092	1.02333		1.46092	1.01822		1.46092	1.01376		1.458	1.01069		1.46092	1.00669		1.44643	1.00241
1.46293	1.02853		1.46293	1.02731		1.46293	1.02353		1.46293	1.0182		1.46293	1.01383		1.46	1.01075		1.46293	1.00669		1.44841	1.00242
1.46493	1.0285		1.46493	1.02728		1.46493	1.02346		1.46493	1.01811		1.46493	1.01371		1.462	1.01083		1.46493	1.00667		1.4504	1.00242
1.46693	1.02842		1.46693	1.02729		1.46693	1.02333		1.46693	1.01822		1.46693	1.01375		1.464	1.01086		1.46693	1.0066		1.45238	1.00236
1.46894	1.02839		1.46894	1.02721		1.46894	1.0234		1.46894	1.01818		1.46894	1.01375		1.466	1.01085		1.46894	1.00656		1.45437	1.00239
1.47094	1.0283		1.47094	1.0272		1.47094	1.02345		1.47094	1.01828		1.47094	1.01369		1.468	1.01085		1.47094	1.00666		1.45635	1.00241
1.47295	1.02842		1.47295	1.0272		1.47295	1.02338		1.47295	1.01833		1.47295	1.01364		1.47	1.0108		1.47295	1.00665		1.45833	1.00245
1.47495	1.02839		1.47495	1.02721		1.47495	1.02336		1.47495	1.01843		1.47495	1.01365		1.472	1.0108		1.47495	1.00663		1.46032	1.00238
1.47695	1.02841		1.47695	1.02709		1.47695	1.02349		1.47695	1.01836		1.47695	1.01363		1.474	1.0108		1.47695	1.00658		1.4623	1.00245
1.47896	1.02843		1.47896	1.02722		1.47896	1.02337		1.47896	1.01834		1.47896	1.01368		1.476	1.01073		1.47896	1.00657		1.46429	1.00242
1.48096	1.02836		1.48096	1.02714		1.48096	1.02332		1.48096	1.01841		1.48096	1.0137		1.478	1.0107		1.48096	1.00663		1.46627	1.0024
1.48297	1.02836		1.48297	1.02718		1.48297	1.02337		1.48297	1.01836		1.48297	1.0136		1.48	1.01076		1.48297	1.00659		1.46825	1.00246
1.48497	1.02849		1.48497	1.02725		1.48497	1.02336		1.48497	1.01829		1.48497	1.01351		1.482	1.01087		1.48497	1.00659		1.47024	1.00243
1.48697	1.02837		1.48697	1.02718		1.48697	1.02327		1.48697	1.0183		1.48697	1.01358		1.484	1.01078		1.48697	1.00657		1.47222	1.00247
1.48898	1.02841		1.48898	1.0273		1.48898	1.02333		1.48898	1.01824		1.48898	1.01372		1.486	1.01074		1.48898	1.00666		1.47421	1.00247
1.49098	1.02844		1.49098	1.02729		1.49098	1.02327		1.49098	1.01817		1.49098	1.01368		1.488	1.01086		1.49098	1.00662		1.47619	1.00247
1.49299	1.02837		1.49299	1.02718		1.49299	1.02328		1.49299	1.0182		1.49299	1.01366		1.49	1.01081		1.49299	1.00665		1.47817	1.00247
1.49499	1.02839		1.49499	1.02703		1.49499	1.02337		1.49499	1.01822		1.49499	1.01371		1.492	1.01091		1.49499	1.00662		1.48016	1.0024
1.49699	1.02836		1.49699	1.02701		1.49699	1.02343		1.49699	1.01817		1.49699	1.01365		1.494	1.0109		1.49699	1.00661		1.48214	1.00239
1.499	1.02837		1.499	1.02702		1.499	1.02339		1.499	1.01814		1.499	1.01365		1.496	1.0109		1.499	1.00671		1.48413	1.00253
1.501	1.02838		1.501	1.0271		1.501	1.02339		1.501	1.01824		1.501	1.0136		1.498	1.01077		1.501	1.00671		1.48611	1.00251
1.50301	1.0284		1.50301	1.02711		1.50301	1.02334		1.50301	1.01809		1.50301	1.01359		1.5	1.0109		1.50301	1.00682		1.4881	1.00249
1.50501	1.02838		1.50501	1.02725		1.50501	1.02321		1.50501	1.01824		1.50501	1.0136		1.502	1.01094		1.50501	1.00683		1.49008	1.00247
1.50701	1.02831		1.50701	1.02732		1.50701	1.02338		1.50701	1.01823		1.50701	1.0136		1.504	1.01083		1.50701	1.00673		1.49206	1.00255
1.50902	1.02831		1.50902	1.02722		1.50902	1.02337		1.50902	1.01823		1.50902	1.01354		1.506	1.01086		1.50902	1.00669		1.49405	1.00247
1.51102	1.02834		1.51102	1.02726		1.51102	1.02343		1.51102	1.01823		1.51102	1.01359		1.508	1.01087		1.51102	1.00678		1.49603	1.00247
1.51303	1.02834		1.51303	1.02728		1.51303	1.02344		1.51303	1.01822		1.51303	1.01368		1.51	1.01091		1.51303	1.00676		1.49802	1.00246
1.51503	1.02832		1.51503	1.02726		1.51503	1.02344		1.51503	1.01811		1.51503	1.01359		1.512	1.01089		1.51503	1.00672		1.5	1.00246
1.51703	1.02831		1.51703	1.02728		1.51703	1.02352		1.51703	1.01795		1.51703	1.01358		1.514	1.01084		1.51703	1.00679		1.50198	1.0024
1.51904	1.02834		1.51904	1.02727		1.51904	1.02345		1.51904	1.01809		1.51904	1.01358		1.516	1.0108		1.51904	1.00673		1.50397	1.00249
1.52104	1.02828		1.52104	1.02719		1.52104	1.02342		1.52104	1.01817		1.52104	1.01363		1.518	1.01089		1.52104	1.00661		1.50595	1.00246
1.52305	1.02832		1.52305	1.02736		1.52305	1.0233		1.52305	1.0182		1.52305	1.01365		1.52	1.01091		1.52305	1.00663		1.50794	1.0025
1.52505	1.02833		1.52505	1.02724		1.52505	1.02323		1.52505	1.01802		1.52505	1.01354		1.522	1.0109		1.52505	1.00661		1.50992	1.00246
1.52705	1.02832		1.52705	1.02731		1.52705	1.02328		1.52705	1.01815		1.52705	1.01361		1.524	1.01091		1.52705	1.00662		1.5119	1.00246
1.52906	1.02839		1.52906	1.02726		1.52906	1.02335		1.52906	1.01814		1.52906	1.01351		1.526	1.01102		1.52906	1.00656		1.51389	1.00248
1.53106	1.0284		1.53106	1.02716		1.53106	1.02337		1.53106	1.01812		1.53106	1.01354		1.528	1.01097		1.53106	1.00665		1.51587	1.00245
1.53307	1.02826		1.53307	1.02716		1.53307	1.02331		1.53307	1.01813		1.53307	1.01358		1.53	1.01087		1.53307	1.00662		1.51786	1.00241
1.53507	1.02827		1.53507	1.02725		1.53507	1.02342		1.53507	1.0181		1.53507	1.01362		1.532	1.01093		1.53507	1.00659		1.51984	1.00244
1.53707	1.02831		1.53707	1.0272		1.53707	1.02345		1.53707	1.01819		1.53707	1.01357		1.534	1.01078		1.53707	1.00662		1.52183	1.00252
1.53908	1.02829		1.53908	1.02712		1.53908	1.02345		1.53908	1.01819		1.53908	1.01354		1.536	1.01076		1.53908	1.00665		1.52381	1.00253
1.54108	1.02825		1.54108	1.02711		1.54108	1.02339		1.54108	1.01815		1.54108	1.01351		1.538	1.01078		1.54108	1.00668		1.52579	1.00249
1.54309	1.02819		1.54309	1.02712		1.54309	1.02336		1.54309	1.01818		1.54309	1.01356		1.54	1.0108		1.54309	1.00671		1.52778	1.00243
1.54509	1.02826		1.54509	1.02718		1.54509	1.02342		1.54509	1.01812		1.54509	1.01348		1.542	1.0107		1.54509	1.00666		1.52976	1.00248
1.54709	1.02833		1.54709	1.02706		1.54709	1.02337		1.54709	1.01803		1.54709	1.01356		1.544	1.01073		1.54709	1.00661		1.53175	1.00244
1.5491	1.0284		1.5491	1.02722		1.5491	1.02335		1.5491	1.01814		1.5491	1.01348		1.546	1.01068		1.5491	1.00649		1.53373	1.00232
1.5511	1.02812		1.5511	1.02715		1.5511	1.0234		1.5511	1.01816		1.5511	1.01355		1.548	1.0107		1.5511	1.00654		1.53571	1.00239
1.55311	1.02826		1.55311	1.02702		1.55311	1.02335		1.55311	1.01812		1.55311	1.01358		1.55	1.01073		1.55311	1.00662		1.5377	1.00237
1.55511	1.02831		1.55511	1.02708		1.55511	1.02323		1.55511	1.0181		1.55511	1.01363		1.552	1.01067		1.55511	1.00653		1.53968	1.00241
1.55711	1.02833		1.55711	1.02709		1.55711	1.0232		1.55711	1.01803		1.55711	1.01344		1.554	1.01073		1.55711	1.00655		1.54167	1.00237
1.55912	1.02833		1.55912	1.02715		1.55912	1.02328		1.55912	1.01819		1.55912	1.01344		1.556	1.01058		1.55912	1.00657		1.54365	1.00236
1.56112	1.02829		1.56112	1.02705		1.56112	1.02324		1.56112	1.01808		1.56112	1.01345		1.558	1.01059		1.56112	1.00658		1.54563	1.00238
1.56313	1.02838		1.56313	1.02708		1.56313	1.02322		1.56313	1.01801		1.56313	1.01337		1.56	1.01057		1.56313	1.00656		1.54762	1.00241
1.56513	1.0283		1.56513	1.02713		1.56513	1.02314		1.56513	1.018		1.56513	1.01335		1.562	1.01056		1.56513	1.0066		1.5496	1.0024
1.56713	1.02816		1.56713	1.02702		1.56713	1.02302		1.56713	1.01799		1.56713	1.0133		1.564	1.01052		1.56713	1.00654		1.55159	1.00239
1.56914	1.02812		1.56914	1.02703		1.56914	1.02317		1.56914	1.01803		1.56914	1.01335		1.566	1.01062		1.56914	1.00652		1.55357	1.00234
1.57114	1.02806		1.57114	1.02682		1.57114	1.02326		1.57114	1.01795		1.57114	1.01335		1.568	1.01055		1.57114	1.00648		1.55556	1.00236
1.57315	1.02817		1.57315	1.02686		1.57315	1.02321		1.57315	1.01776		1.57315	1.01333		1.57	1.01055		1.57315	1.0065		1.55754	1.00242
1.57515	1.02821		1.57515	1.02688		1.57515	1.02309		1.57515	1.01786		1.57515	1.01331		1.572	1.01061		1.57515	1.00651		1.55952	1.00245
1.57715	1.02816		1.57715	1.02683		1.57715	1.02308		1.57715	1.01781		1.57715	1.01329		1.574	1.01053		1.57715	1.00648		1.56151	1.00241
1.57916	1.02817		1.57916	1.02686		1.57916	1.02309		1.57916	1.0178		1.57916	1.01333		1.576	1.01046		1.57916	1.00645		1.56349	1.00236
1.58116	1.02815		1.58116	1.02686		1.58116	1.02307		1.58116	1.01776		1.58116	1.01323		1.578	1.01053		1.58116	1.00641		1.56548	1.00234
1.58317	1.02819		1.58317	1.02674		1.58317	1.02307		1.58317	1.01765		1.58317	1.01318		1.58	1.01054		1.58317	1.00649		1.56746	1.00237
1.58517	1.02803		1.58517	1.0268		1.58517	1.023		1.58517	1.01778		1.58517	1.01311		1.582	1.01054		1.58517	1.00646		1.56944	1.00232
1.58717	1.02799		1.58717	1.02668		1.58717	1.02297		1.58717	1.01777		1.58717	1.01305		1.584	1.01048		1.58717	1.00638		1.57143	1.00238
1.58918	1.028		1.58918	1.02681		1.58918	1.02296		1.58918	1.01776		1.58918	1.01317		1.586	1.01051		1.58918	1.0064		1.57341	1.00235
1.59118	1.02809		1.59118	1.02684		1.59118	1.02287		1.59118	1.01773		1.59118	1.01309		1.588	1.01049		1.59118	1.00636		1.5754	1.00234
1.59319	1.028		1.59319	1.02683		1.59319	1.023		1.59319	1.01773		1.59319	1.01306		1.59	1.01045		1.59319	1.00633		1.57738	1.00231
1.59519	1.02788		1.59519	1.02694		1.59519	1.02303		1.59519	1.01774		1.59519	1.01311		1.592	1.0105		1.59519	1.00628		1.57937	1.00224
1.59719	1.02793		1.59719	1.02678		1.59719	1.02299		1.59719	1.0177		1.59719	1.01306		1.594	1.01044		1.59719	1.0063		1.58135	1.00227
1.5992	1.02806		1.5992	1.02676		1.5992	1.02299		1.5992	1.01773		1.5992	1.01304		1.596	1.01052		1.5992	1.00629		1.58333	1.00224
1.6012	1.02807		1.6012	1.02664		1.6012	1.02297		1.6012	1.01763		1.6012	1.01295		1.598	1.01043		1.6012	1.00613		1.58532	1.00226
1.60321	1.02803		1.60321	1.02672		1.60321	1.02287		1.60321	1.01761		1.60321	1.01302		1.6	1.01048		1.60321	1.00626		1.5873	1.00231
1.60521	1.02797		1.60521	1.0267		1.60521	1.02284		1.60521	1.01753		1.60521	1.01301		1.602	1.01035		1.60521	1.0063		1.58929	1.00224
1.60721	1.02787		1.60721	1.02675		1.60721	1.02275		1.60721	1.01745		1.60721	1.01304		1.604	1.01029		1.60721	1.00627		1.59127	1.00223
1.60922	1.02789		1.60922	1.02663		1.60922	1.02282		1.60922	1.01744		1.60922	1.01299		1.606	1.01029		1.60922	1.00619		1.59325	1.00219
1.61122	1.02791		1.61122	1.02668		1.61122	1.02279		1.61122	1.01753		1.61122	1.01297		1.608	1.01031		1.61122	1.00612		1.59524	1.0023
1.61323	1.02779		1.61323	1.02669		1.61323	1.02273		1.61323	1.01743		1.61323	1.01295		1.61	1.01031		1.61323	1.0062		1.59722	1.00226
1.61523	1.02787		1.61523	1.02658		1.61523	1.02267		1.61523	1.01735		1.61523	1.0129		1.612	1.01029		1.61523	1.00605		1.59921	1.00224
1.61723	1.02783		1.61723	1.02659		1.61723	1.0227		1.61723	1.0174		1.61723	1.01289		1.614	1.0103		1.61723	1.00613		1.60119	1.00219
1.61924	1.02774		1.61924	1.02659		1.61924	1.02278		1.61924	1.01742		1.61924	1.01293		1.616	1.01035		1.61924	1.00604		1.60317	1.00217
1.62124	1.02773		1.62124	1.02669		1.62124	1.02282		1.62124	1.01736		1.62124	1.01285		1.618	1.01016		1.62124	1.00615		1.60516	1.0022
1.62325	1.0278		1.62325	1.02675		1.62325	1.02269		1.62325	1.01735		1.62325	1.0128		1.62	1.01013		1.62325	1.0061		1.60714	1.00218
1.62525	1.02768		1.62525	1.02651		1.62525	1.02261		1.62525	1.01736		1.62525	1.01275		1.622	1.01012		1.62525	1.006		1.60913	1.00221
1.62725	1.02772		1.62725	1.02658		1.62725	1.02257		1.62725	1.01745		1.62725	1.01271		1.624	1.01011		1.62725	1.006		1.61111	1.00219
1.62926	1.02776		1.62926	1.02648		1.62926	1.02252		1.62926	1.01732		1.62926	1.01263		1.626	1.01008		1.62926	1.00593		1.6131	1.00217
1.63126	1.02774		1.63126	1.02636		1.63126	1.02248		1.63126	1.01729		1.63126	1.01262		1.628	1.01001		1.63126	1.00595		1.61508	1.0022
1.63327	1.02768		1.63327	1.02641		1.63327	1.02244		1.63327	1.01724		1.63327	1.0126		1.63	1.01002		1.63327	1.00593		1.61706	1.00214
1.63527	1.02762		1.63527	1.02638		1.63527	1.0225		1.63527	1.01708		1.63527	1.01252		1.632	1.00996		1.63527	1.00589		1.61905	1.0022
1.63727	1.02765		1.63727	1.02635		1.63727	1.02246		1.63727	1.01706		1.63727	1.01258		1.634	1.00992		1.63727	1.00592		1.62103	1.00214
1.63928	1.0277		1.63928	1.02637		1.63928	1.02248		1.63928	1.01693		1.63928	1.01251		1.636	1.0099		1.63928	1.00584		1.62302	1.00224
1.64128	1.0275		1.64128	1.0263		1.64128	1.02236		1.64128	1.01695		1.64128	1.01254		1.638	1.0099		1.64128	1.00583		1.625	1.00221
1.64329	1.02747		1.64329	1.02621		1.64329	1.02238		1.64329	1.01689		1.64329	1.01254		1.64	1.00978		1.64329	1.00578		1.62698	1.00218
1.64529	1.02754		1.64529	1.02614		1.64529	1.02249		1.64529	1.0169		1.64529	1.01251		1.642	1.00988		1.64529	1.00574		1.62897	1.00216
1.64729	1.02759		1.64729	1.02612		1.64729	1.02237		1.64729	1.01694		1.64729	1.01249		1.644	1.00976		1.64729	1.00579		1.63095	1.00212
1.6493	1.02745		1.6493	1.02617		1.6493	1.02231		1.6493	1.0171		1.6493	1.01238		1.646	1.00979		1.6493	1.00579		1.63294	1.00211
1.6513	1.02762		1.6513	1.02621		1.6513	1.02231		1.6513	1.01687		1.6513	1.01242		1.648	1.00975		1.6513	1.00582		1.63492	1.00217
1.65331	1.02748		1.65331	1.02624		1.65331	1.02226		1.65331	1.01694		1.65331	1.01243		1.65	1.00978		1.65331	1.00574		1.6369	1.00204
1.65531	1.02739		1.65531	1.02619		1.65531	1.02222		1.65531	1.017		1.65531	1.01239		1.652	1.00963		1.65531	1.00571		1.63889	1.00207
1.65731	1.02742		1.65731	1.02614		1.65731	1.02219		1.65731	1.01678		1.65731	1.01228		1.654	1.0097		1.65731	1.00563		1.64087	1.00206
1.65932	1.02744		1.65932	1.02606		1.65932	1.02215		1.65932	1.01682		1.65932	1.01229		1.656	1.0097		1.65932	1.00558		1.64286	1.002
1.66132	1.0274		1.66132	1.02616		1.66132	1.02208		1.66132	1.01677		1.66132	1.01225		1.658	1.00965		1.66132	1.00566		1.64484	1.00201
1.66333	1.0274		1.66333	1.02613		1.66333	1.02215		1.66333	1.01674		1.66333	1.01219		1.66	1.0096		1.66333	1.00564		1.64683	1.00197
1.66533	1.02732		1.66533	1.02606		1.66533	1.022		1.66533	1.01646		1.66533	1.01219		1.662	1.0096		1.66533	1.00558		1.64881	1.00194
1.66733	1.0273		1.66733	1.02588		1.66733	1.02198		1.66733	1.01664		1.66733	1.01218		1.664	1.00955		1.66733	1.00553		1.65079	1.00197
1.66934	1.02731		1.66934	1.02597		1.66934	1.02196		1.66934	1.01639		1.66934	1.01201		1.666	1.00955		1.66934	1.00549		1.65278	1.00194
1.67134	1.02738		1.67134	1.02598		1.67134	1.02196		1.67134	1.01634		1.67134	1.01199		1.668	1.00941		1.67134	1.00542		1.65476	1.00191
1.67335	1.02733		1.67335	1.02589		1.67335	1.02184		1.67335	1.01637		1.67335	1.01193		1.67	1.00941		1.67335	1.00545		1.65675	1.00195
1.67535	1.02727		1.67535	1.02588		1.67535	1.02186		1.67535	1.01628		1.67535	1.01191		1.672	1.00948		1.67535	1.00538		1.65873	1.002
1.67735	1.02725		1.67735	1.02588		1.67735	1.02181		1.67735	1.01627		1.67735	1.0119		1.674	1.00939		1.67735	1.00547		1.66071	1.00203
1.67936	1.0272		1.67936	1.02585		1.67936	1.02174		1.67936	1.01623		1.67936	1.01186		1.676	1.00924		1.67936	1.00545		1.6627	1.00195
1.68136	1.0272		1.68136	1.02577		1.68136	1.02169		1.68136	1.01622		1.68136	1.01197		1.678	1.00927		1.68136	1.00539		1.66468	1.00194
1.68337	1.02719		1.68337	1.02571		1.68337	1.02153		1.68337	1.01619		1.68337	1.01179		1.68	1.00926		1.68337	1.0054		1.66667	1.00197
1.68537	1.02706		1.68537	1.02568		1.68537	1.02151		1.68537	1.01612		1.68537	1.01183		1.682	1.00925		1.68537	1.00535		1.66865	1.00194
1.68737	1.02709		1.68737	1.02556		1.68737	1.0215		1.68737	1.01596		1.68737	1.01168		1.684	1.0092		1.68737	1.00529		1.67063	1.00183
1.68938	1.02711		1.68938	1.02562		1.68938	1.02154		1.68938	1.01605		1.68938	1.01171		1.686	1.00915		1.68938	1.00526		1.67262	1.00186
1.69138	1.02704		1.69138	1.02567		1.69138	1.02147		1.69138	1.01595		1.69138	1.01162		1.688	1.00916		1.69138	1.00511		1.6746	1.00188
1.69339	1.02708		1.69339	1.02564		1.69339	1.02151		1.69339	1.0159		1.69339	1.01151		1.69	1.00906		1.69339	1.00515		1.67659	1.00185
1.69539	1.02709		1.69539	1.02572		1.69539	1.0215		1.69539	1.0158		1.69539	1.01146		1.692	1.00897		1.69539	1.00513		1.67857	1.00186
1.69739	1.02703		1.69739	1.0257		1.69739	1.02144		1.69739	1.01585		1.69739	1.01137		1.694	1.00898		1.69739	1.00502		1.68056	1.00174
1.6994	1.02702		1.6994	1.02565		1.6994	1.02127		1.6994	1.01571		1.6994	1.01139		1.696	1.00903		1.6994	1.0051		1.68254	1.00174
1.7014	1.02684		1.7014	1.02551		1.7014	1.02131		1.7014	1.01564		1.7014	1.01135		1.698	1.00887		1.7014	1.00506		1.68452	1.00181
1.70341	1.02693		1.70341	1.0256		1.70341	1.02128		1.70341	1.01576		1.70341	1.01137		1.7	1.00887		1.70341	1.0051		1.68651	1.00177
1.70541	1.02701		1.70541	1.02556		1.70541	1.02131		1.70541	1.0157		1.70541	1.01127		1.702	1.00879		1.70541	1.00502		1.68849	1.00179
1.70741	1.02706		1.70741	1.02562		1.70741	1.02125		1.70741	1.01568		1.70741	1.01121		1.704	1.00878		1.70741	1.00492		1.69048	1.00174
1.70942	1.02694		1.70942	1.02539		1.70942	1.0212		1.70942	1.01567		1.70942	1.01112		1.706	1.00868		1.70942	1.00486		1.69246	1.00175
1.71142	1.02689		1.71142	1.02533		1.71142	1.02111		1.71142	1.01562		1.71142	1.01112		1.708	1.00871		1.71142	1.00492		1.69444	1.00167
1.71343	1.02683		1.71343	1.02526		1.71343	1.02116		1.71343	1.0156		1.71343	1.011		1.71	1.00864		1.71343	1.00488		1.69643	1.0017
1.71543	1.02673		1.71543	1.02529		1.71543	1.02095		1.71543	1.01545		1.71543	1.01107		1.712	1.00863		1.71543	1.00478		1.69841	1.00166
1.71743	1.02668		1.71743	1.02515		1.71743	1.02085		1.71743	1.01548		1.71743	1.01108		1.714	1.00856		1.71743	1.00469		1.7004	1.00169
1.71944	1.02673		1.71944	1.02522		1.71944	1.02075		1.71944	1.01546		1.71944	1.01084		1.716	1.00859		1.71944	1.00474		1.70238	1.00153
1.72144	1.02666		1.72144	1.02522		1.72144	1.02082		1.72144	1.01536		1.72144	1.01087		1.718	1.00852		1.72144	1.00467		1.70437	1.00154
1.72345	1.0266		1.72345	1.0252		1.72345	1.02078		1.72345	1.01519		1.72345	1.01075		1.72	1.00843		1.72345	1.00462		1.70635	1.00156
1.72545	1.02671		1.72545	1.02521		1.72545	1.02077		1.72545	1.01503		1.72545	1.01069		1.722	1.0084		1.72545	1.00458		1.70833	1.00165
1.72745	1.02663		1.72745	1.02511		1.72745	1.02069		1.72745	1.0151		1.72745	1.01059		1.724	1.00836		1.72745	1.00463		1.71032	1.00167
1.72946	1.02655		1.72946	1.02497		1.72946	1.02062		1.72946	1.01507		1.72946	1.01063		1.726	1.00831		1.72946	1.00453		1.7123	1.00166
1.73146	1.02658		1.73146	1.02495		1.73146	1.02067		1.73146	1.01498		1.73146	1.01058		1.728	1.0082		1.73146	1.00458		1.71429	1.0015
1.73347	1.02659		1.73347	1.0249		1.73347	1.02064		1.73347	1.01492		1.73347	1.0105		1.73	1.00819		1.73347	1.00449		1.71627	1.0015
1.73547	1.02654		1.73547	1.02489		1.73547	1.02053		1.73547	1.01477		1.73547	1.01044		1.732	1.00809		1.73547	1.00443		1.71825	1.00151
1.73747	1.02652		1.73747	1.02485		1.73747	1.02039		1.73747	1.01471		1.73747	1.01037		1.734	1.00798		1.73747	1.00431		1.72024	1.00156
1.73948	1.0265		1.73948	1.02478		1.73948	1.02036		1.73948	1.01467		1.73948	1.01038		1.736	1.00798		1.73948	1.00429		1.72222	1.00147
1.74148	1.02642		1.74148	1.02481		1.74148	1.02024		1.74148	1.01458		1.74148	1.01025		1.738	1.00791		1.74148	1.0043		1.72421	1.00149
1.74349	1.02642		1.74349	1.02479		1.74349	1.02016		1.74349	1.0146		1.74349	1.01029		1.74	1.0079		1.74349	1.00434		1.72619	1.00146
1.74549	1.02636		1.74549	1.02468		1.74549	1.02012		1.74549	1.01458		1.74549	1.01011		1.742	1.00788		1.74549	1.00428		1.72817	1.00141
1.74749	1.02633		1.74749	1.0247		1.74749	1.02006		1.74749	1.01439		1.74749	1.01016		1.744	1.0078		1.74749	1.00413		1.73016	1.00138
1.7495	1.0263		1.7495	1.02475		1.7495	1.02002		1.7495	1.01436		1.7495	1.01006		1.746	1.00772		1.7495	1.00412		1.73214	1.00139
1.7515	1.02628		1.7515	1.02464		1.7515	1.0199		1.7515	1.01435		1.7515	1.00997		1.748	1.00765		1.7515	1.00408		1.73413	1.0014
1.75351	1.02614		1.75351	1.02454		1.75351	1.01984		1.75351	1.01429		1.75351	1.01001		1.75	1.00759		1.75351	1.00401		1.73611	1.00134
1.75551	1.02608		1.75551	1.02449		1.75551	1.01981		1.75551	1.01429		1.75551	1.00994		1.752	1.00747		1.75551	1.00397		1.7381	1.00137
1.75752	1.02605		1.75752	1.02448		1.75752	1.0197		1.75752	1.01414		1.75752	1.00986		1.754	1.00755		1.75752	1.00402		1.74008	1.00134
1.75952	1.02596		1.75952	1.02442		1.75952	1.01972		1.75952	1.01395		1.75952	1.00984		1.756	1.00746		1.75952	1.00389		1.74206	1.00136
1.76152	1.02602		1.76152	1.02439		1.76152	1.01963		1.76152	1.01388		1.76152	1.00979		1.758	1.00746		1.76152	1.0039		1.74405	1.0013
1.76353	1.02583		1.76353	1.02427		1.76353	1.01963		1.76353	1.01391		1.76353	1.00957		1.76	1.00742		1.76353	1.00396		1.74603	1.0012
1.76553	1.02591		1.76553	1.02428		1.76553	1.01964		1.76553	1.01377		1.76553	1.00953		1.762	1.00737		1.76553	1.00395		1.74802	1.00122
1.76754	1.0258		1.76754	1.02409		1.76754	1.01955		1.76754	1.01364		1.76754	1.00945		1.764	1.00733		1.76754	1.00387		1.75	1.00123
1.76954	1.02561		1.76954	1.02397		1.76954	1.01938		1.76954	1.01361		1.76954	1.00939		1.766	1.00728		1.76954	1.0038		1.75198	1.00126
1.77154	1.02566		1.77154	1.02397		1.77154	1.01931		1.77154	1.0137		1.77154	1.00939		1.768	1.00715		1.77154	1.00379		1.75397	1.00122
1.77355	1.02555		1.77355	1.02381		1.77355	1.01922		1.77355	1.01358		1.77355	1.00935		1.77	1.00713		1.77355	1.00376		1.75595	1.00124
1.77555	1.02565		1.77555	1.02376		1.77555	1.01912		1.77555	1.01348		1.77555	1.00922		1.772	1.00705		1.77555	1.0036		1.75794	1.0012
1.77756	1.02554		1.77756	1.02365		1.77756	1.019		1.77756	1.01349		1.77756	1.00914		1.774	1.00695		1.77756	1.00362		1.75992	1.00125
1.77956	1.02544		1.77956	1.02368		1.77956	1.01894		1.77956	1.01328		1.77956	1.00909		1.776	1.00692		1.77956	1.00348		1.7619	1.00118
1.78156	1.02545		1.78156	1.02359		1.78156	1.01884		1.78156	1.0133		1.78156	1.00896		1.778	1.00692		1.78156	1.00349		1.76389	1.00116
1.78357	1.0254		1.78357	1.0237		1.78357	1.01872		1.78357	1.01323		1.78357	1.00882		1.78	1.00681		1.78357	1.00345		1.76587	1.00125
1.78557	1.02541		1.78557	1.02352		1.78557	1.0187		1.78557	1.01319		1.78557	1.00878		1.782	1.00672		1.78557	1.00336		1.76786	1.00121
1.78758	1.02544		1.78758	1.02347		1.78758	1.01856		1.78758	1.01295		1.78758	1.0087		1.784	1.00677		1.78758	1.00336		1.76984	1.00121
1.78958	1.02534		1.78958	1.02343		1.78958	1.01852		1.78958	1.01286		1.78958	1.00867		1.786	1.00663		1.78958	1.00334		1.77183	1.00113
1.79158	1.02535		1.79158	1.0233		1.79158	1.01847		1.79158	1.01279		1.79158	1.00843		1.788	1.00669		1.79158	1.00338		1.77381	1.00103
1.79359	1.02528		1.79359	1.02318		1.79359	1.01838		1.79359	1.01262		1.79359	1.00841		1.79	1.00661		1.79359	1.00331		1.77579	1.00105
1.79559	1.02512		1.79559	1.02315		1.79559	1.01834		1.79559	1.01253		1.79559	1.00834		1.792	1.00659		1.79559	1.00323		1.77778	1.00108
1.7976	1.02509		1.7976	1.02308		1.7976	1.01821		1.7976	1.01257		1.7976	1.00832		1.794	1.00644		1.7976	1.00312		1.77976	1.0011
1.7996	1.02492		1.7996	1.02308		1.7996	1.0181		1.7996	1.01261		1.7996	1.00815		1.796	1.00642		1.7996	1.0031		1.78175	1.00103
1.8016	1.02486		1.8016	1.02302		1.8016	1.01796		1.8016	1.01252		1.8016	1.00811		1.798	1.00629		1.8016	1.00301		1.78373	1.00099
1.80361	1.02486		1.80361	1.02303		1.80361	1.01788		1.80361	1.01244		1.80361	1.00797		1.8	1.0062		1.80361	1.003		1.78571	1.00098
1.80561	1.02483		1.80561	1.02289		1.80561	1.01787		1.80561	1.01238		1.80561	1.00793		1.802	1.00625		1.80561	1.00293		1.7877	1.00102
1.80762	1.02475		1.80762	1.02284		1.80762	1.01779		1.80762	1.01214		1.80762	1.00789		1.804	1.0062		1.80762	1.00291		1.78968	1.00093
1.80962	1.02479		1.80962	1.02279		1.80962	1.01773		1.80962	1.01199		1.80962	1.00786		1.806	1.00613		1.80962	1.00282		1.79167	1.00091
1.81162	1.02459		1.81162	1.02261		1.81162	1.01757		1.81162	1.01192		1.81162	1.00784		1.808	1.00611		1.81162	1.00282		1.79365	1.00084
1.81363	1.02457		1.81363	1.02246		1.81363	1.01748		1.81363	1.01177		1.81363	1.00768		1.81	1.00593		1.81363	1.00274		1.79563	1.00085
1.81563	1.02447		1.81563	1.02235		1.81563	1.0174		1.81563	1.01183		1.81563	1.00767		1.812	1.00588		1.81563	1.00274		1.79762	1.00087
1.81764	1.02438		1.81764	1.02237		1.81764	1.01727		1.81764	1.01165		1.81764	1.0076		1.814	1.00585		1.81764	1.00265		1.7996	1.00085
1.81964	1.02437		1.81964	1.02212		1.81964	1.01707		1.81964	1.01147		1.81964	1.00752		1.816	1.00572		1.81964	1.00258		1.80159	1.00083
1.82164	1.02423		1.82164	1.02214		1.82164	1.01698		1.82164	1.01142		1.82164	1.00738		1.818	1.00564		1.82164	1.00262		1.80357	1.00086
1.82365	1.02404		1.82365	1.02202		1.82365	1.01679		1.82365	1.01141		1.82365	1.00741		1.82	1.00563		1.82365	1.00262		1.80556	1.00084
1.82565	1.02411		1.82565	1.02194		1.82565	1.01664		1.82565	1.01125		1.82565	1.0072		1.822	1.00557		1.82565	1.00258		1.80754	1.00086
1.82766	1.02415		1.82766	1.02184		1.82766	1.01657		1.82766	1.01111		1.82766	1.00722		1.824	1.00545		1.82766	1.00248		1.80952	1.00084
1.82966	1.02403		1.82966	1.02169		1.82966	1.01639		1.82966	1.01104		1.82966	1.00716		1.826	1.00531		1.82966	1.00244		1.81151	1.00084
1.83166	1.02389		1.83166	1.02164		1.83166	1.01639		1.83166	1.01092		1.83166	1.00701		1.828	1.00515		1.83166	1.00235		1.81349	1.00076
1.83367	1.02387		1.83367	1.02158		1.83367	1.01632		1.83367	1.01075		1.83367	1.00694		1.83	1.005		1.83367	1.00233		1.81548	1.00069
1.83567	1.02382		1.83567	1.02143		1.83567	1.01616		1.83567	1.01062		1.83567	1.00684		1.832	1.00513		1.83567	1.00229		1.81746	1.00078
1.83768	1.02377		1.83768	1.02133		1.83768	1.01598		1.83768	1.01043		1.83768	1.00674		1.834	1.00517		1.83768	1.00216		1.81944	1.00074
1.83968	1.02374		1.83968	1.02121		1.83968	1.01589		1.83968	1.01027		1.83968	1.00664		1.836	1.00513		1.83968	1.00217		1.82143	1.00073
1.84168	1.02354		1.84168	1.02103		1.84168	1.01565		1.84168	1.01023		1.84168	1.0065		1.838	1.00498		1.84168	1.00218		1.82341	1.00077
1.84369	1.02353		1.84369	1.02106		1.84369	1.01558		1.84369	1.01003		1.84369	1.00637		1.84	1.00498		1.84369	1.00209		1.8254	1.00073
1.84569	1.02336		1.84569	1.02092		1.84569	1.01533		1.84569	1.00996		1.84569	1.00634		1.842	1.00483		1.84569	1.00207		1.82738	1.00079
1.8477	1.02334		1.8477	1.02083		1.8477	1.01533		1.8477	1.00991		1.8477	1.0062		1.844	1.00474		1.8477	1.002		1.82937	1.00065
1.8497	1.02328		1.8497	1.02068		1.8497	1.01533		1.8497	1.0098		1.8497	1.00611		1.846	1.00468		1.8497	1.00203		1.83135	1.00058
1.8517	1.02304		1.8517	1.02053		1.8517	1.01526		1.8517	1.00972		1.8517	1.00592		1.848	1.00449		1.8517	1.00198		1.83333	1.00063
1.85371	1.02308		1.85371	1.02043		1.85371	1.01499		1.85371	1.00949		1.85371	1.00579		1.85	1.00436		1.85371	1.00188		1.83532	1.00051
1.85571	1.02294		1.85571	1.02029		1.85571	1.01482		1.85571	1.00929		1.85571	1.00569		1.852	1.00432		1.85571	1.00182		1.8373	1.0006
1.85772	1.02285		1.85772	1.02015		1.85772	1.0147		1.85772	1.00914		1.85772	1.00568		1.854	1.00426		1.85772	1.0018		1.83929	1.0006
1.85972	1.02284		1.85972	1.02		1.85972	1.01461		1.85972	1.00906		1.85972	1.00565		1.856	1.00417		1.85972	1.00165		1.84127	1.00057
1.86172	1.02271		1.86172	1.01979		1.86172	1.01446		1.86172	1.00886		1.86172	1.00557		1.858	1.00419		1.86172	1.00172		1.84325	1.00057
1.86373	1.02256		1.86373	1.01967		1.86373	1.01425		1.86373	1.00888		1.86373	1.00551		1.86	1.00413		1.86373	1.00166		1.84524	1.00057
1.86573	1.02235		1.86573	1.01958		1.86573	1.0141		1.86573	1.00868		1.86573	1.00533		1.862	1.00404		1.86573	1.00162		1.84722	1.00054
1.86774	1.02225		1.86774	1.01948		1.86774	1.01393		1.86774	1.00861		1.86774	1.00527		1.864	1.00402		1.86774	1.00158		1.84921	1.00051
1.86974	1.02211		1.86974	1.01924		1.86974	1.01375		1.86974	1.00847		1.86974	1.00518		1.866	1.00391		1.86974	1.0015		1.85119	1.00049
1.87174	1.02209		1.87174	1.01903		1.87174	1.01361		1.87174	1.00826		1.87174	1.00508		1.868	1.00382		1.87174	1.00151		1.85317	1.00052
1.87375	1.02185		1.87375	1.01891		1.87375	1.01341		1.87375	1.00809		1.87375	1.00497		1.87	1.00376		1.87375	1.00139		1.85516	1.00043
1.87575	1.02182		1.87575	1.01872		1.87575	1.01318		1.87575	1.00799		1.87575	1.00483		1.872	1.00374		1.87575	1.0012		1.85714	1.00047
1.87776	1.02178		1.87776	1.01866		1.87776	1.01313		1.87776	1.00789		1.87776	1.00476		1.874	1.00358		1.87776	1.00126		1.85913	1.00046
1.87976	1.02165		1.87976	1.01846		1.87976	1.01289		1.87976	1.00766		1.87976	1.00472		1.876	1.00344		1.87976	1.00116		1.86111	1.00037
1.88176	1.02141		1.88176	1.01834		1.88176	1.0128		1.88176	1.00769		1.88176	1.0046		1.878	1.0035		1.88176	1.00118		1.8631	1.00034
1.88377	1.02131		1.88377	1.01815		1.88377	1.01254		1.88377	1.00749		1.88377	1.00441		1.88	1.00344		1.88377	1.00117		1.86508	1.00042
1.88577	1.02114		1.88577	1.01797		1.88577	1.01242		1.88577	1.00732		1.88577	1.0043		1.882	1.00335		1.88577	1.00109		1.86706	1.00037
1.88778	1.02093		1.88778	1.01778		1.88778	1.01223		1.88778	1.00726		1.88778	1.00415		1.884	1.00322		1.88778	1.00106		1.86905	1.00035
1.88978	1.02082		1.88978	1.01754		1.88978	1.0121		1.88978	1.00709		1.88978	1.00401		1.886	1.0031		1.88978	1.00096		1.87103	1.00036
1.89178	1.02055		1.89178	1.01743		1.89178	1.01191		1.89178	1.00696		1.89178	1.00391		1.888	1.00305		1.89178	1.00095		1.87302	1.00048
1.89379	1.02037		1.89379	1.01725		1.89379	1.01176		1.89379	1.00677		1.89379	1.00371		1.89	1.00297		1.89379	1.00091		1.875	1.00031
1.89579	1.02024		1.89579	1.01699		1.89579	1.01154		1.89579	1.00666		1.89579	1.00377		1.892	1.00284		1.89579	1.00089		1.87698	1.00033
1.8978	1.02019		1.8978	1.01679		1.8978	1.01136		1.8978	1.00652		1.8978	1.00357		1.894	1.00278		1.8978	1.00087		1.87897	1.00036
1.8998	1.02		1.8998	1.01651		1.8998	1.01116		1.8998	1.00631		1.8998	1.00353		1.896	1.00268		1.8998	1.0008		1.88095	1.00036
1.9018	1.01972		1.9018	1.01634		1.9018	1.01105		1.9018	1.00614		1.9018	1.00348		1.898	1.00271		1.9018	1.00086		1.88294	1.00029
1.90381	1.01947		1.90381	1.01628		1.90381	1.0108		1.90381	1.00588		1.90381	1.00329		1.9	1.0026		1.90381	1.00075		1.88492	1.00029
1.90581	1.01928		1.90581	1.01599		1.90581	1.01056		1.90581	1.00574		1.90581	1.00319		1.902	1.00248		1.90581	1.00073		1.8869	1.00019
1.90782	1.01921		1.90782	1.01584		1.90782	1.0103		1.90782	1.00562		1.90782	1.00308		1.904	1.00241		1.90782	1.00066		1.88889	1.0002
1.90982	1.01905		1.90982	1.01551		1.90982	1.01013		1.90982	1.00554		1.90982	1.003		1.906	1.00239		1.90982	1.00055		1.89087	1.00019
1.91182	1.01884		1.91182	1.01534		1.91182	1.00989		1.91182	1.00552		1.91182	1.00287		1.908	1.00227		1.91182	1.00055		1.89286	1.00027
1.91383	1.01866		1.91383	1.01495		1.91383	1.00962		1.91383	1.0053		1.91383	1.00275		1.91	1.00219		1.91383	1.00048		1.89484	1.00015
1.91583	1.01838		1.91583	1.01478		1.91583	1.00941		1.91583	1.00508		1.91583	1.00264		1.912	1.00214		1.91583	1.0005		1.89683	1.00021
1.91784	1.01812		1.91784	1.01458		1.91784	1.00916		1.91784	1.00498		1.91784	1.00256		1.914	1.00215		1.91784	1.00049		1.89881	1.0002
1.91984	1.0179		1.91984	1.01433		1.91984	1.00895		1.91984	1.00476		1.91984	1.0025		1.916	1.0021		1.91984	1.00037		1.90079	1.00017
1.92184	1.01774		1.92184	1.01411		1.92184	1.00872		1.92184	1.00463		1.92184	1.0024		1.918	1.0019		1.92184	1.00033		1.90278	1.00018
1.92385	1.01751		1.92385	1.01388		1.92385	1.0085		1.92385	1.00447		1.92385	1.00228		1.92	1.0018		1.92385	1.00033		1.90476	1.00013
1.92585	1.01716		1.92585	1.01359		1.92585	1.00827		1.92585	1.00436		1.92585	1.00207		1.922	1.00184		1.92585	1.00033		1.90675	1.00015
1.92786	1.01695		1.92786	1.01331		1.92786	1.00801		1.92786	1.00408		1.92786	1.00198		1.924	1.00175		1.92786	1.00027		1.90873	1.00013
1.92986	1.01658		1.92986	1.01287		1.92986	1.00769		1.92986	1.00394		1.92986	1.00192		1.926	1.00165		1.92986	1.00016		1.91071	1.00014
1.93186	1.01628		1.93186	1.01248		1.93186	1.00738		1.93186	1.00374		1.93186	1.00178		1.928	1.00153		1.93186	1.00021		1.9127	1.00016
1.93387	1.01605		1.93387	1.01221		1.93387	1.00714		1.93387	1.0036		1.93387	1.00164		1.93	1.00139		1.93387	1.00015		1.91468	1.00005
1.93587	1.01572		1.93587	1.01193		1.93587	1.00687		1.93587	1.00342		1.93587	1.00155		1.932	1.0014		1.93587	1.00011		1.91667	1.00014
1.93788	1.01537		1.93788	1.01167		1.93788	1.00653		1.93788	1.00329		1.93788	1.00149		1.934	1.00134		1.93788	1		1.91865	1.00008
1.93988	1.01513		1.93988	1.01135		1.93988	1.00626		1.93988	1.00308		1.93988	1.00133		1.936	1.0012		1.93988	1.00006		1.92063	1.00006
1.94188	1.01474		1.94188	1.01099		1.94188	1.00613		1.94188	1.00284		1.94188	1.00122		1.938	1.00127		1.94188	0.999981		1.92262	1.00009
1.94389	1.01427		1.94389	1.0107		1.94389	1.00591		1.94389	1.00264		1.94389	1.00111		1.94	1.0011		1.94389	0.999959		1.9246	1
1.94589	1.01409		1.94589	1.01042		1.94589	1.0056		1.94589	1.00249		1.94589	1.001		1.942	1.001		1.94589	0.999921		1.92659	1.00003
1.9479	1.01366		1.9479	1.0101		1.9479	1.00536		1.9479	1.0022		1.9479	1.00086		1.944	1.00088		1.9479	0.999876		1.92857	1.00004
1.9499	1.01307		1.9499	1.00967		1.9499	1.00507		1.9499	1.00205		1.9499	1.00077		1.946	1.00091		1.9499	0.999799		1.93056	1.00001
1.9519	1.0129		1.9519	1.00933		1.9519	1.0048		1.9519	1.00198		1.9519	1.0008		1.948	1.00079		1.9519	0.999911		1.93254	1
1.95391	1.01246		1.95391	1.00897		1.95391	1.00451		1.95391	1.00188		1.95391	1.00071		1.95	1.00085		1.95391	0.99983		1.93452	0.999972
1.95591	1.01201		1.95591	1.00853		1.95591	1.00414		1.95591	1.00169		1.95591	1.00057		1.952	1.00068		1.95591	0.999887		1.93651	1.00008
1.95792	1.01163		1.95792	1.00808		1.95792	1.0039		1.95792	1.00148		1.95792	1.00047		1.954	1.00071		1.95792	0.999765		1.93849	0.999995
1.95992	1.01122		1.95992	1.00764		1.95992	1.00359		1.95992	1.00135		1.95992	1.0004		1.956	1.00058		1.95992	0.99992		1.94048	1.00004
1.96192	1.01078		1.96192	1.00728		1.96192	1.00324		1.96192	1.00124		1.96192	1.00037		1.958	1.00051		1.96192	0.999811		1.94246	1.00002
1.96393	1.01035		1.96393	1.00678		1.96393	1.00297		1.96393	1.00109		1.96393	1.00036		1.96	1.00048		1.96393	0.999757		1.94444	0.999996
1.96593	1.00981		1.96593	1.00631		1.96593	1.00258		1.96593	1.00101		1.96593	1.00016		1.962	1.00045		1.96593	0.999814		1.94643	1.00005
1.96794	1.00925		1.96794	1.00593		1.96794	1.00232		1.96794	1.00082		1.96794	1.00021		1.964	1.00029		1.96794	0.999765		1.94841	1.00003
1.96994	1.00871		1.96994	1.00556		1.96994	1.00209		1.96994	1.00079		1.96994	1.00011		1.966	1.00025		1.96994	0.999784		1.9504	0.999978
1.97194	1.00825		1.97194	1.00508		1.97194	1.00191		1.97194	1.0005		1.97194	1.00002		1.968	1.00021		1.97194	0.999777		1.95238	0.999965
1.97395	1.00784		1.97395	1.00455		1.97395	1.00168		1.97395	1.00036		1.97395	1		1.97	1.00021		1.97395	0.999762		1.95437	0.999961
1.97595	1.00725		1.97595	1.00413		1.97595	1.00126		1.97595	1.00034		1.97595	0.999804		1.972	1.00016		1.97595	0.999768		1.95635	1.00003
1.97796	1.00662		1.97796	1.00372		1.97796	1.00104		1.97796	1.00011		1.97796	0.999787		1.974	1.0001		1.97796	0.99957		1.95833	0.99999
1.97996	1.00603		1.97996	1.00326		1.97996	1.00075		1.97996	0.999997		1.97996	0.999757		1.976	1.00008		1.97996	0.999763		1.96032	1.00002
1.98196	1.00538		1.98196	1.00289		1.98196	1.00053		1.98196	0.999845		1.98196	0.999739		1.978	1.00004		1.98196	0.999768		1.9623	1
1.98397	1.00472		1.98397	1.00256		1.98397	1.00048		1.98397	0.999717		1.98397	0.999712		1.98	1.00005		1.98397	0.999856		1.96429	1.00004
1.98597	1.00427		1.98597	1.00191		1.98597	1.00031		1.98597	0.999735		1.98597	0.999757		1.982	0.999987		1.98597	0.9998		1.96627	1.00002
1.98798	1.00358		1.98798	1.00139		1.98798	1.00021		1.98798	0.999772		1.98798	0.999732		1.984	1.00002		1.98798	0.999775		1.96825	1.00007
1.98998	1.00299		1.98998	1.00111		1.98998	1.00002		1.98998	0.999688		1.98998	0.999742		1.986	0.999927		1.98998	0.999855		1.97024	1.00003
1.99198	1.00233		1.99198	1.00065		1.99198	0.999924		1.99198	0.999755		1.99198	0.999799		1.988	0.999917		1.99198	0.99989		1.97222	1.00012
1.99399	1.00173		1.99399	1.00046		1.99399	0.999795		1.99399	0.999799		1.99399	0.99978		1.99	1.00002		1.99399	0.999924		1.97421	1.00013
1.99599	1.00124		1.99599	1.00018		1.99599	0.999834		1.99599	0.999853		1.99599	0.999841		1.992	0.999978		1.99599	0.999844		1.97619	1.00011
1.998	1.00079		1.998	1.00007		1.998	0.999805		1.998	0.999878		1.998	0.999795		1.994	0.9999		1.998	0.999795		1.97817	1.00003
2	1.00033		2	0.999942		2	0.999777		2	0.999933		2	0.999821		1.996	1		2	0.999841		1.98016	1.00002
															1.998	1					1.98214	1.00004
															2	0.999958					1.98413	1.00008
																					1.98611	1.00006
																					1.9881	1.00006
																					1.99008	1.00002
																					1.99206	1.00006
																					1.99405	0.999867
																					1.99603	0.999885
																					1.99802	0.999988
																					2	0.999994
