# Supplementary material for: Characterization of fine particles using optomagnetic measurements
Source: Royal Society of Chemistry journal article supplement (doi:10.1039/c6cp08749c), 2017-01-01
Supplement: c6cp08749c2.zip [file fig6.xls]

## Sheet: 6b
$f$ [Hz]	M80, , fit		$f$ [Hz]	M80, , fzero		$f$ [Hz]	M80, $V_2^{\prime\prime}/V_0$	LData	UData		$f$ [Hz]	M100, , fit		$f$ [Hz]	M100, , fzero		$f$ [Hz]	M100, $V_2^{\prime\prime}/V_0$	LData	UData
4.00014	-0.00141373		269.085	0		2603.49	1.69941e-05	3.20014e-06	3.20014e-06		4.00008	-0.00045175		552.687	0		2603.49	8.17839e-06	8.92215e-07	8.92215e-07
4.27065	-0.00141198					2185.41	1.80899e-05	1.05588e-08	1.05588e-08		4.27059	-0.000451473					2185.41	1.11482e-05	1.26668e-06	1.26668e-06
4.55946	-0.00141					1831.33	2.40155e-05	1.76104e-06	1.76104e-06		4.55939	-0.000451161					1831.33	1.14414e-05	5.38239e-07	5.38239e-07
4.8678	-0.00140779					1538.7	3.26759e-05	9.17588e-07	9.17588e-07		4.86773	-0.00045081					1538.7	1.60745e-05	7.29172e-07	7.29172e-07
5.19698	-0.0014053					1290.52	4.11639e-05	1.31131e-06	1.31131e-06		5.19691	-0.000450414					1290.52	1.48166e-05	7.08427e-07	7.08427e-07
5.54843	-0.00140252					1084.79	4.58989e-05	3.88145e-06	3.88145e-06		5.54835	-0.00044997					1084.79	1.62763e-05	1.00079e-06	1.00079e-06
5.92365	-0.0013994					910.034	5.84602e-05	2.39669e-06	2.39669e-06		5.92357	-0.00044947					910.034	1.29206e-05	7.81466e-07	7.81466e-07
6.32424	-0.00139591					763.779	6.89986e-05	1.93463e-06	1.93463e-06		6.32415	-0.000448909					763.779	1.01168e-05	1.0427e-06	1.0427e-06
6.75192	-0.00139202					641.116	7.40157e-05	1.32387e-06	1.32387e-06		6.75183	-0.000448281					641.116	5.66075e-06	1.97102e-06	1.97102e-06
7.20852	-0.00138769					537.525	7.67891e-05	7.7678e-07	7.7678e-07		7.20843	-0.000447577					537.525	-2.66938e-07	7.3037e-07	7.3037e-07
7.696	-0.00138287					451.586	7.01752e-05	1.39659e-06	1.39659e-06		7.6959	-0.000446791					451.586	-1.33619e-05	9.88119e-07	9.88119e-07
8.21645	-0.00137752					379.458	5.77913e-05	1.62478e-06	1.62478e-06		8.21634	-0.000445912					379.646	-2.60623e-05	7.20738e-07	7.20738e-07
8.77209	-0.00137159					318.142	3.55226e-05	1.76764e-06	1.76764e-06		8.77198	-0.000444934					318.79	-4.39143e-05	1.2665e-06	1.2665e-06
9.36531	-0.00136503					266.995	-3.74136e-06	1.23044e-06	1.23044e-06		9.36519	-0.000443844					267.261	-6.73356e-05	7.26312e-07	7.26312e-07
9.99865	-0.00135778					224.169	-5.12974e-05	2.74275e-07	2.74275e-07		9.99852	-0.000442633					224.329	-9.16795e-05	1.23197e-06	1.23197e-06
10.6748	-0.0013498					188.413	-0.000119038	1.6218e-06	1.6218e-06		10.6747	-0.000441289					188.157	-0.000119149	1.45728e-06	1.45728e-06
11.3967	-0.00134102					158.084	-0.000191865	1.73358e-06	1.73358e-06		11.3966	-0.000439801					158.06	-0.000147494	1.99845e-06	1.99845e-06
12.1674	-0.00133139					132.694	-0.000284282	1.04076e-06	1.04076e-06		12.1673	-0.000438155					132.564	-0.00017752	5.90704e-07	5.90704e-07
12.9902	-0.00132086					111.315	-0.000380283	2.11658e-06	2.11658e-06		12.9901	-0.000436339					111.329	-0.000210431	2.48492e-06	2.48492e-06
13.8687	-0.00130935					93.5001	-0.000478586	1.26936e-06	1.26936e-06		13.8685	-0.000434338					93.4317	-0.000240692	1.46617e-06	1.46617e-06
14.8066	-0.00129681					78.4265	-0.000576658	3.94812e-06	3.94812e-06		14.8064	-0.000432137					78.4591	-0.000269471	1.46138e-06	1.46138e-06
15.8079	-0.0012832					65.8413	-0.000674131	3.12847e-06	3.12847e-06		15.8077	-0.000429723					65.8869	-0.000295785	1.51273e-06	1.51273e-06
16.8769	-0.00126844					55.2666	-0.000765785	3.185e-06	3.185e-06		16.8767	-0.000427079					55.2723	-0.000321108	1.17976e-06	1.17976e-06
18.0182	-0.00125248					46.4033	-0.000856571	2.58881e-06	2.58881e-06		18.018	-0.000424191					46.3875	-0.000343513	3.10547e-06	3.10547e-06
19.2367	-0.00123529					38.9606	-0.000936838	7.27282e-06	7.27282e-06		19.2365	-0.000421041					38.9446	-0.000358946	2.26451e-06	2.26451e-06
20.5376	-0.0012168					32.6946	-0.00100894	6.88176e-06	6.88176e-06		20.5374	-0.000417614					32.6858	-0.000373335	1.75457e-06	1.75457e-06
21.9265	-0.00119699					27.4472	-0.00107282	1.25559e-07	1.25559e-07		21.9263	-0.000413896					27.437	-0.0003923	9.50881e-07	9.50881e-07
23.4093	-0.00117582					23.0398	-0.00114556	1.31313e-07	1.31313e-07		23.409	-0.000409869					23.0307	-0.000404546	2.26305e-06	2.26305e-06
24.9924	-0.00115326					19.338	-0.00118388	3.60333e-06	3.60333e-06		24.9921	-0.00040552					19.3372	-0.000411109	1.2977e-06	1.2977e-06
26.6825	-0.0011293					16.2316	-0.00123448	5.275e-06	5.275e-06		26.6822	-0.000400833					16.2293	-0.000422449	2.64994e-06	2.64994e-06
28.4869	-0.00110394					13.6254	-0.00126214	4.11522e-06	4.11522e-06		28.4866	-0.000395797					13.6252	-0.000435269	1.01738e-06	1.01738e-06
30.4133	-0.00107716					11.4358	-0.00129717	5.57109e-06	5.57109e-06		30.413	-0.000390398					11.4371	-0.00044012	7.72174e-07	7.72174e-07
32.4701	-0.001049					9.5991	-0.00132248	4.18136e-06	4.18136e-06		32.4697	-0.000384626					9.59874	-0.000445491	1.50749e-06	1.50749e-06
34.6659	-0.00101947					8.05796	-0.00134258	4.25114e-06	4.25114e-06		34.6655	-0.000378472					8.05672	-0.00044971	2.24361e-06	2.24361e-06
37.0102	-0.000988623					6.76275	-0.00135698	1.60864e-06	1.60864e-06		37.0098	-0.000371928					6.76364	-0.000452563	1.20383e-06	1.20383e-06
39.513	-0.0009565					5.67692	-0.00137813	2.84698e-06	2.84698e-06		39.5126	-0.000364989					5.67677	-0.000453832	1.44038e-06	1.44038e-06
42.1851	-0.000923172					4.76553	-0.00138264	4.92639e-06	4.92639e-06		42.1847	-0.000357653					4.76542	-0.000454678	1.70106e-06	1.70106e-06
45.0379	-0.000888718					4.00014	-0.00138962	5.73516e-06	5.73516e-06		45.0375	-0.000349919					4.00008	-0.000458724	2.28622e-06	2.28622e-06
48.0836	-0.000853229										48.0832	-0.000341789
51.3353	-0.000816812										51.3348	-0.000333269
54.8069	-0.000779584										54.8064	-0.000324368
58.5132	-0.000741675										58.5127	-0.000315097
62.4702	-0.000703223										62.4697	-0.000305471
66.6948	-0.000664376										66.6943	-0.000295509
71.2051	-0.000625291										71.2045	-0.000285232
76.0204	-0.000586129										76.0198	-0.000274665
81.1613	-0.000547056										81.1607	-0.000263837
86.6499	-0.00050824										86.6492	-0.000252777
92.5096	-0.000469848										92.5089	-0.000241522
98.7657	-0.000432047										98.7649	-0.000230106
105.445	-0.000394998										105.444	-0.000218568
112.576	-0.000358856										112.575	-0.00020695
120.189	-0.000323769										120.188	-0.000195293
128.316	-0.000289874										128.315	-0.000183641
136.994	-0.000257298										136.993	-0.000172038
146.258	-0.000226154										146.257	-0.000160527
156.149	-0.000196539										156.148	-0.000149154
166.709	-0.000168537										166.708	-0.00013796
177.982	-0.000142215										177.981	-0.000126988
190.019	-0.000117624										190.017	-0.000116278
202.869	-9.47988e-05										202.867	-0.000105868
216.588	-7.3756e-05										216.587	-9.57928e-05
231.235	-5.44973e-05										231.233	-8.60861e-05
246.872	-3.70087e-05										246.871	-7.67766e-05
263.567	-2.12613e-05										263.566	-6.78902e-05
281.391	-7.21283e-06										281.389	-5.94487e-05
300.42	5.19138e-06										300.419	-5.14702e-05
320.736	1.6017e-05										320.735	-4.39688e-05
342.426	2.53392e-05										342.425	-3.69543e-05
365.583	3.32409e-05										365.581	-3.04327e-05
390.306	3.98118e-05										390.304	-2.44058e-05
416.7	4.51458e-05										416.699	-1.88717e-05
444.88	4.93406e-05										444.878	-1.38246e-05
474.965	5.24952e-05										474.963	-9.25549e-06
507.085	5.47091e-05										507.083	-5.15203e-06
541.377	5.60808e-05										541.375	-1.49903e-06
577.988	5.6707e-05										577.986	1.72125e-06
617.075	5.66807e-05										617.073	4.5288e-06
658.805	5.60914e-05										658.803	6.94543e-06
703.357	5.50237e-05										703.355	8.99444e-06
750.922	5.35567e-05										750.92	1.07003e-05
801.704	5.17641e-05										801.701	1.20882e-05
855.919	4.97132e-05										855.917	1.31838e-05
913.801	4.74655e-05										913.799	1.40128e-05
975.598	4.50759e-05										975.596	1.46008e-05
1041.57	4.25934e-05										1041.57	1.4973e-05
1112.01	4.00608e-05										1112.01	1.51538e-05
1187.21	3.75154e-05										1187.21	1.51666e-05
1267.5	3.49887e-05										1267.49	1.5034e-05
1353.21	3.25072e-05										1353.21	1.4777e-05
1444.72	3.00927e-05										1444.72	1.44156e-05
1542.42	2.77627e-05										1542.42	1.39681e-05
1646.73	2.55305e-05										1646.73	1.34516e-05
1758.09	2.34064e-05										1758.09	1.28814e-05
1876.98	2.1397e-05										1876.98	1.22714e-05
2003.92	1.95068e-05										2003.92	1.1634e-05
2139.43	1.77375e-05										2139.43	1.09803e-05
2284.11	1.60892e-05										2284.11	1.03198e-05
2438.58	1.45603e-05										2438.58	9.66071e-06
2603.49	1.31478e-05										2603.49	9.01007e-06

## Sheet: 6a
	M80, , fit			M80, , fmax			M80, $V_2^\prime/V_0$	LData	UData			M100, , fit			M100, , fmax			M100, $V_2^\prime/V_0$	LData	UData
4.00014	-0.000112295		75.1955	-0.00068334		2603.49	-3.36739e-06	6.97351e-07	6.97351e-07		4.00008	-2.33337e-05		120.054	-0.000207384		2603.49	-1.24821e-05	9.11109e-07	9.11109e-07
4.27065	-0.000119539					2185.41	-9.76837e-06	3.43352e-06	3.43352e-06		4.27059	-2.48647e-05					2185.41	-1.45342e-05	2.06787e-06	2.06787e-06
4.55946	-0.000127209					1831.33	-1.23533e-05	1.62542e-06	1.62542e-06		4.55939	-2.64904e-05					1831.33	-2.03111e-05	1.03795e-06	1.03795e-06
4.8678	-0.000135322					1538.7	-2.13715e-05	1.43055e-06	1.43055e-06		4.86773	-2.82158e-05					1538.7	-2.55483e-05	8.433e-07	8.433e-07
5.19698	-0.000143896					1290.52	-3.15092e-05	1.20493e-06	1.20493e-06		5.19691	-3.00458e-05					1290.52	-3.34168e-05	2.49132e-06	2.49132e-06
5.54843	-0.000152947					1084.79	-4.89387e-05	4.69824e-07	4.69824e-07		5.54835	-3.19854e-05					1084.79	-4.2412e-05	1.2018e-06	1.2018e-06
5.92365	-0.000162492					910.034	-6.68482e-05	6.10506e-07	6.10506e-07		5.92357	-3.40397e-05					910.034	-5.37119e-05	1.15088e-06	1.15088e-06
6.32424	-0.000172546					763.779	-8.78809e-05	5.24339e-08	5.24339e-08		6.32415	-3.62137e-05					763.779	-7.00983e-05	9.09832e-07	9.09832e-07
6.75192	-0.00018312					641.116	-0.000126037	9.4111e-07	9.4111e-07		6.75183	-3.85124e-05					641.116	-8.22055e-05	3.34943e-07	3.34943e-07
7.20852	-0.000194227					537.525	-0.000167789	4.79431e-08	4.79431e-08		7.20843	-4.09408e-05					537.525	-0.000100744	4.55707e-07	4.55707e-07
7.696	-0.000205875					451.586	-0.000217682	9.91978e-07	9.91978e-07		7.6959	-4.35035e-05					451.586	-0.000116182	8.84396e-07	8.84396e-07
8.21645	-0.00021807					379.458	-0.000272327	1.19483e-06	1.19483e-06		8.21634	-4.6205e-05					379.646	-0.00013351	6.92322e-07	6.92322e-07
8.77209	-0.000230817					318.142	-0.000333681	8.29662e-07	8.29662e-07		8.77198	-4.90495e-05					318.79	-0.000152877	1.56733e-06	1.56733e-06
9.36531	-0.000244114					266.995	-0.000400556	5.39147e-07	5.39147e-07		9.36519	-5.2041e-05					267.261	-0.000168784	9.99856e-07	9.99856e-07
9.99865	-0.000257958					224.169	-0.000464488	5.24656e-08	5.24656e-08		9.99852	-5.51828e-05					224.329	-0.000182864	1.29407e-06	1.29407e-06
10.6748	-0.000272338					188.413	-0.000523478	3.56874e-06	3.56874e-06		10.6747	-5.84776e-05					188.157	-0.000191742	1.06289e-06	1.06289e-06
11.3967	-0.000287243					158.084	-0.000579541	3.77063e-06	3.77063e-06		11.3966	-6.19278e-05					158.06	-0.000204106	6.40882e-07	6.40882e-07
12.1674	-0.000302651					132.694	-0.000621703	2.53284e-06	2.53284e-06		12.1673	-6.55348e-05					132.564	-0.000205018	1.44475e-06	1.44475e-06
12.9902	-0.000318539					111.315	-0.000657432	2.9264e-06	2.9264e-06		12.9901	-6.92992e-05					111.329	-0.000207783	9.42342e-07	9.42342e-07
13.8687	-0.000334874					93.5001	-0.000674732	2.14375e-06	2.14375e-06		13.8685	-7.32206e-05					93.4317	-0.0002049	2.20737e-06	2.20737e-06
14.8066	-0.000351618					78.4265	-0.000681436	1.70187e-06	1.70187e-06		14.8064	-7.72975e-05					78.4591	-0.000197066	8.28353e-07	8.28353e-07
15.8079	-0.000368727					65.8413	-0.000683914	1.50048e-08	1.50048e-08		15.8077	-8.15273e-05					65.8869	-0.000193146	1.2762e-06	1.2762e-06
16.8769	-0.000386146					55.2666	-0.000662317	2.84744e-06	2.84744e-06		16.8767	-8.59061e-05					55.2723	-0.000178558	2.15678e-06	2.15678e-06
18.0182	-0.000403818					46.4033	-0.000641477	1.6705e-06	1.6705e-06		18.018	-9.04285e-05					46.3875	-0.00016441	2.00858e-06	2.00858e-06
19.2367	-0.000421672					38.9606	-0.000603754	1.59413e-06	1.59413e-06		19.2365	-9.50874e-05					38.9446	-0.000150162	5.3061e-07	5.3061e-07
20.5376	-0.000439635					32.6946	-0.000566962	4.67059e-06	4.67059e-06		20.5374	-9.98745e-05					32.6858	-0.000135407	1.9092e-06	1.9092e-06
21.9265	-0.000457624					27.4472	-0.000523531	4.55207e-06	4.55207e-06		21.9263	-0.000104779					27.437	-0.00012699	2.12348e-06	2.12348e-06
23.4093	-0.000475548					23.0398	-0.000487633	2.09536e-06	2.09536e-06		23.409	-0.00010979					23.0307	-0.000110859	2.3542e-06	2.3542e-06
24.9924	-0.000493311					19.338	-0.000443043	6.10452e-07	6.10452e-07		24.9921	-0.000114892					19.3372	-9.49449e-05	1.76937e-06	1.76937e-06
26.6825	-0.000510811					16.2316	-0.000391636	2.58399e-06	2.58399e-06		26.6822	-0.000120071					16.2293	-8.61062e-05	3.95838e-06	3.95838e-06
28.4869	-0.000527938					13.6254	-0.000355583	1.56957e-06	1.56957e-06		28.4866	-0.000125308					13.6252	-7.22766e-05	2.22102e-06	2.22102e-06
30.4133	-0.000544581					11.4358	-0.00032281	1.25939e-06	1.25939e-06		30.413	-0.000130583					11.4371	-6.38445e-05	1.90839e-06	1.90839e-06
32.4701	-0.000560622					9.5991	-0.000280581	2.33752e-06	2.33752e-06		32.4697	-0.000135875					9.59874	-5.51428e-05	3.10082e-06	3.10082e-06
34.6659	-0.000575943					8.05796	-0.000243958	3.22272e-06	3.22272e-06		34.6655	-0.000141162					8.05672	-4.09162e-05	1.68614e-06	1.68614e-06
37.0102	-0.000590423					6.76275	-0.000211626	1.48324e-06	1.48324e-06		37.0098	-0.000146417					6.76364	-2.94734e-05	2.00063e-06	2.00063e-06
39.513	-0.000603944					5.67692	-0.000176698	2.43591e-06	2.43591e-06		39.5126	-0.000151614					5.67677	-2.05941e-05	1.66381e-06	1.66381e-06
42.1851	-0.000616388					4.76553	-0.000148424	8.53735e-07	8.53735e-07		42.1847	-0.000156725					4.76542	-1.29971e-05	2.55092e-06	2.55092e-06
45.0379	-0.00062764					4.00014	-0.000128591	1.33125e-06	1.33125e-06		45.0375	-0.000161721					4.00008	-4.60122e-06	1.6088e-06	1.6088e-06
48.0836	-0.00063759										48.0832	-0.000166572
51.3353	-0.000646137										51.3348	-0.000171246
54.8069	-0.000653186										54.8064	-0.000175712
58.5132	-0.000658653										58.5127	-0.000179938
62.4702	-0.000662466										62.4697	-0.000183894
66.6948	-0.000664563										66.6943	-0.000187548
71.2051	-0.000664899										71.2045	-0.00019087
76.0204	-0.000663444										76.0198	-0.000193833
81.1613	-0.000660181										81.1607	-0.000196408
86.6499	-0.000655113										86.6492	-0.000198572
92.5096	-0.000648257										92.5089	-0.000200302
98.7657	-0.000639648										98.7649	-0.00020158
105.445	-0.000629337										105.444	-0.000202387
112.576	-0.000617392										112.575	-0.000202713
120.189	-0.000603894										120.188	-0.000202546
128.316	-0.000588941										128.315	-0.000201883
136.994	-0.000572642										136.993	-0.000200722
146.258	-0.000555117										146.257	-0.000199065
156.149	-0.000536496										156.148	-0.00019692
166.709	-0.000516917										166.708	-0.000194297
177.982	-0.000496524										177.981	-0.000191211
190.019	-0.000475465										190.017	-0.000187681
202.869	-0.000453888										202.867	-0.000183729
216.588	-0.000431944										216.587	-0.000179381
231.235	-0.000409778										231.233	-0.000174666
246.872	-0.000387535										246.871	-0.000169615
263.567	-0.000365351										263.566	-0.000164263
281.391	-0.000343357										281.389	-0.000158644
300.42	-0.000321674										300.419	-0.000152796
320.736	-0.000300415										320.735	-0.000146758
342.426	-0.000279681										342.425	-0.000140567
365.583	-0.000259562										365.581	-0.000134263
390.306	-0.000240137										390.304	-0.000127883
416.7	-0.000221473										416.699	-0.000121465
444.88	-0.000203624										444.878	-0.000115045
474.965	-0.000186633										474.963	-0.000108658
507.085	-0.000170532										507.083	-0.000102337
541.377	-0.000155342										541.375	-9.61123e-05
577.988	-0.000141073										577.986	-9.00114e-05
617.075	-0.000127725										617.073	-8.40601e-05
658.805	-0.000115292										658.803	-7.82811e-05
703.357	-0.000103757										703.355	-7.26941e-05
750.922	-9.30998e-05										750.92	-6.73161e-05
801.704	-8.32914e-05										801.701	-6.2161e-05
855.919	-7.42993e-05										855.917	-5.724e-05
913.801	-6.60871e-05										913.799	-5.25615e-05
975.598	-5.8615e-05										975.596	-4.8131e-05
1041.57	-5.18415e-05										1041.57	-4.39517e-05
1112.01	-4.57233e-05										1112.01	-4.00246e-05
1187.21	-4.02167e-05										1187.21	-3.63482e-05
1267.5	-3.52778e-05										1267.49	-3.29193e-05
1353.21	-3.08632e-05										1353.21	-2.97328e-05
1444.72	-2.69305e-05										1444.72	-2.67822e-05
1542.42	-2.34386e-05										1542.42	-2.40598e-05
1646.73	-2.03481e-05										1646.73	-2.15565e-05
1758.09	-1.76214e-05										1758.09	-1.92627e-05
1876.98	-1.52233e-05										1876.98	-1.71679e-05
2003.92	-1.31204e-05										2003.92	-1.52613e-05
2139.43	-1.12819e-05										2139.43	-1.35315e-05
2284.11	-9.67918e-06										2284.11	-1.19673e-05
2438.58	-8.2859e-06										2438.58	-1.05573e-05
2603.49	-7.07803e-06										2603.49	-9.2903e-06
